# Supplementary material for: Identification of key proteins in the signaling crossroads between wound healing and cancer hallmark phenotypes
Source: Sci Rep. 2021 Aug 26;11:17245. doi: 10.1038/s41598-021-96750-5 (PMC8390472; doi:10.1038/s41598-021-96750-5)
Supplement: Supplementary file 1 — Supplementary Information. [file 41598_2021_96750_MOESM1_ESM.xlsx]

## Sheet: ST1
Supplementary Table 1. Human genes involved in wound healing GO:0042060
GENE SYMBOL	GENE ID
ABAT	18
ABCC8	6833
ACTA2	59
ACTG1	71
ACVRL1	94
ADAMTS13	11093
ADAMTS18	170692
ADIPOR2	79602
ADRA2A	150
ADRA2C	152
ADRB1	153
ADRB2	154
ADTRP	84830
AGER	177
AHNAK2	113146
AJAP1	55966
AJUBA	84962
ALOX5	240
ALOX12	239
ALOX15	246
ANO6	196527
ANXA1	301
ANXA2	302
ANXA5	308
ANXA6	309
ANXA8	653145
AP3B1	8546
APOE	348
APOH	350
AQP1	358
ARFGEF1	10565
ARHGAP24	83478
ARHGAP35	2909
ARHGEF19	128272
AXL	558
B4GALT1	2683
BLK	640
BLOC1S3	388552
BLOC1S4	55330
BLOC1S6	26258
BNC1	646
C1GALT1C1	29071
C1QTNF1	114897
C3	718
C9	735
CADM4	199731
CARMIL2	146206
CASK	8573
CAV1	857
CAV3	859
CCL2	6347
CCM2L	140706
CCN1	3491
CCN4	8840
CCR2	729230
CD9	928
CD34	947
CD36	948
CD40LG	959
CD44	960
CD109	135228
CD151	977
CDKN1A	1026
CEACAM1	634
CELA2A	63036
CELSR1	9620
CFH	3075
CFLAR	8837
CLASP1	23332
CLASP2	23122
CLDN1	9076
CLDN3	1365
CLDN4	1364
CLDN19	149461
CLEC10A	10462
CNN2	1265
COL1A1	1277
COL3A1	1281
COL5A1	1289
COMP	1311
CORO1B	57175
CPB2	1361
CRK	1398
CRP	1401
CX3CL1	6376
CXADR	1525
CXCR4	7852
DCBLD2	131566
DDR1	780
DMTN	2039
DRD5	1816
DSP	1832
DST	667
DTNBP1	84062
DUOX1	53905
DUOX2	50506
DUSP10	11221
DYSF	8291
EGFR	1956
ELK3	2004
ENG	2022
ENPP4	22875
ENTPD1	953
ENTPD2	954
EPB41L4B	54566
EPHB2	2048
EPPK1	83481
ERBB2	2064
EVL	51466
EVPL	2125
EXT1	2131
F2	2147
F2R	2149
F2RL1	2150
F2RL2	2151
F2RL3	9002
F3	2152
F5	2153
F7	2155
F8	2157
F9	2158
F10	2159
F11	2160
F11R	50848
F12	2161
F13A1	2162
F13B	2165
FBLN1	2192
FCER1G	2207
FER1L5	90342
FERMT1	55612
FERMT2	10979
FERMT3	83706
FGA	2243
FGB	2244
FGF1	2246
FGF2	2247
FGF7	2252
FGF10	2255
FGFR1OP2	26127
FGG	2266
FKBP10	60681
FLNA	2316
FN1	2335
FNTB	2342
FOXA2	3170
FOXC2	2303
FZD6	8323
FZD7	8324
GAS6	2621
GATA1	2623
GATA2	2624
GATA4	2626
GJA1	2697
GNA13	10672
GNAS	2778
GP1BA	2811
GP1BB	2812
GP5	2814
GP6	51206
GP9	2815
GPR4	2828
GPX1	2876
GRHL3	57822
HBEGF	1839
HGFAC	3083
HIF1A	3091
HMGB1	3146
HMGCR	3156
HMOX1	3162
HNF4A	3172
HPS1	3257
HPS4	89781
HPS5	11234
HPS6	79803
HPSE	10855
HRAS	3265
HRG	3273
IGF1	3479
IL1A	3552
INSL3	3640
ITGA2B	3674
ITGB1	3688
ITGB3	3690
JAML	120425
KANK1	23189
KDR	3791
KLKB1	3818
KNG1	3827
KRT6A	3853
LNPK	80856
LOX	4015
LYN	4067
LYST	1130
MACF1	23499
MAP3K1	4214
MERTK	10461
MIA3	375056
MMP12	4321
MMRN1	22915
MPIG6B	80739
MRTFA	57591
MSX2	4488
MTOR	2475
MUC16	94025
MUSTN1	389125
MYH2	4620
MYH9	4627
MYH10	4628
MYLK	4638
MYOF	26509
MYOZ1	58529
NACA	4666
NBEAL2	23218
NDNF	79625
NF1	4763
NFE2L2	4780
NLRP6	171389
NOG	9241
NOTCH2	4853
P2RX1	5023
P2RY1	5028
P2RY12	64805
PAK1	5058
PAPSS2	9060
PARD3	56288
PDCD10	11235
PDGFA	5154
PDGFB	5155
PDGFRA	5156
PDPN	10630
PEAR1	375033
PECAM1	5175
PF4	5196
PHLDB2	90102
PIK3CB	5291
PIP5K1C	23396
PLA2G4A	5321
PLAU	5328
PLEC	5339
PLEK	5341
PLET1	349633
PLG	5340
PLPP3	8613
POU2F3	25833
PPARA	5465
PPARD	5467
PPIA	5478
PPL	5493
PRCP	5547
PRDX2	7001
PRKCA	5578
PRKCD	5580
PRKCE	5581
PRKCQ	5588
PRKG1	5592
PROC	5624
PROCR	10544
PROS1	5627
PROZ	8858
PRSS56	646960
PTEN	5728
PTGER3	5733
PTGER4	5734
PTK2	5747
PTK7	5754
PTPN6	5777
PTPRJ	5795
RAB3A	5864
RAB27A	5873
RAP2B	5912
REG3A	5068
REG3G	130120
RREB1	6239
S100A9	6280
SCNN1B	6338
SCNN1G	6340
SCRIB	23513
SDC1	6382
SDC4	6385
SELP	6403
SERPINA10	51156
SERPINB2	5055
SERPINC1	462
SERPIND1	3053
SERPINE1	5054
SERPINE2	5270
SERPINF2	5345
SERPING1	710
SH2B3	10019
SHH	6469
SLC4A1	6521
SLC7A11	23657
SLC11A1	6556
SLC12A2	6558
SMAD3	4088
SMAD4	4089
SMOC2	64094
SNAI2	6591
SRF	6722
SRSF6	6431
ST3GAL4	6484
STARD13	90627
STXBP1	6812
STXBP3	6814
SYK	6850
SYT7	9066
SYT11	23208
SYTL4	94121
TBXA2R	6915
NR4A3	8013
TFPI	7035
TFPI2	7980
TGFB1	7040
TGFB2	7042
THBD	7056
THBS1	7057
TIMP1	7076
TLR4	7099
TMEFF2	23671
TNF	7124
TNFRSF12A	51330
TOR1A	1861
TPM1	7168
TPSAB1	7177
TREML1	340205
TRIM72	493829
TSPAN8	7103
TSPAN32	10077
TXK	7294
TYRO3	7301
UBASH3A	53347
UBASH3B	84959
VANGL2	57216
VEGFA	7422
VEGFB	7423
VIL1	7429
VKORC1	79001
VPS33B	26276
VWF	7450
WFDC1	58189
WNT3A	89780
WNT4	54361
WNT5A	7474
WNT7A	7476
XBP1	7494
YAP1	10413

## Sheet: ST2
Supplementary Table 2. Cancer driver genes according to intOGen and the Cancer Gene Census
GENE SYMBOL	GENE ID
A1CF	29974
ABCB1	5243
ABI1	10006
ABL1	25
ABL2	27
ACKR3	57007
ACSL3	2181
ACSL6	23305
ACVR1	90
ACVR2A	92
ADGRB1	575
AFDN	4301
AFF1	4299
AFF3	3899
AFF4	27125
AJUBA	84962
AKAP9	10142
AKT1	207
AKT2	208
AKT3	10000
ALB	213
ALDH2	217
ALK	238
AMER1	139285
ANK1	286
APC	324
APOBEC3B	9582
AR	367
ARAF	369
ARHGAP26	23092
ARHGAP35	2909
ARHGAP5	394
ARHGEF10	9639
ARHGEF10L	55160
ARHGEF12	23365
ARID1A	8289
ARID1B	57492
ARID2	196528
ARNT	405
ASPSCR1	79058
ASXL1	171023
ASXL2	55252
ATF1	466
ATF7IP	55729
ATG7	10533
ATIC	471
ATM	472
ATP1A1	476
ATP2B3	492
ATR	545
ATRX	546
AXIN1	8312
AXIN2	8313
B2M	567
BAP1	8314
BARD1	580
BAX	581
BAZ1A	11177
BCL10	8915
BCL11A	53335
BCL11B	64919
BCL2	596
BCL2L12	83596
BCL3	602
BCL6	604
BCL7A	605
BCL9	607
BCL9L	283149
BCLAF1	9774
BCOR	54880
BCORL1	63035
BCR	613
BIRC3	330
BIRC6	57448
BLM	641
BMP5	653
BMPR1A	657
BMPR2	659
BRAF	673
BRCA1	672
BRCA2	675
BRD3	8019
BRD4	23476
BRD7	29117
BRIP1	83990
BTG1	694
BTK	695
BUB1B	701
C15orf65	145788
CACNA1D	776
CALR	811
CAMTA1	23261
CANT1	124583
CARD11	84433
CARS	833
CASP3	836
CASP8	841
CASP9	842
CASZ1	54897
CBFA2T3	863
CBFB	865
CBL	867
CBLB	868
CBLC	23624
CCDC6	8030
CCNB1IP1	57820
CCNC	892
CCND1	595
CCND2	894
CCND3	896
CCNE1	898
CCR4	1233
CCR7	1236
CD209	30835
CD274	29126
CD28	940
CD58	965
CD74	972
CD79A	973
CD79B	974
CDC73	79577
CDH1	999
CDH10	1008
CDH11	1009
CDH17	1015
CDK12	51755
CDK4	1019
CDK6	1021
CDKN1A	1026
CDKN1B	1027
CDKN2A	1029
CDKN2C	1031
CDX2	1045
CEBPA	1050
CEP89	84902
CHCHD7	79145
CHD2	1106
CHD4	1108
CHEK2	11200
CHIC2	26511
CHST11	50515
CIC	23152
CIITA	4261
CLIP1	6249
CLP1	10978
CLTC	1213
CLTCL1	8218
CMTR2	55783
CNBD1	168975
CNBP	7555
CNOT3	4849
CNOT9	9125
CNTNAP2	26047
CNTRL	11064
COL1A1	1277
COL2A1	1280
COL3A1	1281
COX6C	1345
CPEB3	22849
CR1	1378
CREB1	1385
CREB3L1	90993
CREB3L2	64764
CREBBP	1387
CRLF2	64109
CRNKL1	51340
CRTC1	23373
CRTC3	64784
CSF1R	1436
CSF3R	1441
CSMD3	114788
CTCF	10664
CTNNA2	1496
CTNNB1	1499
CTNND1	1500
CTNND2	1501
CUL3	8452
CUX1	1523
CXCR4	7852
CYLD	1540
CYP2C8	1558
CYSLTR2	57105
DAXX	1616
DAZAP1	26528
DCAF12L2	340578
DCC	1630
DCSTAMP	81501
DCTN1	1639
DDB2	1643
DDIT3	1649
DDR2	4921
DDX10	1662
DDX3X	1654
DDX5	1655
DDX6	1656
DEK	7913
DGCR8	54487
DHX9	1660
DICER1	23405
DIS3	22894
DNAJB1	3337
DNM2	1785
DNMT3A	1788
DOT1L	84444
DROSHA	29102
DTX1	1840
DUSP16	80824
DUX4L1	22947
EBF1	1879
ECT2L	345930
EED	8726
EFTUD2	9343
EGFR	1956
EGR2	1959
EHD2	30846
EIF1AX	1964
EIF3E	3646
EIF4A2	1974
ELF3	1999
ELF4	2000
ELK4	2005
ELL	8178
ELN	2006
EML4	27436
ENPEP	2028
EP300	2033
EPAS1	2034
EPHA2	1969
EPHA3	2042
EPHA7	2045
EPS15	2060
ERBB2	2064
ERBB3	2065
ERBB4	2066
ERC1	23085
ERCC2	2068
ERCC3	2071
ERCC4	2072
ERCC5	2073
ERG	2078
ESR1	2099
ESRRA	2101
ETNK1	55500
ETV1	2115
ETV4	2118
ETV5	2119
ETV6	2120
EWSR1	2130
EXT1	2131
EXT2	2132
EZH2	2146
EZR	7430
FAM131B	9715
FAM135B	51059
FAM174B	400451
FAM186A	121006
FAM47C	442444
FANCA	2175
FANCC	2176
FANCD2	2177
FANCE	2178
FANCF	2188
FANCG	2189
FAS	355
FAT1	2195
FAT2	2196
FAT3	120114
FAT4	79633
FBLN1	2192
FBLN2	2199
FBN2	2201
FBXO11	80204
FBXW7	55294
FCGR2B	2213
FCRL4	83417
FEN1	2237
FES	2242
FEV	54738
FGD5	152273
FGFR1	2260
FGFR1OP	-
FGFR2	2263
FGFR3	2261
FGFR4	2264
FH	2271
FHIT	2272
FIP1L1	81608
FKBP9	11328
FLCN	201163
FLI1	2313
FLNA	2316
FLT3	2322
FLT4	2324
FN1	2335
FNBP1	23048
FOXA1	3169
FOXA2	3170
FOXD4L1	200350
FOXL2	668
FOXO1	2308
FOXO3	2309
FOXO4	4303
FOXP1	27086
FOXR1	283150
FSTL3	10272
FUBP1	8880
FUS	2521
GAS7	8522
GATA1	2623
GATA2	2624
GATA3	2625
GLI1	2735
GMPS	8833
GNA11	2767
GNA13	10672
GNAI2	2771
GNAQ	2776
GNAS	2778
GOLGA5	9950
GOPC	57120
GPC3	2719
GPC5	2262
GPHN	10243
GRIN2A	2903
GRM3	2913
GTF2I	2969
H3F3A	-
H3F3B	3020; 3021
HERC2	8924
HERPUD1	9709
HEY1	23462
HGF	3082
HIF1A	3091
HIP1	3092
HIST1H3B	-
HIST1H4I	-
HLA-A	3105
HLA-B	3106
HLF	3131
HMGA1	3159
HMGA2	8091
HMGN2P46	283651
HNF1A	6927
HNRNPA2B1	3181
HOOK3	84376
HOXA11	3207
HOXA13	3209
HOXA9	3205
HOXC11	3227
HOXC13	3229
HOXD11	3237
HOXD13	3239
HRAS	3265
HSP90AA1	3320
HSP90AB1	3326
HSPG2	3339
HTRA2	27429
ID3	3399
IDH1	3417
IDH2	3418
IFNAR1	3454
IFNGR1	3459
IGF2BP2	10644
IGH	3492
IGK	50802
IGL	3535
IKBKB	3551
IKZF1	10320
IKZF3	22806
IL2	3558
IL21R	50615
IL6ST	3572
IL7R	3575
ING1	3621
INO80	54617
IRAK1	3654
IRF1	3659
IRF4	3662
IRS4	8471
ISX	91464
ITGAV	3685
ITK	3702
JAK1	3716
JAK2	3717
JAK3	3718
JAZF1	221895
JUN	3725
KAT6A	7994
KAT6B	23522
KAT7	11143
KCNJ5	3762
KDM3B	51780
KDM5A	5927
KDM5C	8242
KDM6A	7403
KDR	3791
KDSR	2531
KEAP1	9817
KEL	3792
KIAA1549	57670
KIF5B	3799
KIFC1	3833
KIT	3815
KLF4	9314
KLF5	688
KLF6	1316
KLHL36	79786
KLHL6	89857
KLK2	3817
KMT2A	4297
KMT2B	9757
KMT2C	58508
KMT2D	8085
KNL1	57082
KNSTRN	90417
KRAS	3845
KTN1	3895
LARP4B	23185
LASP1	3927
LATS1	9113
LATS2	26524
LCK	3932
LCP1	3936
LDB1	8861
LEF1	51176
LEPROTL1	23484
LHFPL6	10186
LIFR	3977
LMNA	4000
LMO1	4004
LMO2	4005
LOX	4015
LPAR4	2846
LPP	4026
LRIG3	121227
LRP1B	53353
LSM14A	26065
LTB	4050
LY75-CD302	100526664
LYL1	4066
LZTR1	8216
MACC1	346389
MAF	4094
MAFB	9935
MALAT1	378938
MALT1	10892
MAML2	84441
MAP2	4133
MAP2K1	5604
MAP2K2	5605
MAP2K4	6416
MAP2K7	5609
MAP3K1	4214
MAP3K13	9175
MAPK1	5594
MARK2	2011
MAX	4149
MB21D2	151963
MCM3AP	8888
MDM2	4193
MDM4	4194
MDS2	259283
MECOM	2122
MED12	9968
MEF2B	100271849
MEN1	4221
MET	4233
MGA	23269
MGMT	4255
MITF	4286
MLF1	4291
MLH1	4292
MLLT1	4298
MLLT10	8028
MLLT11	10962
MLLT3	4300
MLLT6	4302
MN1	4330
MNX1	3110
MPL	4352
MRTFA	57591
MSH2	4436
MSH6	2956
MSI2	124540
MSN	4478
MTCP1	4515
MTOR	2475
MUC1	4582
MUC16	94025
MUC4	4585
MUTYH	4595
MYB	4602
MYC	4609
MYCL	4610
MYCN	4613
MYD88	4615
MYH11	4629
MYH9	4627
MYO5A	4644
MYOD1	4654
N4BP2	55728
NAB2	4665
NACA	4666
NBEA	26960
NBN	4683
NCKIPSD	51517
NCOA1	8648
NCOA2	10499
NCOA4	8031
NCOR1	9611
NCOR2	9612
NDRG1	10397
NEFH	4744
NF1	4763
NF2	4771
NFATC2	4773
NFE2L2	4780
NFIB	4781
NFKB2	4791
NFKBIA	4792
NFKBIE	4794
NIN	51199
NIPBL	25836
NKTR	4820
NKX2-1	7080
NONO	4841
NOTCH1	4851
NOTCH2	4853
NPEPPS	9520
NPM1	4869
NPRL2	10641
NR4A3	8013
NRAS	4893
NRG1	3084
NRK	203447
NRP1	8829
NSD1	64324
NSD2	7468
NSD3	54904
NT5C2	22978
NT5C3A	51251
NTHL1	4913
NTRK1	4914
NTRK3	4916
NUMA1	4926
NUP214	8021
NUP98	4928
NUTM1	256646
NUTM2B	729262
NUTM2D	728130
NXF1	10482
OLIG2	10215
OMD	4958
P2RY8	286530
PABPC1	26986
PAFAH1B2	5049
PAK2	5062
PALB2	79728
PARP4	143
PATZ1	23598
PAX3	5077
PAX5	5079
PAX7	5081
PAX8	7849
PBRM1	55193
PBX1	5087
PCBP1	5093
PCDH17	27253
PCM1	5108
PCMTD1	115294
PDCD1LG2	80380
PDE4DIP	9659
PDGFB	5155
PDGFRA	5156
PDGFRB	5159
PDPR	55066
PEG3	5178
PER1	5187
PHF6	84295
PHOX2B	8929
PICALM	8301
PIK3CA	5290
PIK3CB	5291
PIK3R1	5295
PIM1	5292
PLAG1	5324
PLCB4	5332
PLCG1	5335
PML	5371
PMS1	5378
PMS2	5395
POLD1	5424
POLE	5426
POLG	5428
POLQ	10721
POT1	25913
POU2AF1	5450
POU2F2	5452
POU5F1	5460
PPARG	5468
PPFIBP1	8496
PPM1D	8493
PPP2R1A	5518
PPP3CA	5530
PPP6C	5537
PPT2	9374
PRCC	5546
PRDM1	639
PRDM16	63976
PRDM2	7799
PREX2	80243
PRF1	5551
PRKACA	5566
PRKAR1A	5573
PRKCB	5579
PRKCD	5580
PRKD2	25865
PRPF40B	25766
PRR14	78994
PRRX1	5396
PSIP1	11168
PTCH1	5727
PTEN	5728
PTK6	5753
PTMA	5757
PTPN11	5781
PTPN13	5783
PTPN14	5784
PTPN6	5777
PTPRB	5787
PTPRC	5788
PTPRD	5789
PTPRK	5796
PTPRT	11122
PWWP2A	114825
QKI	9444
RABEP1	9135
RAC1	5879
RAD17	5884
RAD21	5885
RAD51B	5890
RAF1	5894
RALGDS	5900
RANBP2	5903
RAP1GDS1	5910
RARA	5914
RASA1	5921
RASA2	5922
RB1	5925
RBFOX1	54715
RBFOX2	23543
RBM10	8241
RBM15	64783
RBM38	55544
RBM39	9584
RECQL4	9401
REL	5966
RELA	5970
RET	5979
RFWD3	55159
RGL3	57139
RGPD3	653489
RGS7	6000
RHOA	387
RHOH	399
RHPN2	85415
RIPK1	8737
RMI2	116028
RNF213	57674
RNF43	54894
RNF6	6049
ROBO2	6092
ROS1	6098
RPL10	6134
RPL22	6146
RPL5	6125
RPN1	6184
RPS3A	6189
RPS6KA3	6197
RRAGC	64121
RRAS2	22800
RSPH10B2	728194
RSPO2	340419
RSPO3	84870
RUNX1	861
RUNX1T1	862
RXRA	6256
S100A7	6278
SALL4	57167
SATB1	6304
SBDS	51119
SDC4	6385
SDHA	6389
SDHAF2	54949
SDHB	6390
SDHC	6391
SDHD	6392
SEPTIN5	5413
SEPTIN6	23157
SEPTIN9	10801
SET	6418
SETBP1	26040
SETD1B	23067
SETD2	29072
SETDB1	9869
SF3B1	23451
SFMBT2	57713
SFPQ	6421
SFRP4	6424
SGK1	6446
SH2B3	10019
SH3GL1	6455
SHTN1	57698
SIN3A	25942
SIRPA	140885
SIX1	6495
SIX2	10736
SKI	6497
SLC34A2	10568
SLC45A3	85414
SMAD2	4087
SMAD3	4088
SMAD4	4089
SMARCA1	6594
SMARCA4	6597
SMARCB1	6598
SMARCD1	6602
SMARCE1	6605
SMC1A	8243
SMO	6608
SND1	27044
SNX29	92017
SOCS1	8651
SOHLH2	54937
SOS1	6654
SOX17	64321
SOX2	6657
SOX21	11166
SOX9	6662
SP140	11262
SPECC1	92521
SPEN	23013
SPOP	8405
SRC	6714
SRGAP3	9901
SRSF2	6427
SRSF3	6428
SS18	6760
SS18L1	26039
SSX1	6756
SSX2	6757
SSX4	6759
STAG1	10274
STAG2	10735
STAT3	6774
STAT5B	6777
STAT6	6778
STIL	6491
STK11	6794
STRN	6801
SUFU	51684
SUSD2	56241
SUZ12	23512
SYK	6850
TAF15	8148
TAL1	6886
TAL2	6887
TBL1XR1	79718
TBX3	6926
TCEA1	6917
TCF12	6938
TCF3	6929
TCF4	6925
TCF7L2	6934
TCIRG1	10312
TCL1A	8115
TENT5C	54855
TERT	7015
TET1	80312
TET2	54790
TFAP4	7023
TFE3	7030
TFEB	7942
TFG	10342
TFPT	29844
TFRC	7037
TGFBR2	7048
TGIF1	7050
THRAP3	9967
TLL1	7092
TLX1	3195
TLX3	30012
TMEM127	55654
TMPRSS2	7113
TNC	3371
TNFAIP3	7128
TNFRSF14	8764
TNFRSF17	608
TOP1	7150
TOP2A	7153
TP53	7157
TP63	8626
TPM3	7170
TPM4	7171
TPR	7175
TRA	6955
TRAF3	7187
TRAF7	84231
TRB	6957
TRD	6964
TRIM24	8805
TRIM27	5987
TRIM33	51592
TRIM49C	642612
TRIP11	9321
TRRAP	8295
TSC1	7248
TSC2	7249
TSHR	7253
U2AF1	7307
U2AF2	11338
UBE2A	7319
UBE2D2	7322
UBR5	51366
UGT2B17	7367
USP44	84101
USP6	9098
USP8	9101
USP9X	8239
VAV1	7409
VHL	7428
VTI1A	143187
WAS	7454
WDCP	80304
WDR45	11152
WIF1	11197
WNK2	65268
WNK4	65266
WRN	7486
WT1	7490
WWTR1	25937
XPA	7507
XPC	7508
XPO1	7514
YWHAE	7531
ZBTB16	7704
ZBTB20	26137
ZBTB7B	51043
ZCCHC8	55596
ZCRB1	85437
ZEB1	6935
ZFHX3	463
ZFP36L1	677
ZFX	7543
ZMYM2	7750
ZMYM3	9203
ZNF148	7707
ZNF165	7718
ZNF208	7757
ZNF331	55422
ZNF384	171017
ZNF429	353088
ZNF479	90827
ZNF521	25925
ZNF626	199777
ZNF680	340252
ZNF721	170960
ZNF780A	284323
ZNF814	730051
ZNF93	81931
ZNRF3	84133
ZRSR2	8233
ZXDB	158586

## Sheet: ST3
Supplementary Table 3. Mean frequency of CNV amplifications per TCGA Pan-Cancer type
Genes	ACC		BLCA		BRCA		CESC		CHOL		COAD		ESCA		GBM		HNSC		KICH		KIRC		LGG		LIHC		LUAD		LUSC		MESO		OV		PAAD		PRAD		SARC		SKCM		STAD		TGCT		THCA		THYM
	N = 87	f	N = 411	f	N = 1084	f	N = 297	f	N = 36	f	N = 594	f	N = 182	f	N = 585	f	N = 523	f	N = 65	f	N = 512	f	N = 514	f	N = 372	f	N = 566	f	N = 487	f	N = 87	f	N = 585	f	N = 184	f	N = 494	f	N = 255	f	N = 442	f	N = 440	f	N = 149	f	N = 499	f	N = 123
ABAT	2	0.0229885	19	0.0462287	41	0.0378229	3	0.010101	0	0	0	0	2	0.010989	3	0.00512821	4	0.00764818	0	0	0	0	2	0.00389105	0	0	3	0.00530035	3	0.00616016	0	0	10	0.017094	0	0	6	0.0121457	5	0.0196078	1	0.00226244	4	0.00909091	0	0	1	0.00200401	0
ABCC8	0	0	1	0.00243309	9	0.00830258	0	0	0	0	1	0.0016835	1	0.00549451	0	0	1	0.00191205	0	0	0	0	2	0.00389105	1	0.00268817	1	0.00176678	4	0.00821355	0	0	2	0.0034188	1	0.00543478	2	0.00404858	3	0.0117647	1	0.00226244	3	0.00681818	0	0	0	0	0
ACTA2	0	0	2	0.00486618	1	0.000922509	0	0	0	0	1	0.0016835	1	0.00549451	1	0.0017094	0	0	0	0	0	0	0	0	1	0.00268817	0	0	0	0	0	0	1	0.0017094	0	0	2	0.00404858	1	0.00392157	0	0	0	0	0	0	0	0	0
ACTG1	2	0.0229885	6	0.0145985	38	0.0350554	0	0	1	0.0277778	6	0.010101	2	0.010989	0	0	2	0.00382409	0	0	1	0.00195312	8	0.0155642	16	0.0430108	9	0.0159011	8	0.0164271	3	0.0344828	19	0.0324786	1	0.00543478	2	0.00404858	5	0.0196078	12	0.0271493	4	0.00909091	0	0	1	0.00200401	1
ACVRL1	5	0.0574713	9	0.0218978	3	0.00276753	1	0.003367	0	0	1	0.0016835	1	0.00549451	4	0.00683761	0	0	0	0	0	0	0	0	2	0.00537634	4	0.00706714	0	0	0	0	2	0.0034188	0	0	5	0.0101215	7	0.027451	2	0.00452489	0	0	1	0.00671141	0	0	0
ADAMTS13	2	0.0229885	1	0.00243309	3	0.00276753	0	0	0	0	1	0.0016835	2	0.010989	3	0.00512821	4	0.00764818	1	0.0153846	0	0	6	0.0116732	2	0.00537634	1	0.00176678	1	0.00205339	0	0	4	0.00683761	0	0	7	0.01417	4	0.0156863	0	0	5	0.0113636	0	0	1	0.00200401	0
ADAMTS18	0	0	6	0.0145985	1	0.000922509	1	0.003367	0	0	0	0	0	0	0	0	1	0.00191205	0	0	0	0	0	0	1	0.00268817	1	0.00176678	0	0	0	0	1	0.0017094	1	0.00543478	1	0.00202429	0	0	0	0	3	0.00681818	0	0	0	0	2
ADIPOR2	1	0.0114943	8	0.0194647	8	0.00738007	3	0.010101	1	0.0277778	12	0.020202	6	0.032967	10	0.017094	12	0.0229446	0	0	2	0.00390625	21	0.040856	0	0	8	0.0141343	17	0.0349076	2	0.0229885	42	0.0717949	7	0.0380435	2	0.00404858	7	0.027451	7	0.0158371	8	0.0181818	8	0.0536913	0	0	1
ADRA2A	0	0	0	0	0	0	0	0	0	0	1	0.0016835	0	0	2	0.0034188	0	0	0	0	0	0	0	0	0	0	2	0.00353357	0	0	0	0	3	0.00512821	0	0	0	0	0	0	1	0.00226244	1	0.00227273	0	0	0	0	0
ADRA2C	0	0	4	0.00973236	0	0	0	0	0	0	1	0.0016835	1	0.00549451	0	0	0	0	0	0	0	0	1	0.00194553	0	0	4	0.00706714	0	0	0	0	14	0.0239316	1	0.00543478	2	0.00404858	2	0.00784314	2	0.00452489	0	0	0	0	1	0.00200401	0
ADRB1	0	0	0	0	0	0	0	0	0	0	1	0.0016835	0	0	0	0	0	0	0	0	1	0.00195312	0	0	0	0	4	0.00706714	0	0	0	0	9	0.0153846	0	0	1	0.00202429	0	0	0	0	3	0.00681818	0	0	0	0	0
ADRB2	1	0.0114943	3	0.00729927	2	0.00184502	0	0	1	0.0277778	0	0	0	0	0	0	0	0	1	0.0153846	29	0.0566406	1	0.00194553	2	0.00537634	2	0.00353357	0	0	0	0	7	0.0119658	2	0.0108696	3	0.00607287	2	0.00784314	1	0.00226244	2	0.00454545	0	0	1	0.00200401	0
ADTRP	0	0	14	0.0340633	7	0.00645756	2	0.00673401	1	0.0277778	1	0.0016835	4	0.021978	0	0	3	0.00573614	0	0	0	0	2	0.00389105	7	0.0188172	4	0.00706714	3	0.00616016	1	0.0114943	40	0.0683761	2	0.0108696	0	0	0	0	15	0.0339367	1	0.00227273	0	0	0	0	0
AGER	0	0	5	0.0121655	5	0.00461255	4	0.013468	1	0.0277778	3	0.00505051	5	0.0274725	0	0	4	0.00764818	0	0	0	0	2	0.00389105	8	0.0215054	6	0.0106007	2	0.00410678	0	0	19	0.0324786	4	0.0217391	1	0.00202429	1	0.00392157	11	0.0248869	8	0.0181818	0	0	0	0	0
AHNAK2	2	0.0229885	2	0.00486618	4	0.00369004	3	0.010101	0	0	1	0.0016835	3	0.0164835	3	0.00512821	5	0.00956023	1	0.0153846	0	0	1	0.00194553	1	0.00268817	5	0.00883392	14	0.0287474	0	0	24	0.0410256	0	0	2	0.00404858	6	0.0235294	0	0	0	0	0	0	0	0	0
AJAP1	1	0.0114943	3	0.00729927	0	0	0	0	0	0	0	0	4	0.021978	0	0	3	0.00573614	0	0	0	0	0	0	1	0.00268817	4	0.00706714	4	0.00821355	0	0	12	0.0205128	3	0.0163043	2	0.00404858	4	0.0156863	3	0.00678733	3	0.00681818	0	0	0	0	0
AJUBA	1	0.0114943	8	0.0194647	3	0.00276753	2	0.00673401	0	0	0	0	3	0.0164835	2	0.0034188	4	0.00764818	0	0	0	0	7	0.0136187	1	0.00268817	11	0.0194346	6	0.0123203	0	0	11	0.0188034	1	0.00543478	1	0.00202429	4	0.0156863	1	0.00226244	1	0.00227273	0	0	0	0	1
ALOX12	0	0	5	0.0121655	4	0.00369004	0	0	1	0.0277778	0	0	2	0.010989	2	0.0034188	2	0.00382409	0	0	0	0	3	0.00583658	1	0.00268817	1	0.00176678	1	0.00205339	0	0	2	0.0034188	0	0	3	0.00607287	2	0.00784314	0	0	2	0.00454545	0	0	0	0	1
ALOX15	0	0	1	0.00243309	0	0	0	0	0	0	0	0	0	0	0	0	0	0	0	0	0	0	1	0.00194553	0	0	0	0	0	0	0	0	6	0.0102564	1	0.00543478	0	0	4	0.0156863	2	0.00452489	1	0.00227273	0	0	0	0	0
ALOX5	0	0	3	0.00729927	0	0	0	0	0	0	0	0	0	0	0	0	0	0	0	0	0	0	1	0.00194553	0	0	0	0	0	0	0	0	5	0.00854701	0	0	0	0	4	0.0156863	4	0.00904977	1	0.00227273	0	0	0	0	0
ANO6	2	0.0229885	4	0.00973236	1	0.000922509	0	0	0	0	1	0.0016835	2	0.010989	3	0.00512821	2	0.00382409	0	0	0	0	1	0.00194553	0	0	2	0.00353357	8	0.0164271	0	0	15	0.025641	0	0	2	0.00404858	7	0.027451	4	0.00904977	3	0.00681818	0	0	0	0	0
ANXA1	1	0.0114943	1	0.00243309	0	0	0	0	0	0	0	0	3	0.0164835	3	0.00512821	2	0.00382409	0	0	0	0	0	0	1	0.00268817	1	0.00176678	1	0.00205339	0	0	9	0.0153846	1	0.00543478	0	0	7	0.027451	0	0	3	0.00681818	0	0	0	0	0
ANXA2	1	0.0114943	0	0	1	0.000922509	0	0	0	0	0	0	1	0.00549451	0	0	0	0	1	0.0153846	0	0	0	0	2	0.00537634	1	0.00176678	0	0	2	0.0229885	5	0.00854701	0	0	2	0.00404858	2	0.00784314	1	0.00226244	1	0.00227273	0	0	0	0	0
ANXA5	0	0	3	0.00729927	1	0.000922509	0	0	0	0	0	0	0	0	1	0.0017094	0	0	0	0	0	0	1	0.00194553	0	0	0	0	0	0	0	0	3	0.00512821	0	0	0	0	4	0.0156863	1	0.00226244	0	0	0	0	0	0	0
ANXA6	1	0.0114943	2	0.00486618	2	0.00184502	0	0	1	0.0277778	0	0	0	0	0	0	0	0	0	0	29	0.0566406	1	0.00194553	0	0	4	0.00706714	0	0	0	0	6	0.0102564	2	0.0108696	2	0.00404858	1	0.00392157	2	0.00452489	2	0.00454545	0	0	1	0.00200401	0
ANXA8	0	0	5	0.0121655	3	0.00276753	0	0	1	0.0277778	0	0	3	0.0164835	1	0.0017094	4	0.00764818	0	0	0	0	3	0.00583658	1	0.00268817	2	0.00353357	2	0.00410678	0	0	3	0.00512821	0	0	2	0.00404858	3	0.0117647	1	0.00226244	2	0.00454545	0	0	0	0	0
AP3B1	4	0.045977	0	0	0	0	1	0.003367	0	0	0	0	1	0.00549451	0	0	0	0	0	0	1	0.00195312	0	0	0	0	0	0	1	0.00205339	0	0	2	0.0034188	0	0	0	0	0	0	3	0.00678733	0	0	0	0	0	0	0
APOE	2	0.0229885	6	0.0145985	5	0.00461255	8	0.026936	0	0	0	0	3	0.0164835	1	0.0017094	4	0.00764818	0	0	1	0.00195312	1	0.00194553	6	0.016129	6	0.0106007	9	0.0184805	1	0.0114943	13	0.0222222	5	0.0271739	2	0.00404858	4	0.0156863	0	0	7	0.0159091	0	0	0	0	0
APOH	1	0.0114943	9	0.0218978	35	0.0322878	5	0.016835	0	0	9	0.0151515	3	0.0164835	1	0.0017094	0	0	0	0	1	0.00195312	8	0.0155642	11	0.0295699	9	0.0159011	4	0.00821355	5	0.0574713	7	0.0119658	2	0.0108696	3	0.00607287	3	0.0117647	8	0.0180995	6	0.0136364	0	0	1	0.00200401	2
AQP1	1	0.0114943	7	0.0170316	5	0.00461255	2	0.00673401	0	0	1	0.0016835	5	0.0274725	9	0.0153846	5	0.00956023	0	0	0	0	5	0.00972763	0	0	4	0.00706714	3	0.00616016	0	0	5	0.00854701	2	0.0108696	5	0.0101215	7	0.027451	5	0.0113122	5	0.0113636	0	0	0	0	0
ARFGEF1	0	0	11	0.026764	29	0.0267528	3	0.010101	0	0	7	0.0117845	5	0.0274725	2	0.0034188	10	0.0191205	0	0	4	0.0078125	1	0.00194553	23	0.061828	10	0.0176678	7	0.0143737	0	0	22	0.0376068	7	0.0380435	32	0.0647773	9	0.0352941	7	0.0158371	11	0.025	1	0.00671141	0	0	0
ARHGAP24	0	0	5	0.0121655	4	0.00369004	0	0	0	0	0	0	1	0.00549451	2	0.0034188	0	0	0	0	0	0	0	0	0	0	0	0	1	0.00205339	0	0	0	0	1	0.00543478	1	0.00202429	3	0.0117647	1	0.00226244	1	0.00227273	0	0	0	0	0
ARHGAP35	2	0.0229885	2	0.00486618	1	0.000922509	3	0.010101	0	0	0	0	2	0.010989	1	0.0017094	0	0	0	0	0	0	1	0.00194553	1	0.00268817	0	0	1	0.00205339	0	0	2	0.0034188	2	0.0108696	1	0.00202429	1	0.00392157	0	0	5	0.0113636	0	0	0	0	0
ARHGEF19	0	0	3	0.00729927	0	0	0	0	0	0	0	0	1	0.00549451	1	0.0017094	0	0	0	0	0	0	0	0	2	0.00537634	3	0.00530035	0	0	0	0	11	0.0188034	1	0.00543478	1	0.00202429	5	0.0196078	3	0.00678733	6	0.0136364	0	0	0	0	0
AXL	1	0.0114943	3	0.00729927	0	0	0	0	0	0	1	0.0016835	1	0.00549451	0	0	0	0	0	0	0	0	0	0	0	0	0	0	0	0	0	0	0	0	0	0	0	0	11	0.0431373	0	0	0	0	0	0	0	0	0
B4GALT1	1	0.0114943	5	0.0121655	5	0.00461255	1	0.003367	0	0	1	0.0016835	2	0.010989	3	0.00512821	9	0.0172084	0	0	0	0	0	0	1	0.00268817	1	0.00176678	21	0.0431211	0	0	7	0.0119658	4	0.0217391	2	0.00404858	5	0.0196078	2	0.00452489	12	0.0272727	1	0.00671141	0	0	0
BLK	1	0.0114943	0	0	1	0.000922509	0	0	0	0	1	0.0016835	14	0.0769231	0	0	0	0	0	0	0	0	0	0	0	0	1	0.00176678	1	0.00205339	1	0.0114943	1	0.0017094	6	0.0326087	3	0.00607287	4	0.0156863	2	0.00452489	27	0.0613636	0	0	0	0	1
BLOC1S3	1	0.0114943	7	0.0170316	5	0.00461255	6	0.020202	0	0	1	0.0016835	0	0	1	0.0017094	2	0.00382409	0	0	0	0	2	0.00389105	4	0.0107527	3	0.00530035	8	0.0164271	1	0.0114943	8	0.0136752	4	0.0217391	1	0.00202429	3	0.0117647	0	0	5	0.0113636	0	0	0	0	0
BLOC1S4	1	0.0114943	5	0.0121655	0	0	0	0	0	0	1	0.0016835	1	0.00549451	0	0	1	0.00191205	0	0	0	0	0	0	0	0	5	0.00883392	2	0.00410678	0	0	17	0.0290598	1	0.00543478	2	0.00404858	2	0.00784314	4	0.00904977	2	0.00454545	0	0	1	0.00200401	0
BLOC1S6	0	0	0	0	1	0.000922509	0	0	0	0	0	0	0	0	1	0.0017094	0	0	0	0	0	0	0	0	1	0.00268817	0	0	1	0.00205339	1	0.0114943	1	0.0017094	0	0	2	0.00404858	1	0.00392157	0	0	0	0	0	0	0	0	0
BNC1	0	0	1	0.00243309	8	0.00738007	5	0.016835	0	0	0	0	1	0.00549451	0	0	1	0.00191205	0	0	0	0	1	0.00194553	1	0.00268817	2	0.00353357	3	0.00616016	4	0.045977	14	0.0239316	3	0.0163043	0	0	7	0.027451	5	0.0113122	5	0.0113636	0	0	0	0	0
C1GALT1C1	0	0	1	0.00243309	4	0.00369004	1	0.003367	0	0	1	0.0016835	2	0.010989	0	0	6	0.0114723	0	0	7	0.0136719	4	0.0077821	1	0.00268817	5	0.00883392	1	0.00205339	0	0	3	0.00512821	1	0.00543478	1	0.00202429	1	0.00392157	1	0.00226244	4	0.00909091	0	0	1	0.00200401	0
C1QTNF1	0	0	4	0.00973236	33	0.0304428	1	0.003367	0	0	5	0.00841751	2	0.010989	1	0.0017094	2	0.00382409	0	0	1	0.00195312	7	0.0136187	14	0.0376344	10	0.0176678	8	0.0164271	3	0.0344828	18	0.0307692	1	0.00543478	1	0.00202429	6	0.0235294	12	0.0271493	5	0.0113636	0	0	1	0.00200401	1
C3	0	0	2	0.00486618	2	0.00184502	1	0.003367	0	0	0	0	0	0	1	0.0017094	0	0	0	0	1	0.00195312	10	0.0194553	1	0.00268817	0	0	1	0.00205339	1	0.0114943	1	0.0017094	0	0	0	0	11	0.0431373	1	0.00226244	1	0.00227273	0	0	0	0	0
C9	4	0.045977	25	0.0608273	2	0.00184502	16	0.0538721	0	0	3	0.00505051	15	0.0824176	0	0	17	0.0325048	0	0	2	0.00390625	1	0.00194553	3	0.00806452	32	0.0565371	40	0.0821355	0	0	26	0.0444444	1	0.00543478	2	0.00404858	11	0.0431373	6	0.0135747	26	0.0590909	0	0	0	0	0
CADM4	1	0.0114943	5	0.0121655	4	0.00369004	7	0.023569	0	0	2	0.003367	2	0.010989	2	0.0034188	2	0.00382409	0	0	0	0	2	0.00389105	1	0.00268817	3	0.00530035	6	0.0123203	1	0.0114943	15	0.025641	4	0.0217391	1	0.00202429	4	0.0156863	0	0	5	0.0113636	0	0	0	0	0
CARMIL2	2	0.0229885	8	0.0194647	1	0.000922509	0	0	0	0	0	0	3	0.0164835	0	0	1	0.00191205	0	0	0	0	0	0	0	0	1	0.00176678	1	0.00205339	1	0.0114943	0	0	0	0	1	0.00202429	1	0.00392157	1	0.00226244	1	0.00227273	1	0.00671141	0	0	0
CASK	1	0.0114943	1	0.00243309	1	0.000922509	2	0.00673401	0	0	3	0.00505051	1	0.00549451	3	0.00512821	1	0.00191205	0	0	1	0.00195312	1	0.00194553	4	0.0107527	4	0.00706714	1	0.00205339	0	0	4	0.00683761	0	0	1	0.00202429	6	0.0235294	0	0	4	0.00909091	0	0	1	0.00200401	0
CAV1	0	0	7	0.0170316	1	0.000922509	1	0.003367	0	0	0	0	6	0.032967	3	0.00512821	3	0.00573614	1	0.0153846	3	0.00585938	0	0	8	0.0215054	8	0.0141343	6	0.0123203	0	0	17	0.0290598	0	0	3	0.00607287	3	0.0117647	5	0.0113122	11	0.025	0	0	0	0	0
CAV3	0	0	30	0.0729927	5	0.00461255	1	0.003367	0	0	0	0	1	0.00549451	1	0.0017094	1	0.00191205	0	0	0	0	4	0.0077821	1	0.00268817	1	0.00176678	0	0	1	0.0114943	8	0.0136752	0	0	2	0.00404858	6	0.0235294	2	0.00452489	4	0.00909091	0	0	0	0	0
CCL2	0	0	11	0.026764	6	0.00553506	1	0.003367	2	0.0555556	4	0.00673401	3	0.0164835	0	0	2	0.00382409	0	0	1	0.00195312	0	0	4	0.0107527	2	0.00353357	1	0.00205339	0	0	2	0.0034188	3	0.0163043	1	0.00202429	0	0	3	0.00678733	10	0.0227273	0	0	1	0.00200401	1
CCM2L	2	0.0229885	20	0.0486618	2	0.00184502	12	0.040404	0	0	27	0.0454545	5	0.0274725	1	0.0017094	14	0.0267686	0	0	0	0	0	0	1	0.00268817	7	0.0123675	18	0.036961	0	0	23	0.0393162	1	0.00543478	4	0.00809717	4	0.0156863	5	0.0113122	10	0.0227273	4	0.0268456	0	0	0
CCN1	1	0.0114943	3	0.00729927	5	0.00461255	1	0.003367	0	0	0	0	0	0	0	0	0	0	0	0	0	0	1	0.00194553	1	0.00268817	3	0.00530035	1	0.00205339	0	0	6	0.0102564	0	0	2	0.00404858	3	0.0117647	4	0.00904977	0	0	0	0	0	0	0
CCN4	1	0.0114943	18	0.0437956	48	0.0442804	7	0.023569	0	0	11	0.0185185	20	0.10989	6	0.0102564	33	0.0630975	1	0.0153846	3	0.00585938	16	0.0311284	38	0.102151	25	0.0441696	19	0.0390144	1	0.0114943	117	0.2	18	0.0978261	34	0.0688259	4	0.0156863	14	0.0316742	20	0.0454545	1	0.00671141	0	0	0
CCR2	0	0	4	0.00973236	0	0	0	0	0	0	0	0	0	0	0	0	0	0	1	0.0153846	0	0	0	0	0	0	0	0	0	0	0	0	2	0.0034188	0	0	1	0.00202429	0	0	1	0.00226244	1	0.00227273	0	0	0	0	0
CD109	0	0	6	0.0145985	5	0.00461255	1	0.003367	0	0	4	0.00673401	3	0.0164835	8	0.0136752	7	0.0133843	0	0	0	0	21	0.040856	2	0.00537634	6	0.0106007	12	0.0246407	1	0.0114943	36	0.0615385	5	0.0271739	0	0	3	0.0117647	4	0.00904977	4	0.00909091	10	0.0671141	0	0	1
CD151	0	0	2	0.00486618	34	0.0313653	2	0.00673401	2	0.0555556	4	0.00673401	2	0.010989	3	0.00512821	1	0.00191205	0	0	1	0.00195312	0	0	23	0.061828	14	0.024735	9	0.0184805	0	0	7	0.0119658	3	0.0163043	1	0.00202429	2	0.00784314	9	0.020362	4	0.00909091	0	0	1	0.00200401	3
CD34	0	0	5	0.0121655	2	0.00184502	1	0.003367	1	0.0277778	2	0.003367	4	0.021978	10	0.017094	7	0.0133843	0	0	2	0.00390625	1	0.00194553	5	0.0134409	3	0.00530035	7	0.0143737	0	0	9	0.0153846	2	0.0108696	4	0.00809717	2	0.00784314	2	0.00452489	7	0.0159091	2	0.0134228	1	0.00200401	0
CD36	1	0.0114943	4	0.00973236	5	0.00461255	4	0.013468	0	0	1	0.0016835	2	0.010989	3	0.00512821	6	0.0114723	1	0.0153846	7	0.0136719	7	0.0136187	0	0	7	0.0123675	2	0.00410678	1	0.0114943	10	0.017094	2	0.0108696	2	0.00404858	0	0	2	0.00452489	8	0.0181818	0	0	1	0.00200401	0
CD40LG	0	0	10	0.0243309	12	0.0110701	5	0.016835	0	0	1	0.0016835	10	0.0549451	2	0.0034188	12	0.0229446	0	0	1	0.00195312	0	0	1	0.00268817	4	0.00706714	7	0.0143737	1	0.0114943	11	0.0188034	2	0.0108696	1	0.00202429	3	0.0117647	4	0.00904977	17	0.0386364	0	0	2	0.00400802	0
CD44	0	0	2	0.00486618	3	0.00276753	1	0.003367	0	0	0	0	3	0.0164835	0	0	1	0.00191205	0	0	0	0	0	0	3	0.00806452	3	0.00530035	6	0.0123203	1	0.0114943	3	0.00512821	2	0.0108696	1	0.00202429	1	0.00392157	4	0.00904977	5	0.0113636	0	0	0	0	0
CD9	0	0	0	0	3	0.00276753	0	0	0	0	0	0	1	0.00549451	1	0.0017094	1	0.00191205	0	0	0	0	2	0.00389105	1	0.00268817	1	0.00176678	0	0	0	0	1	0.0017094	0	0	0	0	1	0.00392157	1	0.00226244	2	0.00454545	0	0	0	0	0
CDKN1A	0	0	3	0.00729927	5	0.00461255	0	0	1	0.0277778	1	0.0016835	3	0.0164835	2	0.0034188	2	0.00382409	0	0	0	0	2	0.00389105	5	0.0134409	4	0.00706714	3	0.00616016	0	0	21	0.0358974	0	0	0	0	2	0.00784314	12	0.0271493	5	0.0113636	0	0	0	0	0
CEACAM1	1	0.0114943	5	0.0121655	3	0.00276753	4	0.013468	0	0	2	0.003367	1	0.00549451	3	0.00512821	1	0.00191205	0	0	0	0	1	0.00194553	2	0.00537634	2	0.00353357	9	0.0184805	2	0.0229885	12	0.0205128	2	0.0108696	0	0	5	0.0196078	0	0	3	0.00681818	0	0	0	0	0
CELA2A	0	0	4	0.00973236	0	0	0	0	0	0	0	0	3	0.0164835	1	0.0017094	0	0	0	0	0	0	0	0	2	0.00537634	3	0.00530035	0	0	0	0	9	0.0153846	1	0.00543478	2	0.00404858	5	0.0196078	3	0.00678733	4	0.00909091	0	0	0	0	0
CELSR1	0	0	0	0	0	0	2	0.00673401	0	0	0	0	2	0.010989	1	0.0017094	2	0.00382409	0	0	0	0	2	0.00389105	1	0.00268817	1	0.00176678	1	0.00205339	0	0	1	0.0017094	0	0	0	0	2	0.00784314	8	0.0180995	0	0	0	0	0	0	0
CFH	1	0.0114943	7	0.0170316	27	0.0249077	2	0.00673401	3	0.0833333	4	0.00673401	0	0	2	0.0034188	2	0.00382409	0	0	0	0	0	0	26	0.0698925	12	0.0212014	6	0.0123203	1	0.0114943	12	0.0205128	3	0.0163043	2	0.00404858	5	0.0196078	9	0.020362	3	0.00681818	0	0	1	0.00200401	2
CFLAR	0	0	1	0.00243309	0	0	4	0.013468	0	0	0	0	2	0.010989	0	0	8	0.0152964	0	0	3	0.00585938	0	0	2	0.00537634	3	0.00530035	10	0.0205339	0	0	8	0.0136752	3	0.0163043	1	0.00202429	4	0.0156863	0	0	6	0.0136364	0	0	0	0	0
CLASP1	0	0	2	0.00486618	0	0	0	0	0	0	0	0	10	0.0549451	0	0	5	0.00956023	0	0	0	0	0	0	0	0	5	0.00883392	8	0.0164271	0	0	5	0.00854701	0	0	1	0.00202429	6	0.0235294	2	0.00452489	1	0.00227273	0	0	0	0	0
CLASP2	0	0	9	0.0218978	1	0.000922509	1	0.003367	0	0	0	0	1	0.00549451	0	0	0	0	1	0.0153846	0	0	3	0.00583658	1	0.00268817	0	0	1	0.00205339	0	0	5	0.00854701	1	0.00543478	1	0.00202429	2	0.00784314	3	0.00678733	3	0.00681818	0	0	0	0	0
CLDN1	0	0	13	0.0316302	5	0.00461255	41	0.138047	0	0	0	0	32	0.175824	6	0.0102564	53	0.101338	0	0	6	0.0117188	2	0.00389105	5	0.0134409	9	0.0159011	123	0.252567	0	0	68	0.116239	3	0.0163043	5	0.0101215	4	0.0156863	1	0.00226244	19	0.0431818	3	0.0201342	0	0	1
CLDN19	0	0	3	0.00729927	2	0.00184502	2	0.00673401	0	0	2	0.003367	4	0.021978	9	0.0153846	4	0.00764818	0	0	2	0.00390625	2	0.00389105	5	0.0134409	3	0.00530035	5	0.0102669	0	0	10	0.017094	2	0.0108696	5	0.0101215	2	0.00784314	2	0.00452489	9	0.0204545	3	0.0201342	0	0	0
CLDN3	2	0.0229885	3	0.00729927	1	0.000922509	2	0.00673401	0	0	2	0.003367	4	0.021978	9	0.0153846	4	0.00764818	0	0	2	0.00390625	2	0.00389105	4	0.0107527	4	0.00706714	5	0.0102669	0	0	12	0.0205128	2	0.0108696	5	0.0101215	2	0.00784314	2	0.00452489	9	0.0204545	3	0.0201342	0	0	0
CLDN4	2	0.0229885	16	0.0389294	4	0.00369004	2	0.00673401	0	0	2	0.003367	3	0.0164835	1	0.0017094	2	0.00382409	0	0	0	0	0	0	1	0.00268817	5	0.00883392	4	0.00821355	1	0.0114943	30	0.0512821	0	0	0	0	5	0.0196078	2	0.00452489	4	0.00909091	0	0	0	0	0
CLEC10A	0	0	2	0.00486618	0	0	1	0.003367	0	0	0	0	0	0	0	0	0	0	0	0	0	0	1	0.00194553	0	0	0	0	0	0	0	0	6	0.0102564	1	0.00543478	0	0	2	0.00784314	2	0.00452489	1	0.00227273	0	0	0	0	0
CNN2	3	0.0344828	1	0.00243309	0	0	1	0.003367	1	0.0277778	0	0	1	0.00549451	6	0.0102564	0	0	0	0	0	0	16	0.0311284	0	0	2	0.00353357	1	0.00205339	1	0.0114943	2	0.0034188	1	0.00543478	1	0.00202429	13	0.0509804	0	0	3	0.00681818	0	0	0	0	1
COL1A1	0	0	5	0.0121655	35	0.0322878	1	0.003367	0	0	3	0.00505051	4	0.021978	1	0.0017094	0	0	0	0	1	0.00195312	0	0	4	0.0107527	1	0.00176678	1	0.00205339	4	0.045977	6	0.0102564	5	0.0271739	2	0.00404858	1	0.00392157	3	0.00678733	5	0.0113636	0	0	1	0.00200401	1
COL3A1	0	0	5	0.0121655	1	0.000922509	2	0.00673401	0	0	0	0	1	0.00549451	0	0	7	0.0133843	0	0	3	0.00585938	0	0	3	0.00806452	3	0.00530035	5	0.0102669	0	0	15	0.025641	0	0	1	0.00202429	2	0.00784314	1	0.00226244	2	0.00454545	0	0	0	0	0
COL5A1	2	0.0229885	1	0.00243309	1	0.000922509	0	0	0	0	1	0.0016835	2	0.010989	3	0.00512821	4	0.00764818	1	0.0153846	0	0	6	0.0116732	3	0.00806452	1	0.00176678	2	0.00410678	0	0	5	0.00854701	0	0	7	0.01417	4	0.0156863	0	0	2	0.00454545	0	0	1	0.00200401	0
COMP	2	0.0229885	0	0	5	0.00461255	1	0.003367	1	0.0277778	0	0	3	0.0164835	1	0.0017094	1	0.00191205	0	0	0	0	5	0.00972763	8	0.0215054	1	0.00176678	1	0.00205339	2	0.0229885	26	0.0444444	1	0.00543478	1	0.00202429	2	0.00784314	4	0.00904977	2	0.00454545	0	0	0	0	1
CORO1B	2	0.0229885	12	0.0291971	23	0.0212177	5	0.016835	2	0.0555556	0	0	10	0.0549451	1	0.0017094	22	0.042065	0	0	0	0	2	0.00389105	9	0.0241935	5	0.00883392	4	0.00821355	0	0	15	0.025641	1	0.00543478	10	0.0202429	3	0.0117647	9	0.020362	12	0.0272727	0	0	0	0	0
CPB2	1	0.0114943	1	0.00243309	1	0.000922509	0	0	0	0	14	0.023569	1	0.00549451	0	0	0	0	0	0	1	0.00195312	0	0	0	0	0	0	0	0	0	0	3	0.00512821	0	0	0	0	0	0	0	0	9	0.0204545	0	0	0	0	0
CRK	0	0	3	0.00729927	0	0	0	0	0	0	1	0.0016835	1	0.00549451	0	0	0	0	0	0	1	0.00195312	2	0.00389105	2	0.00537634	0	0	0	0	0	0	16	0.0273504	0	0	1	0.00202429	6	0.0235294	3	0.00678733	1	0.00227273	0	0	0	0	0
CRP	2	0.0229885	38	0.0924574	37	0.0341328	6	0.020202	5	0.138889	3	0.00505051	7	0.0384615	1	0.0017094	5	0.00956023	0	0	1	0.00195312	2	0.00389105	37	0.0994624	28	0.04947	18	0.036961	1	0.0114943	12	0.0205128	6	0.0326087	2	0.00404858	12	0.0470588	10	0.0226244	5	0.0113636	0	0	0	0	2
CX3CL1	0	0	1	0.00243309	1	0.000922509	0	0	0	0	1	0.0016835	1	0.00549451	0	0	1	0.00191205	0	0	0	0	1	0.00194553	0	0	2	0.00353357	0	0	0	0	4	0.00683761	1	0.00543478	1	0.00202429	1	0.00392157	0	0	1	0.00227273	1	0.00671141	0	0	0
CXADR	1	0.0114943	3	0.00729927	1	0.000922509	1	0.003367	0	0	0	0	2	0.010989	5	0.00854701	5	0.00956023	0	0	0	0	0	0	0	0	4	0.00706714	6	0.0123203	0	0	5	0.00854701	0	0	4	0.00809717	6	0.0235294	3	0.00678733	1	0.00227273	1	0.00671141	0	0	1
CXCR4	0	0	1	0.00243309	0	0	0	0	0	0	0	0	1	0.00549451	0	0	0	0	0	0	0	0	0	0	0	0	0	0	0	0	0	0	0	0	0	0	0	0	3	0.0117647	0	0	0	0	0	0	0	0	0
DCBLD2	0	0	5	0.0121655	6	0.00553506	13	0.043771	0	0	0	0	6	0.032967	0	0	14	0.0267686	0	0	2	0.00390625	0	0	0	0	1	0.00176678	30	0.0616016	0	0	11	0.0188034	0	0	5	0.0101215	2	0.00784314	2	0.00452489	1	0.00227273	0	0	0	0	1
DDR1	0	0	6	0.0145985	5	0.00461255	4	0.013468	2	0.0555556	3	0.00505051	6	0.032967	0	0	5	0.00956023	0	0	0	0	2	0.00389105	9	0.0241935	5	0.00883392	3	0.00616016	0	0	20	0.034188	3	0.0163043	1	0.00202429	0	0	10	0.0226244	9	0.0204545	0	0	0	0	0
DMTN	1	0.0114943	2	0.00486618	0	0	0	0	0	0	0	0	0	0	0	0	0	0	0	0	0	0	0	0	1	0.00268817	0	0	0	0	0	0	0	0	0	0	0	0	0	0	0	0	2	0.00454545	0	0	0	0	1
DRD5	0	0	4	0.00973236	0	0	1	0.003367	0	0	1	0.0016835	1	0.00549451	0	0	1	0.00191205	0	0	0	0	2	0.00389105	0	0	2	0.00353357	3	0.00616016	0	0	13	0.0222222	0	0	1	0.00202429	2	0.00784314	2	0.00452489	2	0.00454545	0	0	0	0	0
DSP	0	0	10	0.0243309	4	0.00369004	1	0.003367	1	0.0277778	1	0.0016835	1	0.00549451	0	0	2	0.00382409	0	0	0	0	2	0.00389105	10	0.0268817	6	0.0106007	2	0.00410678	2	0.0229885	39	0.0666667	0	0	1	0.00202429	1	0.00392157	16	0.0361991	2	0.00454545	0	0	0	0	0
DST	0	0	3	0.00729927	8	0.00738007	6	0.020202	1	0.0277778	0	0	7	0.0384615	1	0.0017094	10	0.0191205	0	0	1	0.00195312	4	0.0077821	10	0.0268817	4	0.00706714	10	0.0205339	1	0.0114943	10	0.017094	3	0.0163043	1	0.00202429	3	0.0117647	14	0.0316742	9	0.0204545	0	0	0	0	0
DTNBP1	0	0	17	0.0413625	8	0.00738007	2	0.00673401	1	0.0277778	0	0	0	0	1	0.0017094	2	0.00382409	0	0	0	0	2	0.00389105	7	0.0188172	4	0.00706714	3	0.00616016	1	0.0114943	40	0.0683761	2	0.0108696	0	0	0	0	12	0.0271493	2	0.00454545	0	0	0	0	0
DUOX1	0	0	0	0	1	0.000922509	0	0	0	0	0	0	0	0	1	0.0017094	0	0	0	0	0	0	0	0	1	0.00268817	0	0	0	0	1	0.0114943	1	0.0017094	0	0	2	0.00404858	1	0.00392157	1	0.00226244	2	0.00454545	0	0	0	0	0
DUOX2	0	0	0	0	1	0.000922509	0	0	0	0	0	0	0	0	1	0.0017094	0	0	0	0	0	0	0	0	1	0.00268817	0	0	0	0	1	0.0114943	1	0.0017094	0	0	2	0.00404858	1	0.00392157	1	0.00226244	2	0.00454545	0	0	0	0	0
DUSP10	0	0	1	0.00243309	35	0.0322878	2	0.00673401	2	0.0555556	3	0.00505051	2	0.010989	1	0.0017094	2	0.00382409	0	0	1	0.00195312	0	0	22	0.0591398	13	0.0229682	8	0.0164271	0	0	10	0.017094	3	0.0163043	0	0	2	0.00784314	7	0.0158371	6	0.0136364	0	0	1	0.00200401	4
DYSF	0	0	10	0.0243309	0	0	0	0	0	0	0	0	2	0.010989	1	0.0017094	1	0.00191205	0	0	0	0	0	0	0	0	2	0.00353357	5	0.0102669	0	0	6	0.0102564	0	0	0	0	2	0.00784314	1	0.00226244	1	0.00227273	0	0	0	0	0
EGFR	1	0.0114943	19	0.0462287	0	0	0	0	1	0.0277778	3	0.00505051	22	0.120879	0	0	0	0	0	0	0	0	0	0	0	0	0	0	0	0	0	0	0	0	0	0	0	0	5	0.0196078	0	0	0	0	0	0	0	0	0
ELK3	0	0	4	0.00973236	1	0.000922509	0	0	0	0	0	0	2	0.010989	1	0.0017094	1	0.00191205	0	0	0	0	0	0	0	0	0	0	0	0	1	0.0114943	2	0.0034188	0	0	6	0.0121457	20	0.0784314	2	0.00452489	3	0.00681818	0	0	0	0	0
ENG	2	0.0229885	1	0.00243309	4	0.00369004	0	0	0	0	0	0	3	0.0164835	5	0.00854701	3	0.00573614	1	0.0153846	0	0	6	0.0116732	2	0.00537634	0	0	1	0.00205339	0	0	6	0.0102564	0	0	8	0.0161943	1	0.00392157	2	0.00452489	4	0.00909091	0	0	1	0.00200401	0
ENPP4	0	0	3	0.00729927	8	0.00738007	1	0.003367	1	0.0277778	2	0.003367	7	0.0384615	0	0	3	0.00573614	0	0	1	0.00195312	2	0.00389105	10	0.0268817	7	0.0123675	6	0.0123203	1	0.0114943	17	0.0290598	3	0.0163043	0	0	5	0.0196078	11	0.0248869	13	0.0295455	0	0	0	0	0
ENTPD1	0	0	1	0.00243309	0	0	0	0	0	0	0	0	0	0	2	0.0034188	0	0	0	0	0	0	1	0.00194553	2	0.00537634	0	0	1	0.00205339	0	0	3	0.00512821	0	0	1	0.00202429	0	0	0	0	0	0	0	0	0	0	0
ENTPD2	2	0.0229885	3	0.00729927	1	0.000922509	0	0	0	0	3	0.00505051	8	0.043956	4	0.00683761	4	0.00764818	1	0.0153846	1	0.00195312	7	0.0136187	4	0.0107527	1	0.00176678	3	0.00616016	0	0	13	0.0222222	1	0.00543478	6	0.0121457	3	0.0117647	1	0.00226244	5	0.0113636	0	0	1	0.00200401	0
EPB41L4B	2	0.0229885	4	0.00973236	2	0.00184502	1	0.003367	0	0	0	0	2	0.010989	3	0.00512821	4	0.00764818	0	0	0	0	3	0.00583658	0	0	1	0.00176678	0	0	0	0	1	0.0017094	0	0	5	0.0101215	5	0.0196078	0	0	1	0.00227273	0	0	0	0	0
EPHB2	0	0	4	0.00973236	0	0	0	0	0	0	0	0	1	0.00549451	3	0.00512821	0	0	0	0	0	0	2	0.00389105	1	0.00268817	2	0.00353357	1	0.00205339	0	0	5	0.00854701	2	0.0108696	0	0	4	0.0156863	5	0.0113122	3	0.00681818	0	0	0	0	0
EPPK1	1	0.0114943	13	0.0316302	45	0.0415129	8	0.026936	0	0	11	0.0185185	18	0.0989011	7	0.0119658	35	0.0669216	0	0	3	0.00585938	15	0.0291829	35	0.094086	23	0.040636	23	0.0472279	1	0.0114943	120	0.205128	16	0.0869565	30	0.0607287	7	0.027451	15	0.0339367	22	0.05	1	0.00671141	0	0	0
ERBB2	0	0	22	0.053528	0	0	0	0	0	0	13	0.0218855	28	0.153846	0	0	0	0	0	0	0	0	0	0	0	0	0	0	0	0	0	0	0	0	0	0	0	0	0	0	0	0	0	0	0	0	0	0	0
EVL	2	0.0229885	1	0.00243309	1	0.000922509	3	0.010101	0	0	0	0	0	0	1	0.0017094	4	0.00764818	1	0.0153846	0	0	0	0	0	0	1	0.00176678	11	0.0225873	0	0	8	0.0136752	0	0	2	0.00404858	2	0.00784314	0	0	1	0.00227273	0	0	0	0	0
EVPL	1	0.0114943	11	0.026764	38	0.0350554	8	0.026936	0	0	4	0.00673401	4	0.021978	1	0.0017094	2	0.00382409	0	0	1	0.00195312	10	0.0194553	13	0.0349462	9	0.0159011	9	0.0184805	3	0.0344828	14	0.0239316	1	0.00543478	3	0.00607287	5	0.0196078	10	0.0226244	3	0.00681818	0	0	1	0.00200401	1
EXT1	0	0	23	0.0559611	57	0.052583	5	0.016835	0	0	12	0.020202	18	0.0989011	3	0.00512821	25	0.0478011	1	0.0153846	3	0.00585938	17	0.0330739	41	0.110215	18	0.0318021	14	0.0287474	0	0	104	0.177778	15	0.0815217	32	0.0647773	10	0.0392157	13	0.0294118	25	0.0568182	1	0.00671141	0	0	0
F10	1	0.0114943	3	0.00729927	5	0.00461255	2	0.00673401	0	0	0	0	2	0.010989	0	0	6	0.0114723	0	0	0	0	0	0	0	0	4	0.00706714	3	0.00616016	0	0	5	0.00854701	2	0.0108696	0	0	2	0.00784314	2	0.00452489	5	0.0113636	0	0	0	0	0
F11	0	0	1	0.00243309	0	0	0	0	0	0	0	0	0	0	0	0	0	0	0	0	1	0.00195312	0	0	0	0	0	0	0	0	0	0	2	0.0034188	0	0	0	0	0	0	1	0.00226244	1	0.00227273	0	0	0	0	0
F11R	2	0.0229885	1	0.00243309	0	0	0	0	0	0	0	0	0	0	0	0	0	0	0	0	1	0.00195312	0	0	0	0	0	0	0	0	0	0	2	0.0034188	0	0	0	0	0	0	1	0.00226244	1	0.00227273	0	0	0	0	0
F12	6	0.0689655	1	0.00243309	0	0	0	0	0	0	0	0	0	0	0	0	0	0	0	0	1	0.00195312	0	0	0	0	0	0	0	0	0	0	2	0.0034188	0	0	0	0	0	0	1	0.00226244	1	0.00227273	0	0	0	0	0
F13A1	0	0	0	0	5	0.00461255	1	0.003367	0	0	0	0	2	0.010989	2	0.0034188	1	0.00191205	0	0	0	0	5	0.00972763	4	0.0107527	1	0.00176678	2	0.00410678	2	0.0229885	36	0.0615385	0	0	3	0.00607287	4	0.0156863	2	0.00452489	1	0.00227273	0	0	0	0	0
F13B	1	0.0114943	4	0.00973236	3	0.00276753	2	0.00673401	0	0	0	0	0	0	0	0	0	0	0	0	0	0	1	0.00194553	1	0.00268817	2	0.00353357	2	0.00410678	0	0	5	0.00854701	0	0	0	0	3	0.0117647	3	0.00678733	1	0.00227273	0	0	0	0	0
F2	0	0	32	0.0778589	30	0.0276753	3	0.010101	4	0.111111	4	0.00673401	7	0.0384615	0	0	2	0.00382409	0	0	2	0.00390625	0	0	32	0.0860215	17	0.0300353	16	0.0328542	1	0.0114943	8	0.0136752	6	0.0326087	0	0	14	0.054902	7	0.0158371	8	0.0181818	0	0	0	0	2
F2R	3	0.0344828	12	0.0291971	5	0.00461255	2	0.00673401	0	0	11	0.0185185	4	0.021978	1	0.0017094	8	0.0152964	0	0	1	0.00195312	5	0.00972763	10	0.0268817	4	0.00706714	8	0.0164271	1	0.0114943	11	0.0188034	0	0	1	0.00202429	9	0.0352941	3	0.00678733	10	0.0227273	0	0	1	0.00200401	0
F2RL1	3	0.0344828	8	0.0194647	8	0.00738007	10	0.03367	1	0.0277778	2	0.003367	5	0.0274725	4	0.00683761	11	0.0210325	1	0.0153846	9	0.0175781	7	0.0136187	4	0.0107527	16	0.0282686	9	0.0184805	2	0.0229885	19	0.0324786	4	0.0217391	1	0.00202429	4	0.0156863	5	0.0113122	14	0.0318182	0	0	2	0.00400802	1
F2RL2	4	0.045977	4	0.00973236	5	0.00461255	6	0.020202	0	0	1	0.0016835	4	0.021978	2	0.0034188	6	0.0114723	1	0.0153846	7	0.0136719	6	0.0116732	0	0	9	0.0159011	4	0.00821355	1	0.0114943	9	0.0153846	3	0.0163043	1	0.00202429	1	0.00392157	2	0.00452489	9	0.0204545	0	0	1	0.00200401	0
F2RL3	2	0.0229885	12	0.0291971	5	0.00461255	2	0.00673401	0	0	11	0.0185185	4	0.021978	1	0.0017094	8	0.0152964	0	0	1	0.00195312	5	0.00972763	10	0.0268817	4	0.00706714	10	0.0205339	1	0.0114943	11	0.0188034	0	0	1	0.00202429	10	0.0392157	3	0.00678733	10	0.0227273	0	0	1	0.00200401	0
F3	1	0.0114943	0	0	2	0.00184502	0	0	0	0	1	0.0016835	2	0.010989	1	0.0017094	1	0.00191205	0	0	0	0	1	0.00194553	0	0	0	0	2	0.00410678	0	0	4	0.00683761	0	0	2	0.00404858	2	0.00784314	4	0.00904977	0	0	0	0	0	0	0
F5	0	0	68	0.16545	42	0.0387454	6	0.020202	5	0.138889	4	0.00673401	9	0.0494505	0	0	4	0.00764818	0	0	1	0.00195312	2	0.00389105	37	0.0994624	26	0.0459364	21	0.0431211	1	0.0114943	9	0.0153846	6	0.0326087	3	0.00607287	14	0.054902	8	0.0180995	9	0.0204545	0	0	0	0	2
F7	1	0.0114943	1	0.00243309	8	0.00738007	1	0.003367	0	0	0	0	3	0.0164835	0	0	0	0	0	0	38	0.0742188	2	0.00389105	5	0.0134409	5	0.00883392	0	0	0	0	8	0.0136752	3	0.0163043	4	0.00809717	5	0.0196078	4	0.00904977	2	0.00454545	0	0	1	0.00200401	0
F8	1	0.0114943	9	0.0218978	3	0.00276753	4	0.013468	1	0.0277778	0	0	0	0	2	0.0034188	1	0.00191205	0	0	0	0	2	0.00389105	11	0.0295699	5	0.00883392	3	0.00616016	2	0.0229885	38	0.0649573	0	0	1	0.00202429	0	0	15	0.0339367	2	0.00454545	0	0	0	0	0
F9	0	0	7	0.0170316	27	0.0249077	2	0.00673401	3	0.0833333	4	0.00673401	0	0	2	0.0034188	2	0.00382409	0	0	0	0	1	0.00194553	25	0.0672043	12	0.0212014	6	0.0123203	1	0.0114943	12	0.0205128	3	0.0163043	1	0.00202429	5	0.0196078	10	0.0226244	3	0.00681818	0	0	1	0.00200401	2
FBLN1	0	0	2	0.00486618	0	0	2	0.00673401	0	0	0	0	0	0	0	0	1	0.00191205	0	0	0	0	1	0.00194553	1	0.00268817	1	0.00176678	1	0.00205339	0	0	2	0.0034188	1	0.00543478	0	0	1	0.00392157	8	0.0180995	1	0.00227273	0	0	0	0	0
FCER1G	2	0.0229885	66	0.160584	40	0.0369004	6	0.020202	5	0.138889	4	0.00673401	9	0.0494505	0	0	5	0.00956023	0	0	1	0.00195312	2	0.00389105	41	0.110215	26	0.0459364	19	0.0390144	1	0.0114943	9	0.0153846	6	0.0326087	2	0.00404858	12	0.0470588	8	0.0180995	8	0.0181818	0	0	0	0	2
FER1L5	0	0	7	0.0170316	2	0.00184502	0	0	0	0	0	0	1	0.00549451	1	0.0017094	7	0.0133843	0	0	0	0	0	0	1	0.00268817	5	0.00883392	7	0.0143737	0	0	7	0.0119658	0	0	3	0.00607287	2	0.00784314	0	0	2	0.00454545	0	0	0	0	0
FERMT1	1	0.0114943	0	0	2	0.00184502	3	0.010101	0	0	1	0.0016835	4	0.021978	0	0	2	0.00382409	0	0	0	0	1	0.00194553	2	0.00537634	2	0.00353357	6	0.0123203	0	0	17	0.0290598	0	0	2	0.00404858	4	0.0156863	1	0.00226244	3	0.00681818	0	0	0	0	0
FERMT2	0	0	0	0	4	0.00369004	2	0.00673401	0	0	0	0	1	0.00549451	0	0	3	0.00573614	0	0	1	0.00195312	2	0.00389105	1	0.00268817	8	0.0141343	2	0.00410678	0	0	2	0.0034188	0	0	3	0.00607287	3	0.0117647	1	0.00226244	3	0.00681818	0	0	0	0	0
FERMT3	0	0	7	0.0170316	2	0.00184502	1	0.003367	1	0.0277778	0	0	0	0	1	0.0017094	8	0.0152964	0	0	0	0	0	0	0	0	2	0.00353357	1	0.00205339	0	0	3	0.00512821	0	0	0	0	0	0	2	0.00452489	0	0	0	0	0	0	0
FGA	0	0	2	0.00486618	5	0.00461255	0	0	0	0	1	0.0016835	1	0.00549451	1	0.0017094	1	0.00191205	0	0	0	0	0	0	4	0.0107527	2	0.00353357	1	0.00205339	0	0	3	0.00512821	0	0	0	0	4	0.0156863	3	0.00678733	4	0.00909091	0	0	0	0	0
FGB	0	0	2	0.00486618	4	0.00369004	0	0	0	0	1	0.0016835	1	0.00549451	1	0.0017094	1	0.00191205	0	0	0	0	0	0	5	0.0134409	2	0.00353357	1	0.00205339	0	0	3	0.00512821	0	0	0	0	5	0.0196078	3	0.00678733	3	0.00681818	0	0	0	0	0
FGF1	2	0.0229885	3	0.00729927	2	0.00184502	0	0	1	0.0277778	0	0	0	0	0	0	0	0	0	0	31	0.0605469	1	0.00194553	1	0.00268817	2	0.00353357	0	0	0	0	7	0.0119658	2	0.0108696	3	0.00607287	6	0.0235294	1	0.00226244	1	0.00227273	0	0	1	0.00200401	0
FGF10	4	0.045977	3	0.00729927	1	0.000922509	0	0	0	0	0	0	0	0	1	0.0017094	0	0	0	0	1	0.00195312	0	0	0	0	0	0	2	0.00410678	0	0	3	0.00512821	0	0	0	0	3	0.0117647	2	0.00452489	1	0.00227273	0	0	0	0	0
FGF2	0	0	2	0.00486618	2	0.00184502	0	0	0	0	0	0	0	0	0	0	1	0.00191205	1	0.0153846	0	0	0	0	0	0	1	0.00176678	2	0.00410678	2	0.0229885	1	0.0017094	0	0	1	0.00202429	3	0.0117647	1	0.00226244	1	0.00227273	0	0	0	0	0
FGF7	0	0	25	0.0608273	4	0.00369004	13	0.043771	0	0	2	0.003367	14	0.0769231	0	0	19	0.0363289	0	0	3	0.00585938	1	0.00194553	2	0.00537634	27	0.0477032	36	0.073922	0	0	15	0.025641	2	0.0108696	1	0.00202429	8	0.0313725	5	0.0113122	23	0.0522727	0	0	0	0	0
FGFR1OP2	0	0	10	0.0243309	5	0.00461255	3	0.010101	0	0	4	0.00673401	9	0.0494505	7	0.0119658	5	0.00956023	0	0	0	0	8	0.0155642	3	0.00806452	21	0.0371025	16	0.0328542	1	0.0114943	30	0.0512821	7	0.0380435	2	0.00404858	6	0.0235294	3	0.00678733	14	0.0318182	11	0.0738255	0	0	0
FGG	0	0	1	0.00243309	5	0.00461255	0	0	0	0	1	0.0016835	1	0.00549451	1	0.0017094	1	0.00191205	0	0	0	0	0	0	4	0.0107527	2	0.00353357	1	0.00205339	0	0	3	0.00512821	0	0	0	0	4	0.0156863	3	0.00678733	4	0.00909091	0	0	0	0	0
FKBP10	0	0	4	0.00973236	7	0.00645756	2	0.00673401	0	0	3	0.00505051	15	0.0824176	0	0	2	0.00382409	0	0	1	0.00195312	0	0	2	0.00537634	1	0.00176678	2	0.00410678	1	0.0114943	1	0.0017094	4	0.0217391	1	0.00202429	0	0	1	0.00226244	27	0.0613636	0	0	1	0.00200401	1
FLNA	2	0.0229885	9	0.0218978	8	0.00738007	9	0.030303	1	0.0277778	2	0.003367	6	0.032967	5	0.00854701	12	0.0229446	1	0.0153846	9	0.0175781	7	0.0136187	4	0.0107527	13	0.0229682	10	0.0205339	2	0.0229885	17	0.0290598	4	0.0217391	1	0.00202429	5	0.0196078	5	0.0113122	15	0.0340909	0	0	2	0.00400802	1
FN1	0	0	1	0.00243309	0	0	0	0	0	0	0	0	0	0	0	0	0	0	0	0	1	0.00195312	0	0	1	0.00268817	3	0.00530035	0	0	0	0	5	0.00854701	3	0.0163043	1	0.00202429	1	0.00392157	1	0.00226244	2	0.00454545	0	0	0	0	0
FNTB	0	0	0	0	1	0.000922509	1	0.003367	0	0	0	0	0	0	0	0	5	0.00956023	0	0	0	0	0	0	0	0	2	0.00353357	0	0	0	0	1	0.0017094	0	0	2	0.00404858	1	0.00392157	0	0	2	0.00454545	0	0	0	0	0
FOXA2	0	0	1	0.00243309	2	0.00184502	1	0.003367	0	0	8	0.013468	5	0.0274725	1	0.0017094	2	0.00382409	0	0	0	0	0	0	1	0.00268817	6	0.0106007	0	0	0	0	2	0.0034188	3	0.0163043	1	0.00202429	2	0.00784314	1	0.00226244	8	0.0181818	1	0.00671141	0	0	0
FOXC2	0	0	6	0.0145985	3	0.00276753	0	0	0	0	0	0	0	0	0	0	1	0.00191205	2	0.0307692	0	0	0	0	1	0.00268817	0	0	0	0	0	0	3	0.00512821	2	0.0108696	0	0	2	0.00784314	1	0.00226244	3	0.00681818	0	0	0	0	0
FZD6	0	0	43	0.104623	49	0.045203	6	0.020202	0	0	10	0.016835	15	0.0824176	0	0	17	0.0325048	2	0.0307692	4	0.0078125	5	0.00972763	29	0.077957	21	0.0371025	13	0.026694	0	0	57	0.0974359	10	0.0543478	38	0.0769231	7	0.027451	11	0.0248869	19	0.0431818	2	0.0134228	0	0	0
FZD7	0	0	3	0.00729927	1	0.000922509	2	0.00673401	0	0	0	0	2	0.010989	0	0	5	0.00956023	0	0	2	0.00390625	0	0	3	0.00806452	4	0.00706714	9	0.0184805	0	0	5	0.00854701	3	0.0163043	0	0	5	0.0196078	0	0	3	0.00681818	0	0	0	0	0
GAS6	1	0.0114943	11	0.026764	4	0.00369004	2	0.00673401	0	0	12	0.020202	2	0.010989	1	0.0017094	8	0.0152964	0	0	1	0.00195312	4	0.0077821	11	0.0295699	3	0.00530035	8	0.0164271	1	0.0114943	10	0.017094	0	0	1	0.00202429	11	0.0431373	2	0.00452489	10	0.0227273	0	0	0	0	0
GATA1	1	0.0114943	1	0.00243309	1	0.000922509	4	0.013468	0	0	1	0.0016835	1	0.00549451	1	0.0017094	1	0.00191205	0	0	2	0.00390625	1	0.00194553	1	0.00268817	6	0.0106007	1	0.00205339	0	0	26	0.0444444	1	0.00543478	3	0.00607287	2	0.00784314	0	0	1	0.00227273	0	0	1	0.00200401	0
GATA2	0	0	4	0.00973236	3	0.00276753	18	0.0606061	0	0	0	0	5	0.0274725	0	0	11	0.0210325	0	0	2	0.00390625	0	0	1	0.00268817	0	0	27	0.0554415	0	0	13	0.0222222	1	0.00543478	10	0.0202429	2	0.00784314	2	0.00452489	1	0.00227273	0	0	0	0	1
GATA4	1	0.0114943	0	0	1	0.000922509	0	0	0	0	1	0.0016835	14	0.0769231	0	0	0	0	0	0	0	0	0	0	0	0	2	0.00353357	2	0.00410678	1	0.0114943	3	0.00512821	6	0.0326087	2	0.00404858	3	0.0117647	2	0.00452489	29	0.0659091	0	0	0	0	1
GJA1	1	0.0114943	2	0.00486618	5	0.00461255	0	0	0	0	1	0.0016835	3	0.0164835	0	0	2	0.00382409	0	0	0	0	0	0	0	0	4	0.00706714	1	0.00205339	1	0.0114943	4	0.00683761	0	0	0	0	7	0.027451	2	0.00452489	2	0.00454545	0	0	0	0	0
GNA13	1	0.0114943	10	0.0243309	36	0.0332103	4	0.013468	0	0	5	0.00841751	4	0.021978	1	0.0017094	0	0	0	0	1	0.00195312	8	0.0155642	9	0.0241935	8	0.0141343	4	0.00821355	5	0.0574713	6	0.0102564	2	0.0108696	3	0.00607287	3	0.0117647	8	0.0180995	5	0.0113636	0	0	1	0.00200401	2
GNAS	1	0.0114943	1	0.00243309	17	0.0156827	3	0.010101	0	0	24	0.040404	5	0.0274725	0	0	1	0.00191205	0	0	0	0	2	0.00389105	4	0.0107527	21	0.0371025	1	0.00205339	0	0	22	0.0376068	3	0.0163043	3	0.00607287	14	0.054902	5	0.0113122	17	0.0386364	0	0	0	0	0
GP1BA	0	0	3	0.00729927	1	0.000922509	0	0	0	0	0	0	0	0	0	0	1	0.00191205	0	0	0	0	1	0.00194553	0	0	0	0	0	0	0	0	3	0.00512821	0	0	0	0	5	0.0196078	3	0.00678733	0	0	0	0	0	0	0
GP1BB	2	0.0229885	12	0.0291971	2	0.00184502	3	0.010101	0	0	0	0	2	0.010989	2	0.0034188	9	0.0172084	0	0	0	0	1	0.00194553	2	0.00537634	7	0.0123675	15	0.0308008	1	0.0114943	14	0.0239316	0	0	1	0.00202429	10	0.0392157	11	0.0248869	4	0.00909091	2	0.0134228	2	0.00400802	2
GP5	0	0	12	0.0291971	6	0.00553506	43	0.144781	0	0	0	0	31	0.17033	6	0.0102564	52	0.0994264	0	0	6	0.0117188	3	0.00583658	4	0.0107527	10	0.0176678	121	0.24846	0	0	67	0.11453	3	0.0163043	4	0.00809717	2	0.00784314	2	0.00452489	21	0.0477273	1	0.00671141	1	0.00200401	1
GP6	2	0.0229885	13	0.0316302	8	0.00738007	5	0.016835	0	0	1	0.0016835	3	0.0164835	0	0	3	0.00573614	0	0	0	0	1	0.00194553	1	0.00268817	4	0.00706714	7	0.0143737	1	0.0114943	12	0.0205128	3	0.0163043	2	0.00404858	1	0.00392157	0	0	6	0.0136364	0	0	0	0	0
GP9	0	0	3	0.00729927	4	0.00369004	17	0.0572391	0	0	0	0	6	0.032967	0	0	11	0.0210325	0	0	2	0.00390625	0	0	1	0.00268817	0	0	27	0.0554415	0	0	12	0.0205128	1	0.00543478	8	0.0161943	1	0.00392157	2	0.00452489	1	0.00227273	0	0	0	0	1
GPR4	1	0.0114943	7	0.0170316	5	0.00461255	2	0.00673401	0	0	0	0	2	0.010989	1	0.0017094	1	0.00191205	0	0	0	0	0	0	4	0.0107527	3	0.00530035	8	0.0164271	1	0.0114943	7	0.0119658	4	0.0217391	1	0.00202429	2	0.00784314	0	0	3	0.00681818	0	0	0	0	0
GPX1	0	0	0	0	0	0	0	0	0	0	0	0	0	0	0	0	0	0	1	0.0153846	0	0	1	0.00194553	1	0.00268817	0	0	0	0	0	0	2	0.0034188	0	0	1	0.00202429	0	0	1	0.00226244	0	0	0	0	0	0	0
GRHL3	0	0	7	0.0170316	1	0.000922509	0	0	0	0	0	0	1	0.00549451	1	0.0017094	0	0	0	0	0	0	0	0	1	0.00268817	2	0.00353357	0	0	0	0	5	0.00854701	1	0.00543478	1	0.00202429	4	0.0156863	4	0.00904977	3	0.00681818	0	0	0	0	0
HBEGF	3	0.0344828	1	0.00243309	3	0.00276753	0	0	1	0.0277778	0	0	2	0.010989	1	0.0017094	0	0	0	0	31	0.0605469	1	0.00194553	2	0.00537634	2	0.00353357	1	0.00205339	0	0	6	0.0102564	2	0.0108696	3	0.00607287	6	0.0235294	1	0.00226244	1	0.00227273	0	0	2	0.00400802	0
HGFAC	1	0.0114943	6	0.0145985	0	0	0	0	0	0	1	0.0016835	1	0.00549451	0	0	0	0	0	0	0	0	2	0.00389105	0	0	4	0.00706714	0	0	0	0	17	0.0290598	1	0.00543478	1	0.00202429	3	0.0117647	1	0.00226244	2	0.00454545	0	0	1	0.00200401	0
HIF1A	0	0	1	0.00243309	2	0.00184502	1	0.003367	0	0	0	0	1	0.00549451	0	0	4	0.00764818	0	0	0	0	1	0.00194553	0	0	3	0.00530035	0	0	0	0	2	0.0034188	0	0	3	0.00607287	2	0.00784314	0	0	3	0.00681818	0	0	0	0	0
HMGB1	0	0	8	0.0194647	7	0.00645756	0	0	0	0	16	0.026936	5	0.0274725	2	0.0034188	0	0	0	0	0	0	3	0.00583658	2	0.00537634	1	0.00176678	2	0.00410678	0	0	1	0.0017094	1	0.00543478	2	0.00404858	2	0.00784314	2	0.00452489	12	0.0272727	0	0	0	0	0
HMGCR	3	0.0344828	0	0	0	0	0	0	0	0	0	0	0	0	0	0	0	0	0	0	0	0	0	0	1	0.00268817	0	0	0	0	0	0	1	0.0017094	1	0.00543478	2	0.00404858	1	0.00392157	2	0.00452489	2	0.00454545	0	0	0	0	0
HMOX1	1	0.0114943	6	0.0145985	2	0.00184502	1	0.003367	0	0	1	0.0016835	1	0.00549451	0	0	0	0	1	0.0153846	0	0	3	0.00583658	1	0.00268817	3	0.00530035	0	0	0	0	5	0.00854701	1	0.00543478	1	0.00202429	1	0.00392157	7	0.0158371	1	0.00227273	0	0	0	0	0
HNF4A	4	0.045977	12	0.0291971	4	0.00369004	3	0.010101	0	0	26	0.043771	8	0.043956	0	0	3	0.00573614	0	0	0	0	0	0	4	0.0107527	4	0.00706714	4	0.00821355	0	0	12	0.0205128	0	0	3	0.00607287	1	0.00392157	4	0.00904977	22	0.05	0	0	0	0	0
HPS1	0	0	0	0	1	0.000922509	1	0.003367	0	0	0	0	0	0	2	0.0034188	0	0	0	0	0	0	0	0	1	0.00268817	1	0.00176678	1	0.00205339	0	0	0	0	0	0	3	0.00607287	0	0	0	0	0	0	0	0	0	0	0
HPS4	0	0	7	0.0170316	1	0.000922509	0	0	0	0	1	0.0016835	1	0.00549451	0	0	3	0.00573614	0	0	0	0	1	0.00194553	1	0.00268817	1	0.00176678	5	0.0102669	0	0	4	0.00683761	0	0	2	0.00404858	1	0.00392157	5	0.0113122	1	0.00227273	0	0	0	0	0
HPS5	0	0	2	0.00486618	8	0.00738007	0	0	0	0	1	0.0016835	1	0.00549451	0	0	0	0	0	0	0	0	2	0.00389105	2	0.00537634	1	0.00176678	3	0.00616016	0	0	3	0.00512821	0	0	2	0.00404858	3	0.0117647	2	0.00452489	2	0.00454545	0	0	0	0	0
HPS6	0	0	1	0.00243309	1	0.000922509	0	0	0	0	0	0	2	0.010989	2	0.0034188	0	0	0	0	0	0	1	0.00194553	2	0.00537634	1	0.00176678	1	0.00205339	0	0	2	0.0034188	1	0.00543478	2	0.00404858	0	0	0	0	0	0	0	0	0	0	0
HPSE	1	0.0114943	2	0.00486618	1	0.000922509	0	0	0	0	0	0	1	0.00549451	1	0.0017094	0	0	0	0	0	0	0	0	0	0	0	0	1	0.00205339	0	0	0	0	1	0.00543478	1	0.00202429	2	0.00784314	0	0	1	0.00227273	0	0	0	0	0
HRAS	0	0	0	0	0	0	0	0	0	0	0	0	1	0.00549451	0	0	0	0	0	0	0	0	0	0	0	0	0	0	0	0	0	0	0	0	0	0	0	0	2	0.00784314	0	0	0	0	0	0	0	0	0
HRG	0	0	14	0.0340633	5	0.00461255	41	0.138047	0	0	0	0	28	0.153846	9	0.0153846	57	0.108987	0	0	6	0.0117188	1	0.00194553	7	0.0188172	9	0.0159011	130	0.26694	0	0	73	0.124786	3	0.0163043	6	0.0121457	2	0.00784314	2	0.00452489	19	0.0431818	3	0.0201342	0	0	1
IGF1	0	0	5	0.0121655	0	0	0	0	0	0	0	0	1	0.00549451	0	0	1	0.00191205	0	0	0	0	1	0.00194553	0	0	0	0	1	0.00205339	1	0.0114943	7	0.0119658	0	0	5	0.0101215	8	0.0313725	0	0	2	0.00454545	0	0	0	0	0
IL1A	0	0	4	0.00973236	0	0	1	0.003367	0	0	0	0	4	0.021978	0	0	4	0.00764818	0	0	0	0	0	0	1	0.00268817	1	0.00176678	2	0.00410678	0	0	4	0.00683761	0	0	0	0	2	0.00784314	0	0	6	0.0136364	0	0	0	0	0
INSL3	1	0.0114943	0	0	2	0.00184502	1	0.003367	1	0.0277778	1	0.0016835	3	0.0164835	3	0.00512821	2	0.00382409	0	0	0	0	5	0.00972763	4	0.0107527	1	0.00176678	2	0.00410678	2	0.0229885	33	0.0564103	0	0	2	0.00404858	3	0.0117647	4	0.00904977	1	0.00227273	0	0	0	0	0
ITGA2B	0	0	1	0.00243309	3	0.00276753	0	0	0	0	2	0.003367	4	0.021978	0	0	1	0.00191205	0	0	1	0.00195312	0	0	5	0.0134409	2	0.00353357	1	0.00205339	1	0.0114943	1	0.0017094	4	0.0217391	0	0	0	0	1	0.00226244	4	0.00909091	0	0	1	0.00200401	1
ITGB1	0	0	5	0.0121655	3	0.00276753	0	0	0	0	0	0	3	0.0164835	1	0.0017094	3	0.00573614	0	0	0	0	4	0.0077821	4	0.0107527	3	0.00530035	1	0.00205339	0	0	12	0.0205128	0	0	2	0.00404858	0	0	0	0	5	0.0113636	0	0	0	0	0
ITGB3	0	0	4	0.00973236	5	0.00461255	0	0	0	0	2	0.003367	1	0.00549451	0	0	1	0.00191205	0	0	1	0.00195312	0	0	3	0.00806452	2	0.00353357	0	0	2	0.0229885	2	0.0034188	3	0.0163043	3	0.00607287	2	0.00784314	2	0.00452489	3	0.00681818	0	0	2	0.00400802	1
JAML	1	0.0114943	0	0	0	0	0	0	0	0	1	0.0016835	0	0	2	0.0034188	1	0.00191205	1	0.0153846	2	0.00390625	11	0.0214008	1	0.00268817	3	0.00530035	0	0	0	0	5	0.00854701	0	0	2	0.00404858	2	0.00784314	1	0.00226244	6	0.0136364	0	0	0	0	0
KANK1	1	0.0114943	7	0.0170316	7	0.00645756	2	0.00673401	0	0	4	0.00673401	1	0.00549451	1	0.0017094	10	0.0191205	0	0	1	0.00195312	1	0.00194553	2	0.00537634	0	0	2	0.00410678	1	0.0114943	14	0.0239316	1	0.00543478	0	0	4	0.0156863	2	0.00452489	7	0.0159091	0	0	0	0	2
KDR	0	0	9	0.0218978	0	0	0	0	0	0	1	0.0016835	3	0.0164835	0	0	0	0	0	0	0	0	0	0	0	0	0	0	0	0	0	0	0	0	0	0	0	0	7	0.027451	0	0	0	0	0	0	0	0	0
KLKB1	0	0	0	0	2	0.00184502	0	0	0	0	1	0.0016835	2	0.010989	1	0.0017094	1	0.00191205	0	0	0	0	1	0.00194553	0	0	0	0	2	0.00410678	0	0	4	0.00683761	0	0	2	0.00404858	2	0.00784314	4	0.00904977	1	0.00227273	0	0	0	0	0
KNG1	0	0	14	0.0340633	5	0.00461255	41	0.138047	0	0	0	0	28	0.153846	9	0.0153846	57	0.108987	0	0	6	0.0117188	1	0.00194553	9	0.0241935	9	0.0159011	130	0.26694	1	0.0114943	73	0.124786	3	0.0163043	6	0.0121457	2	0.00784314	2	0.00452489	19	0.0431818	3	0.0201342	0	0	1
KRT6A	3	0.0344828	6	0.0145985	5	0.00461255	1	0.003367	1	0.0277778	1	0.0016835	0	0	4	0.00683761	0	0	0	0	0	0	0	0	0	0	6	0.0106007	1	0.00205339	0	0	0	0	0	0	5	0.0101215	5	0.0196078	1	0.00226244	0	0	1	0.00671141	0	0	0
LNPK	0	0	4	0.00973236	0	0	2	0.00673401	0	0	0	0	4	0.021978	0	0	13	0.0248566	0	0	2	0.00390625	0	0	3	0.00806452	3	0.00530035	8	0.0164271	0	0	14	0.0239316	0	0	1	0.00202429	0	0	0	0	2	0.00454545	0	0	1	0.00200401	0
LOX	2	0.0229885	1	0.00243309	2	0.00184502	0	0	0	0	0	0	0	0	0	0	0	0	0	0	16	0.03125	0	0	0	0	1	0.00176678	0	0	0	0	7	0.0119658	0	0	1	0.00202429	1	0.00392157	2	0.00452489	0	0	0	0	0	0	0
LYN	0	0	8	0.0194647	27	0.0249077	2	0.00673401	0	0	8	0.013468	3	0.0164835	0	0	9	0.0172084	0	0	2	0.00390625	1	0.00194553	19	0.0510753	14	0.024735	8	0.0164271	0	0	23	0.0393162	5	0.0271739	24	0.048583	7	0.027451	7	0.0158371	9	0.0204545	3	0.0201342	0	0	0
LYST	0	0	5	0.0121655	39	0.0359779	2	0.00673401	2	0.0555556	3	0.00505051	3	0.0164835	0	0	2	0.00382409	0	0	1	0.00195312	0	0	25	0.0672043	12	0.0212014	9	0.0184805	0	0	26	0.0444444	3	0.0163043	1	0.00202429	3	0.0117647	11	0.0248869	13	0.0295455	0	0	1	0.00200401	3
MACF1	0	0	23	0.0559611	4	0.00369004	2	0.00673401	0	0	2	0.003367	7	0.0384615	2	0.0034188	3	0.00573614	0	0	0	0	0	0	0	0	6	0.0106007	9	0.0184805	1	0.0114943	46	0.0786325	0	0	1	0.00202429	3	0.0117647	1	0.00226244	8	0.0181818	0	0	0	0	0
MAP3K1	3	0.0344828	2	0.00486618	0	0	0	0	0	0	1	0.0016835	0	0	0	0	2	0.00382409	1	0.0153846	1	0.00195312	0	0	1	0.00268817	4	0.00706714	1	0.00205339	0	0	1	0.0017094	0	0	0	0	3	0.0117647	1	0.00226244	0	0	0	0	0	0	0
MERTK	0	0	4	0.00973236	0	0	1	0.003367	0	0	0	0	5	0.0274725	0	0	3	0.00573614	0	0	0	0	0	0	1	0.00268817	1	0.00176678	2	0.00410678	0	0	3	0.00512821	0	0	0	0	3	0.0117647	0	0	5	0.0113636	0	0	0	0	0
MIA3	0	0	2	0.00486618	38	0.0350554	2	0.00673401	2	0.0555556	3	0.00505051	2	0.010989	1	0.0017094	2	0.00382409	0	0	1	0.00195312	0	0	20	0.0537634	14	0.024735	8	0.0164271	0	0	12	0.0205128	3	0.0163043	1	0.00202429	2	0.00784314	8	0.0180995	7	0.0159091	0	0	1	0.00200401	4
MMP12	0	0	14	0.0340633	1	0.000922509	23	0.0774411	0	0	0	0	7	0.0384615	2	0.0034188	20	0.0382409	0	0	2	0.00390625	2	0.00389105	2	0.00537634	8	0.0141343	4	0.00821355	0	0	19	0.0324786	1	0.00543478	0	0	6	0.0235294	6	0.0135747	6	0.0136364	0	0	0	0	0
MMRN1	0	0	7	0.0170316	2	0.00184502	0	0	0	0	0	0	2	0.010989	1	0.0017094	1	0.00191205	0	0	0	0	0	0	1	0.00268817	0	0	2	0.00410678	0	0	1	0.0017094	0	0	7	0.01417	2	0.00784314	0	0	1	0.00227273	0	0	0	0	0
MPIG6B	0	0	5	0.0121655	5	0.00461255	4	0.013468	1	0.0277778	3	0.00505051	5	0.0274725	0	0	4	0.00764818	0	0	0	0	2	0.00389105	8	0.0215054	6	0.0106007	2	0.00410678	0	0	19	0.0324786	4	0.0217391	1	0.00202429	1	0.00392157	11	0.0248869	8	0.0181818	0	0	0	0	0
MRTFA	0	0	0	0	0	0	2	0.00673401	1	0.0277778	0	0	0	0	0	0	1	0.00191205	0	0	0	0	2	0.00389105	2	0.00537634	2	0.00353357	2	0.00410678	0	0	5	0.00854701	3	0.0163043	0	0	1	0.00392157	13	0.0294118	2	0.00454545	0	0	0	0	0
MSX2	3	0.0344828	2	0.00486618	5	0.00461255	1	0.003367	0	0	0	0	1	0.00549451	0	0	0	0	0	0	37	0.0722656	2	0.00389105	1	0.00268817	4	0.00706714	0	0	0	0	4	0.00683761	2	0.0108696	4	0.00809717	7	0.027451	2	0.00452489	2	0.00454545	0	0	1	0.00200401	0
MTOR	1	0.0114943	3	0.00729927	0	0	0	0	0	0	0	0	3	0.0164835	3	0.00512821	0	0	0	0	0	0	0	0	3	0.00806452	2	0.00353357	0	0	0	0	12	0.0205128	2	0.0108696	1	0.00202429	6	0.0235294	4	0.00904977	6	0.0136364	0	0	0	0	0
MUC16	0	0	4	0.00973236	4	0.00369004	5	0.016835	0	0	0	0	1	0.00549451	4	0.00683761	2	0.00382409	0	0	0	0	10	0.0194553	0	0	1	0.00176678	4	0.00821355	2	0.0229885	16	0.0273504	1	0.00543478	1	0.00202429	12	0.0470588	1	0.00226244	2	0.00454545	0	0	0	0	0
MUSTN1	1	0.0114943	1	0.00243309	0	0	0	0	0	0	0	0	3	0.0164835	0	0	0	0	0	0	0	0	1	0.00194553	1	0.00268817	0	0	0	0	0	0	5	0.00854701	0	0	1	0.00202429	0	0	2	0.00452489	0	0	1	0.00671141	0	0	0
MYH10	0	0	4	0.00973236	0	0	0	0	0	0	0	0	0	0	0	0	1	0.00191205	0	0	0	0	1	0.00194553	0	0	1	0.00176678	0	0	0	0	0	0	0	0	2	0.00404858	9	0.0352941	1	0.00226244	0	0	0	0	0	0	0
MYH2	0	0	4	0.00973236	1	0.000922509	1	0.003367	0	0	1	0.0016835	2	0.010989	0	0	0	0	1	0.0153846	0	0	1	0.00194553	1	0.00268817	5	0.00883392	1	0.00205339	0	0	6	0.0102564	2	0.0108696	2	0.00404858	2	0.00784314	7	0.0158371	0	0	0	0	0	0	0
MYH9	0	0	1	0.00243309	0	0	0	0	0	0	0	0	1	0.00549451	0	0	0	0	0	0	0	0	2	0.00389105	0	0	1	0.00176678	0	0	0	0	3	0.00512821	0	0	1	0.00202429	5	0.0196078	0	0	1	0.00227273	0	0	0	0	0
MYLK	0	0	5	0.0121655	3	0.00276753	17	0.0572391	0	0	0	0	5	0.0274725	1	0.0017094	12	0.0229446	0	0	1	0.00195312	0	0	0	0	1	0.00176678	26	0.0533881	0	0	11	0.0188034	1	0.00543478	3	0.00607287	5	0.0196078	0	0	1	0.00227273	0	0	0	0	1
MYOF	0	0	1	0.00243309	1	0.000922509	0	0	0	0	1	0.0016835	0	0	1	0.0017094	0	0	0	0	0	0	1	0.00194553	0	0	0	0	2	0.00410678	0	0	4	0.00683761	0	0	3	0.00607287	0	0	0	0	1	0.00227273	0	0	0	0	0
MYOZ1	0	0	6	0.0145985	6	0.00553506	0	0	1	0.0277778	1	0.0016835	1	0.00549451	1	0.0017094	3	0.00573614	0	0	0	0	0	0	4	0.0107527	1	0.00176678	2	0.00410678	0	0	15	0.025641	2	0.0108696	3	0.00607287	1	0.00392157	0	0	11	0.025	0	0	0	0	0
NACA	2	0.0229885	1	0.00243309	0	0	0	0	1	0.0277778	1	0.0016835	1	0.00549451	7	0.0119658	1	0.00191205	0	0	0	0	2	0.00389105	5	0.0134409	11	0.0194346	0	0	0	0	8	0.0136752	3	0.0163043	1	0.00202429	8	0.0313725	6	0.0135747	4	0.00909091	0	0	0	0	0
NBEAL2	0	0	1	0.00243309	0	0	0	0	0	0	0	0	1	0.00549451	0	0	0	0	1	0.0153846	0	0	0	0	1	0.00268817	0	0	0	0	0	0	2	0.0034188	0	0	0	0	0	0	1	0.00226244	0	0	0	0	0	0	0
NDNF	0	0	3	0.00729927	0	0	0	0	0	0	0	0	0	0	1	0.0017094	0	0	0	0	0	0	0	0	1	0.00268817	0	0	0	0	0	0	2	0.0034188	0	0	0	0	3	0.0117647	1	0.00226244	1	0.00227273	0	0	0	0	0
NF1	0	0	15	0.0364964	10	0.00922509	2	0.00673401	1	0.0277778	3	0.00505051	3	0.0164835	1	0.0017094	1	0.00191205	0	0	1	0.00195312	1	0.00194553	4	0.0107527	2	0.00353357	1	0.00205339	0	0	1	0.0017094	3	0.0163043	0	0	1	0.00392157	2	0.00452489	5	0.0113636	0	0	1	0.00200401	1
NFE2L2	0	0	6	0.0145985	1	0.000922509	4	0.013468	0	0	0	0	6	0.032967	0	0	15	0.0286807	0	0	2	0.00390625	0	0	6	0.016129	3	0.00530035	13	0.026694	0	0	15	0.025641	1	0.00543478	1	0.00202429	1	0.00392157	0	0	2	0.00454545	0	0	0	0	0
NLRP6	0	0	0	0	2	0.00184502	0	0	0	0	0	0	0	0	1	0.0017094	2	0.00382409	0	0	1	0.00195312	2	0.00389105	1	0.00268817	0	0	1	0.00205339	0	0	3	0.00512821	1	0.00543478	0	0	1	0.00392157	1	0.00226244	3	0.00681818	0	0	0	0	0
NOG	0	0	10	0.0243309	28	0.0258303	2	0.00673401	0	0	2	0.003367	1	0.00549451	1	0.0017094	0	0	0	0	2	0.00390625	3	0.00583658	6	0.016129	2	0.00353357	2	0.00410678	4	0.045977	3	0.00512821	2	0.0108696	2	0.00404858	2	0.00784314	6	0.0135747	2	0.00454545	0	0	1	0.00200401	1
NOTCH2	1	0.0114943	39	0.0948905	45	0.0415129	6	0.020202	3	0.0833333	6	0.010101	8	0.043956	2	0.0034188	8	0.0152964	0	0	1	0.00195312	0	0	36	0.0967742	39	0.0689046	24	0.0492813	1	0.0114943	32	0.0547009	12	0.0652174	4	0.00809717	10	0.0392157	21	0.0475113	12	0.0272727	1	0.00671141	0	0	1
NR4A3	2	0.0229885	2	0.00486618	0	0	0	0	0	0	0	0	0	0	0	0	0	0	0	0	0	0	1	0.00194553	0	0	0	0	0	0	0	0	5	0.00854701	0	0	0	0	3	0.0117647	4	0.00904977	1	0.00227273	0	0	0	0	0
P2RX1	0	0	9	0.0218978	4	0.00369004	24	0.0808081	0	0	0	0	19	0.104396	2	0.0034188	36	0.0688337	0	0	3	0.00585938	0	0	1	0.00268817	8	0.0141343	75	0.154004	0	0	33	0.0564103	3	0.0163043	6	0.0121457	1	0.00392157	1	0.00226244	7	0.0159091	0	0	0	0	1
P2RY1	1	0.0114943	10	0.0243309	7	0.00645756	24	0.0808081	0	0	0	0	20	0.10989	1	0.0017094	36	0.0688337	0	0	3	0.00585938	1	0.00194553	1	0.00268817	8	0.0141343	73	0.149897	0	0	37	0.0632479	3	0.0163043	6	0.0121457	1	0.00392157	1	0.00226244	7	0.0159091	0	0	0	0	1
P2RY12	1	0.0114943	12	0.0291971	0	0	0	0	1	0.0277778	1	0.0016835	6	0.032967	0	0	0	0	0	0	0	0	0	0	0	0	0	0	0	0	0	0	0	0	0	0	0	0	5	0.0196078	0	0	0	0	0	0	0	0	0
PAK1	0	0	3	0.00729927	2	0.00184502	1	0.003367	1	0.0277778	0	0	1	0.00549451	1	0.0017094	0	0	0	0	0	0	0	0	0	0	0	0	1	0.00205339	0	0	2	0.0034188	1	0.00543478	1	0.00202429	0	0	0	0	0	0	0	0	0	0	0
PAPSS2	1	0.0114943	5	0.0121655	2	0.00184502	0	0	1	0.0277778	0	0	5	0.0274725	2	0.0034188	6	0.0114723	0	0	1	0.00195312	3	0.00583658	8	0.0215054	7	0.0123675	2	0.00410678	2	0.0229885	18	0.0307692	2	0.0108696	2	0.00404858	2	0.00784314	2	0.00452489	6	0.0136364	0	0	0	0	0
PARD3	0	0	13	0.0316302	5	0.00461255	41	0.138047	0	0	0	0	34	0.186813	6	0.0102564	48	0.0917782	0	0	6	0.0117188	2	0.00389105	4	0.0107527	9	0.0159011	136	0.279261	0	0	91	0.155556	4	0.0217391	10	0.0202429	1	0.00392157	1	0.00226244	19	0.0431818	2	0.0134228	0	0	1
PDCD10	1	0.0114943	13	0.0316302	4	0.00369004	1	0.003367	0	0	0	0	10	0.0549451	9	0.0153846	9	0.0172084	0	0	2	0.00390625	1	0.00194553	3	0.00806452	17	0.0300353	9	0.0184805	2	0.0229885	8	0.0136752	4	0.0217391	0	0	6	0.0235294	8	0.0180995	17	0.0386364	1	0.00671141	0	0	0
PDGFA	3	0.0344828	4	0.00973236	1	0.000922509	1	0.003367	0	0	0	0	1	0.00549451	1	0.0017094	0	0	0	0	0	0	2	0.00389105	2	0.00537634	2	0.00353357	1	0.00205339	0	0	6	0.0102564	1	0.00543478	0	0	3	0.0117647	9	0.020362	2	0.00454545	0	0	0	0	0
PDGFB	0	0	7	0.0170316	0	0	0	0	0	0	2	0.003367	4	0.021978	0	0	0	0	0	0	0	0	0	0	0	0	0	0	0	0	0	0	0	0	0	0	0	0	8	0.0313725	0	0	0	0	0	0	0	0	0
PDGFRA	0	0	4	0.00973236	0	0	1	0.003367	0	0	0	0	4	0.021978	8	0.0136752	0	0	0	0	0	0	0	0	2	0.00537634	2	0.00353357	0	0	0	0	10	0.017094	2	0.0108696	1	0.00202429	5	0.0196078	3	0.00678733	4	0.00909091	0	0	0	0	0
PDPN	1	0.0114943	16	0.0389294	38	0.0350554	5	0.016835	4	0.111111	3	0.00505051	5	0.0274725	4	0.00683761	3	0.00573614	0	0	1	0.00195312	5	0.00972763	39	0.104839	28	0.04947	13	0.026694	1	0.0114943	17	0.0290598	7	0.0380435	3	0.00607287	10	0.0392157	7	0.0158371	5	0.0113636	1	0.00671141	0	0	2
PEAR1	3	0.0344828	12	0.0291971	38	0.0350554	4	0.013468	0	0	5	0.00841751	5	0.0274725	1	0.0017094	0	0	0	0	1	0.00195312	8	0.0155642	11	0.0295699	7	0.0123675	4	0.00821355	5	0.0574713	8	0.0136752	3	0.0163043	2	0.00404858	2	0.00784314	8	0.0180995	9	0.0204545	0	0	1	0.00200401	2
PECAM1	1	0.0114943	7	0.0170316	8	0.00738007	2	0.00673401	0	0	2	0.003367	6	0.032967	1	0.0017094	3	0.00573614	0	0	0	0	0	0	0	0	4	0.00706714	11	0.0225873	0	0	12	0.0205128	1	0.00543478	4	0.00809717	3	0.0117647	1	0.00226244	8	0.0181818	0	0	0	0	0
PF4	1	0.0114943	6	0.0145985	2	0.00184502	12	0.040404	0	0	0	0	7	0.0384615	1	0.0017094	14	0.0267686	0	0	1	0.00195312	1	0.00194553	1	0.00268817	0	0	26	0.0533881	0	0	17	0.0290598	1	0.00543478	2	0.00404858	5	0.0196078	0	0	1	0.00227273	0	0	0	0	1
PHLDB2	0	0	4	0.00973236	0	0	0	0	0	0	0	0	11	0.0604396	0	0	0	0	0	0	0	0	0	0	0	0	0	0	0	0	0	0	0	0	0	0	0	0	3	0.0117647	0	0	0	0	0	0	0	0	0
PIK3CB	0	0	2	0.00486618	3	0.00276753	3	0.010101	0	0	0	0	2	0.010989	3	0.00512821	1	0.00191205	0	0	0	0	12	0.0233463	1	0.00268817	0	0	1	0.00205339	1	0.0114943	0	0	1	0.00543478	1	0.00202429	12	0.0470588	0	0	0	0	0	0	0	0	1
PIP5K1C	1	0.0114943	14	0.0340633	24	0.0221402	3	0.010101	3	0.0833333	5	0.00841751	3	0.0164835	1	0.0017094	3	0.00573614	0	0	0	0	0	0	23	0.061828	11	0.0194346	10	0.0205339	1	0.0114943	12	0.0205128	5	0.0271739	1	0.00202429	5	0.0196078	4	0.00904977	7	0.0159091	0	0	1	0.00200401	2
PLA2G4A	0	0	7	0.0170316	7	0.00645756	0	0	1	0.0277778	2	0.003367	1	0.00549451	0	0	3	0.00573614	0	0	0	0	0	0	3	0.00806452	1	0.00176678	2	0.00410678	0	0	16	0.0273504	2	0.0108696	3	0.00607287	1	0.00392157	0	0	13	0.0295455	0	0	0	0	0
PLAU	0	0	12	0.0291971	47	0.0433579	8	0.026936	0	0	12	0.020202	18	0.0989011	8	0.0136752	35	0.0669216	0	0	3	0.00585938	15	0.0291829	35	0.094086	23	0.040636	23	0.0472279	1	0.0114943	121	0.206838	16	0.0869565	31	0.062753	7	0.027451	15	0.0339367	22	0.05	1	0.00671141	0	0	0
PLEC	1	0.0114943	7	0.0170316	1	0.000922509	0	0	0	0	0	0	1	0.00549451	1	0.0017094	2	0.00382409	0	0	0	0	1	0.00194553	0	0	1	0.00176678	7	0.0143737	0	0	7	0.0119658	0	0	0	0	2	0.00784314	1	0.00226244	1	0.00227273	0	0	0	0	0
PLEK	0	0	0	0	1	0.000922509	0	0	0	0	0	0	0	0	2	0.0034188	0	0	1	0.0153846	1	0.00195312	2	0.00389105	0	0	3	0.00530035	1	0.00205339	0	0	7	0.0119658	1	0.00543478	0	0	0	0	0	0	2	0.00454545	0	0	0	0	0
PLET1	0	0	0	0	3	0.00276753	0	0	0	0	2	0.003367	0	0	0	0	0	0	0	0	0	0	0	0	1	0.00268817	1	0.00176678	1	0.00205339	0	0	4	0.00683761	0	0	0	0	6	0.0235294	0	0	3	0.00681818	0	0	0	0	0
PLG	2	0.0229885	7	0.0170316	6	0.00553506	3	0.010101	0	0	0	0	0	0	0	0	2	0.00382409	0	0	0	0	1	0.00194553	5	0.0134409	4	0.00706714	2	0.00410678	0	0	15	0.025641	0	0	0	0	9	0.0352941	1	0.00226244	0	0	0	0	0	0	0
PLPP3	1	0.0114943	0	0	0	0	0	0	0	0	0	0	0	0	3	0.00512821	0	0	1	0.0153846	1	0.00195312	11	0.0214008	0	0	4	0.00706714	0	0	1	0.0114943	2	0.0034188	0	0	2	0.00404858	1	0.00392157	0	0	5	0.0113636	0	0	0	0	1
POU2F3	0	0	0	0	0	0	2	0.00673401	0	0	1	0.0016835	2	0.010989	1	0.0017094	1	0.00191205	0	0	0	0	1	0.00194553	1	0.00268817	1	0.00176678	1	0.00205339	0	0	2	0.0034188	0	0	0	0	1	0.00392157	5	0.0113122	0	0	0	0	0	0	0
PPARA	0	0	2	0.00486618	5	0.00461255	0	0	1	0.0277778	2	0.003367	4	0.021978	2	0.0034188	3	0.00573614	0	0	0	0	3	0.00583658	6	0.016129	4	0.00706714	1	0.00205339	1	0.0114943	18	0.0307692	0	0	0	0	5	0.0196078	11	0.0248869	3	0.00681818	0	0	0	0	0
PPARD	0	0	3	0.00729927	1	0.000922509	2	0.00673401	0	0	1	0.0016835	5	0.0274725	9	0.0153846	5	0.00956023	0	0	0	0	4	0.0077821	3	0.00806452	6	0.0106007	6	0.0123203	0	0	3	0.00512821	1	0.00543478	0	0	2	0.00784314	3	0.00678733	6	0.0136364	1	0.00671141	0	0	0
PPIA	3	0.0344828	0	0	40	0.0369004	1	0.003367	1	0.0277778	0	0	0	0	2	0.0034188	1	0.00191205	0	0	0	0	1	0.00194553	0	0	3	0.00530035	1	0.00205339	0	0	9	0.0153846	0	0	5	0.0101215	3	0.0117647	0	0	2	0.00454545	0	0	0	0	0
PPL	1	0.0114943	9	0.0218978	3	0.00276753	5	0.016835	0	0	0	0	5	0.0274725	4	0.00683761	13	0.0248566	0	0	0	0	2	0.00389105	1	0.00268817	7	0.0123675	2	0.00410678	0	0	28	0.0478632	0	0	2	0.00404858	2	0.00784314	4	0.00904977	5	0.0113636	0	0	0	0	0
PRCP	0	0	2	0.00486618	2	0.00184502	5	0.016835	0	0	0	0	3	0.0164835	4	0.00683761	1	0.00191205	0	0	0	0	9	0.0175097	0	0	0	0	5	0.0102669	2	0.0229885	35	0.0598291	0	0	1	0.00202429	4	0.0156863	0	0	3	0.00681818	0	0	0	0	1
PRDX2	2	0.0229885	9	0.0218978	41	0.0378229	5	0.016835	0	0	9	0.0151515	4	0.021978	2	0.0034188	0	0	0	0	1	0.00195312	8	0.0155642	13	0.0349462	9	0.0159011	5	0.0102669	5	0.0574713	6	0.0102564	2	0.0108696	3	0.00607287	7	0.027451	8	0.0180995	7	0.0159091	0	0	1	0.00200401	2
PRKCA	1	0.0114943	1	0.00243309	1	0.000922509	0	0	0	0	0	0	3	0.0164835	0	0	0	0	0	0	0	0	1	0.00194553	2	0.00537634	0	0	0	0	0	0	8	0.0136752	0	0	0	0	0	0	2	0.00452489	0	0	1	0.00671141	0	0	0
PRKCD	2	0.0229885	9	0.0218978	4	0.00369004	1	0.003367	0	0	1	0.0016835	1	0.00549451	0	0	2	0.00382409	0	0	0	0	1	0.00194553	1	0.00268817	3	0.00530035	9	0.0184805	0	0	13	0.0222222	0	0	0	0	0	0	3	0.00678733	1	0.00227273	1	0.00671141	0	0	0
PRKCE	0	0	29	0.0705596	13	0.0119926	0	0	0	0	0	0	2	0.010989	5	0.00854701	1	0.00191205	0	0	1	0.00195312	3	0.00583658	4	0.0107527	5	0.00883392	2	0.00410678	0	0	22	0.0376068	2	0.0108696	3	0.00607287	4	0.0156863	0	0	3	0.00681818	0	0	0	0	0
PRKCQ	1	0.0114943	9	0.0218978	4	0.00369004	1	0.003367	1	0.0277778	0	0	3	0.0164835	0	0	6	0.0114723	0	0	0	0	4	0.0077821	1	0.00268817	2	0.00353357	3	0.00616016	0	0	3	0.00512821	1	0.00543478	1	0.00202429	2	0.00784314	0	0	2	0.00454545	0	0	0	0	0
PRKG1	0	0	3	0.00729927	0	0	0	0	0	0	0	0	2	0.010989	0	0	3	0.00573614	0	0	0	0	0	0	2	0.00537634	1	0.00176678	1	0.00205339	0	0	3	0.00512821	0	0	0	0	4	0.0156863	1	0.00226244	1	0.00227273	1	0.00671141	0	0	0
PROC	1	0.0114943	8	0.0194647	5	0.00461255	7	0.023569	0	0	23	0.0387205	6	0.032967	0	0	10	0.0191205	0	0	0	0	1	0.00194553	2	0.00537634	5	0.00883392	7	0.0143737	0	0	16	0.0273504	0	0	3	0.00607287	3	0.0117647	3	0.00678733	9	0.0204545	0	0	0	0	0
PROCR	2	0.0229885	12	0.0291971	5	0.00461255	15	0.0505051	1	0.0277778	0	0	7	0.0384615	0	0	18	0.0344168	0	0	1	0.00195312	0	0	2	0.00537634	3	0.00530035	38	0.0780287	0	0	8	0.0136752	0	0	1	0.00202429	11	0.0431373	2	0.00452489	3	0.00681818	0	0	0	0	1
PROS1	0	0	11	0.026764	4	0.00369004	2	0.00673401	0	0	11	0.0185185	4	0.021978	1	0.0017094	8	0.0152964	0	0	1	0.00195312	5	0.00972763	10	0.0268817	4	0.00706714	10	0.0205339	1	0.0114943	11	0.0188034	0	0	1	0.00202429	10	0.0392157	3	0.00678733	10	0.0227273	0	0	0	0	0
PROZ	1	0.0114943	0	0	0	0	0	0	0	0	0	0	0	0	0	0	0	0	0	0	1	0.00195312	0	0	1	0.00268817	3	0.00530035	0	0	0	0	4	0.00683761	2	0.0108696	1	0.00202429	0	0	0	0	1	0.00227273	0	0	0	0	0
PRSS56	0	0	2	0.00486618	3	0.00276753	1	0.003367	1	0.0277778	0	0	0	0	1	0.0017094	0	0	0	0	0	0	0	0	0	0	0	0	0	0	0	0	3	0.00512821	1	0.00543478	1	0.00202429	0	0	0	0	0	0	0	0	0	0	0
PTEN	0	0	3	0.00729927	3	0.00276753	1	0.003367	0	0	0	0	0	0	0	0	1	0.00191205	0	0	0	0	0	0	1	0.00268817	2	0.00353357	1	0.00205339	0	0	8	0.0136752	0	0	2	0.00404858	7	0.027451	2	0.00452489	0	0	0	0	0	0	0
PTGER3	1	0.0114943	23	0.0559611	1	0.000922509	14	0.047138	0	0	3	0.00505051	15	0.0824176	0	0	17	0.0325048	0	0	2	0.00390625	1	0.00194553	3	0.00806452	29	0.0512367	37	0.0759754	0	0	22	0.0376068	2	0.0108696	1	0.00202429	9	0.0352941	6	0.0135747	27	0.0613636	0	0	0	0	0
PTGER4	5	0.0574713	11	0.026764	48	0.0442804	8	0.026936	0	0	12	0.020202	20	0.10989	7	0.0119658	34	0.0650096	0	0	3	0.00585938	16	0.0311284	36	0.0967742	29	0.0512367	21	0.0431211	1	0.0114943	121	0.206838	16	0.0869565	31	0.062753	8	0.0313725	15	0.0339367	25	0.0568182	1	0.00671141	0	0	0
PTK2	2	0.0229885	6	0.0145985	5	0.00461255	2	0.00673401	1	0.0277778	4	0.00673401	15	0.0824176	3	0.00512821	4	0.00764818	0	0	2	0.00390625	2	0.00389105	11	0.0295699	9	0.0159011	7	0.0143737	1	0.0114943	26	0.0444444	3	0.0163043	1	0.00202429	7	0.027451	13	0.0294118	27	0.0613636	0	0	0	0	0
PTK7	2	0.0229885	7	0.0170316	5	0.00461255	1	0.003367	0	0	3	0.00505051	3	0.0164835	8	0.0136752	6	0.0114723	0	0	0	0	21	0.040856	1	0.00268817	6	0.0106007	11	0.0225873	1	0.0114943	32	0.0547009	5	0.0271739	0	0	3	0.0117647	4	0.00904977	3	0.00681818	9	0.0604027	0	0	1
PTPN6	0	0	3	0.00729927	4	0.00369004	1	0.003367	0	0	0	0	0	0	0	0	3	0.00573614	0	0	0	0	0	0	0	0	3	0.00530035	0	0	0	0	4	0.00683761	1	0.00543478	0	0	1	0.00392157	0	0	2	0.00454545	0	0	0	0	0
PTPRJ	0	0	0	0	3	0.00276753	1	0.003367	1	0.0277778	1	0.0016835	2	0.010989	1	0.0017094	1	0.00191205	0	0	0	0	3	0.00583658	6	0.016129	1	0.00176678	1	0.00205339	2	0.0229885	26	0.0444444	0	0	2	0.00404858	2	0.00784314	3	0.00678733	2	0.00454545	0	0	0	0	0
RAB27A	0	0	1	0.00243309	1	0.000922509	0	0	0	0	0	0	0	0	0	0	1	0.00191205	1	0.0153846	0	0	0	0	2	0.00537634	1	0.00176678	0	0	2	0.0229885	1	0.0017094	0	0	0	0	2	0.00784314	1	0.00226244	1	0.00227273	0	0	0	0	0
RAB3A	2	0.0229885	9	0.0218978	4	0.00369004	24	0.0808081	1	0.0277778	0	0	21	0.115385	2	0.0034188	35	0.0669216	0	0	3	0.00585938	0	0	1	0.00268817	8	0.0141343	74	0.151951	0	0	34	0.0581197	3	0.0163043	6	0.0121457	1	0.00392157	0	0	7	0.0159091	0	0	0	0	1
RAP2B	1	0.0114943	5	0.0121655	0	0	0	0	0	0	0	0	1	0.00549451	0	0	2	0.00382409	0	0	0	0	0	0	0	0	0	0	3	0.00616016	0	0	5	0.00854701	0	0	1	0.00202429	3	0.0117647	2	0.00452489	1	0.00227273	0	0	0	0	0
REG3A	1	0.0114943	5	0.0121655	0	0	0	0	0	0	0	0	1	0.00549451	0	0	2	0.00382409	0	0	0	0	0	0	0	0	0	0	3	0.00616016	0	0	5	0.00854701	0	0	1	0.00202429	3	0.0117647	2	0.00452489	1	0.00227273	0	0	0	0	0
REG3G	1	0.0114943	12	0.0291971	4	0.00369004	3	0.010101	1	0.0277778	1	0.0016835	1	0.00549451	1	0.0017094	2	0.00382409	0	0	0	0	2	0.00389105	11	0.0295699	6	0.0106007	3	0.00616016	2	0.0229885	41	0.0700855	0	0	1	0.00202429	1	0.00392157	16	0.0361991	2	0.00454545	0	0	0	0	0
RREB1	0	0	26	0.0632603	45	0.0415129	7	0.023569	4	0.111111	4	0.00673401	8	0.043956	2	0.0034188	4	0.00764818	0	0	1	0.00195312	2	0.00389105	38	0.102151	37	0.065371	15	0.0308008	1	0.0114943	25	0.042735	7	0.0380435	8	0.0161943	12	0.0470588	10	0.0226244	8	0.0181818	0	0	0	0	1
S100A9	3	0.0344828	10	0.0243309	35	0.0322878	0	0	0	0	2	0.003367	0	0	0	0	0	0	0	0	0	0	1	0.00194553	0	0	1	0.00176678	0	0	0	0	2	0.0034188	0	0	5	0.0101215	0	0	0	0	0	0	0	0	0	0	0
SCNN1B	0	0	9	0.0218978	35	0.0322878	0	0	0	0	2	0.003367	0	0	0	0	0	0	0	0	0	0	1	0.00194553	0	0	1	0.00176678	0	0	0	0	1	0.0017094	0	0	5	0.0101215	1	0.00392157	0	0	0	0	0	0	0	0	0
SCNN1G	0	0	12	0.0291971	45	0.0415129	8	0.026936	0	0	11	0.0185185	19	0.104396	7	0.0119658	35	0.0669216	0	0	3	0.00585938	15	0.0291829	35	0.094086	23	0.040636	22	0.0451745	1	0.0114943	120	0.205128	16	0.0869565	30	0.0607287	6	0.0235294	15	0.0339367	20	0.0454545	1	0.00671141	0	0	0
SCRIB	1	0.0114943	10	0.0243309	1	0.000922509	5	0.016835	0	0	0	0	1	0.00549451	4	0.00683761	1	0.00191205	0	0	0	0	1	0.00194553	11	0.0295699	2	0.00353357	4	0.00821355	0	0	9	0.0153846	0	0	0	0	0	0	1	0.00226244	9	0.0204545	0	0	1	0.00200401	0
SDC1	0	0	12	0.0291971	6	0.00553506	3	0.010101	0	0	27	0.0454545	6	0.032967	1	0.0017094	2	0.00382409	0	0	0	0	0	0	1	0.00268817	3	0.00530035	5	0.0102669	0	0	19	0.0324786	0	0	3	0.00607287	1	0.00392157	4	0.00904977	17	0.0386364	0	0	0	0	0
SDC4	2	0.0229885	32	0.0778589	30	0.0276753	3	0.010101	4	0.111111	4	0.00673401	6	0.032967	0	0	2	0.00382409	0	0	1	0.00195312	0	0	32	0.0860215	17	0.0300353	16	0.0328542	1	0.0114943	7	0.0119658	6	0.0326087	1	0.00202429	15	0.0588235	7	0.0158371	8	0.0181818	0	0	0	0	2
SELP	0	0	1	0.00243309	2	0.00184502	4	0.013468	0	0	0	0	0	0	0	0	4	0.00764818	0	0	0	0	1	0.00194553	1	0.00268817	2	0.00353357	7	0.0143737	0	0	7	0.0119658	0	0	3	0.00607287	1	0.00392157	0	0	0	0	0	0	0	0	0
SERPINA10	1	0.0114943	0	0	4	0.00369004	0	0	0	0	0	0	2	0.010989	0	0	0	0	0	0	1	0.00195312	2	0.00389105	1	0.00268817	2	0.00353357	1	0.00205339	0	0	2	0.0034188	1	0.00543478	0	0	3	0.0117647	1	0.00226244	1	0.00227273	0	0	0	0	0
SERPINB2	0	0	22	0.053528	28	0.0258303	4	0.013468	3	0.0833333	5	0.00841751	5	0.0274725	1	0.0017094	2	0.00382409	0	0	1	0.00195312	0	0	31	0.0833333	15	0.0265018	16	0.0328542	1	0.0114943	13	0.0222222	5	0.0271739	1	0.00202429	10	0.0392157	7	0.0158371	6	0.0136364	0	0	0	0	2
SERPINC1	0	0	12	0.0291971	2	0.00184502	3	0.010101	0	0	0	0	2	0.010989	2	0.0034188	9	0.0172084	0	0	0	0	1	0.00194553	2	0.00537634	7	0.0123675	15	0.0308008	1	0.0114943	14	0.0239316	0	0	1	0.00202429	10	0.0392157	11	0.0248869	4	0.00909091	2	0.0134228	2	0.00400802	2
SERPIND1	2	0.0229885	7	0.0170316	2	0.00184502	2	0.00673401	1	0.0277778	3	0.00505051	15	0.0824176	5	0.00854701	16	0.0305927	0	0	3	0.00585938	0	0	2	0.00537634	9	0.0159011	16	0.0328542	0	0	11	0.0188034	5	0.0271739	5	0.0101215	3	0.0117647	2	0.00452489	15	0.0340909	1	0.00671141	0	0	0
SERPINE1	1	0.0114943	0	0	0	0	0	0	0	0	0	0	0	0	1	0.0017094	0	0	0	0	1	0.00195312	0	0	1	0.00268817	2	0.00353357	0	0	0	0	3	0.00512821	3	0.0163043	0	0	2	0.00784314	1	0.00226244	2	0.00454545	0	0	0	0	0
SERPINE2	0	0	2	0.00486618	1	0.000922509	0	0	0	0	1	0.0016835	1	0.00549451	0	0	0	0	0	0	1	0.00195312	2	0.00389105	2	0.00537634	0	0	0	0	0	0	8	0.0136752	0	0	1	0.00202429	4	0.0156863	2	0.00452489	1	0.00227273	0	0	0	0	0
SERPINF2	1	0.0114943	5	0.0121655	6	0.00553506	0	0	0	0	0	0	3	0.0164835	0	0	3	0.00573614	0	0	0	0	0	0	1	0.00268817	1	0.00176678	0	0	2	0.0229885	3	0.00512821	0	0	1	0.00202429	1	0.00392157	1	0.00226244	1	0.00227273	0	0	0	0	0
SERPING1	0	0	11	0.026764	0	0	0	0	0	0	0	0	1	0.00549451	0	0	1	0.00191205	0	0	0	0	1	0.00194553	1	0.00268817	1	0.00176678	0	0	0	0	4	0.00683761	0	0	3	0.00607287	5	0.0196078	0	0	2	0.00454545	0	0	0	0	0
SH2B3	1	0.0114943	2	0.00486618	5	0.00461255	1	0.003367	0	0	0	0	2	0.010989	4	0.00683761	1	0.00191205	0	0	4	0.0078125	6	0.0116732	3	0.00806452	11	0.0194346	3	0.00616016	0	0	31	0.0529915	2	0.0108696	2	0.00404858	1	0.00392157	6	0.0135747	4	0.00909091	0	0	0	0	0
SHH	1	0.0114943	1	0.00243309	4	0.00369004	0	0	0	0	2	0.003367	3	0.0164835	0	0	1	0.00191205	0	0	1	0.00195312	0	0	5	0.0134409	3	0.00530035	2	0.00410678	1	0.0114943	1	0.0017094	4	0.0217391	0	0	1	0.00392157	1	0.00226244	6	0.0136364	0	0	1	0.00200401	1
SLC11A1	0	0	3	0.00729927	0	0	0	0	1	0.0277778	0	0	3	0.0164835	0	0	0	0	0	0	0	0	0	0	1	0.00268817	1	0.00176678	3	0.00616016	0	0	5	0.00854701	0	0	1	0.00202429	6	0.0235294	3	0.00678733	3	0.00681818	0	0	0	0	0
SLC12A2	1	0.0114943	0	0	0	0	1	0.003367	0	0	0	0	0	0	0	0	0	0	0	0	0	0	1	0.00194553	2	0.00537634	2	0.00353357	1	0.00205339	0	0	5	0.00854701	2	0.0108696	3	0.00607287	4	0.0156863	1	0.00226244	3	0.00681818	0	0	0	0	0
SLC4A1	1	0.0114943	0	0	2	0.00184502	0	0	0	0	0	0	2	0.010989	0	0	0	0	0	0	23	0.0449219	0	0	1	0.00268817	1	0.00176678	0	0	0	0	3	0.00512821	1	0.00543478	0	0	1	0.00392157	1	0.00226244	2	0.00454545	0	0	1	0.00200401	0
SLC7A11	0	0	0	0	1	0.000922509	0	0	0	0	0	0	0	0	0	0	0	0	1	0.0153846	0	0	0	0	1	0.00268817	1	0.00176678	2	0.00410678	3	0.0344828	3	0.00512821	0	0	0	0	3	0.0117647	3	0.00678733	4	0.00909091	0	0	0	0	0
SMAD3	0	0	0	0	0	0	0	0	0	0	0	0	0	0	0	0	0	0	0	0	1	0.00195312	1	0.00194553	0	0	0	0	1	0.00205339	0	0	3	0.00512821	0	0	0	0	1	0.00392157	0	0	2	0.00454545	0	0	0	0	0
SMAD4	0	0	1	0.00243309	1	0.000922509	1	0.003367	0	0	1	0.0016835	1	0.00549451	1	0.0017094	2	0.00382409	0	0	0	0	0	0	2	0.00537634	0	0	0	0	1	0.0114943	2	0.0034188	0	0	0	0	6	0.0235294	0	0	10	0.0227273	0	0	1	0.00200401	0
SMOC2	2	0.0229885	14	0.0340633	28	0.0258303	1	0.003367	0	0	6	0.010101	2	0.010989	0	0	22	0.042065	0	0	2	0.00390625	1	0.00194553	20	0.0537634	11	0.0194346	9	0.0184805	0	0	11	0.0188034	6	0.0326087	21	0.0425101	4	0.0156863	7	0.0158371	8	0.0181818	1	0.00671141	0	0	0
SNAI2	0	0	6	0.0145985	5	0.00461255	2	0.00673401	1	0.0277778	4	0.00673401	15	0.0824176	3	0.00512821	4	0.00764818	0	0	1	0.00195312	2	0.00389105	11	0.0295699	9	0.0159011	7	0.0143737	1	0.0114943	25	0.042735	3	0.0163043	0	0	7	0.027451	13	0.0294118	27	0.0613636	0	0	0	0	0
SRF	1	0.0114943	13	0.0316302	7	0.00645756	3	0.010101	0	0	21	0.0353535	5	0.0274725	0	0	2	0.00382409	0	0	0	0	0	0	1	0.00268817	6	0.0106007	4	0.00821355	0	0	7	0.0119658	0	0	4	0.00809717	5	0.0196078	4	0.00904977	16	0.0363636	0	0	0	0	0
SRSF6	3	0.0344828	0	0	2	0.00184502	0	0	0	0	0	0	3	0.0164835	3	0.00512821	2	0.00382409	1	0.0153846	1	0.00195312	10	0.0194553	2	0.00537634	5	0.00883392	0	0	1	0.0114943	4	0.00683761	0	0	1	0.00202429	0	0	0	0	5	0.0113636	0	0	0	0	1
ST3GAL4	0	0	8	0.0194647	2	0.00184502	0	0	0	0	13	0.0218855	8	0.043956	2	0.0034188	1	0.00191205	0	0	0	0	1	0.00194553	1	0.00268817	2	0.00353357	1	0.00205339	0	0	2	0.0034188	2	0.0108696	0	0	2	0.00784314	2	0.00452489	11	0.025	0	0	0	0	0
STARD13	0	0	0	0	4	0.00369004	0	0	0	0	0	0	3	0.0164835	4	0.00683761	3	0.00573614	1	0.0153846	0	0	6	0.0116732	2	0.00537634	0	0	1	0.00205339	0	0	5	0.00854701	0	0	8	0.0161943	1	0.00392157	2	0.00452489	3	0.00681818	0	0	0	0	0
STXBP1	1	0.0114943	3	0.00729927	1	0.000922509	2	0.00673401	0	0	0	0	0	0	0	0	0	0	0	0	0	0	1	0.00194553	2	0.00537634	0	0	1	0.00205339	0	0	6	0.0102564	0	0	1	0.00202429	1	0.00392157	6	0.0135747	1	0.00227273	0	0	0	0	0
STXBP3	1	0.0114943	2	0.00486618	1	0.000922509	1	0.003367	0	0	2	0.003367	1	0.00549451	2	0.0034188	3	0.00573614	0	0	0	0	2	0.00389105	0	0	2	0.00353357	1	0.00205339	0	0	0	0	0	0	1	0.00202429	5	0.0196078	0	0	4	0.00909091	0	0	0	0	0
SYK	2	0.0229885	3	0.00729927	8	0.00738007	1	0.003367	2	0.0555556	1	0.0016835	4	0.021978	0	0	2	0.00382409	0	0	0	0	0	0	4	0.0107527	2	0.00353357	0	0	2	0.0229885	2	0.0034188	1	0.00543478	1	0.00202429	1	0.00392157	2	0.00452489	4	0.00909091	0	0	0	0	0
SYT11	2	0.0229885	18	0.0437956	41	0.0378229	7	0.023569	4	0.111111	3	0.00505051	3	0.0164835	2	0.0034188	3	0.00573614	0	0	1	0.00195312	4	0.0077821	41	0.110215	31	0.0547703	13	0.026694	1	0.0114943	28	0.0478632	7	0.0380435	4	0.00809717	9	0.0352941	8	0.0180995	8	0.0181818	0	0	0	0	2
SYT7	1	0.0114943	6	0.0145985	2	0.00184502	0	0	0	0	0	0	4	0.021978	0	0	3	0.00573614	0	0	6	0.0117188	5	0.00972763	0	0	0	0	4	0.00821355	0	0	1	0.0017094	1	0.00543478	1	0.00202429	2	0.00784314	2	0.00452489	2	0.00454545	0	0	1	0.00200401	0
SYTL4	0	0	2	0.00486618	2	0.00184502	3	0.010101	0	0	0	0	1	0.00549451	3	0.00512821	1	0.00191205	0	0	0	0	12	0.0233463	1	0.00268817	0	0	0	0	1	0.0114943	0	0	1	0.00543478	1	0.00202429	13	0.0509804	0	0	0	0	0	0	0	0	1
TBXA2R	1	0.0114943	2	0.00486618	0	0	0	0	0	0	1	0.0016835	1	0.00549451	2	0.0034188	2	0.00382409	0	0	0	0	2	0.00389105	0	0	1	0.00176678	1	0.00205339	0	0	2	0.0034188	0	0	5	0.0101215	6	0.0235294	0	0	0	0	0	0	0	0	0
TFPI	0	0	3	0.00729927	1	0.000922509	2	0.00673401	0	0	0	0	3	0.0164835	0	0	7	0.0133843	0	0	3	0.00585938	1	0.00194553	3	0.00806452	3	0.00530035	5	0.0102669	0	0	13	0.0222222	0	0	0	0	1	0.00392157	1	0.00226244	2	0.00454545	0	0	0	0	0
TFPI2	2	0.0229885	5	0.0121655	0	0	2	0.00673401	1	0.0277778	1	0.0016835	22	0.120879	9	0.0153846	19	0.0363289	0	0	3	0.00585938	1	0.00194553	6	0.016129	7	0.0123675	17	0.0349076	0	0	9	0.0153846	6	0.0326087	7	0.01417	4	0.0156863	2	0.00452489	23	0.0522727	3	0.0201342	0	0	0
TGFB1	0	0	3	0.00729927	4	0.00369004	5	0.016835	0	0	1	0.0016835	1	0.00549451	0	0	2	0.00382409	0	0	0	0	5	0.00972763	1	0.00268817	2	0.00353357	7	0.0143737	1	0.0114943	9	0.0153846	2	0.0108696	0	0	10	0.0392157	0	0	4	0.00909091	0	0	0	0	0
TGFB2	0	0	3	0.00729927	32	0.0295203	2	0.00673401	2	0.0555556	3	0.00505051	3	0.0164835	2	0.0034188	1	0.00191205	0	0	1	0.00195312	1	0.00194553	20	0.0537634	10	0.0176678	8	0.0164271	0	0	8	0.0136752	3	0.0163043	0	0	3	0.0117647	6	0.0135747	4	0.00909091	0	0	1	0.00200401	3
THBD	0	0	1	0.00243309	2	0.00184502	1	0.003367	0	0	7	0.0117845	4	0.021978	1	0.0017094	2	0.00382409	0	0	0	0	0	0	1	0.00268817	6	0.0106007	1	0.00205339	0	0	5	0.00854701	3	0.0163043	1	0.00202429	2	0.00784314	1	0.00226244	8	0.0181818	1	0.00671141	0	0	0
THBS1	0	0	1	0.00243309	0	0	0	0	0	0	0	0	1	0.00549451	1	0.0017094	0	0	0	0	0	0	0	0	0	0	0	0	0	0	0	0	1	0.0017094	0	0	2	0.00404858	1	0.00392157	0	0	1	0.00227273	0	0	0	0	0
TIMP1	2	0.0229885	2	0.00486618	2	0.00184502	3	0.010101	0	0	1	0.0016835	2	0.010989	0	0	2	0.00382409	0	0	2	0.00390625	2	0.00389105	2	0.00537634	6	0.0106007	3	0.00616016	0	0	20	0.034188	1	0.00543478	2	0.00404858	3	0.0117647	0	0	1	0.00227273	0	0	1	0.00200401	0
TLR4	2	0.0229885	0	0	3	0.00276753	1	0.003367	0	0	0	0	1	0.00549451	4	0.00683761	4	0.00764818	1	0.0153846	0	0	3	0.00583658	1	0.00268817	0	0	1	0.00205339	0	0	3	0.00512821	0	0	8	0.0161943	2	0.00784314	1	0.00226244	1	0.00227273	0	0	0	0	0
TMEFF2	0	0	4	0.00973236	1	0.000922509	2	0.00673401	0	0	0	0	2	0.010989	0	0	6	0.0114723	0	0	3	0.00585938	0	0	2	0.00537634	3	0.00530035	5	0.0102669	0	0	13	0.0222222	1	0.00543478	0	0	3	0.0117647	0	0	4	0.00909091	0	0	0	0	0
TNF	0	0	5	0.0121655	5	0.00461255	4	0.013468	1	0.0277778	3	0.00505051	5	0.0274725	0	0	4	0.00764818	0	0	0	0	2	0.00389105	8	0.0215054	6	0.0106007	2	0.00410678	0	0	19	0.0324786	4	0.0217391	1	0.00202429	1	0.00392157	11	0.0248869	8	0.0181818	0	0	0	0	0
TNFRSF12A	1	0.0114943	0	0	38	0.0350554	1	0.003367	1	0.0277778	0	0	1	0.00549451	2	0.0034188	1	0.00191205	0	0	0	0	1	0.00194553	0	0	2	0.00353357	0	0	0	0	6	0.0102564	0	0	6	0.0121457	2	0.00784314	0	0	1	0.00227273	0	0	1	0.00200401	0
TOR1A	1	0.0114943	0	0	3	0.00276753	0	0	0	0	0	0	2	0.010989	4	0.00683761	5	0.00956023	1	0.0153846	0	0	6	0.0116732	3	0.00806452	0	0	1	0.00205339	0	0	4	0.00683761	0	0	4	0.00809717	2	0.00784314	0	0	4	0.00909091	0	0	1	0.00200401	0
TPM1	0	0	1	0.00243309	1	0.000922509	0	0	0	0	0	0	0	0	0	0	0	0	1	0.0153846	0	0	0	0	2	0.00537634	2	0.00353357	0	0	2	0.0229885	6	0.0102564	0	0	1	0.00202429	3	0.0117647	0	0	2	0.00454545	0	0	0	0	0
TPSAB1	2	0.0229885	1	0.00243309	40	0.0369004	1	0.003367	0	0	1	0.0016835	1	0.00549451	2	0.0034188	1	0.00191205	1	0.0153846	0	0	1	0.00194553	0	0	3	0.00530035	0	0	0	0	7	0.0119658	0	0	5	0.0101215	2	0.00784314	0	0	1	0.00227273	0	0	1	0.00200401	0
TREML1	1	0.0114943	7	0.0170316	6	0.00553506	0	0	1	0.0277778	4	0.00673401	10	0.0549451	1	0.0017094	5	0.00956023	0	0	0	0	3	0.00583658	6	0.016129	9	0.0159011	4	0.00821355	1	0.0114943	23	0.0393162	3	0.0163043	2	0.00404858	6	0.0235294	10	0.0226244	21	0.0477273	0	0	0	0	1
TRIM72	0	0	5	0.0121655	37	0.0341328	0	0	0	0	3	0.00505051	2	0.010989	0	0	0	0	0	0	0	0	3	0.00583658	0	0	4	0.00706714	3	0.00616016	1	0.0114943	2	0.0034188	0	0	4	0.00809717	1	0.00392157	1	0.00226244	2	0.00454545	0	0	0	0	0
TSPAN32	0	0	15	0.0364964	8	0.00738007	1	0.003367	0	0	1	0.0016835	8	0.043956	6	0.0102564	10	0.0191205	0	0	1	0.00195312	0	0	1	0.00268817	11	0.0194346	12	0.0246407	1	0.0114943	16	0.0273504	6	0.0326087	4	0.00809717	26	0.101961	7	0.0158371	9	0.0204545	3	0.0201342	0	0	0
TSPAN8	5	0.0574713	0	0	2	0.00184502	0	0	0	0	0	0	0	0	0	0	1	0.00191205	0	0	0	0	2	0.00389105	1	0.00268817	1	0.00176678	0	0	0	0	0	0	0	0	0	0	2	0.00784314	0	0	2	0.00454545	0	0	0	0	0
TXK	1	0.0114943	3	0.00729927	1	0.000922509	1	0.003367	0	0	2	0.003367	6	0.032967	12	0.0205128	4	0.00764818	0	0	2	0.00390625	8	0.0155642	1	0.00268817	3	0.00530035	15	0.0308008	0	0	6	0.0102564	1	0.00543478	3	0.00607287	8	0.0313725	3	0.00678733	2	0.00454545	1	0.00671141	0	0	0
TYRO3	0	0	0	0	0	0	0	0	0	0	0	0	0	0	1	0.0017094	0	0	0	0	0	0	0	0	0	0	0	0	0	0	0	0	0	0	0	0	1	0.00202429	2	0.00784314	0	0	0	0	0	0	0	0	0
UBASH3A	0	0	2	0.00486618	3	0.00276753	2	0.00673401	0	0	0	0	1	0.00549451	0	0	1	0.00191205	0	0	0	0	0	0	0	0	2	0.00353357	1	0.00205339	0	0	5	0.00854701	0	0	2	0.00404858	1	0.00392157	1	0.00226244	1	0.00227273	0	0	0	0	0
UBASH3B	0	0	0	0	0	0	0	0	0	0	0	0	1	0.00549451	4	0.00683761	1	0.00191205	1	0.0153846	1	0.00195312	12	0.0233463	0	0	4	0.00706714	1	0.00205339	1	0.0114943	4	0.00683761	0	0	3	0.00607287	1	0.00392157	0	0	4	0.00909091	0	0	0	0	1
VANGL2	2	0.0229885	47	0.114355	38	0.0350554	6	0.020202	5	0.138889	3	0.00505051	7	0.0384615	2	0.0034188	5	0.00956023	0	0	1	0.00195312	2	0.00389105	37	0.0994624	26	0.0459364	20	0.0410678	1	0.0114943	9	0.0153846	6	0.0326087	2	0.00404858	15	0.0588235	8	0.0180995	7	0.0159091	0	0	0	0	2
VEGFA	0	0	11	0.026764	0	0	0	0	1	0.0277778	4	0.00673401	22	0.120879	0	0	0	0	0	0	0	0	0	0	0	0	0	0	0	0	0	0	0	0	0	0	0	0	7	0.027451	0	0	0	0	0	0	0	0	0
VEGFB	0	0	6	0.0145985	1	0.000922509	1	0.003367	1	0.0277778	0	0	0	0	1	0.0017094	8	0.0152964	0	0	0	0	0	0	0	0	1	0.00176678	1	0.00205339	0	0	3	0.00512821	0	0	0	0	0	0	2	0.00452489	0	0	0	0	0	0	0
VIL1	0	0	0	0	0	0	1	0.003367	0	0	0	0	0	0	0	0	0	0	0	0	0	0	1	0.00194553	2	0.00537634	2	0.00353357	1	0.00205339	0	0	5	0.00854701	2	0.0108696	3	0.00607287	4	0.0156863	1	0.00226244	3	0.00681818	0	0	0	0	0
VKORC1	0	0	5	0.0121655	37	0.0341328	0	0	0	0	3	0.00505051	2	0.010989	0	0	1	0.00191205	0	0	1	0.00195312	1	0.00194553	0	0	4	0.00706714	3	0.00616016	1	0.0114943	2	0.0034188	0	0	4	0.00809717	1	0.00392157	1	0.00226244	2	0.00454545	0	0	0	0	0
VPS33B	0	0	2	0.00486618	12	0.0110701	6	0.020202	0	0	1	0.0016835	4	0.021978	1	0.0017094	1	0.00191205	0	0	0	0	1	0.00194553	0	0	3	0.00530035	9	0.0184805	2	0.0229885	15	0.025641	4	0.0217391	1	0.00202429	9	0.0352941	6	0.0135747	14	0.0318182	0	0	0	0	0
VWF	0	0	7	0.0170316	4	0.00369004	1	0.003367	0	0	6	0.010101	3	0.0164835	8	0.0136752	9	0.0172084	0	0	0	0	21	0.040856	2	0.00537634	5	0.00883392	11	0.0225873	1	0.0114943	32	0.0547009	5	0.0271739	0	0	6	0.0235294	4	0.00904977	4	0.00909091	10	0.0671141	0	0	1
WFDC1	0	0	6	0.0145985	2	0.00184502	0	0	0	0	0	0	1	0.00549451	1	0.0017094	0	0	1	0.0153846	2	0.00390625	0	0	0	0	1	0.00176678	0	0	0	0	4	0.00683761	2	0.0108696	0	0	1	0.00392157	0	0	4	0.00909091	0	0	0	0	0
WNT3A	0	0	1	0.00243309	39	0.0359779	2	0.00673401	2	0.0555556	3	0.00505051	4	0.021978	1	0.0017094	3	0.00573614	0	0	1	0.00195312	0	0	21	0.0564516	11	0.0194346	9	0.0184805	0	0	21	0.0358974	3	0.0163043	0	0	1	0.00392157	6	0.0135747	8	0.0181818	0	0	1	0.00200401	4
WNT4	0	0	4	0.00973236	1	0.000922509	0	0	0	0	0	0	0	0	2	0.0034188	0	0	0	0	0	0	0	0	1	0.00268817	2	0.00353357	1	0.00205339	0	0	5	0.00854701	1	0.00543478	1	0.00202429	4	0.0156863	3	0.00678733	4	0.00909091	0	0	0	0	0
WNT5A	0	0	0	0	0	0	0	0	0	0	0	0	0	0	1	0.0017094	0	0	0	0	0	0	1	0.00194553	0	0	1	0.00176678	1	0.00205339	0	0	6	0.0102564	0	0	0	0	0	0	3	0.00678733	3	0.00681818	1	0.00671141	0	0	1
WNT7A	0	0	27	0.0656934	2	0.00184502	0	0	0	0	0	0	1	0.00549451	1	0.0017094	1	0.00191205	0	0	0	0	3	0.00583658	1	0.00268817	1	0.00176678	0	0	0	0	5	0.00854701	0	0	1	0.00202429	6	0.0235294	2	0.00452489	3	0.00681818	0	0	0	0	0
XBP1	0	0	8	0.0194647	1	0.000922509	0	0	0	0	1	0.0016835	1	0.00549451	0	0	5	0.00956023	0	0	0	0	1	0.00194553	1	0.00268817	1	0.00176678	6	0.0123203	0	0	6	0.0102564	0	0	0	0	0	0	2	0.00452489	1	0.00227273	0	0	0	0	0
YAP1	0	0	14	0.0340633	0	0	0	0	0	0	1	0.0016835	5	0.0274725	0	0	0	0	0	0	0	0	0	0	0	0	0	0	0	0	0	0	0	0	0	0	0	0	8	0.0313725	0	0	0	0	0	0	0	0	0
[truncated: 8 more columns]

## Sheet: ST4
Supplementary Table 4. Mean frequency of CNV deep deletions per TCGA Pan-Cancer type
Genes	ACC		BLCA		BRCA		CESC		CHOL		COAD		ESCA		GBM		HNSC		KICH		KIRC		LGG		LIHC		LUAD		LUSC		MESO		OV		PAAD		PRAD		SARC		SKCM		STAD		TGCT		THCA		THYM
	N = 87	f	N = 411	f	N = 1084	f	N = 297	f	N = 36	f	N = 594	f	N = 182	f	N = 585	f	N = 523	f	N = 65	f	N = 512	f	N = 514	f	N = 372	f	N = 566	f	N = 487	f	N = 87	f	N = 585	f	N = 184	f	N = 494	f	N = 255	f	N = 442	f	N = 440	f	N = 149	f	N = 499	f	N = 123
ABAT	0	0	2	0.00486618	0	0	1	0.003367	0	0	2	0.003367	0	0	0	0	0	0	0	0	0	0	0	0	1	0.00268817	1	0.00176678	1	0.00205339	0	0	3	0.00512821	0	0	0	0	0	0	0	0	1	0.00227273	0	0	0	0	0
ABCC8	0	0	0	0	0	0	2	0.00673401	0	0	0	0	0	0	0	0	0	0	0	0	0	0	2	0.00389105	0	0	1	0.00176678	0	0	0	0	2	0.0034188	0	0	0	0	0	0	0	0	0	0	0	0	1	0.00200401	0
ACTA2	0	0	7	0.0170316	12	0.0110701	7	0.023569	0	0	4	0.00673401	2	0.010989	14	0.0239316	6	0.0114723	0	0	0	0	1	0.00194553	2	0.00537634	2	0.00353357	13	0.026694	1	0.0114943	9	0.0153846	0	0	30	0.0607287	7	0.027451	4	0.00904977	10	0.0227273	0	0	2	0.00400802	0
ACTG1	0	0	0	0	0	0	0	0	0	0	1	0.0016835	0	0	0	0	0	0	0	0	0	0	0	0	0	0	0	0	0	0	0	0	0	0	0	0	0	0	0	0	0	0	0	0	0	0	0	0	0
ACVRL1	0	0	0	0	1	0.000922509	0	0	0	0	2	0.003367	0	0	0	0	0	0	0	0	0	0	3	0.00583658	0	0	0	0	0	0	0	0	0	0	1	0.00543478	0	0	0	0	0	0	4	0.00909091	0	0	0	0	0
ADAMTS13	0	0	2	0.00486618	2	0.00184502	0	0	0	0	0	0	0	0	0	0	0	0	0	0	2	0.00390625	1	0.00194553	1	0.00268817	1	0.00176678	1	0.00205339	0	0	4	0.00683761	1	0.00543478	0	0	3	0.0117647	0	0	0	0	1	0.00671141	4	0.00801603	1
ADAMTS18	0	0	4	0.00973236	8	0.00738007	2	0.00673401	0	0	1	0.0016835	0	0	0	0	0	0	0	0	0	0	0	0	1	0.00268817	4	0.00706714	2	0.00410678	1	0.0114943	12	0.0205128	0	0	20	0.0404858	1	0.00392157	1	0.00226244	1	0.00227273	0	0	2	0.00400802	0
ADIPOR2	0	0	1	0.00243309	0	0	0	0	0	0	1	0.0016835	1	0.00549451	1	0.0017094	1	0.00191205	0	0	0	0	0	0	0	0	3	0.00530035	1	0.00205339	0	0	1	0.0017094	0	0	0	0	2	0.00784314	0	0	3	0.00681818	0	0	1	0.00200401	0
ADRA2A	0	0	5	0.0121655	1	0.000922509	0	0	0	0	4	0.00673401	0	0	0	0	0	0	0	0	0	0	6	0.0116732	1	0.00268817	2	0.00353357	1	0.00205339	2	0.0229885	0	0	0	0	2	0.00404858	0	0	2	0.00452489	1	0.00227273	0	0	0	0	0
ADRA2C	0	0	2	0.00486618	3	0.00276753	5	0.016835	0	0	1	0.0016835	3	0.0164835	0	0	3	0.00573614	0	0	0	0	0	0	0	0	3	0.00530035	4	0.00821355	0	0	1	0.0017094	0	0	1	0.00202429	1	0.00392157	2	0.00452489	3	0.00681818	0	0	0	0	0
ADRB1	0	0	4	0.00973236	0	0	0	0	0	0	4	0.00673401	1	0.00549451	0	0	0	0	0	0	0	0	8	0.0155642	0	0	1	0.00176678	1	0.00205339	1	0.0114943	0	0	0	0	4	0.00809717	1	0.00392157	2	0.00452489	0	0	0	0	0	0	0
ADRB2	0	0	0	0	1	0.000922509	0	0	0	0	1	0.0016835	0	0	0	0	1	0.00191205	0	0	0	0	0	0	0	0	2	0.00353357	3	0.00616016	0	0	1	0.0017094	0	0	2	0.00404858	1	0.00392157	1	0.00226244	0	0	0	0	0	0	0
ADTRP	0	0	3	0.00729927	2	0.00184502	2	0.00673401	0	0	1	0.0016835	2	0.010989	0	0	1	0.00191205	0	0	0	0	3	0.00583658	0	0	1	0.00176678	0	0	1	0.0114943	0	0	0	0	2	0.00404858	0	0	0	0	3	0.00681818	0	0	0	0	1
AGER	0	0	2	0.00486618	1	0.000922509	0	0	0	0	1	0.0016835	0	0	0	0	0	0	0	0	0	0	0	0	0	0	1	0.00176678	1	0.00205339	0	0	0	0	0	0	1	0.00202429	0	0	0	0	4	0.00909091	0	0	0	0	0
AHNAK2	0	0	6	0.0145985	2	0.00184502	2	0.00673401	1	0.0277778	1	0.0016835	2	0.010989	1	0.0017094	4	0.00764818	1	0.0153846	0	0	0	0	4	0.0107527	2	0.00353357	3	0.00616016	0	0	1	0.0017094	0	0	3	0.00607287	0	0	3	0.00678733	2	0.00454545	1	0.00671141	0	0	0
AJAP1	4	0.045977	1	0.00243309	3	0.00276753	3	0.010101	1	0.0277778	5	0.00841751	1	0.00549451	2	0.0034188	4	0.00764818	0	0	1	0.00195312	1	0.00194553	6	0.016129	2	0.00353357	5	0.0102669	1	0.0114943	2	0.0034188	3	0.0163043	1	0.00202429	3	0.0117647	4	0.00904977	3	0.00681818	2	0.0134228	1	0.00200401	0
AJUBA	0	0	4	0.00973236	0	0	0	0	0	0	0	0	0	0	0	0	0	0	0	0	0	0	0	0	0	0	0	0	0	0	0	0	0	0	0	0	0	0	0	0	0	0	0	0	0	0	0	0	0
ALOX12	2	0.0229885	3	0.00729927	1	0.000922509	1	0.003367	0	0	1	0.0016835	1	0.00549451	1	0.0017094	2	0.00382409	0	0	0	0	0	0	0	0	1	0.00176678	1	0.00205339	0	0	1	0.0017094	0	0	7	0.01417	2	0.00784314	4	0.00904977	1	0.00227273	1	0.00671141	3	0.00601202	0
ALOX15	2	0.0229885	4	0.00973236	6	0.00553506	2	0.00673401	0	0	8	0.013468	2	0.010989	0	0	2	0.00382409	0	0	0	0	1	0.00194553	9	0.0241935	6	0.0106007	2	0.00410678	0	0	0	0	0	0	12	0.0242915	1	0.00392157	2	0.00452489	3	0.00681818	0	0	2	0.00400802	2
ALOX5	0	0	4	0.00973236	3	0.00276753	3	0.010101	0	0	7	0.0117845	2	0.010989	0	0	1	0.00191205	0	0	0	0	0	0	8	0.0215054	6	0.0106007	3	0.00616016	0	0	1	0.0017094	0	0	6	0.0121457	0	0	1	0.00226244	3	0.00681818	0	0	2	0.00400802	1
ANO6	0	0	0	0	0	0	0	0	0	0	0	0	1	0.00549451	2	0.0034188	0	0	0	0	0	0	6	0.0116732	1	0.00268817	3	0.00530035	1	0.00205339	1	0.0114943	2	0.0034188	1	0.00543478	1	0.00202429	0	0	0	0	3	0.00681818	1	0.00671141	0	0	0
ANXA1	0	0	4	0.00973236	2	0.00184502	1	0.003367	0	0	1	0.0016835	0	0	1	0.0017094	2	0.00382409	0	0	0	0	0	0	1	0.00268817	3	0.00530035	5	0.0102669	0	0	2	0.0034188	0	0	0	0	0	0	0	0	2	0.00454545	0	0	1	0.00200401	1
ANXA2	0	0	2	0.00486618	2	0.00184502	0	0	0	0	1	0.0016835	1	0.00549451	2	0.0034188	0	0	0	0	0	0	0	0	0	0	2	0.00353357	2	0.00410678	0	0	4	0.00683761	0	0	0	0	0	0	0	0	2	0.00454545	0	0	0	0	0
ANXA5	0	0	0	0	0	0	0	0	0	0	3	0.00505051	0	0	0	0	1	0.00191205	0	0	0	0	2	0.00389105	0	0	0	0	1	0.00205339	1	0.0114943	4	0.00683761	0	0	11	0.0222672	1	0.00392157	0	0	2	0.00454545	0	0	0	0	0
ANXA6	0	0	0	0	1	0.000922509	0	0	0	0	1	0.0016835	0	0	1	0.0017094	1	0.00191205	0	0	0	0	0	0	0	0	3	0.00530035	2	0.00410678	0	0	3	0.00512821	0	0	0	0	1	0.00392157	0	0	0	0	0	0	0	0	0
ANXA8	0	0	4	0.00973236	2	0.00184502	1	0.003367	0	0	1	0.0016835	2	0.010989	1	0.0017094	1	0.00191205	0	0	0	0	0	0	0	0	2	0.00353357	2	0.00410678	0	0	1	0.0017094	0	0	7	0.01417	2	0.00784314	3	0.00678733	3	0.00681818	1	0.00671141	3	0.00601202	0
AP3B1	0	0	5	0.0121655	3	0.00276753	0	0	0	0	0	0	2	0.010989	1	0.0017094	2	0.00382409	0	0	0	0	0	0	2	0.00537634	4	0.00706714	4	0.00821355	0	0	17	0.0290598	0	0	13	0.0263158	0	0	0	0	2	0.00454545	0	0	0	0	0
APOE	0	0	0	0	2	0.00184502	0	0	0	0	0	0	0	0	0	0	0	0	0	0	0	0	6	0.0116732	0	0	0	0	0	0	0	0	3	0.00512821	0	0	1	0.00202429	2	0.00784314	0	0	0	0	0	0	0	0	0
APOH	1	0.0114943	0	0	0	0	0	0	0	0	1	0.0016835	0	0	0	0	0	0	0	0	0	0	0	0	0	0	0	0	0	0	0	0	3	0.00512821	0	0	0	0	0	0	0	0	0	0	0	0	0	0	0
AQP1	0	0	2	0.00486618	0	0	0	0	0	0	0	0	0	0	0	0	0	0	0	0	0	0	0	0	0	0	3	0.00530035	1	0.00205339	0	0	2	0.0034188	0	0	0	0	0	0	0	0	0	0	0	0	0	0	0
ARFGEF1	0	0	0	0	0	0	0	0	0	0	1	0.0016835	0	0	1	0.0017094	0	0	0	0	0	0	0	0	0	0	1	0.00176678	0	0	0	0	0	0	0	0	0	0	0	0	0	0	0	0	0	0	0	0	0
ARHGAP24	0	0	1	0.00243309	0	0	2	0.00673401	0	0	2	0.003367	4	0.021978	0	0	3	0.00573614	0	0	1	0.00195312	0	0	2	0.00537634	1	0.00176678	5	0.0102669	0	0	6	0.0102564	0	0	0	0	2	0.00784314	2	0.00452489	5	0.0113636	1	0.00671141	0	0	0
ARHGAP35	0	0	0	0	2	0.00184502	0	0	0	0	0	0	0	0	0	0	0	0	0	0	1	0.00195312	7	0.0136187	0	0	0	0	1	0.00205339	0	0	3	0.00512821	0	0	3	0.00607287	4	0.0156863	0	0	1	0.00227273	0	0	0	0	1
ARHGEF19	0	0	0	0	3	0.00276753	1	0.003367	2	0.0555556	4	0.00673401	0	0	0	0	1	0.00191205	0	0	1	0.00195312	0	0	2	0.00537634	1	0.00176678	3	0.00616016	1	0.0114943	2	0.0034188	2	0.0108696	0	0	0	0	2	0.00452489	2	0.00454545	1	0.00671141	0	0	0
AXL	0	0	0	0	2	0.00184502	0	0	0	0	0	0	0	0	0	0	0	0	0	0	0	0	3	0.00583658	0	0	0	0	1	0.00205339	0	0	2	0.0034188	0	0	1	0.00202429	0	0	0	0	0	0	0	0	0	0	0
B4GALT1	1	0.0114943	0	0	1	0.000922509	1	0.003367	0	0	0	0	1	0.00549451	1	0.0017094	2	0.00382409	0	0	0	0	0	0	0	0	1	0.00176678	1	0.00205339	1	0.0114943	0	0	1	0.00543478	2	0.00404858	0	0	1	0.00226244	1	0.00227273	0	0	0	0	0
BLK	0	0	25	0.0608273	17	0.0156827	3	0.010101	1	0.0277778	20	0.03367	5	0.0274725	0	0	12	0.0229446	0	0	3	0.00585938	0	0	25	0.0672043	24	0.0424028	21	0.0431211	1	0.0114943	30	0.0512821	2	0.0108696	24	0.048583	4	0.0156863	1	0.00226244	5	0.0113636	1	0.00671141	0	0	0
BLOC1S3	0	0	0	0	1	0.000922509	0	0	0	0	0	0	0	0	0	0	0	0	0	0	1	0.00195312	8	0.0155642	0	0	0	0	0	0	0	0	3	0.00512821	0	0	1	0.00202429	2	0.00784314	0	0	0	0	0	0	0	0	0
BLOC1S4	0	0	2	0.00486618	3	0.00276753	5	0.016835	0	0	2	0.003367	4	0.021978	2	0.0034188	3	0.00573614	0	0	0	0	0	0	0	0	2	0.00353357	3	0.00616016	0	0	1	0.0017094	0	0	1	0.00202429	3	0.0117647	1	0.00226244	2	0.00454545	0	0	0	0	0
BLOC1S6	1	0.0114943	1	0.00243309	2	0.00184502	2	0.00673401	0	0	5	0.00841751	1	0.00549451	1	0.0017094	1	0.00191205	0	0	1	0.00195312	0	0	1	0.00268817	8	0.0141343	2	0.00410678	3	0.0344828	9	0.0153846	0	0	4	0.00809717	0	0	4	0.00904977	2	0.00454545	0	0	0	0	0
BNC1	0	0	1	0.00243309	0	0	0	0	0	0	0	0	1	0.00549451	0	0	0	0	0	0	0	0	1	0.00194553	0	0	0	0	0	0	0	0	0	0	0	0	0	0	0	0	0	0	0	0	0	0	0	0	0
C1GALT1C1	0	0	0	0	0	0	0	0	0	0	0	0	0	0	0	0	2	0.00382409	0	0	0	0	0	0	0	0	0	0	1	0.00205339	0	0	1	0.0017094	0	0	0	0	3	0.0117647	0	0	1	0.00227273	1	0.00671141	0	0	0
C1QTNF1	0	0	0	0	1	0.000922509	2	0.00673401	0	0	0	0	0	0	0	0	1	0.00191205	0	0	0	0	0	0	1	0.00268817	0	0	0	0	0	0	0	0	0	0	0	0	0	0	0	0	1	0.00227273	0	0	0	0	0
C3	0	0	0	0	2	0.00184502	6	0.020202	0	0	3	0.00505051	3	0.0164835	0	0	1	0.00191205	0	0	1	0.00195312	1	0.00194553	2	0.00537634	1	0.00176678	0	0	0	0	2	0.0034188	0	0	0	0	0	0	0	0	3	0.00681818	0	0	0	0	0
C9	0	0	0	0	2	0.00184502	0	0	0	0	0	0	0	0	0	0	0	0	0	0	0	0	0	0	0	0	0	0	0	0	0	0	0	0	0	0	0	0	0	0	0	0	1	0.00227273	0	0	0	0	0
CADM4	0	0	0	0	2	0.00184502	0	0	0	0	0	0	1	0.00549451	0	0	0	0	0	0	0	0	6	0.0116732	0	0	0	0	0	0	0	0	3	0.00512821	0	0	2	0.00404858	1	0.00392157	0	0	0	0	0	0	0	0	0
CARMIL2	0	0	2	0.00486618	6	0.00553506	1	0.003367	0	0	0	0	2	0.010989	0	0	0	0	0	0	0	0	0	0	0	0	1	0.00176678	0	0	0	0	11	0.0188034	0	0	7	0.01417	0	0	0	0	2	0.00454545	0	0	1	0.00200401	0
CASK	0	0	2	0.00486618	0	0	2	0.00673401	0	0	2	0.003367	8	0.043956	1	0.0017094	15	0.0286807	0	0	0	0	5	0.00972763	4	0.0107527	1	0.00176678	11	0.0225873	2	0.0229885	4	0.00683761	3	0.0163043	0	0	1	0.00392157	0	0	5	0.0113636	1	0.00671141	0	0	1
CAV1	0	0	1	0.00243309	1	0.000922509	0	0	0	0	1	0.0016835	2	0.010989	0	0	1	0.00191205	0	0	0	0	0	0	0	0	3	0.00530035	2	0.00410678	0	0	1	0.0017094	0	0	1	0.00202429	0	0	0	0	1	0.00227273	0	0	0	0	0
CAV3	0	0	0	0	0	0	1	0.003367	0	0	0	0	2	0.010989	0	0	0	0	0	0	13	0.0253906	0	0	0	0	1	0.00176678	1	0.00205339	0	0	1	0.0017094	0	0	4	0.00809717	1	0.00392157	1	0.00226244	2	0.00454545	0	0	0	0	1
CCL2	2	0.0229885	0	0	2	0.00184502	2	0.00673401	0	0	0	0	2	0.010989	2	0.0034188	0	0	0	0	0	0	0	0	2	0.00537634	0	0	3	0.00616016	0	0	8	0.0136752	0	0	2	0.00404858	3	0.0117647	0	0	0	0	0	0	0	0	0
CCM2L	0	0	0	0	0	0	0	0	0	0	0	0	0	0	0	0	0	0	0	0	0	0	0	0	0	0	0	0	0	0	0	0	0	0	0	0	0	0	0	0	0	0	0	0	0	0	0	0	0
CCN1	1	0.0114943	1	0.00243309	1	0.000922509	0	0	0	0	0	0	2	0.010989	1	0.0017094	0	0	0	0	0	0	0	0	0	0	3	0.00530035	0	0	0	0	4	0.00683761	0	0	0	0	1	0.00392157	0	0	0	0	0	0	0	0	0
CCN4	0	0	0	0	0	0	0	0	0	0	1	0.0016835	0	0	1	0.0017094	0	0	0	0	0	0	1	0.00194553	1	0.00268817	0	0	0	0	0	0	1	0.0017094	0	0	2	0.00404858	1	0.00392157	0	0	0	0	0	0	2	0.00400802	0
CCR2	0	0	1	0.00243309	2	0.00184502	1	0.003367	0	0	0	0	1	0.00549451	0	0	1	0.00191205	0	0	13	0.0253906	7	0.0136187	1	0.00268817	0	0	0	0	1	0.0114943	1	0.0017094	1	0.00543478	4	0.00809717	3	0.0117647	0	0	2	0.00454545	0	0	0	0	1
CD109	0	0	2	0.00486618	1	0.000922509	0	0	0	0	1	0.0016835	1	0.00549451	0	0	0	0	0	0	0	0	0	0	1	0.00268817	4	0.00706714	0	0	0	0	1	0.0017094	0	0	1	0.00202429	2	0.00784314	0	0	2	0.00454545	0	0	0	0	0
CD151	1	0.0114943	2	0.00486618	0	0	1	0.003367	0	0	0	0	0	0	0	0	0	0	0	0	0	0	1	0.00194553	0	0	0	0	0	0	0	0	1	0.0017094	0	0	1	0.00202429	3	0.0117647	0	0	0	0	1	0.00671141	0	0	0
CD34	0	0	0	0	1	0.000922509	0	0	0	0	0	0	0	0	0	0	0	0	0	0	0	0	1	0.00194553	0	0	1	0.00176678	1	0.00205339	0	0	5	0.00854701	0	0	1	0.00202429	1	0.00392157	0	0	0	0	0	0	1	0.00200401	0
CD36	0	0	1	0.00243309	0	0	0	0	0	0	0	0	0	0	0	0	1	0.00191205	0	0	0	0	0	0	2	0.00537634	0	0	1	0.00205339	0	0	1	0.0017094	0	0	0	0	4	0.0156863	0	0	2	0.00454545	0	0	0	0	0
CD40LG	0	0	0	0	0	0	0	0	0	0	1	0.0016835	1	0.00549451	0	0	0	0	0	0	0	0	2	0.00389105	0	0	0	0	0	0	0	0	1	0.0017094	0	0	5	0.0101215	2	0.00784314	0	0	1	0.00227273	0	0	0	0	0
CD44	0	0	2	0.00486618	2	0.00184502	0	0	0	0	1	0.0016835	0	0	0	0	2	0.00382409	0	0	2	0.00390625	0	0	7	0.0188172	3	0.00530035	1	0.00205339	0	0	0	0	0	0	18	0.0364372	0	0	3	0.00678733	1	0.00227273	0	0	0	0	0
CD9	0	0	0	0	1	0.000922509	1	0.003367	0	0	2	0.003367	1	0.00549451	2	0.0034188	0	0	0	0	0	0	12	0.0233463	0	0	1	0.00176678	2	0.00410678	0	0	6	0.0102564	0	0	0	0	2	0.00784314	0	0	2	0.00454545	2	0.0134228	1	0.00200401	0
CDKN1A	0	0	1	0.00243309	0	0	0	0	0	0	1	0.0016835	0	0	0	0	0	0	0	0	0	0	0	0	0	0	0	0	0	0	0	0	0	0	0	0	0	0	2	0.00784314	0	0	0	0	0	0	0	0	0
CEACAM1	0	0	0	0	1	0.000922509	0	0	0	0	0	0	1	0.00549451	0	0	0	0	0	0	0	0	5	0.00972763	0	0	1	0.00176678	0	0	0	0	3	0.00512821	0	0	8	0.0161943	0	0	0	0	0	0	0	0	0	0	0
CELA2A	1	0.0114943	0	0	3	0.00276753	1	0.003367	2	0.0555556	3	0.00505051	0	0	0	0	3	0.00573614	0	0	1	0.00195312	0	0	1	0.00268817	1	0.00176678	4	0.00821355	1	0.0114943	2	0.0034188	2	0.0108696	0	0	0	0	2	0.00452489	1	0.00227273	1	0.00671141	0	0	0
CELSR1	0	0	7	0.0170316	3	0.00276753	4	0.013468	0	0	2	0.003367	2	0.010989	3	0.00512821	1	0.00191205	0	0	0	0	5	0.00972763	1	0.00268817	5	0.00883392	3	0.00616016	0	0	29	0.0495726	2	0.0108696	3	0.00607287	2	0.00784314	1	0.00226244	8	0.0181818	2	0.0134228	0	0	1
CFH	0	0	1	0.00243309	1	0.000922509	0	0	0	0	0	0	0	0	0	0	0	0	0	0	0	0	0	0	0	0	0	0	0	0	0	0	0	0	0	0	1	0.00202429	0	0	2	0.00452489	3	0.00681818	0	0	0	0	0
CFLAR	0	0	5	0.0121655	1	0.000922509	1	0.003367	0	0	0	0	0	0	1	0.0017094	3	0.00573614	0	0	1	0.00195312	0	0	0	0	0	0	0	0	0	0	0	0	0	0	0	0	1	0.00392157	1	0.00226244	4	0.00909091	0	0	0	0	0
CLASP1	0	0	1	0.00243309	0	0	0	0	0	0	0	0	1	0.00549451	0	0	0	0	0	0	0	0	0	0	0	0	0	0	0	0	0	0	2	0.0034188	0	0	14	0.0283401	1	0.00392157	0	0	3	0.00681818	0	0	0	0	1
CLASP2	0	0	0	0	0	0	0	0	0	0	0	0	1	0.00549451	0	0	2	0.00382409	0	0	13	0.0253906	2	0.00389105	0	0	0	0	0	0	0	0	1	0.0017094	0	0	0	0	0	0	0	0	1	0.00227273	0	0	0	0	1
CLDN1	0	0	0	0	1	0.000922509	0	0	0	0	0	0	0	0	0	0	0	0	0	0	0	0	2	0.00389105	0	0	3	0.00530035	0	0	0	0	0	0	0	0	5	0.0101215	0	0	1	0.00226244	1	0.00227273	0	0	0	0	0
CLDN19	0	0	0	0	0	0	0	0	0	0	0	0	0	0	0	0	0	0	0	0	0	0	1	0.00194553	0	0	2	0.00353357	1	0.00205339	0	0	2	0.0034188	0	0	0	0	1	0.00392157	0	0	2	0.00454545	0	0	1	0.00200401	0
CLDN3	0	0	0	0	0	0	0	0	0	0	0	0	0	0	0	0	0	0	0	0	0	0	1	0.00194553	0	0	2	0.00353357	1	0.00205339	0	0	2	0.0034188	0	0	0	0	1	0.00392157	0	0	2	0.00454545	0	0	1	0.00200401	0
CLDN4	0	0	0	0	0	0	0	0	0	0	0	0	0	0	0	0	0	0	0	0	0	0	0	0	0	0	0	0	0	0	0	0	1	0.0017094	0	0	0	0	0	0	0	0	0	0	0	0	0	0	0
CLEC10A	2	0.0229885	4	0.00973236	5	0.00461255	2	0.00673401	0	0	8	0.013468	2	0.010989	0	0	1	0.00191205	0	0	0	0	1	0.00194553	9	0.0241935	6	0.0106007	2	0.00410678	0	0	0	0	1	0.00543478	13	0.0263158	1	0.00392157	2	0.00452489	3	0.00681818	0	0	2	0.00400802	2
CNN2	0	0	2	0.00486618	3	0.00276753	11	0.037037	0	0	3	0.00505051	3	0.0164835	2	0.0034188	2	0.00382409	0	0	1	0.00195312	0	0	2	0.00537634	2	0.00353357	2	0.00410678	0	0	16	0.0273504	0	0	0	0	6	0.0235294	1	0.00226244	4	0.00909091	1	0.00671141	0	0	0
COL1A1	0	0	0	0	0	0	0	0	0	0	0	0	0	0	1	0.0017094	1	0.00191205	0	0	0	0	0	0	0	0	0	0	0	0	0	0	1	0.0017094	0	0	0	0	1	0.00392157	0	0	0	0	0	0	0	0	0
COL3A1	0	0	2	0.00486618	0	0	0	0	0	0	2	0.003367	0	0	1	0.0017094	0	0	0	0	1	0.00195312	0	0	0	0	0	0	1	0.00205339	0	0	0	0	0	0	0	0	2	0.00784314	0	0	4	0.00909091	0	0	0	0	0
COL5A1	0	0	3	0.00729927	2	0.00184502	1	0.003367	0	0	1	0.0016835	0	0	0	0	2	0.00382409	0	0	2	0.00390625	1	0.00194553	2	0.00537634	1	0.00176678	1	0.00205339	0	0	4	0.00683761	0	0	0	0	2	0.00784314	0	0	0	0	1	0.00671141	5	0.01002	1
COMP	0	0	0	0	0	0	2	0.00673401	0	0	3	0.00505051	0	0	0	0	0	0	0	0	0	0	0	0	1	0.00268817	1	0.00176678	0	0	0	0	1	0.0017094	0	0	1	0.00202429	1	0.00392157	0	0	0	0	0	0	1	0.00200401	0
CORO1B	0	0	0	0	0	0	0	0	0	0	1	0.0016835	1	0.00549451	0	0	0	0	0	0	0	0	0	0	0	0	0	0	0	0	0	0	0	0	0	0	0	0	0	0	1	0.00226244	0	0	1	0.00671141	0	0	0
CPB2	0	0	20	0.0486618	6	0.00553506	6	0.020202	0	0	3	0.00505051	2	0.010989	4	0.00683761	2	0.00382409	0	0	1	0.00195312	5	0.00972763	5	0.0134409	3	0.00530035	2	0.00410678	0	0	7	0.0119658	0	0	38	0.0769231	6	0.0235294	1	0.00226244	2	0.00454545	0	0	0	0	0
CRK	2	0.0229885	6	0.0145985	2	0.00184502	3	0.010101	0	0	6	0.010101	2	0.010989	0	0	1	0.00191205	0	0	0	0	0	0	8	0.0215054	7	0.0123675	2	0.00410678	0	0	7	0.0119658	1	0.00543478	2	0.00404858	0	0	2	0.00452489	5	0.0113636	0	0	2	0.00400802	1
CRP	0	0	0	0	0	0	0	0	0	0	0	0	0	0	0	0	0	0	0	0	0	0	0	0	0	0	0	0	0	0	0	0	0	0	0	0	3	0.00607287	0	0	0	0	0	0	0	0	0	0	0
CX3CL1	0	0	3	0.00729927	5	0.00461255	1	0.003367	0	0	0	0	1	0.00549451	1	0.0017094	0	0	0	0	0	0	0	0	1	0.00268817	2	0.00353357	0	0	0	0	3	0.00512821	0	0	7	0.01417	1	0.00392157	1	0.00226244	1	0.00227273	0	0	0	0	0
CXADR	0	0	4	0.00973236	5	0.00461255	0	0	0	0	4	0.00673401	6	0.032967	0	0	6	0.0114723	0	0	0	0	2	0.00389105	1	0.00268817	3	0.00530035	6	0.0123203	1	0.0114943	5	0.00854701	2	0.0108696	1	0.00202429	3	0.0117647	2	0.00452489	10	0.0227273	0	0	0	0	0
CXCR4	0	0	1	0.00243309	0	0	0	0	0	0	1	0.0016835	1	0.00549451	0	0	1	0.00191205	0	0	0	0	0	0	1	0.00268817	0	0	0	0	1	0.0114943	1	0.0017094	0	0	16	0.0323887	0	0	0	0	2	0.00454545	0	0	0	0	1
DCBLD2	0	0	0	0	0	0	0	0	0	0	0	0	0	0	0	0	1	0.00191205	0	0	0	0	3	0.00583658	0	0	0	0	1	0.00205339	0	0	0	0	0	0	1	0.00202429	2	0.00784314	0	0	0	0	0	0	0	0	0
DDR1	0	0	0	0	2	0.00184502	0	0	0	0	0	0	0	0	0	0	0	0	0	0	0	0	0	0	0	0	0	0	0	0	0	0	0	0	0	0	0	0	0	0	0	0	4	0.00909091	0	0	0	0	0
DMTN	0	0	23	0.0559611	14	0.0129151	5	0.016835	1	0.0277778	21	0.0353535	5	0.0274725	0	0	10	0.0191205	0	0	4	0.0078125	1	0.00194553	24	0.0645161	24	0.0424028	19	0.0390144	0	0	26	0.0444444	2	0.0108696	32	0.0647773	1	0.00392157	2	0.00452489	5	0.0113636	1	0.00671141	0	0	0
DRD5	0	0	1	0.00243309	3	0.00276753	3	0.010101	0	0	1	0.0016835	1	0.00549451	1	0.0017094	3	0.00573614	0	0	0	0	0	0	0	0	3	0.00530035	2	0.00410678	1	0.0114943	1	0.0017094	0	0	0	0	2	0.00784314	1	0.00226244	2	0.00454545	0	0	0	0	0
DSP	2	0.0229885	2	0.00486618	2	0.00184502	2	0.00673401	0	0	0	0	3	0.0164835	1	0.0017094	0	0	0	0	0	0	2	0.00389105	1	0.00268817	1	0.00176678	2	0.00410678	0	0	2	0.0034188	0	0	4	0.00809717	0	0	0	0	3	0.00681818	0	0	0	0	4
DST	0	0	0	0	3	0.00276753	1	0.003367	0	0	0	0	1	0.00549451	0	0	1	0.00191205	0	0	1	0.00195312	0	0	0	0	1	0.00176678	0	0	0	0	0	0	0	0	3	0.00607287	1	0.00392157	2	0.00452489	0	0	0	0	0	0	0
DTNBP1	0	0	0	0	1	0.000922509	2	0.00673401	0	0	1	0.0016835	2	0.010989	0	0	0	0	0	0	0	0	1	0.00194553	0	0	1	0.00176678	1	0.00205339	1	0.0114943	1	0.0017094	0	0	0	0	0	0	1	0.00226244	4	0.00909091	5	0.033557	0	0	0
DUOX1	1	0.0114943	1	0.00243309	1	0.000922509	2	0.00673401	0	0	6	0.010101	1	0.00549451	1	0.0017094	1	0.00191205	0	0	1	0.00195312	0	0	0	0	8	0.0141343	2	0.00410678	4	0.045977	9	0.0153846	0	0	4	0.00809717	0	0	4	0.00904977	2	0.00454545	0	0	0	0	0
DUOX2	1	0.0114943	1	0.00243309	1	0.000922509	2	0.00673401	0	0	6	0.010101	1	0.00549451	1	0.0017094	1	0.00191205	0	0	1	0.00195312	0	0	0	0	8	0.0141343	2	0.00410678	4	0.045977	9	0.0153846	0	0	4	0.00809717	0	0	5	0.0113122	1	0.00227273	0	0	0	0	0
DUSP10	0	0	1	0.00243309	0	0	2	0.00673401	0	0	0	0	0	0	1	0.0017094	0	0	0	0	0	0	0	0	0	0	0	0	0	0	0	0	0	0	1	0.00543478	5	0.0101215	3	0.0117647	1	0.00226244	0	0	1	0.00671141	0	0	0
DYSF	0	0	0	0	0	0	0	0	0	0	0	0	0	0	0	0	0	0	0	0	0	0	0	0	2	0.00537634	0	0	0	0	0	0	0	0	0	0	2	0.00404858	0	0	0	0	0	0	0	0	0	0	0
EGFR	0	0	0	0	0	0	0	0	0	0	0	0	1	0.00549451	0	0	0	0	0	0	0	0	0	0	0	0	3	0.00530035	1	0.00205339	0	0	1	0.0017094	0	0	1	0.00202429	0	0	1	0.00226244	1	0.00227273	0	0	0	0	0
ELK3	0	0	0	0	0	0	0	0	0	0	0	0	0	0	0	0	0	0	0	0	0	0	0	0	0	0	1	0.00176678	0	0	0	0	1	0.0017094	0	0	1	0.00202429	1	0.00392157	0	0	0	0	0	0	0	0	0
ENG	0	0	1	0.00243309	1	0.000922509	0	0	0	0	0	0	0	0	0	0	0	0	0	0	0	0	0	0	0	0	1	0.00176678	0	0	0	0	2	0.0034188	1	0.00543478	0	0	0	0	0	0	1	0.00227273	0	0	4	0.00801603	0
ENPP4	0	0	0	0	2	0.00184502	0	0	0	0	2	0.003367	1	0.00549451	0	0	0	0	0	0	0	0	0	0	0	0	0	0	0	0	0	0	3	0.00512821	0	0	1	0.00202429	0	0	0	0	1	0.00227273	0	0	0	0	0
ENTPD1	0	0	2	0.00486618	2	0.00184502	1	0.003367	0	0	4	0.00673401	0	0	0	0	2	0.00382409	0	0	0	0	0	0	0	0	1	0.00176678	2	0.00410678	0	0	1	0.0017094	0	0	7	0.01417	1	0.00392157	1	0.00226244	3	0.00681818	0	0	0	0	0
ENTPD2	0	0	3	0.00729927	1	0.000922509	1	0.003367	0	0	1	0.0016835	0	0	0	0	2	0.00382409	0	0	2	0.00390625	1	0.00194553	2	0.00537634	1	0.00176678	1	0.00205339	0	0	3	0.00512821	0	0	0	0	2	0.00784314	0	0	0	0	1	0.00671141	4	0.00801603	1
EPB41L4B	0	0	3	0.00729927	0	0	0	0	0	0	0	0	0	0	0	0	0	0	0	0	0	0	0	0	0	0	0	0	0	0	0	0	1	0.0017094	0	0	0	0	0	0	0	0	1	0.00227273	0	0	4	0.00801603	0
EPHB2	0	0	0	0	2	0.00184502	1	0.003367	1	0.0277778	2	0.003367	0	0	0	0	0	0	0	0	1	0.00195312	0	0	1	0.00268817	2	0.00353357	2	0.00410678	1	0.0114943	1	0.0017094	2	0.0108696	1	0.00202429	0	0	2	0.00452489	4	0.00909091	1	0.00671141	0	0	1
EPPK1	0	0	0	0	0	0	0	0	0	0	0	0	1	0.00549451	0	0	0	0	0	0	0	0	7	0.0136187	0	0	2	0.00353357	0	0	0	0	1	0.0017094	1	0.00543478	0	0	0	0	1	0.00226244	0	0	1	0.00671141	2	0.00400802	0
ERBB2	2	0.0229885	0	0	0	0	1	0.003367	0	0	0	0	0	0	1	0.0017094	0	0	0	0	0	0	0	0	1	0.00268817	0	0	1	0.00205339	0	0	4	0.00683761	0	0	2	0.00404858	0	0	0	0	0	0	0	0	0	0	0
EVL	0	0	4	0.00973236	2	0.00184502	2	0.00673401	1	0.0277778	1	0.0016835	1	0.00549451	1	0.0017094	2	0.00382409	1	0.0153846	0	0	0	0	2	0.00537634	2	0.00353357	2	0.00410678	0	0	2	0.0034188	0	0	5	0.0101215	0	0	3	0.00678733	2	0.00454545	1	0.00671141	0	0	0
EVPL	0	0	0	0	1	0.000922509	1	0.003367	0	0	0	0	0	0	0	0	0	0	0	0	0	0	0	0	0	0	0	0	0	0	0	0	0	0	0	0	1	0.00202429	0	0	1	0.00226244	1	0.00227273	0	0	0	0	0
EXT1	0	0	0	0	2	0.00184502	0	0	0	0	0	0	0	0	0	0	0	0	0	0	1	0.00195312	1	0.00194553	1	0.00268817	0	0	0	0	1	0.0114943	3	0.00512821	0	0	1	0.00202429	2	0.00784314	0	0	2	0.00454545	1	0.00671141	2	0.00400802	0
F10	1	0.0114943	0	0	1	0.000922509	1	0.003367	0	0	0	0	1	0.00549451	1	0.0017094	0	0	0	0	0	0	1	0.00194553	0	0	0	0	0	0	0	0	1	0.0017094	0	0	3	0.00607287	1	0.00392157	0	0	1	0.00227273	0	0	0	0	0
F11	2	0.0229885	4	0.00973236	3	0.00276753	0	0	0	0	1	0.0016835	2	0.010989	1	0.0017094	2	0.00382409	0	0	0	0	0	0	0	0	2	0.00353357	4	0.00821355	0	0	17	0.0290598	0	0	13	0.0263158	0	0	0	0	2	0.00454545	1	0.00671141	0	0	0
F11R	0	0	5	0.0121655	3	0.00276753	0	0	0	0	1	0.0016835	2	0.010989	1	0.0017094	2	0.00382409	0	0	0	0	0	0	0	0	2	0.00353357	4	0.00821355	0	0	18	0.0307692	0	0	13	0.0263158	0	0	0	0	2	0.00454545	1	0.00671141	0	0	0
F12	0	0	5	0.0121655	4	0.00369004	0	0	0	0	1	0.0016835	2	0.010989	1	0.0017094	2	0.00382409	0	0	0	0	0	0	1	0.00268817	3	0.00530035	4	0.00821355	0	0	18	0.0307692	0	0	13	0.0263158	0	0	0	0	2	0.00454545	0	0	0	0	0
F13A1	0	0	1	0.00243309	0	0	1	0.003367	0	0	3	0.00505051	0	0	0	0	0	0	0	0	0	0	0	0	1	0.00268817	0	0	0	0	0	0	0	0	0	0	2	0.00404858	0	0	0	0	0	0	0	0	1	0.00200401	0
F13B	0	0	0	0	1	0.000922509	1	0.003367	0	0	0	0	1	0.00549451	0	0	0	0	0	0	0	0	0	0	0	0	4	0.00706714	0	0	0	0	2	0.0034188	0	0	2	0.00404858	3	0.0117647	0	0	1	0.00227273	1	0.00671141	0	0	0
F2	0	0	0	0	0	0	0	0	0	0	0	0	0	0	0	0	0	0	0	0	0	0	0	0	0	0	1	0.00176678	0	0	0	0	0	0	0	0	4	0.00809717	1	0.00392157	0	0	0	0	0	0	0	0	0
F2R	0	0	0	0	3	0.00276753	0	0	0	0	1	0.0016835	1	0.00549451	0	0	0	0	0	0	0	0	0	0	0	0	6	0.0106007	4	0.00821355	0	0	2	0.0034188	0	0	3	0.00607287	2	0.00784314	1	0.00226244	0	0	1	0.00671141	0	0	0
F2RL1	0	0	2	0.00486618	1	0.000922509	0	0	0	0	1	0.0016835	1	0.00549451	1	0.0017094	2	0.00382409	0	0	0	0	0	0	3	0.00806452	1	0.00176678	3	0.00616016	1	0.0114943	4	0.00683761	0	0	1	0.00202429	8	0.0313725	1	0.00226244	4	0.00909091	0	0	2	0.00400802	0
F2RL2	0	0	0	0	0	0	2	0.00673401	0	0	0	0	2	0.010989	1	0.0017094	1	0.00191205	0	0	0	0	0	0	1	0.00268817	0	0	3	0.00616016	0	0	2	0.0034188	0	0	4	0.00809717	6	0.0235294	0	0	1	0.00227273	0	0	0	0	0
F2RL3	0	0	0	0	3	0.00276753	0	0	0	0	1	0.0016835	1	0.00549451	0	0	0	0	0	0	0	0	1	0.00194553	0	0	6	0.0106007	4	0.00821355	0	0	2	0.0034188	0	0	3	0.00607287	2	0.00784314	1	0.00226244	0	0	1	0.00671141	0	0	0
F3	0	0	12	0.0291971	5	0.00461255	9	0.030303	0	0	12	0.020202	7	0.0384615	0	0	18	0.0344168	0	0	0	0	9	0.0175097	12	0.0322581	8	0.0141343	24	0.0492813	0	0	13	0.0222222	2	0.0108696	0	0	8	0.0313725	4	0.00904977	15	0.0340909	0	0	0	0	1
F5	0	0	0	0	0	0	0	0	0	0	0	0	0	0	0	0	0	0	0	0	0	0	0	0	0	0	0	0	0	0	0	0	0	0	0	0	3	0.00607287	0	0	1	0.00226244	0	0	0	0	0	0	0
F7	1	0.0114943	3	0.00729927	0	0	0	0	0	0	0	0	0	0	0	0	1	0.00191205	0	0	0	0	2	0.00389105	0	0	6	0.0106007	5	0.0102669	0	0	3	0.00512821	0	0	0	0	1	0.00392157	1	0.00226244	3	0.00681818	1	0.00671141	0	0	0
F8	1	0.0114943	1	0.00243309	3	0.00276753	2	0.00673401	0	0	0	0	3	0.0164835	0	0	0	0	0	0	0	0	2	0.00389105	1	0.00268817	1	0.00176678	1	0.00205339	0	0	2	0.0034188	0	0	5	0.0101215	0	0	0	0	3	0.00681818	0	0	0	0	4
F9	1	0.0114943	1	0.00243309	0	0	0	0	0	0	0	0	0	0	0	0	0	0	0	0	0	0	0	0	0	0	0	0	0	0	0	0	0	0	0	0	1	0.00202429	0	0	2	0.00452489	1	0.00227273	0	0	0	0	0
FBLN1	0	0	6	0.0145985	2	0.00184502	2	0.00673401	0	0	2	0.003367	2	0.010989	3	0.00512821	0	0	0	0	0	0	4	0.0077821	1	0.00268817	3	0.00530035	4	0.00821355	0	0	26	0.0444444	2	0.0108696	3	0.00607287	1	0.00392157	1	0.00226244	6	0.0136364	2	0.0134228	0	0	1
FCER1G	0	0	0	0	0	0	0	0	0	0	0	0	0	0	0	0	0	0	0	0	0	0	0	0	0	0	0	0	0	0	0	0	0	0	0	0	4	0.00809717	0	0	1	0.00226244	0	0	0	0	0	0	0
FER1L5	0	0	0	0	0	0	0	0	0	0	0	0	1	0.00549451	0	0	0	0	0	0	0	0	0	0	0	0	0	0	0	0	0	0	0	0	0	0	1	0.00202429	0	0	0	0	0	0	0	0	0	0	0
FERMT1	1	0.0114943	1	0.00243309	0	0	0	0	0	0	1	0.0016835	0	0	0	0	1	0.00191205	0	0	0	0	0	0	0	0	3	0.00530035	0	0	0	0	1	0.0017094	1	0.00543478	0	0	0	0	0	0	0	0	0	0	0	0	0
FERMT2	0	0	0	0	0	0	0	0	0	0	0	0	0	0	0	0	0	0	0	0	0	0	0	0	0	0	0	0	1	0.00205339	1	0.0114943	1	0.0017094	0	0	0	0	0	0	0	0	1	0.00227273	0	0	0	0	0
FERMT3	0	0	0	0	1	0.000922509	0	0	0	0	1	0.0016835	0	0	0	0	2	0.00382409	0	0	0	0	0	0	1	0.00268817	1	0.00176678	1	0.00205339	0	0	0	0	1	0.00543478	1	0.00202429	0	0	0	0	1	0.00227273	0	0	0	0	0
FGA	0	0	4	0.00973236	0	0	2	0.00673401	0	0	3	0.00505051	1	0.00549451	0	0	5	0.00956023	0	0	0	0	7	0.0136187	0	0	2	0.00353357	5	0.0102669	0	0	5	0.00854701	1	0.00543478	2	0.00404858	1	0.00392157	1	0.00226244	0	0	0	0	0	0	1
FGB	0	0	4	0.00973236	0	0	2	0.00673401	0	0	3	0.00505051	1	0.00549451	0	0	5	0.00956023	0	0	0	0	7	0.0136187	0	0	2	0.00353357	5	0.0102669	0	0	5	0.00854701	1	0.00543478	2	0.00404858	1	0.00392157	1	0.00226244	0	0	0	0	0	0	1
FGF1	0	0	0	0	0	0	0	0	0	0	0	0	0	0	0	0	1	0.00191205	0	0	0	0	0	0	1	0.00268817	2	0.00353357	2	0.00410678	1	0.0114943	1	0.0017094	1	0.00543478	1	0.00202429	1	0.00392157	1	0.00226244	0	0	0	0	0	0	0
FGF10	0	0	1	0.00243309	1	0.000922509	0	0	0	0	3	0.00505051	1	0.00549451	0	0	2	0.00382409	0	0	0	0	3	0.00583658	0	0	0	0	1	0.00205339	0	0	3	0.00512821	0	0	11	0.0222672	1	0.00392157	0	0	2	0.00454545	0	0	0	0	0
FGF2	0	0	2	0.00486618	2	0.00184502	2	0.00673401	0	0	2	0.003367	0	0	1	0.0017094	1	0.00191205	0	0	0	0	1	0.00194553	0	0	4	0.00706714	0	0	2	0.0229885	7	0.0119658	2	0.0108696	3	0.00607287	0	0	4	0.00904977	2	0.00454545	0	0	0	0	0
FGF7	0	0	0	0	2	0.00184502	0	0	0	0	1	0.0016835	0	0	0	0	1	0.00191205	0	0	0	0	0	0	0	0	0	0	0	0	0	0	0	0	0	0	0	0	0	0	1	0.00226244	1	0.00227273	0	0	0	0	0
FGFR1OP2	0	0	1	0.00243309	1	0.000922509	0	0	0	0	1	0.0016835	1	0.00549451	0	0	1	0.00191205	0	0	0	0	0	0	0	0	1	0.00176678	0	0	0	0	0	0	0	0	0	0	2	0.00784314	0	0	0	0	0	0	0	0	0
FGG	0	0	4	0.00973236	0	0	2	0.00673401	0	0	3	0.00505051	1	0.00549451	0	0	5	0.00956023	0	0	0	0	7	0.0136187	0	0	2	0.00353357	5	0.0102669	0	0	5	0.00854701	1	0.00543478	3	0.00607287	1	0.00392157	1	0.00226244	0	0	0	0	0	0	1
FKBP10	2	0.0229885	0	0	2	0.00184502	1	0.003367	0	0	0	0	0	0	1	0.0017094	0	0	0	0	0	0	0	0	1	0.00268817	0	0	2	0.00410678	0	0	4	0.00683761	0	0	4	0.00809717	0	0	0	0	0	0	0	0	0	0	0
FLNA	1	0.0114943	1	0.00243309	1	0.000922509	0	0	0	0	0	0	1	0.00549451	1	0.0017094	0	0	0	0	0	0	0	0	3	0.00806452	1	0.00176678	3	0.00616016	0	0	3	0.00512821	0	0	1	0.00202429	5	0.0196078	1	0.00226244	2	0.00454545	0	0	0	0	0
FN1	0	0	5	0.0121655	1	0.000922509	6	0.020202	0	0	0	0	1	0.00549451	1	0.0017094	6	0.0114723	0	0	1	0.00195312	1	0.00194553	0	0	0	0	4	0.00821355	0	0	0	0	0	0	1	0.00202429	2	0.00784314	0	0	0	0	0	0	0	0	0
FNTB	0	0	0	0	0	0	0	0	0	0	0	0	0	0	2	0.0034188	0	0	0	0	0	0	0	0	0	0	0	0	0	0	0	0	1	0.0017094	0	0	1	0.00202429	0	0	1	0.00226244	0	0	0	0	0	0	0
FOXA2	0	0	0	0	0	0	0	0	0	0	1	0.0016835	0	0	0	0	0	0	0	0	0	0	3	0.00583658	0	0	2	0.00353357	2	0.00410678	0	0	0	0	0	0	1	0.00202429	1	0.00392157	0	0	1	0.00227273	0	0	0	0	0
FOXC2	0	0	0	0	11	0.0101476	5	0.016835	0	0	1	0.0016835	1	0.00549451	2	0.0034188	0	0	0	0	0	0	1	0.00194553	1	0.00268817	9	0.0159011	1	0.00205339	1	0.0114943	11	0.0188034	0	0	25	0.0506073	2	0.00784314	2	0.00452489	3	0.00681818	1	0.00671141	3	0.00601202	1
FZD6	0	0	0	0	0	0	0	0	0	0	0	0	0	0	0	0	0	0	0	0	0	0	0	0	1	0.00268817	0	0	0	0	0	0	1	0.0017094	0	0	0	0	3	0.0117647	0	0	0	0	0	0	1	0.00200401	0
FZD7	0	0	2	0.00486618	2	0.00184502	3	0.010101	0	0	0	0	0	0	1	0.0017094	3	0.00573614	0	0	2	0.00390625	0	0	0	0	0	0	0	0	0	0	0	0	0	0	2	0.00404858	1	0.00392157	0	0	2	0.00454545	0	0	0	0	0
GAS6	0	0	0	0	3	0.00276753	0	0	0	0	1	0.0016835	1	0.00549451	0	0	0	0	0	0	0	0	2	0.00389105	0	0	7	0.0123675	5	0.0102669	0	0	4	0.00683761	0	0	4	0.00809717	5	0.0196078	4	0.00904977	0	0	0	0	0	0	0
GATA1	0	0	3	0.00729927	0	0	2	0.00673401	0	0	1	0.0016835	6	0.032967	1	0.0017094	10	0.0191205	0	0	0	0	4	0.0077821	4	0.0107527	1	0.00176678	6	0.0123203	0	0	1	0.0017094	1	0.00543478	0	0	1	0.00392157	0	0	3	0.00681818	1	0.00671141	0	0	1
GATA2	0	0	1	0.00243309	0	0	0	0	0	0	0	0	0	0	0	0	0	0	0	0	0	0	2	0.00389105	0	0	0	0	0	0	1	0.0114943	0	0	0	0	0	0	0	0	0	0	0	0	0	0	0	0	0
GATA4	0	0	24	0.0583942	17	0.0156827	3	0.010101	1	0.0277778	20	0.03367	5	0.0274725	1	0.0017094	13	0.0248566	0	0	3	0.00585938	0	0	25	0.0672043	24	0.0424028	21	0.0431211	0	0	28	0.0478632	2	0.0108696	24	0.048583	4	0.0156863	1	0.00226244	5	0.0113636	1	0.00671141	0	0	0
GJA1	0	0	5	0.0121655	1	0.000922509	0	0	0	0	0	0	0	0	0	0	2	0.00382409	0	0	1	0.00195312	0	0	5	0.0134409	1	0.00176678	0	0	0	0	0	0	1	0.00543478	18	0.0364372	0	0	3	0.00678733	1	0.00227273	0	0	0	0	0
GNA13	0	0	0	0	0	0	0	0	0	0	0	0	0	0	0	0	0	0	0	0	0	0	0	0	0	0	0	0	0	0	0	0	2	0.0034188	0	0	0	0	1	0.00392157	0	0	1	0.00227273	0	0	0	0	0
GNAS	0	0	0	0	0	0	0	0	0	0	0	0	0	0	0	0	0	0	0	0	0	0	0	0	0	0	0	0	0	0	0	0	0	0	0	0	1	0.00202429	0	0	0	0	1	0.00227273	0	0	0	0	0
GP1BA	2	0.0229885	4	0.00973236	3	0.00276753	3	0.010101	0	0	7	0.0117845	2	0.010989	0	0	2	0.00382409	0	0	0	0	0	0	8	0.0215054	6	0.0106007	2	0.00410678	0	0	0	0	0	0	5	0.0101215	0	0	1	0.00226244	4	0.00909091	0	0	2	0.00400802	1
GP1BB	2	0.0229885	2	0.00486618	2	0.00184502	0	0	0	0	1	0.0016835	2	0.010989	2	0.0034188	0	0	0	0	0	0	0	0	1	0.00268817	3	0.00530035	3	0.00616016	0	0	2	0.0034188	0	0	1	0.00202429	1	0.00392157	0	0	2	0.00454545	0	0	0	0	1
GP5	0	0	1	0.00243309	0	0	0	0	0	0	0	0	0	0	0	0	0	0	0	0	0	0	2	0.00389105	0	0	6	0.0106007	0	0	0	0	2	0.0034188	0	0	8	0.0161943	0	0	1	0.00226244	2	0.00454545	0	0	0	0	0
GP6	0	0	0	0	1	0.000922509	0	0	0	0	0	0	2	0.010989	1	0.0017094	0	0	0	0	1	0.00195312	17	0.0330739	0	0	0	0	0	0	0	0	1	0.0017094	1	0.00543478	0	0	1	0.00392157	0	0	0	0	0	0	0	0	0
GP9	0	0	1	0.00243309	0	0	0	0	0	0	0	0	0	0	0	0	0	0	0	0	0	0	2	0.00389105	0	0	0	0	0	0	1	0.0114943	0	0	0	0	1	0.00202429	0	0	0	0	0	0	0	0	0	0	0
GPR4	0	0	0	0	1	0.000922509	0	0	0	0	0	0	0	0	0	0	0	0	0	0	1	0.00195312	7	0.0136187	0	0	0	0	0	0	0	0	2	0.0034188	0	0	1	0.00202429	2	0.00784314	0	0	0	0	0	0	0	0	1
GPX1	0	0	4	0.00973236	2	0.00184502	1	0.003367	0	0	1	0.0016835	4	0.021978	0	0	1	0.00191205	0	0	13	0.0253906	5	0.00972763	1	0.00268817	0	0	2	0.00410678	1	0.0114943	3	0.00512821	1	0.00543478	2	0.00404858	5	0.0196078	0	0	5	0.0113636	0	0	0	0	0
GRHL3	0	0	0	0	1	0.000922509	1	0.003367	1	0.0277778	1	0.0016835	1	0.00549451	0	0	0	0	0	0	1	0.00195312	0	0	0	0	1	0.00176678	2	0.00410678	1	0.0114943	1	0.0017094	2	0.0108696	1	0.00202429	1	0.00392157	2	0.00452489	0	0	1	0.00671141	0	0	1
HBEGF	0	0	0	0	0	0	0	0	0	0	0	0	0	0	0	0	1	0.00191205	0	0	0	0	0	0	0	0	2	0.00353357	2	0.00410678	1	0.0114943	1	0.0017094	0	0	1	0.00202429	1	0.00392157	0	0	1	0.00227273	0	0	0	0	0
HGFAC	0	0	2	0.00486618	3	0.00276753	4	0.013468	0	0	1	0.0016835	3	0.0164835	0	0	3	0.00573614	0	0	0	0	0	0	1	0.00268817	3	0.00530035	4	0.00821355	0	0	1	0.0017094	0	0	0	0	1	0.00392157	2	0.00452489	3	0.00681818	0	0	0	0	0
HIF1A	0	0	0	0	0	0	0	0	0	0	0	0	0	0	1	0.0017094	0	0	0	0	0	0	0	0	0	0	0	0	1	0.00205339	0	0	3	0.00512821	0	0	1	0.00202429	0	0	1	0.00226244	0	0	0	0	0	0	0
HMGB1	1	0.0114943	3	0.00729927	1	0.000922509	2	0.00673401	0	0	0	0	0	0	1	0.0017094	0	0	0	0	1	0.00195312	3	0.00583658	1	0.00268817	3	0.00530035	0	0	0	0	0	0	0	0	1	0.00202429	7	0.027451	0	0	1	0.00227273	0	0	1	0.00200401	0
HMGCR	0	0	4	0.00973236	3	0.00276753	0	0	0	0	1	0.0016835	2	0.010989	1	0.0017094	2	0.00382409	0	0	0	0	0	0	1	0.00268817	3	0.00530035	3	0.00616016	0	0	20	0.034188	0	0	15	0.0303644	0	0	0	0	2	0.00454545	0	0	0	0	0
HMOX1	0	0	3	0.00729927	0	0	0	0	0	0	0	0	0	0	0	0	1	0.00191205	0	0	0	0	3	0.00583658	0	0	2	0.00353357	0	0	0	0	0	0	0	0	0	0	0	0	1	0.00226244	0	0	0	0	0	0	1
HNF4A	0	0	0	0	0	0	0	0	0	0	0	0	0	0	0	0	0	0	0	0	0	0	0	0	0	0	0	0	0	0	0	0	0	0	0	0	0	0	0	0	0	0	0	0	0	0	0	0	0
HPS1	0	0	4	0.00973236	2	0.00184502	1	0.003367	0	0	4	0.00673401	0	0	0	0	2	0.00382409	0	0	0	0	0	0	0	0	1	0.00176678	3	0.00616016	1	0.0114943	3	0.00512821	0	0	7	0.01417	1	0.00392157	1	0.00226244	3	0.00681818	0	0	0	0	0
HPS4	2	0.0229885	2	0.00486618	0	0	0	0	0	0	1	0.0016835	1	0.00549451	0	0	1	0.00191205	0	0	0	0	0	0	1	0.00268817	0	0	0	0	0	0	0	0	0	0	4	0.00809717	1	0.00392157	1	0.00226244	0	0	0	0	0	0	2
HPS5	0	0	0	0	0	0	0	0	0	0	0	0	0	0	0	0	1	0.00191205	0	0	0	0	2	0.00389105	0	0	2	0.00353357	0	0	0	0	0	0	0	0	0	0	0	0	0	0	0	0	0	0	1	0.00200401	0
HPS6	0	0	3	0.00729927	1	0.000922509	1	0.003367	0	0	4	0.00673401	0	0	0	0	1	0.00191205	0	0	0	0	1	0.00194553	0	0	1	0.00176678	2	0.00410678	0	0	2	0.0034188	1	0.00543478	6	0.0121457	0	0	1	0.00226244	2	0.00454545	0	0	0	0	0
HPSE	0	0	2	0.00486618	1	0.000922509	1	0.003367	0	0	1	0.0016835	0	0	0	0	3	0.00573614	0	0	0	0	0	0	1	0.00268817	1	0.00176678	2	0.00410678	0	0	4	0.00683761	0	0	0	0	1	0.00392157	0	0	2	0.00454545	0	0	0	0	0
HRAS	1	0.0114943	3	0.00729927	2	0.00184502	1	0.003367	0	0	3	0.00505051	2	0.010989	3	0.00512821	1	0.00191205	0	0	0	0	12	0.0233463	0	0	3	0.00530035	2	0.00410678	0	0	9	0.0153846	0	0	0	0	3	0.0117647	0	0	2	0.00454545	3	0.0201342	1	0.00200401	0
HRG	0	0	0	0	1	0.000922509	0	0	0	0	0	0	0	0	1	0.0017094	0	0	0	0	0	0	2	0.00389105	0	0	2	0.00353357	0	0	0	0	0	0	0	0	6	0.0121457	0	0	1	0.00226244	1	0.00227273	0	0	0	0	0
IGF1	0	0	0	0	1	0.000922509	0	0	0	0	0	0	0	0	0	0	1	0.00191205	0	0	0	0	0	0	0	0	2	0.00353357	0	0	0	0	0	0	0	0	0	0	1	0.00392157	1	0.00226244	1	0.00227273	0	0	0	0	0
IL1A	0	0	1	0.00243309	0	0	0	0	0	0	0	0	0	0	0	0	0	0	0	0	0	0	0	0	0	0	0	0	0	0	0	0	0	0	0	0	5	0.0101215	1	0.00392157	0	0	0	0	0	0	0	0	0
INSL3	0	0	0	0	0	0	2	0.00673401	0	0	3	0.00505051	0	0	1	0.0017094	0	0	0	0	0	0	0	0	1	0.00268817	1	0.00176678	0	0	0	0	1	0.0017094	0	0	1	0.00202429	0	0	0	0	0	0	0	0	1	0.00200401	0
ITGA2B	1	0.0114943	0	0	1	0.000922509	0	0	0	0	0	0	1	0.00549451	1	0.0017094	0	0	0	0	0	0	0	0	1	0.00268817	0	0	1	0.00205339	0	0	4	0.00683761	0	0	11	0.0222672	1	0.00392157	0	0	1	0.00227273	0	0	0	0	0
ITGB1	0	0	3	0.00729927	0	0	0	0	0	0	0	0	0	0	0	0	0	0	0	0	0	0	0	0	0	0	0	0	0	0	0	0	0	0	0	0	1	0.00202429	0	0	1	0.00226244	1	0.00227273	1	0.00671141	0	0	1
ITGB3	0	0	1	0.00243309	0	0	0	0	0	0	0	0	0	0	1	0.0017094	1	0.00191205	0	0	0	0	0	0	0	0	0	0	0	0	0	0	2	0.0034188	0	0	1	0.00202429	0	0	0	0	0	0	0	0	0	0	0
JAML	0	0	1	0.00243309	5	0.00461255	6	0.020202	0	0	0	0	1	0.00549451	0	0	4	0.00764818	0	0	1	0.00195312	0	0	0	0	1	0.00176678	2	0.00410678	0	0	1	0.0017094	0	0	3	0.00607287	4	0.0156863	11	0.0248869	2	0.00454545	4	0.0268456	0	0	0
KANK1	0	0	5	0.0121655	2	0.00184502	2	0.00673401	0	0	3	0.00505051	7	0.0384615	4	0.00683761	9	0.0172084	0	0	1	0.00195312	2	0.00389105	3	0.00806452	9	0.0159011	13	0.026694	1	0.0114943	8	0.0136752	1	0.00543478	5	0.0101215	11	0.0431373	2	0.00452489	12	0.0272727	4	0.0268456	0	0	0
KDR	0	0	0	0	0	0	0	0	0	0	0	0	0	0	0	0	0	0	0	0	0	0	0	0	0	0	0	0	1	0.00205339	0	0	0	0	0	0	2	0.00404858	0	0	0	0	2	0.00454545	0	0	0	0	0
KLKB1	2	0.0229885	11	0.026764	4	0.00369004	8	0.026936	0	0	12	0.020202	7	0.0384615	0	0	16	0.0305927	0	0	0	0	9	0.0175097	12	0.0322581	7	0.0123675	24	0.0492813	0	0	11	0.0188034	2	0.0108696	0	0	7	0.027451	4	0.00904977	15	0.0340909	0	0	0	0	1
KNG1	0	0	0	0	1	0.000922509	0	0	0	0	0	0	0	0	1	0.0017094	0	0	0	0	0	0	2	0.00389105	0	0	2	0.00353357	0	0	0	0	0	0	0	0	6	0.0121457	0	0	1	0.00226244	1	0.00227273	0	0	0	0	0
KRT6A	0	0	1	0.00243309	2	0.00184502	0	0	0	0	1	0.0016835	0	0	0	0	1	0.00191205	0	0	0	0	3	0.00583658	0	0	0	0	0	0	0	0	0	0	1	0.00543478	0	0	1	0.00392157	0	0	2	0.00454545	0	0	0	0	0
LNPK	0	0	0	0	1	0.000922509	0	0	0	0	0	0	0	0	1	0.0017094	0	0	0	0	0	0	1	0.00194553	1	0.00268817	0	0	0	0	0	0	0	0	0	0	6	0.0121457	2	0.00784314	0	0	2	0.00454545	0	0	0	0	1
LOX	0	0	4	0.00973236	1	0.000922509	0	0	0	0	4	0.00673401	0	0	0	0	1	0.00191205	0	0	0	0	0	0	1	0.00268817	4	0.00706714	3	0.00616016	1	0.0114943	6	0.0102564	0	0	3	0.00607287	2	0.00784314	1	0.00226244	5	0.0113636	0	0	0	0	0
LYN	0	0	1	0.00243309	0	0	0	0	0	0	0	0	1	0.00549451	0	0	0	0	0	0	1	0.00195312	0	0	0	0	2	0.00353357	1	0.00205339	1	0.0114943	0	0	1	0.00543478	3	0.00607287	1	0.00392157	0	0	1	0.00227273	1	0.00671141	0	0	0
LYST	0	0	0	0	0	0	2	0.00673401	0	0	0	0	0	0	0	0	0	0	0	0	0	0	2	0.00389105	0	0	1	0.00176678	0	0	0	0	1	0.0017094	1	0.00543478	6	0.0121457	4	0.0156863	0	0	0	0	0	0	0	0	1
MACF1	0	0	0	0	0	0	0	0	1	0.0277778	0	0	0	0	0	0	0	0	0	0	0	0	0	0	1	0.00268817	0	0	0	0	0	0	1	0.0017094	0	0	1	0.00202429	2	0.00784314	0	0	3	0.00681818	0	0	0	0	0
MAP3K1	0	0	6	0.0145985	0	0	0	0	0	0	4	0.00673401	3	0.0164835	0	0	0	0	0	0	0	0	0	0	0	0	0	0	0	0	0	0	0	0	0	0	0	0	0	0	0	0	0	0	0	0	0	0	0
MERTK	0	0	1	0.00243309	0	0	0	0	1	0.0277778	0	0	0	0	1	0.0017094	0	0	0	0	0	0	0	0	1	0.00268817	0	0	0	0	0	0	0	0	0	0	6	0.0121457	0	0	0	0	0	0	0	0	0	0	0
MIA3	0	0	1	0.00243309	0	0	2	0.00673401	0	0	0	0	0	0	1	0.0017094	0	0	0	0	0	0	1	0.00194553	0	0	0	0	0	0	0	0	0	0	1	0.00543478	5	0.0101215	3	0.0117647	1	0.00226244	0	0	1	0.00671141	0	0	0
MMP12	0	0	1	0.00243309	5	0.00461255	2	0.00673401	0	0	1	0.0016835	0	0	0	0	5	0.00956023	0	0	0	0	1	0.00194553	0	0	0	0	2	0.00410678	0	0	1	0.0017094	0	0	2	0.00404858	1	0.00392157	4	0.00904977	3	0.00681818	2	0.0134228	0	0	1
MMRN1	0	0	1	0.00243309	0	0	1	0.003367	0	0	2	0.003367	1	0.00549451	0	0	1	0.00191205	0	0	0	0	1	0.00194553	1	0.00268817	0	0	2	0.00410678	0	0	4	0.00683761	0	0	3	0.00607287	1	0.00392157	1	0.00226244	2	0.00454545	0	0	0	0	0
MPIG6B	0	0	2	0.00486618	1	0.000922509	0	0	0	0	1	0.0016835	0	0	0	0	0	0	0	0	0	0	0	0	0	0	1	0.00176678	1	0.00205339	0	0	0	0	0	0	1	0.00202429	0	0	0	0	4	0.00909091	0	0	0	0	0
MRTFA	1	0.0114943	4	0.00973236	1	0.000922509	1	0.003367	0	0	0	0	1	0.00549451	1	0.0017094	1	0.00191205	0	0	0	0	2	0.00389105	0	0	2	0.00353357	0	0	0	0	3	0.00512821	0	0	0	0	0	0	0	0	2	0.00454545	1	0.00671141	0	0	0
MSX2	0	0	4	0.00973236	0	0	0	0	0	0	0	0	0	0	0	0	1	0.00191205	0	0	0	0	2	0.00389105	0	0	6	0.0106007	4	0.00821355	0	0	3	0.00512821	1	0.00543478	1	0.00202429	1	0.00392157	1	0.00226244	1	0.00227273	1	0.00671141	0	0	0
MTOR	4	0.045977	0	0	3	0.00276753	2	0.00673401	1	0.0277778	3	0.00505051	1	0.00549451	0	0	1	0.00191205	0	0	1	0.00195312	1	0.00194553	3	0.00806452	3	0.00530035	3	0.00616016	1	0.0114943	2	0.0034188	2	0.0108696	3	0.00607287	0	0	2	0.00452489	1	0.00227273	1	0.00671141	0	0	0
MUC16	0	0	1	0.00243309	1	0.000922509	3	0.010101	0	0	3	0.00505051	3	0.0164835	0	0	2	0.00382409	0	0	1	0.00195312	0	0	1	0.00268817	3	0.00530035	1	0.00205339	0	0	2	0.0034188	0	0	0	0	0	0	1	0.00226244	3	0.00681818	0	0	0	0	0
MUSTN1	0	0	4	0.00973236	2	0.00184502	2	0.00673401	0	0	1	0.0016835	4	0.021978	0	0	1	0.00191205	0	0	13	0.0253906	7	0.0136187	1	0.00268817	0	0	2	0.00410678	1	0.0114943	0	0	0	0	2	0.00404858	4	0.0156863	1	0.00226244	7	0.0159091	0	0	0	0	0
MYH10	1	0.0114943	4	0.00973236	4	0.00369004	2	0.00673401	0	0	6	0.010101	1	0.00549451	0	0	0	0	0	0	0	0	0	0	7	0.0188172	6	0.0106007	2	0.00410678	0	0	5	0.00854701	0	0	5	0.0101215	1	0.00392157	2	0.00452489	4	0.00909091	0	0	1	0.00200401	1
MYH2	1	0.0114943	6	0.0145985	0	0	1	0.003367	0	0	0	0	0	0	1	0.0017094	1	0.00191205	0	0	0	0	2	0.00389105	0	0	3	0.00530035	1	0.00205339	0	0	3	0.00512821	0	0	0	0	0	0	2	0.00452489	6	0.0136364	0	0	0	0	1
MYH9	0	0	3	0.00729927	3	0.00276753	2	0.00673401	0	0	7	0.0117845	2	0.010989	0	0	1	0.00191205	0	0	0	0	1	0.00194553	8	0.0215054	6	0.0106007	2	0.00410678	0	0	2	0.0034188	0	0	7	0.01417	0	0	3	0.00678733	4	0.00909091	0	0	2	0.00400802	1
MYLK	0	0	1	0.00243309	0	0	0	0	0	0	0	0	1	0.00549451	0	0	0	0	0	0	1	0.00195312	2	0.00389105	0	0	0	0	1	0.00205339	1	0.0114943	1	0.0017094	0	0	1	0.00202429	1	0.00392157	0	0	0	0	0	0	0	0	0
MYOF	0	0	2	0.00486618	2	0.00184502	1	0.003367	0	0	4	0.00673401	2	0.010989	0	0	2	0.00382409	0	0	0	0	0	0	1	0.00268817	1	0.00176678	3	0.00616016	0	0	2	0.0034188	0	0	11	0.0222672	2	0.00784314	0	0	2	0.00454545	0	0	1	0.00200401	0
MYOZ1	0	0	1	0.00243309	0	0	0	0	0	0	1	0.0016835	1	0.00549451	0	0	0	0	0	0	0	0	0	0	0	0	1	0.00176678	0	0	0	0	0	0	0	0	4	0.00809717	2	0.00784314	0	0	0	0	0	0	3	0.00601202	0
NACA	0	0	0	0	0	0	0	0	0	0	0	0	0	0	1	0.0017094	0	0	0	0	0	0	2	0.00389105	0	0	0	0	0	0	0	0	0	0	0	0	0	0	1	0.00392157	0	0	0	0	0	0	0	0	0
NBEAL2	0	0	1	0.00243309	1	0.000922509	1	0.003367	0	0	1	0.0016835	1	0.00549451	0	0	2	0.00382409	0	0	13	0.0253906	7	0.0136187	1	0.00268817	1	0.00176678	0	0	3	0.0344828	1	0.0017094	1	0.00543478	5	0.0101215	2	0.00784314	0	0	4	0.00909091	0	0	0	0	1
NDNF	0	0	0	0	0	0	0	0	0	0	3	0.00505051	0	0	0	0	1	0.00191205	0	0	0	0	2	0.00389105	0	0	0	0	2	0.00410678	0	0	5	0.00854701	0	0	14	0.0283401	1	0.00392157	0	0	2	0.00454545	0	0	0	0	0
NF1	2	0.0229885	2	0.00486618	0	0	0	0	0	0	2	0.003367	1	0.00549451	0	0	0	0	0	0	0	0	0	0	0	0	0	0	0	0	0	0	0	0	0	0	0	0	10	0.0392157	0	0	0	0	0	0	0	0	0
NFE2L2	0	0	0	0	1	0.000922509	0	0	0	0	1	0.0016835	1	0.00549451	1	0.0017094	0	0	0	0	0	0	1	0.00194553	1	0.00268817	0	0	0	0	0	0	0	0	0	0	6	0.0121457	2	0.00784314	0	0	3	0.00681818	0	0	0	0	0
NLRP6	1	0.0114943	3	0.00729927	3	0.00276753	1	0.003367	0	0	3	0.00505051	2	0.010989	3	0.00512821	2	0.00382409	0	0	0	0	12	0.0233463	0	0	3	0.00530035	2	0.00410678	0	0	9	0.0153846	0	0	1	0.00202429	5	0.0196078	0	0	2	0.00454545	3	0.0201342	1	0.00200401	0
NOG	0	0	1	0.00243309	0	0	1	0.003367	0	0	0	0	0	0	0	0	0	0	0	0	0	0	0	0	0	0	0	0	1	0.00205339	0	0	0	0	0	0	1	0.00202429	0	0	0	0	0	0	0	0	0	0	0
NOTCH2	0	0	0	0	0	0	1	0.003367	0	0	2	0.003367	1	0.00549451	0	0	13	0.0248566	0	0	0	0	1	0.00194553	0	0	7	0.0123675	4	0.00821355	0	0	3	0.00512821	0	0	1	0.00202429	3	0.0117647	0	0	1	0.00227273	0	0	0	0	0
NR4A3	0	0	4	0.00973236	3	0.00276753	3	0.010101	0	0	7	0.0117845	2	0.010989	0	0	1	0.00191205	0	0	0	0	0	0	8	0.0215054	7	0.0123675	2	0.00410678	0	0	2	0.0034188	0	0	5	0.0101215	0	0	1	0.00226244	3	0.00681818	0	0	2	0.00400802	1
P2RX1	2	0.0229885	0	0	0	0	0	0	0	0	0	0	0	0	0	0	0	0	0	0	0	0	0	0	0	0	0	0	1	0.00205339	2	0.0229885	0	0	0	0	4	0.00809717	1	0.00392157	2	0.00452489	0	0	0	0	0	0	0
P2RY1	0	0	0	0	0	0	0	0	0	0	0	0	0	0	0	0	0	0	0	0	0	0	1	0.00194553	0	0	1	0.00176678	1	0.00205339	1	0.0114943	0	0	0	0	1	0.00202429	0	0	2	0.00452489	0	0	0	0	0	0	0
P2RY12	0	0	0	0	0	0	1	0.003367	0	0	0	0	0	0	0	0	4	0.00764818	0	0	1	0.00195312	0	0	0	0	1	0.00176678	1	0.00205339	0	0	0	0	0	0	0	0	1	0.00392157	0	0	0	0	1	0.00671141	0	0	0
PAK1	0	0	6	0.0145985	11	0.0101476	8	0.026936	0	0	10	0.016835	3	0.0164835	21	0.0358974	7	0.0133843	0	0	1	0.00195312	4	0.0077821	4	0.0107527	1	0.00176678	20	0.0410678	0	0	8	0.0136752	0	0	37	0.0748988	10	0.0392157	11	0.0248869	12	0.0272727	0	0	4	0.00801603	0
PAPSS2	0	0	7	0.0170316	1	0.000922509	2	0.00673401	0	0	0	0	14	0.0769231	2	0.0034188	18	0.0344168	0	0	1	0.00195312	0	0	3	0.00806452	0	0	6	0.0123203	0	0	1	0.0017094	0	0	2	0.00404858	1	0.00392157	1	0.00226244	1	0.00227273	1	0.00671141	0	0	1
PARD3	1	0.0114943	0	0	0	0	0	0	0	0	1	0.0016835	0	0	0	0	0	0	0	0	0	0	1	0.00194553	0	0	0	0	0	0	0	0	0	0	0	0	0	0	2	0.00784314	2	0.00452489	0	0	0	0	0	0	0
PDCD10	0	0	3	0.00729927	2	0.00184502	0	0	0	0	0	0	0	0	1	0.0017094	0	0	0	0	0	0	1	0.00194553	0	0	2	0.00353357	0	0	0	0	8	0.0136752	0	0	1	0.00202429	1	0.00392157	0	0	2	0.00454545	0	0	1	0.00200401	0
PDGFA	0	0	4	0.00973236	1	0.000922509	0	0	0	0	0	0	1	0.00549451	0	0	0	0	0	0	0	0	2	0.00389105	1	0.00268817	2	0.00353357	0	0	0	0	1	0.0017094	0	0	0	0	0	0	0	0	1	0.00227273	1	0.00671141	0	0	2
PDGFB	0	0	0	0	0	0	0	0	0	0	0	0	1	0.00549451	0	0	0	0	0	0	1	0.00195312	0	0	0	0	0	0	1	0.00205339	0	0	0	0	0	0	1	0.00202429	0	0	1	0.00226244	2	0.00454545	0	0	0	0	1
PDGFRA	0	0	0	0	3	0.00276753	1	0.003367	2	0.0555556	3	0.00505051	0	0	1	0.0017094	2	0.00382409	0	0	1	0.00195312	0	0	2	0.00537634	2	0.00353357	3	0.00616016	1	0.0114943	1	0.0017094	2	0.0108696	1	0.00202429	0	0	2	0.00452489	2	0.00454545	1	0.00671141	0	0	0
PDPN	1	0.0114943	1	0.00243309	0	0	0	0	0	0	0	0	0	0	0	0	0	0	0	0	0	0	0	0	0	0	0	0	0	0	0	0	0	0	0	0	6	0.0121457	0	0	0	0	0	0	0	0	0	0	0
PEAR1	0	0	0	0	0	0	0	0	0	0	0	0	0	0	0	0	0	0	0	0	0	0	0	0	0	0	0	0	0	0	0	0	0	0	0	0	0	0	1	0.00392157	0	0	0	0	0	0	0	0	0
PECAM1	0	0	0	0	0	0	1	0.003367	0	0	1	0.0016835	0	0	0	0	0	0	0	0	0	0	1	0.00194553	1	0.00268817	0	0	0	0	0	0	1	0.0017094	0	0	1	0.00202429	1	0.00392157	1	0.00226244	0	0	0	0	0	0	0
PF4	0	0	0	0	0	0	0	0	0	0	1	0.0016835	1	0.00549451	0	0	0	0	0	0	0	0	2	0.00389105	0	0	0	0	3	0.00616016	0	0	0	0	0	0	2	0.00404858	2	0.00784314	0	0	1	0.00227273	0	0	0	0	0
PHLDB2	0	0	1	0.00243309	0	0	0	0	0	0	0	0	0	0	0	0	0	0	0	0	1	0.00195312	0	0	0	0	0	0	0	0	1	0.0114943	0	0	0	0	3	0.00607287	0	0	0	0	0	0	0	0	0	0	0
PIK3CB	0	0	1	0.00243309	1	0.000922509	7	0.023569	0	0	3	0.00505051	2	0.010989	1	0.0017094	1	0.00191205	0	0	2	0.00390625	0	0	2	0.00537634	2	0.00353357	1	0.00205339	0	0	12	0.0205128	0	0	3	0.00607287	1	0.00392157	1	0.00226244	4	0.00909091	0	0	0	0	0
PIP5K1C	0	0	2	0.00486618	0	0	0	0	0	0	0	0	1	0.00549451	0	0	0	0	0	0	0	0	0	0	0	0	0	0	0	0	0	0	0	0	0	0	0	0	1	0.00392157	0	0	0	0	0	0	0	0	0
PLA2G4A	0	0	1	0.00243309	0	0	1	0.003367	0	0	1	0.0016835	2	0.010989	0	0	0	0	0	0	0	0	0	0	0	0	1	0.00176678	0	0	0	0	0	0	0	0	5	0.0101215	2	0.00784314	1	0.00226244	3	0.00681818	0	0	3	0.00601202	0
PLAU	0	0	0	0	0	0	0	0	0	0	0	0	1	0.00549451	0	0	0	0	0	0	0	0	7	0.0136187	0	0	2	0.00353357	0	0	0	0	1	0.0017094	1	0.00543478	0	0	0	0	1	0.00226244	1	0.00227273	1	0.00671141	2	0.00400802	0
PLEC	0	0	0	0	0	0	0	0	0	0	0	0	0	0	0	0	0	0	0	0	1	0.00195312	0	0	1	0.00268817	0	0	0	0	0	0	0	0	0	0	2	0.00404858	0	0	0	0	0	0	0	0	0	0	0
PLEK	0	0	2	0.00486618	4	0.00369004	9	0.030303	0	0	1	0.0016835	2	0.010989	0	0	5	0.00956023	0	0	1	0.00195312	0	0	0	0	3	0.00530035	4	0.00821355	1	0.0114943	3	0.00512821	0	0	6	0.0121457	7	0.027451	12	0.0271493	3	0.00681818	5	0.033557	0	0	0
PLET1	0	0	2	0.00486618	2	0.00184502	3	0.010101	0	0	1	0.0016835	0	0	6	0.0102564	3	0.00573614	0	0	1	0.00195312	2	0.00389105	6	0.016129	3	0.00530035	0	0	0	0	10	0.017094	1	0.00543478	1	0.00202429	0	0	6	0.0135747	2	0.00454545	0	0	0	0	0
PLG	0	0	0	0	0	0	0	0	0	0	0	0	0	0	1	0.0017094	0	0	0	0	0	0	0	0	0	0	1	0.00176678	0	0	0	0	3	0.00512821	0	0	4	0.00809717	0	0	0	0	1	0.00227273	0	0	0	0	0
PLPP3	0	0	1	0.00243309	5	0.00461255	8	0.026936	0	0	0	0	1	0.00549451	0	0	4	0.00764818	0	0	1	0.00195312	0	0	0	0	3	0.00530035	1	0.00205339	0	0	1	0.0017094	0	0	3	0.00607287	4	0.0156863	13	0.0294118	1	0.00227273	7	0.0469799	0	0	0
POU2F3	0	0	6	0.0145985	3	0.00276753	4	0.013468	0	0	2	0.003367	1	0.00549451	2	0.0034188	1	0.00191205	0	0	0	0	4	0.0077821	1	0.00268817	3	0.00530035	3	0.00616016	0	0	27	0.0461538	3	0.0163043	2	0.00404858	1	0.00392157	2	0.00452489	7	0.0159091	1	0.00671141	0	0	1
PPARA	0	0	1	0.00243309	1	0.000922509	0	0	0	0	0	0	0	0	0	0	0	0	0	0	0	0	0	0	1	0.00268817	0	0	0	0	0	0	0	0	0	0	3	0.00607287	0	0	0	0	1	0.00227273	0	0	0	0	0
PPARD	0	0	0	0	0	0	0	0	0	0	0	0	1	0.00549451	0	0	0	0	0	0	0	0	0	0	0	0	2	0.00353357	1	0.00205339	0	0	0	0	0	0	0	0	1	0.00392157	0	0	0	0	0	0	0	0	0
PPIA	0	0	8	0.0194647	1	0.000922509	0	0	0	0	1	0.0016835	0	0	0	0	0	0	0	0	0	0	0	0	2	0.00537634	1	0.00176678	1	0.00205339	0	0	2	0.0034188	0	0	0	0	0	0	0	0	1	0.00227273	0	0	0	0	0
PPL	0	0	0	0	1	0.000922509	1	0.003367	0	0	0	0	0	0	0	0	3	0.00573614	0	0	2	0.00390625	1	0.00194553	0	0	1	0.00176678	1	0.00205339	0	0	2	0.0034188	0	0	1	0.00202429	0	0	3	0.00678733	1	0.00227273	2	0.0134228	0	0	0
PRCP	0	0	0	0	0	0	2	0.00673401	0	0	3	0.00505051	1	0.00549451	0	0	1	0.00191205	0	0	0	0	1	0.00194553	1	0.00268817	1	0.00176678	0	0	0	0	1	0.0017094	0	0	1	0.00202429	0	0	0	0	2	0.00454545	0	0	0	0	0
PRDX2	0	0	1	0.00243309	0	0	0	0	0	0	1	0.0016835	2	0.010989	0	0	0	0	0	0	1	0.00195312	1	0.00194553	0	0	0	0	1	0.00205339	0	0	1	0.0017094	0	0	0	0	0	0	0	0	1	0.00227273	0	0	0	0	0
PRKCA	1	0.0114943	3	0.00729927	2	0.00184502	2	0.00673401	0	0	1	0.0016835	4	0.021978	0	0	1	0.00191205	0	0	13	0.0253906	6	0.0116732	1	0.00268817	0	0	2	0.00410678	1	0.0114943	0	0	0	0	2	0.00404858	4	0.0156863	0	0	5	0.0113636	0	0	0	0	0
PRKCD	0	0	1	0.00243309	0	0	0	0	0	0	2	0.003367	1	0.00549451	0	0	3	0.00573614	0	0	3	0.00585938	0	0	1	0.00268817	0	0	1	0.00205339	0	0	0	0	1	0.00543478	3	0.00607287	0	0	0	0	5	0.0113636	0	0	0	0	0
PRKCE	0	0	1	0.00243309	0	0	0	0	0	0	0	0	2	0.010989	0	0	3	0.00573614	0	0	0	0	0	0	2	0.00537634	1	0.00176678	4	0.00821355	1	0.0114943	0	0	0	0	1	0.00202429	3	0.0117647	0	0	2	0.00454545	2	0.0134228	0	0	0
PRKCQ	1	0.0114943	4	0.00973236	2	0.00184502	1	0.003367	0	0	14	0.023569	6	0.032967	6	0.0102564	1	0.00191205	1	0.0153846	2	0.00390625	0	0	1	0.00268817	1	0.00176678	2	0.00410678	0	0	3	0.00512821	0	0	6	0.0121457	2	0.00784314	7	0.0158371	8	0.0181818	3	0.0201342	5	0.01002	0
PRKG1	1	0.0114943	1	0.00243309	0	0	0	0	0	0	0	0	0	0	0	0	0	0	0	0	0	0	0	0	0	0	0	0	0	0	0	0	2	0.0034188	0	0	16	0.0323887	1	0.00392157	0	0	2	0.00454545	0	0	0	0	1
PROC	0	0	0	0	0	0	0	0	0	0	0	0	0	0	0	0	0	0	0	0	0	0	0	0	0	0	0	0	0	0	0	0	0	0	0	0	2	0.00404858	0	0	0	0	0	0	0	0	0	0	0
PROCR	0	0	2	0.00486618	0	0	0	0	0	0	0	0	5	0.0274725	0	0	4	0.00764818	0	0	1	0.00195312	4	0.0077821	0	0	3	0.00530035	6	0.0123203	0	0	0	0	0	0	1	0.00202429	0	0	0	0	4	0.00909091	0	0	0	0	0
PROS1	0	0	0	0	3	0.00276753	0	0	0	0	1	0.0016835	1	0.00549451	0	0	0	0	0	0	0	0	1	0.00194553	0	0	6	0.0106007	4	0.00821355	0	0	2	0.0034188	0	0	3	0.00607287	3	0.0117647	1	0.00226244	0	0	1	0.00671141	0	0	0
PROZ	1	0.0114943	10	0.0243309	2	0.00184502	7	0.023569	0	0	1	0.0016835	4	0.021978	3	0.00512821	7	0.0133843	0	0	1	0.00195312	13	0.0252918	0	0	0	0	4	0.00821355	0	0	3	0.00512821	0	0	3	0.00607287	13	0.0509804	2	0.00452489	2	0.00454545	0	0	0	0	3
PRSS56	1	0.0114943	14	0.0340633	0	0	0	0	0	0	12	0.020202	7	0.0384615	0	0	0	0	0	0	0	0	0	0	0	0	0	0	0	0	0	0	0	0	0	0	0	0	15	0.0588235	0	0	0	0	0	0	0	0	0
PTEN	0	0	0	0	0	0	0	0	0	0	0	0	0	0	1	0.0017094	4	0.00764818	0	0	0	0	0	0	1	0.00268817	2	0.00353357	0	0	0	0	2	0.0034188	0	0	5	0.0101215	1	0.00392157	0	0	0	0	0	0	0	0	1
PTGER3	0	0	0	0	2	0.00184502	0	0	0	0	0	0	0	0	0	0	0	0	0	0	0	0	0	0	0	0	0	0	0	0	0	0	0	0	0	0	0	0	0	0	0	0	1	0.00227273	0	0	0	0	0
PTGER4	0	0	1	0.00243309	1	0.000922509	0	0	0	0	0	0	0	0	0	0	1	0.00191205	0	0	0	0	2	0.00389105	0	0	0	0	0	0	0	0	2	0.0034188	1	0.00543478	1	0.00202429	0	0	1	0.00226244	0	0	1	0.00671141	2	0.00400802	0
PTK2	0	0	0	0	2	0.00184502	0	0	0	0	0	0	0	0	0	0	0	0	0	0	0	0	0	0	0	0	0	0	0	0	0	0	1	0.0017094	1	0.00543478	0	0	0	0	0	0	0	0	0	0	0	0	0
PTK7	0	0	2	0.00486618	0	0	0	0	0	0	0	0	1	0.00549451	0	0	0	0	0	0	0	0	0	0	1	0.00268817	4	0.00706714	0	0	0	0	1	0.0017094	0	0	3	0.00607287	0	0	0	0	2	0.00454545	0	0	0	0	0
PTPN6	0	0	0	0	1	0.000922509	1	0.003367	0	0	0	0	0	0	1	0.0017094	0	0	0	0	0	0	1	0.00194553	0	0	0	0	1	0.00205339	0	0	1	0.0017094	0	0	2	0.00404858	2	0.00784314	1	0.00226244	2	0.00454545	0	0	0	0	0
PTPRJ	0	0	0	0	0	0	2	0.00673401	0	0	3	0.00505051	0	0	0	0	0	0	0	0	0	0	0	0	1	0.00268817	1	0.00176678	0	0	0	0	1	0.0017094	0	0	1	0.00202429	0	0	0	0	1	0.00227273	0	0	1	0.00200401	0
RAB27A	0	0	1	0.00243309	2	0.00184502	2	0.00673401	0	0	1	0.0016835	0	0	0	0	2	0.00382409	0	0	0	0	0	0	0	0	3	0.00530035	3	0.00616016	1	0.0114943	4	0.00683761	0	0	3	0.00607287	0	0	2	0.00452489	2	0.00454545	0	0	0	0	1
RAB3A	0	0	0	0	0	0	0	0	0	0	0	0	0	0	1	0.0017094	0	0	0	0	0	0	0	0	0	0	0	0	1	0.00205339	2	0.0229885	0	0	0	0	3	0.00607287	1	0.00392157	2	0.00452489	0	0	0	0	0	0	0
RAP2B	0	0	2	0.00486618	2	0.00184502	0	0	0	0	0	0	0	0	0	0	0	0	0	0	1	0.00195312	0	0	0	0	0	0	1	0.00205339	0	0	0	0	0	0	2	0.00404858	0	0	0	0	3	0.00681818	0	0	0	0	0
REG3A	0	0	2	0.00486618	2	0.00184502	0	0	0	0	0	0	0	0	0	0	0	0	0	0	1	0.00195312	0	0	0	0	0	0	1	0.00205339	0	0	0	0	0	0	2	0.00404858	0	0	0	0	3	0.00681818	0	0	0	0	0
REG3G	0	0	1	0.00243309	2	0.00184502	2	0.00673401	0	0	0	0	4	0.021978	0	0	0	0	0	0	0	0	2	0.00389105	1	0.00268817	1	0.00176678	1	0.00205339	0	0	2	0.0034188	0	0	5	0.0101215	0	0	0	0	3	0.00681818	0	0	0	0	5
RREB1	2	0.0229885	0	0	0	0	0	0	0	0	0	0	1	0.00549451	0	0	1	0.00191205	0	0	0	0	0	0	0	0	0	0	0	0	0	0	0	0	0	0	0	0	0	0	0	0	0	0	0	0	0	0	0
S100A9	0	0	0	0	0	0	0	0	0	0	1	0.0016835	0	0	1	0.0017094	1	0.00191205	0	0	0	0	0	0	0	0	0	0	0	0	0	0	1	0.0017094	0	0	0	0	0	0	1	0.00226244	0	0	0	0	0	0	0
SCNN1B	0	0	0	0	0	0	0	0	0	0	1	0.0016835	0	0	1	0.0017094	1	0.00191205	0	0	0	0	0	0	0	0	0	0	0	0	0	0	1	0.0017094	0	0	0	0	0	0	1	0.00226244	0	0	0	0	0	0	0
SCNN1G	0	0	0	0	0	0	0	0	0	0	0	0	1	0.00549451	0	0	0	0	0	0	0	0	7	0.0136187	0	0	2	0.00353357	0	0	0	0	1	0.0017094	1	0.00543478	0	0	0	0	0	0	0	0	1	0.00671141	2	0.00400802	0
SCRIB	0	0	1	0.00243309	0	0	0	0	0	0	0	0	0	0	0	0	0	0	0	0	1	0.00195312	1	0.00194553	0	0	0	0	1	0.00205339	0	0	1	0.0017094	0	0	0	0	0	0	0	0	1	0.00227273	0	0	0	0	0
SDC1	0	0	0	0	0	0	1	0.003367	0	0	0	0	0	0	0	0	0	0	0	0	0	0	0	0	0	0	1	0.00176678	0	0	0	0	0	0	0	0	1	0.00202429	0	0	0	0	0	0	0	0	0	0	0
SDC4	0	0	0	0	1	0.000922509	0	0	0	0	1	0.0016835	0	0	0	0	0	0	0	0	1	0.00195312	0	0	0	0	1	0.00176678	0	0	0	0	0	0	0	0	5	0.0101215	1	0.00392157	0	0	0	0	0	0	0	0	1
SELP	0	0	5	0.0121655	1	0.000922509	2	0.00673401	1	0.0277778	1	0.0016835	1	0.00549451	2	0.0034188	2	0.00382409	1	0.0153846	0	0	0	0	2	0.00537634	2	0.00353357	2	0.00410678	0	0	2	0.0034188	0	0	5	0.0101215	1	0.00392157	2	0.00452489	0	0	1	0.00671141	0	0	0
SERPINA10	0	0	7	0.0170316	2	0.00184502	0	0	0	0	10	0.016835	7	0.0384615	0	0	15	0.0286807	0	0	1	0.00195312	0	0	0	0	5	0.00883392	7	0.0143737	0	0	9	0.0153846	5	0.0271739	6	0.0121457	3	0.0117647	0	0	12	0.0272727	3	0.0201342	0	0	0
SERPINB2	0	0	1	0.00243309	0	0	0	0	0	0	0	0	0	0	0	0	0	0	0	0	0	0	0	0	0	0	0	0	0	0	0	0	0	0	0	0	2	0.00404858	1	0.00392157	0	0	1	0.00227273	0	0	0	0	0
SERPINC1	0	0	2	0.00486618	2	0.00184502	0	0	0	0	1	0.0016835	2	0.010989	2	0.0034188	0	0	0	0	0	0	0	0	1	0.00268817	3	0.00530035	3	0.00616016	0	0	2	0.0034188	0	0	1	0.00202429	1	0.00392157	0	0	2	0.00454545	0	0	0	0	1
SERPIND1	2	0.0229885	1	0.00243309	1	0.000922509	0	0	0	0	0	0	0	0	0	0	0	0	0	0	0	0	0	0	0	0	1	0.00176678	2	0.00410678	0	0	0	0	0	0	1	0.00202429	0	0	0	0	1	0.00227273	0	0	1	0.00200401	0
SERPINE1	0	0	7	0.0170316	1	0.000922509	6	0.020202	0	0	0	0	2	0.010989	1	0.0017094	9	0.0172084	0	0	1	0.00195312	0	0	0	0	1	0.00176678	4	0.00821355	0	0	0	0	1	0.00543478	0	0	4	0.0156863	0	0	0	0	0	0	0	0	2
SERPINE2	0	0	5	0.0121655	1	0.000922509	3	0.010101	0	0	6	0.010101	2	0.010989	0	0	1	0.00191205	0	0	0	0	0	0	8	0.0215054	7	0.0123675	2	0.00410678	0	0	4	0.00683761	1	0.00543478	2	0.00404858	1	0.00392157	2	0.00452489	5	0.0113636	0	0	2	0.00400802	1
SERPINF2	2	0.0229885	0	0	1	0.000922509	0	0	0	0	2	0.003367	1	0.00549451	0	0	0	0	0	0	0	0	0	0	1	0.00268817	0	0	0	0	1	0.0114943	0	0	0	0	3	0.00607287	0	0	0	0	1	0.00227273	0	0	0	0	0
SERPING1	0	0	0	0	0	0	0	0	0	0	0	0	0	0	0	0	0	0	0	0	0	0	0	0	0	0	0	0	0	0	0	0	0	0	0	0	0	0	1	0.00392157	0	0	0	0	0	0	0	0	0
SH2B3	0	0	3	0.00729927	1	0.000922509	2	0.00673401	0	0	0	0	5	0.0274725	1	0.0017094	1	0.00191205	0	0	0	0	0	0	1	0.00268817	0	0	4	0.00821355	0	0	3	0.00512821	0	0	3	0.00607287	5	0.0196078	1	0.00226244	5	0.0113636	0	0	0	0	0
SHH	2	0.0229885	0	0	1	0.000922509	0	0	0	0	0	0	1	0.00549451	1	0.0017094	0	0	0	0	0	0	0	0	1	0.00268817	0	0	1	0.00205339	0	0	4	0.00683761	0	0	11	0.0222672	0	0	0	0	2	0.00454545	0	0	0	0	0
SLC11A1	0	0	1	0.00243309	0	0	1	0.003367	0	0	0	0	0	0	0	0	1	0.00191205	0	0	0	0	6	0.0116732	1	0.00268817	0	0	4	0.00821355	0	0	0	0	0	0	0	0	1	0.00392157	0	0	0	0	0	0	0	0	0
SLC12A2	0	0	5	0.0121655	1	0.000922509	6	0.020202	0	0	0	0	1	0.00549451	1	0.0017094	6	0.0114723	0	0	1	0.00195312	1	0.00194553	0	0	0	0	3	0.00616016	0	0	0	0	0	0	0	0	3	0.0117647	0	0	0	0	0	0	0	0	0
SLC4A1	1	0.0114943	3	0.00729927	0	0	0	0	0	0	3	0.00505051	0	0	1	0.0017094	2	0.00382409	0	0	0	0	0	0	1	0.00268817	4	0.00706714	3	0.00616016	1	0.0114943	5	0.00854701	1	0.00543478	3	0.00607287	2	0.00784314	0	0	5	0.0113636	0	0	0	0	0
SLC7A11	0	0	2	0.00486618	0	0	0	0	0	0	8	0.013468	1	0.00549451	0	0	0	0	0	0	0	0	0	0	0	0	0	0	0	0	0	0	0	0	0	0	0	0	0	0	0	0	0	0	0	0	0	0	0
SMAD3	0	0	4	0.00973236	0	0	0	0	1	0.0277778	24	0.040404	15	0.0824176	0	0	0	0	0	0	0	0	0	0	0	0	0	0	0	0	0	0	0	0	0	0	0	0	2	0.00784314	0	0	0	0	0	0	0	0	0
SMAD4	1	0.0114943	4	0.00973236	4	0.00369004	3	0.010101	1	0.0277778	4	0.00673401	0	0	2	0.0034188	4	0.00764818	0	0	1	0.00195312	3	0.00583658	6	0.016129	4	0.00706714	0	0	0	0	14	0.0239316	1	0.00543478	2	0.00404858	0	0	5	0.0113122	6	0.0136364	0	0	0	0	1
SMOC2	1	0.0114943	1	0.00243309	0	0	0	0	0	0	0	0	1	0.00549451	1	0.0017094	0	0	0	0	2	0.00390625	0	0	0	0	1	0.00176678	0	0	1	0.0114943	0	0	0	0	3	0.00607287	0	0	0	0	1	0.00227273	1	0.00671141	0	0	0
SNAI2	0	0	0	0	2	0.00184502	0	0	0	0	0	0	0	0	0	0	0	0	0	0	0	0	0	0	0	0	0	0	0	0	0	0	1	0.0017094	0	0	0	0	0	0	0	0	1	0.00227273	0	0	0	0	0
SRF	0	0	0	0	0	0	0	0	0	0	0	0	0	0	0	0	1	0.00191205	0	0	0	0	0	0	0	0	1	0.00176678	0	0	0	0	0	0	0	0	1	0.00202429	0	0	0	0	0	0	0	0	0	0	0
SRSF6	0	0	4	0.00973236	7	0.00645756	9	0.030303	0	0	0	0	1	0.00549451	0	0	3	0.00573614	0	0	1	0.00195312	1	0.00194553	1	0.00268817	4	0.00706714	3	0.00616016	0	0	2	0.0034188	1	0.00543478	2	0.00404858	5	0.0196078	11	0.0248869	0	0	13	0.0872483	0	0	0
ST3GAL4	0	0	7	0.0170316	5	0.00461255	3	0.010101	0	0	1	0.0016835	0	0	1	0.0017094	1	0.00191205	0	0	1	0.00195312	6	0.0116732	3	0.00806452	3	0.00530035	1	0.00205339	0	0	1	0.0017094	0	0	15	0.0303644	6	0.0235294	1	0.00226244	3	0.00681818	0	0	0	0	0
STARD13	1	0.0114943	1	0.00243309	0	0	0	0	0	0	1	0.0016835	0	0	0	0	0	0	0	0	0	0	0	0	0	0	1	0.00176678	0	0	0	0	3	0.00512821	1	0.00543478	0	0	0	0	0	0	1	0.00227273	0	0	4	0.00801603	0
STXBP1	0	0	1	0.00243309	2	0.00184502	2	0.00673401	0	0	3	0.00505051	1	0.00549451	0	0	4	0.00764818	0	0	0	0	1	0.00194553	0	0	5	0.00883392	4	0.00821355	0	0	3	0.00512821	0	0	2	0.00404858	4	0.0156863	0	0	1	0.00227273	0	0	0	0	0
STXBP3	0	0	4	0.00973236	0	0	0	0	0	0	0	0	0	0	1	0.0017094	1	0.00191205	0	0	0	0	0	0	0	0	3	0.00530035	1	0.00205339	0	0	0	0	0	0	1	0.00202429	1	0.00392157	1	0.00226244	0	0	0	0	1	0.00200401	0
SYK	0	0	0	0	0	0	0	0	0	0	2	0.003367	0	0	0	0	0	0	0	0	1	0.00195312	0	0	1	0.00268817	0	0	0	0	0	0	0	0	0	0	4	0.00809717	0	0	0	0	0	0	1	0.00671141	0	0	0
SYT11	0	0	1	0.00243309	0	0	0	0	0	0	0	0	0	0	0	0	0	0	0	0	0	0	0	0	0	0	0	0	0	0	0	0	0	0	0	0	2	0.00404858	0	0	0	0	1	0.00227273	0	0	0	0	0
SYT7	0	0	0	0	0	0	0	0	0	0	1	0.0016835	1	0.00549451	0	0	1	0.00191205	0	0	0	0	0	0	1	0.00268817	0	0	3	0.00616016	0	0	2	0.0034188	0	0	1	0.00202429	2	0.00784314	0	0	0	0	0	0	1	0.00200401	0
SYTL4	0	0	1	0.00243309	1	0.000922509	7	0.023569	0	0	3	0.00505051	2	0.010989	1	0.0017094	1	0.00191205	0	0	2	0.00390625	0	0	2	0.00537634	2	0.00353357	1	0.00205339	0	0	12	0.0205128	0	0	3	0.00607287	1	0.00392157	1	0.00226244	4	0.00909091	0	0	0	0	0
TBXA2R	0	0	4	0.00973236	1	0.000922509	0	0	0	0	0	0	0	0	0	0	1	0.00191205	0	0	0	0	0	0	0	0	4	0.00706714	1	0.00205339	0	0	1	0.0017094	1	0.00543478	0	0	1	0.00392157	1	0.00226244	2	0.00454545	0	0	2	0.00400802	0
TFPI	0	0	1	0.00243309	0	0	0	0	0	0	0	0	0	0	2	0.0034188	0	0	0	0	0	0	0	0	0	0	0	0	1	0.00205339	0	0	0	0	0	0	1	0.00202429	3	0.0117647	0	0	5	0.0113636	2	0.0134228	0	0	0
TFPI2	0	0	0	0	1	0.000922509	0	0	0	0	0	0	0	0	0	0	0	0	0	0	0	0	0	0	0	0	0	0	1	0.00205339	0	0	1	0.0017094	0	0	0	0	0	0	0	0	0	0	0	0	1	0.00200401	0
TGFB1	0	0	0	0	2	0.00184502	0	0	0	0	0	0	0	0	0	0	0	0	0	0	0	0	3	0.00583658	0	0	0	0	0	0	0	0	2	0.0034188	0	0	1	0.00202429	0	0	0	0	1	0.00227273	0	0	0	0	0
TGFB2	0	0	2	0.00486618	0	0	2	0.00673401	0	0	1	0.0016835	1	0.00549451	1	0.0017094	0	0	0	0	0	0	0	0	0	0	0	0	0	0	0	0	0	0	1	0.00543478	4	0.00809717	2	0.00784314	1	0.00226244	0	0	1	0.00671141	0	0	1
THBD	0	0	0	0	0	0	0	0	0	0	1	0.0016835	0	0	0	0	0	0	0	0	0	0	3	0.00583658	0	0	2	0.00353357	2	0.00410678	0	0	0	0	0	0	1	0.00202429	1	0.00392157	0	0	1	0.00227273	0	0	0	0	1
THBS1	1	0.0114943	2	0.00486618	3	0.00276753	1	0.003367	0	0	7	0.0117845	0	0	2	0.0034188	0	0	0	0	1	0.00195312	1	0.00194553	2	0.00537634	9	0.0159011	1	0.00205339	4	0.045977	13	0.0222222	0	0	4	0.00809717	1	0.00392157	5	0.0113122	1	0.00227273	0	0	0	0	0
TIMP1	0	0	3	0.00729927	0	0	2	0.00673401	0	0	1	0.0016835	5	0.0274725	1	0.0017094	10	0.0191205	0	0	0	0	4	0.0077821	4	0.0107527	1	0.00176678	6	0.0123203	0	0	1	0.0017094	1	0.00543478	0	0	1	0.00392157	0	0	3	0.00681818	1	0.00671141	0	0	1
TLR4	0	0	2	0.00486618	0	0	0	0	0	0	0	0	0	0	0	0	0	0	0	0	0	0	1	0.00194553	0	0	0	0	0	0	0	0	1	0.0017094	1	0.00543478	0	0	0	0	1	0.00226244	2	0.00454545	0	0	4	0.00801603	0
TMEFF2	0	0	1	0.00243309	0	0	0	0	0	0	1	0.0016835	0	0	1	0.0017094	1	0.00191205	0	0	2	0.00390625	0	0	0	0	0	0	0	0	0	0	0	0	0	0	2	0.00404858	1	0.00392157	0	0	2	0.00454545	1	0.00671141	0	0	0
TNF	0	0	2	0.00486618	1	0.000922509	0	0	0	0	1	0.0016835	0	0	0	0	0	0	0	0	0	0	0	0	0	0	1	0.00176678	1	0.00205339	0	0	0	0	0	0	1	0.00202429	0	0	0	0	4	0.00909091	0	0	0	0	0
TNFRSF12A	0	0	7	0.0170316	0	0	0	0	0	0	1	0.0016835	2	0.010989	0	0	0	0	0	0	0	0	0	0	1	0.00268817	1	0.00176678	2	0.00410678	0	0	2	0.0034188	0	0	0	0	0	0	0	0	3	0.00681818	1	0.00671141	0	0	0
TOR1A	0	0	2	0.00486618	2	0.00184502	0	0	0	0	0	0	0	0	0	0	0	0	0	0	1	0.00195312	0	0	0	0	1	0.00176678	1	0.00205339	0	0	4	0.00683761	1	0.00543478	0	0	0	0	0	0	1	0.00227273	0	0	4	0.00801603	1
TPM1	0	0	1	0.00243309	1	0.000922509	0	0	0	0	0	0	1	0.00549451	1	0.0017094	0	0	0	0	0	0	0	0	0	0	1	0.00176678	1	0.00205339	0	0	2	0.0034188	0	0	0	0	0	0	0	0	1	0.00227273	0	0	0	0	0
TPSAB1	0	0	6	0.0145985	2	0.00184502	0	0	0	0	2	0.003367	4	0.021978	0	0	0	0	0	0	0	0	0	0	3	0.00806452	1	0.00176678	2	0.00410678	0	0	3	0.00512821	0	0	1	0.00202429	0	0	0	0	5	0.0113636	1	0.00671141	0	0	0
TREML1	0	0	0	0	2	0.00184502	0	0	0	0	0	0	0	0	0	0	0	0	0	0	0	0	0	0	0	0	0	0	1	0.00205339	0	0	0	0	0	0	0	0	0	0	0	0	1	0.00227273	0	0	0	0	0
TRIM72	0	0	0	0	0	0	0	0	0	0	0	0	0	0	0	0	0	0	0	0	0	0	0	0	0	0	0	0	0	0	0	0	1	0.0017094	0	0	2	0.00404858	0	0	0	0	0	0	0	0	0	0	0
TSPAN32	0	0	0	0	0	0	0	0	0	0	1	0.0016835	0	0	0	0	0	0	0	0	0	0	1	0.00194553	0	0	0	0	0	0	0	0	1	0.0017094	0	0	0	0	0	0	0	0	2	0.00454545	0	0	0	0	0
TSPAN8	0	0	0	0	1	0.000922509	0	0	0	0	1	0.0016835	3	0.0164835	2	0.0034188	1	0.00191205	0	0	0	0	11	0.0214008	0	0	2	0.00353357	2	0.00410678	0	0	4	0.00683761	0	0	1	0.00202429	0	0	0	0	0	0	1	0.00671141	0	0	0
TXK	0	0	0	0	0	0	0	0	0	0	0	0	0	0	0	0	1	0.00191205	0	0	0	0	1	0.00194553	0	0	0	0	2	0.00410678	0	0	1	0.0017094	0	0	2	0.00404858	0	0	0	0	3	0.00681818	0	0	0	0	0
TYRO3	1	0.0114943	1	0.00243309	2	0.00184502	2	0.00673401	0	0	8	0.013468	1	0.00549451	1	0.0017094	2	0.00382409	0	0	1	0.00195312	0	0	1	0.00268817	8	0.0141343	0	0	4	0.045977	16	0.0273504	0	0	4	0.00809717	0	0	5	0.0113122	4	0.00909091	0	0	0	0	0
UBASH3A	1	0.0114943	2	0.00486618	0	0	3	0.010101	0	0	1	0.0016835	2	0.010989	0	0	2	0.00382409	0	0	1	0.00195312	0	0	1	0.00268817	1	0.00176678	3	0.00616016	1	0.0114943	1	0.0017094	0	0	3	0.00607287	0	0	1	0.00226244	7	0.0159091	0	0	0	0	1
UBASH3B	0	0	2	0.00486618	5	0.00461255	7	0.023569	0	0	1	0.0016835	1	0.00549451	0	0	4	0.00764818	0	0	1	0.00195312	0	0	0	0	3	0.00530035	2	0.00410678	1	0.0114943	2	0.0034188	0	0	2	0.00404858	4	0.0156863	11	0.0248869	0	0	10	0.0671141	0	0	0
VANGL2	0	0	0	0	0	0	0	0	0	0	0	0	0	0	0	0	0	0	0	0	0	0	0	0	0	0	0	0	0	0	0	0	0	0	0	0	2	0.00404858	0	0	1	0.00226244	1	0.00227273	0	0	0	0	0
VEGFA	0	0	0	0	3	0.00276753	0	0	0	0	0	0	0	0	0	0	0	0	0	0	0	0	0	0	0	0	0	0	0	0	0	0	1	0.0017094	0	0	1	0.00202429	0	0	0	0	0	0	0	0	0	0	0
VEGFB	0	0	0	0	1	0.000922509	0	0	0	0	1	0.0016835	1	0.00549451	0	0	2	0.00382409	0	0	0	0	0	0	1	0.00268817	1	0.00176678	1	0.00205339	0	0	0	0	1	0.00543478	1	0.00202429	0	0	0	0	1	0.00227273	0	0	0	0	0
VIL1	0	0	5	0.0121655	1	0.000922509	6	0.020202	0	0	0	0	1	0.00549451	1	0.0017094	6	0.0114723	0	0	1	0.00195312	1	0.00194553	0	0	0	0	3	0.00616016	0	0	0	0	0	0	0	0	3	0.0117647	0	0	0	0	0	0	0	0	1
VKORC1	0	0	0	0	0	0	0	0	0	0	0	0	0	0	0	0	0	0	0	0	0	0	0	0	0	0	0	0	0	0	0	0	1	0.0017094	0	0	2	0.00404858	0	0	0	0	0	0	0	0	0	0	0
VPS33B	0	0	1	0.00243309	0	0	0	0	0	0	1	0.0016835	0	0	0	0	0	0	0	0	0	0	1	0.00194553	0	0	1	0.00176678	0	0	0	0	0	0	0	0	0	0	0	0	0	0	0	0	0	0	0	0	0
VWF	0	0	2	0.00486618	2	0.00184502	0	0	0	0	1	0.0016835	1	0.00549451	0	0	0	0	0	0	0	0	0	0	1	0.00268817	4	0.00706714	0	0	0	0	1	0.0017094	0	0	1	0.00202429	2	0.00784314	0	0	1	0.00227273	0	0	0	0	0
WFDC1	0	0	0	0	10	0.00922509	4	0.013468	0	0	1	0.0016835	0	0	1	0.0017094	0	0	0	0	0	0	0	0	1	0.00268817	7	0.0123675	1	0.00205339	1	0.0114943	10	0.017094	0	0	26	0.0526316	3	0.0117647	2	0.00452489	3	0.00681818	1	0.00671141	3	0.00601202	1
WNT3A	0	0	1	0.00243309	0	0	2	0.00673401	0	0	0	0	0	0	0	0	0	0	0	0	0	0	1	0.00194553	0	0	0	0	0	0	0	0	0	0	1	0.00543478	6	0.0121457	2	0.00784314	0	0	1	0.00227273	1	0.00671141	0	0	1
WNT4	0	0	0	0	2	0.00184502	1	0.003367	1	0.0277778	2	0.003367	0	0	2	0.0034188	0	0	0	0	1	0.00195312	0	0	1	0.00268817	1	0.00176678	1	0.00205339	1	0.0114943	1	0.0017094	2	0.0108696	1	0.00202429	0	0	2	0.00452489	1	0.00227273	1	0.00671141	0	0	0
WNT5A	0	0	4	0.00973236	2	0.00184502	3	0.010101	0	0	1	0.0016835	4	0.021978	0	0	1	0.00191205	0	0	13	0.0253906	5	0.00972763	0	0	0	0	3	0.00616016	1	0.0114943	0	0	0	0	1	0.00202429	4	0.0156863	0	0	4	0.00909091	0	0	0	0	0
WNT7A	0	0	0	0	1	0.000922509	0	0	0	0	0	0	2	0.010989	0	0	0	0	0	0	13	0.0253906	0	0	0	0	0	0	1	0.00205339	0	0	0	0	0	0	1	0.00202429	0	0	1	0.00226244	1	0.00227273	0	0	0	0	1
XBP1	3	0.0344828	2	0.00486618	0	0	0	0	0	0	2	0.003367	0	0	0	0	0	0	0	0	0	0	0	0	2	0.00537634	0	0	0	0	0	0	2	0.0034188	0	0	7	0.01417	2	0.00784314	3	0.00678733	4	0.00909091	0	0	0	0	4
YAP1	0	0	1	0.00243309	4	0.00369004	1	0.003367	0	0	1	0.0016835	0	0	0	0	5	0.00956023	0	0	0	0	1	0.00194553	0	0	0	0	2	0.00410678	0	0	2	0.0034188	0	0	2	0.00404858	1	0.00392157	4	0.00904977	4	0.00909091	2	0.0134228	0	0	0
[truncated: 8 more columns]

## Sheet: ST5
Supplementary Table 5. Mean frequency of driver mutations per TCGA Pan-Cancer type
Genes	ACC		BLCA		BRCA		CESC		CHOL		COAD		ESCA		GBM		HNSC		KICH		KIRC		LGG		LIHC		LUAD		LUSC		MESO		OV		PAAD		PRAD		SARC		SKCM		STAD		TGCT		THCA		THYM
	N = 87	f	N = 411	f	N = 1084	f	N = 297	f	N = 36	f	N = 594	f	N = 182	f	N = 585	f	N = 523	f	N = 65	f	N = 512	f	N = 514	f	N = 372	f	N = 566	f	N = 487	f	N = 87	f	N = 585	f	N = 184	f	N = 494	f	N = 255	f	N = 442	f	N = 440	f	N = 149	f	N = 499	f	N = 123
ABAT	0	0	0	0	0	0	0	0	0	0	0	0	0	0	0	0	0	0	0	0	0	0	0	0	0	0	0	0	0	0	0	0	0	0	0	0	0	0	0	0	0	0	0	0	0	0	0	0	0
ABCC8	0	0	0	0	0	0	0	0	0	0	0	0	0	0	0	0	0	0	0	0	0	0	0	0	0	0	0	0	0	0	0	0	0	0	0	0	0	0	0	0	0	0	0	0	0	0	0	0	0
ACTA2	0	0	0	0	0	0	0	0	0	0	0	0	0	0	0	0	0	0	0	0	0	0	0	0	0	0	0	0	0	0	0	0	0	0	0	0	0	0	0	0	0	0	0	0	0	0	0	0	0
ACTG1	0	0	1	0.00243309	2	0.00184502	1	0.003367	0	0	1	0.0016835	1	0.00549451	0	0	0	0	0	0	0	0	0	0	0	0	0	0	0	0	0	0	0	0	0	0	0	0	0	0	0	0	0	0	0	0	0	0	0
ACVRL1	0	0	0	0	0	0	0	0	0	0	0	0	0	0	0	0	0	0	0	0	0	0	0	0	0	0	0	0	0	0	0	0	0	0	0	0	0	0	0	0	0	0	0	0	0	0	0	0	0
ADAMTS13	0	0	0	0	0	0	0	0	0	0	0	0	0	0	0	0	0	0	0	0	0	0	0	0	0	0	0	0	0	0	0	0	0	0	0	0	0	0	0	0	0	0	0	0	0	0	0	0	0
ADAMTS18	0	0	0	0	0	0	0	0	0	0	0	0	0	0	0	0	0	0	0	0	0	0	0	0	0	0	0	0	0	0	0	0	0	0	0	0	0	0	0	0	0	0	0	0	0	0	0	0	0
ADIPOR2	0	0	0	0	0	0	0	0	0	0	0	0	0	0	0	0	0	0	0	0	0	0	0	0	0	0	0	0	0	0	0	0	0	0	0	0	0	0	0	0	0	0	0	0	0	0	0	0	0
ADRA2A	0	0	0	0	0	0	0	0	0	0	0	0	0	0	0	0	0	0	0	0	0	0	0	0	0	0	0	0	0	0	0	0	0	0	0	0	0	0	0	0	0	0	0	0	0	0	0	0	0
ADRA2C	0	0	0	0	0	0	0	0	0	0	0	0	0	0	0	0	0	0	0	0	0	0	0	0	0	0	0	0	0	0	0	0	0	0	0	0	0	0	0	0	0	0	0	0	0	0	0	0	0
ADRB1	0	0	0	0	0	0	0	0	0	0	0	0	0	0	0	0	0	0	0	0	0	0	0	0	0	0	0	0	0	0	0	0	0	0	0	0	0	0	0	0	0	0	0	0	0	0	0	0	0
ADRB2	0	0	0	0	0	0	0	0	0	0	0	0	0	0	0	0	0	0	0	0	0	0	0	0	0	0	0	0	0	0	0	0	0	0	0	0	0	0	0	0	0	0	0	0	0	0	0	0	0
ADTRP	0	0	0	0	0	0	0	0	0	0	0	0	0	0	0	0	0	0	0	0	0	0	0	0	0	0	0	0	0	0	0	0	0	0	0	0	0	0	0	0	0	0	0	0	0	0	0	0	0
AGER	0	0	0	0	0	0	0	0	0	0	0	0	0	0	0	0	0	0	0	0	0	0	0	0	0	0	0	0	0	0	0	0	0	0	0	0	0	0	0	0	0	0	0	0	0	0	0	0	0
AHNAK2	0	0	0	0	0	0	0	0	0	0	0	0	0	0	0	0	0	0	0	0	0	0	0	0	0	0	0	0	0	0	0	0	0	0	0	0	0	0	0	0	0	0	0	0	0	0	0	0	0
AJAP1	0	0	0	0	0	0	0	0	0	0	0	0	0	0	0	0	0	0	0	0	0	0	0	0	0	0	0	0	0	0	0	0	0	0	0	0	0	0	0	0	0	0	0	0	0	0	0	0	0
AJUBA	0	0	1	0.00243309	0	0	4	0.013468	0	0	1	0.0016835	2	0.010989	0	0	24	0.0458891	0	0	1	0.00195312	0	0	1	0.00268817	1	0.00176678	2	0.00410678	0	0	0	0	0	0	0	0	0	0	0	0	0	0	0	0	0	0	0
ALOX12	0	0	0	0	0	0	0	0	0	0	0	0	0	0	0	0	0	0	0	0	0	0	0	0	0	0	0	0	0	0	0	0	0	0	0	0	0	0	0	0	0	0	0	0	0	0	0	0	0
ALOX15	0	0	0	0	0	0	0	0	0	0	0	0	0	0	0	0	0	0	0	0	0	0	0	0	0	0	0	0	0	0	0	0	0	0	0	0	0	0	0	0	0	0	0	0	0	0	0	0	0
ALOX5	0	0	0	0	0	0	0	0	0	0	0	0	0	0	0	0	0	0	0	0	0	0	0	0	0	0	0	0	0	0	0	0	0	0	0	0	0	0	0	0	0	0	0	0	0	0	0	0	0
ANO6	0	0	0	0	0	0	0	0	0	0	0	0	0	0	0	0	0	0	0	0	0	0	0	0	0	0	0	0	0	0	0	0	0	0	0	0	0	0	0	0	0	0	0	0	0	0	0	0	0
ANXA1	0	0	0	0	0	0	0	0	0	0	0	0	0	0	0	0	0	0	0	0	0	0	0	0	0	0	0	0	0	0	0	0	0	0	0	0	0	0	0	0	0	0	0	0	0	0	0	0	0
ANXA2	0	0	0	0	0	0	0	0	0	0	0	0	0	0	0	0	0	0	0	0	0	0	0	0	0	0	0	0	0	0	0	0	0	0	0	0	0	0	0	0	0	0	0	0	0	0	0	0	0
ANXA5	0	0	0	0	0	0	0	0	0	0	0	0	0	0	0	0	0	0	0	0	0	0	0	0	0	0	0	0	0	0	0	0	0	0	0	0	0	0	0	0	0	0	0	0	0	0	0	0	0
ANXA6	0	0	0	0	0	0	0	0	0	0	0	0	0	0	0	0	0	0	0	0	0	0	0	0	0	0	0	0	0	0	0	0	0	0	0	0	0	0	0	0	0	0	0	0	0	0	0	0	0
ANXA8	0	0	0	0	0	0	0	0	0	0	0	0	0	0	0	0	0	0	0	0	0	0	0	0	0	0	0	0	0	0	0	0	0	0	0	0	0	0	0	0	0	0	0	0	0	0	0	0	0
AP3B1	0	0	0	0	0	0	0	0	0	0	0	0	0	0	0	0	0	0	0	0	0	0	0	0	0	0	0	0	0	0	0	0	0	0	0	0	0	0	0	0	0	0	0	0	0	0	0	0	0
APOE	0	0	0	0	0	0	0	0	0	0	0	0	0	0	0	0	0	0	0	0	0	0	0	0	0	0	0	0	0	0	0	0	0	0	0	0	0	0	0	0	0	0	0	0	0	0	0	0	0
APOH	0	0	0	0	0	0	0	0	0	0	0	0	0	0	0	0	0	0	0	0	0	0	0	0	0	0	0	0	0	0	0	0	0	0	0	0	0	0	0	0	0	0	0	0	0	0	0	0	0
AQP1	0	0	0	0	0	0	0	0	0	0	0	0	0	0	0	0	0	0	0	0	0	0	0	0	0	0	0	0	0	0	0	0	0	0	0	0	0	0	0	0	0	0	0	0	0	0	0	0	0
ARFGEF1	0	0	0	0	0	0	0	0	0	0	0	0	0	0	0	0	0	0	0	0	0	0	0	0	0	0	0	0	0	0	0	0	0	0	0	0	0	0	0	0	0	0	0	0	0	0	0	0	0
ARHGAP24	0	0	0	0	0	0	0	0	0	0	0	0	0	0	0	0	0	0	0	0	0	0	0	0	0	0	0	0	0	0	0	0	0	0	0	0	0	0	0	0	0	0	0	0	0	0	0	0	0
ARHGAP35	0	0	0	0	2	0.00184502	0	0	0	0	2	0.003367	1	0.00549451	0	0	1	0.00191205	0	0	0	0	0	0	0	0	0	0	1	0.00205339	0	0	0	0	0	0	1	0.00202429	1	0.00392157	1	0.00226244	1	0.00227273	0	0	0	0	0
ARHGEF19	0	0	0	0	0	0	0	0	0	0	0	0	0	0	0	0	0	0	0	0	0	0	0	0	0	0	0	0	0	0	0	0	0	0	0	0	0	0	0	0	0	0	0	0	0	0	0	0	0
AXL	0	0	0	0	1	0.000922509	0	0	0	0	1	0.0016835	0	0	0	0	0	0	0	0	0	0	0	0	0	0	0	0	0	0	0	0	0	0	0	0	0	0	0	0	0	0	0	0	0	0	0	0	0
B4GALT1	0	0	0	0	0	0	0	0	0	0	0	0	0	0	0	0	0	0	0	0	0	0	0	0	0	0	0	0	0	0	0	0	0	0	0	0	0	0	0	0	0	0	0	0	0	0	0	0	0
BLK	0	0	0	0	0	0	0	0	0	0	0	0	0	0	0	0	0	0	0	0	0	0	0	0	0	0	0	0	0	0	0	0	0	0	0	0	0	0	0	0	0	0	0	0	0	0	0	0	0
BLOC1S3	0	0	0	0	0	0	0	0	0	0	0	0	0	0	0	0	0	0	0	0	0	0	0	0	0	0	0	0	0	0	0	0	0	0	0	0	0	0	0	0	0	0	0	0	0	0	0	0	0
BLOC1S4	0	0	0	0	0	0	0	0	0	0	0	0	0	0	0	0	0	0	0	0	0	0	0	0	0	0	0	0	0	0	0	0	0	0	0	0	0	0	0	0	0	0	0	0	0	0	0	0	0
BLOC1S6	0	0	0	0	0	0	0	0	0	0	0	0	0	0	0	0	0	0	0	0	0	0	0	0	0	0	0	0	0	0	0	0	0	0	0	0	0	0	0	0	0	0	0	0	0	0	0	0	0
BNC1	0	0	0	0	0	0	0	0	0	0	0	0	0	0	0	0	0	0	0	0	0	0	0	0	0	0	0	0	0	0	0	0	0	0	0	0	0	0	0	0	0	0	0	0	0	0	0	0	0
C1GALT1C1	0	0	0	0	0	0	0	0	0	0	0	0	0	0	0	0	0	0	0	0	0	0	0	0	0	0	0	0	0	0	0	0	0	0	0	0	0	0	0	0	0	0	0	0	0	0	0	0	0
C1QTNF1	0	0	0	0	0	0	0	0	0	0	0	0	0	0	0	0	0	0	0	0	0	0	0	0	0	0	0	0	0	0	0	0	0	0	0	0	0	0	0	0	0	0	0	0	0	0	0	0	0
C3	0	0	0	0	0	0	0	0	0	0	0	0	0	0	0	0	0	0	0	0	0	0	0	0	0	0	0	0	0	0	0	0	0	0	0	0	0	0	0	0	0	0	0	0	0	0	0	0	0
C9	0	0	0	0	0	0	0	0	0	0	0	0	0	0	0	0	0	0	0	0	0	0	0	0	0	0	0	0	0	0	0	0	0	0	0	0	0	0	0	0	0	0	0	0	0	0	0	0	0
CADM4	0	0	0	0	0	0	0	0	0	0	0	0	0	0	0	0	0	0	0	0	0	0	0	0	0	0	0	0	0	0	0	0	0	0	0	0	0	0	0	0	0	0	0	0	0	0	0	0	0
CARMIL2	0	0	0	0	0	0	0	0	0	0	0	0	0	0	0	0	0	0	0	0	0	0	0	0	0	0	0	0	0	0	0	0	0	0	0	0	0	0	0	0	0	0	0	0	0	0	0	0	0
CASK	0	0	0	0	0	0	0	0	0	0	0	0	0	0	0	0	0	0	0	0	0	0	0	0	0	0	0	0	0	0	0	0	0	0	0	0	0	0	0	0	0	0	0	0	0	0	0	0	0
CAV1	0	0	0	0	0	0	0	0	0	0	0	0	0	0	0	0	0	0	0	0	0	0	0	0	0	0	0	0	0	0	0	0	0	0	0	0	0	0	0	0	0	0	0	0	0	0	0	0	0
CAV3	0	0	0	0	0	0	0	0	0	0	0	0	0	0	0	0	0	0	0	0	0	0	0	0	0	0	0	0	0	0	0	0	0	0	0	0	0	0	0	0	0	0	0	0	0	0	0	0	0
CCL2	0	0	0	0	0	0	0	0	0	0	0	0	0	0	0	0	0	0	0	0	0	0	0	0	0	0	0	0	0	0	0	0	0	0	0	0	0	0	0	0	0	0	0	0	0	0	0	0	0
CCM2L	0	0	0	0	0	0	0	0	0	0	0	0	0	0	0	0	0	0	0	0	0	0	0	0	0	0	0	0	0	0	0	0	0	0	0	0	0	0	0	0	0	0	0	0	0	0	0	0	0
CCN1	0	0	0	0	0	0	0	0	0	0	0	0	0	0	0	0	0	0	0	0	0	0	0	0	0	0	0	0	0	0	0	0	0	0	0	0	0	0	0	0	0	0	0	0	0	0	0	0	0
CCN4	0	0	0	0	0	0	0	0	0	0	0	0	0	0	0	0	0	0	0	0	0	0	0	0	0	0	0	0	0	0	0	0	0	0	0	0	0	0	0	0	0	0	0	0	0	0	0	0	0
CCR2	0	0	0	0	0	0	0	0	0	0	0	0	0	0	0	0	0	0	0	0	0	0	0	0	0	0	0	0	0	0	0	0	0	0	0	0	0	0	0	0	0	0	0	0	0	0	0	0	0
CD109	0	0	0	0	0	0	0	0	0	0	0	0	0	0	0	0	0	0	0	0	0	0	0	0	0	0	0	0	0	0	0	0	0	0	0	0	0	0	0	0	0	0	0	0	0	0	0	0	0
CD151	0	0	0	0	0	0	0	0	0	0	0	0	0	0	0	0	0	0	0	0	0	0	0	0	0	0	0	0	0	0	0	0	0	0	0	0	0	0	0	0	0	0	0	0	0	0	0	0	0
CD34	0	0	0	0	0	0	0	0	0	0	0	0	0	0	0	0	0	0	0	0	0	0	0	0	0	0	0	0	0	0	0	0	0	0	0	0	0	0	0	0	0	0	0	0	0	0	0	0	0
CD36	0	0	0	0	0	0	0	0	0	0	0	0	0	0	0	0	0	0	0	0	0	0	0	0	0	0	0	0	0	0	0	0	0	0	0	0	0	0	0	0	0	0	0	0	0	0	0	0	0
CD40LG	0	0	0	0	0	0	0	0	0	0	0	0	0	0	0	0	0	0	0	0	0	0	0	0	0	0	0	0	0	0	0	0	0	0	0	0	0	0	0	0	0	0	0	0	0	0	0	0	0
CD44	0	0	0	0	0	0	0	0	0	0	0	0	0	0	0	0	0	0	0	0	0	0	0	0	0	0	0	0	0	0	0	0	0	0	0	0	0	0	0	0	0	0	0	0	0	0	0	0	0
CD9	0	0	0	0	0	0	0	0	0	0	0	0	0	0	0	0	0	0	0	0	0	0	0	0	0	0	0	0	0	0	0	0	0	0	0	0	0	0	0	0	0	0	0	0	0	0	0	0	0
CDKN1A	0	0	35	0.0851582	2	0.00184502	1	0.003367	0	0	1	0.0016835	0	0	0	0	0	0	2	0.0307692	0	0	0	0	4	0.0107527	0	0	1	0.00205339	0	0	0	0	0	0	0	0	0	0	2	0.00452489	2	0.00454545	0	0	1	0.00200401	0
CEACAM1	0	0	0	0	0	0	0	0	0	0	0	0	0	0	0	0	0	0	0	0	0	0	0	0	0	0	0	0	0	0	0	0	0	0	0	0	0	0	0	0	0	0	0	0	0	0	0	0	0
CELA2A	0	0	0	0	0	0	0	0	0	0	0	0	0	0	0	0	0	0	0	0	0	0	0	0	0	0	0	0	0	0	0	0	0	0	0	0	0	0	0	0	0	0	0	0	0	0	0	0	0
CELSR1	0	0	0	0	0	0	0	0	0	0	0	0	0	0	0	0	0	0	0	0	0	0	0	0	0	0	0	0	0	0	0	0	0	0	0	0	0	0	0	0	0	0	0	0	0	0	0	0	0
CFH	0	0	0	0	0	0	0	0	0	0	0	0	0	0	0	0	0	0	0	0	0	0	0	0	0	0	0	0	0	0	0	0	0	0	0	0	0	0	0	0	0	0	0	0	0	0	0	0	0
CFLAR	0	0	0	0	0	0	0	0	0	0	0	0	0	0	0	0	0	0	0	0	0	0	0	0	0	0	0	0	0	0	0	0	0	0	0	0	0	0	0	0	0	0	0	0	0	0	0	0	0
CLASP1	0	0	0	0	0	0	0	0	0	0	0	0	0	0	0	0	0	0	0	0	0	0	0	0	0	0	0	0	0	0	0	0	0	0	0	0	0	0	0	0	0	0	0	0	0	0	0	0	0
CLASP2	0	0	0	0	0	0	0	0	0	0	0	0	0	0	0	0	0	0	0	0	0	0	0	0	0	0	0	0	0	0	0	0	0	0	0	0	0	0	0	0	0	0	0	0	0	0	0	0	0
CLDN1	0	0	0	0	0	0	0	0	0	0	0	0	0	0	0	0	0	0	0	0	0	0	0	0	0	0	0	0	0	0	0	0	0	0	0	0	0	0	0	0	0	0	0	0	0	0	0	0	0
CLDN19	0	0	0	0	0	0	0	0	0	0	0	0	0	0	0	0	0	0	0	0	0	0	0	0	0	0	0	0	0	0	0	0	0	0	0	0	0	0	0	0	0	0	0	0	0	0	0	0	0
CLDN3	0	0	0	0	0	0	0	0	0	0	0	0	0	0	0	0	0	0	0	0	0	0	0	0	0	0	0	0	0	0	0	0	0	0	0	0	0	0	0	0	0	0	0	0	0	0	0	0	0
CLDN4	0	0	0	0	0	0	0	0	0	0	0	0	0	0	0	0	0	0	0	0	0	0	0	0	0	0	0	0	0	0	0	0	0	0	0	0	0	0	0	0	0	0	0	0	0	0	0	0	0
CLEC10A	0	0	0	0	0	0	0	0	0	0	0	0	0	0	0	0	0	0	0	0	0	0	0	0	0	0	0	0	0	0	0	0	0	0	0	0	0	0	0	0	0	0	0	0	0	0	0	0	0
CNN2	0	0	0	0	0	0	0	0	0	0	0	0	0	0	0	0	0	0	0	0	0	0	0	0	0	0	0	0	0	0	0	0	0	0	0	0	0	0	0	0	0	0	0	0	0	0	0	0	0
COL1A1	0	0	0	0	0	0	0	0	0	0	0	0	0	0	0	0	0	0	0	0	0	0	0	0	0	0	0	0	0	0	0	0	0	0	0	0	0	0	0	0	0	0	0	0	0	0	0	0	0
COL3A1	0	0	0	0	0	0	0	0	0	0	0	0	0	0	0	0	0	0	0	0	0	0	0	0	0	0	0	0	0	0	0	0	0	0	0	0	0	0	0	0	0	0	0	0	0	0	0	0	0
COL5A1	0	0	0	0	0	0	0	0	0	0	0	0	0	0	0	0	0	0	0	0	0	0	0	0	0	0	0	0	0	0	0	0	0	0	0	0	0	0	0	0	0	0	0	0	0	0	0	0	0
COMP	0	0	0	0	0	0	0	0	0	0	0	0	0	0	0	0	0	0	0	0	0	0	0	0	0	0	0	0	0	0	0	0	0	0	0	0	0	0	0	0	0	0	0	0	0	0	0	0	0
CORO1B	0	0	0	0	0	0	0	0	0	0	0	0	0	0	0	0	0	0	0	0	0	0	0	0	0	0	0	0	0	0	0	0	0	0	0	0	0	0	0	0	0	0	0	0	0	0	0	0	0
CPB2	0	0	0	0	0	0	0	0	0	0	0	0	0	0	0	0	0	0	0	0	0	0	0	0	0	0	0	0	0	0	0	0	0	0	0	0	0	0	0	0	0	0	0	0	0	0	0	0	0
CRK	0	0	0	0	0	0	0	0	0	0	0	0	0	0	0	0	0	0	0	0	0	0	0	0	0	0	0	0	0	0	0	0	0	0	0	0	0	0	0	0	0	0	0	0	0	0	0	0	0
CRP	0	0	0	0	0	0	0	0	0	0	0	0	0	0	0	0	0	0	0	0	0	0	0	0	0	0	0	0	0	0	0	0	0	0	0	0	0	0	0	0	0	0	0	0	0	0	0	0	0
CX3CL1	0	0	0	0	0	0	0	0	0	0	0	0	0	0	0	0	0	0	0	0	0	0	0	0	0	0	0	0	0	0	0	0	0	0	0	0	0	0	0	0	0	0	0	0	0	0	0	0	0
CXADR	0	0	0	0	0	0	0	0	0	0	0	0	0	0	0	0	0	0	0	0	0	0	0	0	0	0	0	0	0	0	0	0	0	0	0	0	0	0	0	0	0	0	0	0	0	0	0	0	0
CXCR4	0	0	0	0	0	0	1	0.003367	0	0	1	0.0016835	0	0	0	0	0	0	0	0	0	0	0	0	0	0	0	0	0	0	0	0	0	0	0	0	0	0	0	0	0	0	0	0	0	0	0	0	0
DCBLD2	0	0	0	0	0	0	0	0	0	0	0	0	0	0	0	0	0	0	0	0	0	0	0	0	0	0	0	0	0	0	0	0	0	0	0	0	0	0	0	0	0	0	0	0	0	0	0	0	0
DDR1	0	0	0	0	0	0	0	0	0	0	0	0	0	0	0	0	0	0	0	0	0	0	0	0	0	0	0	0	0	0	0	0	0	0	0	0	0	0	0	0	0	0	0	0	0	0	0	0	0
DMTN	0	0	0	0	0	0	0	0	0	0	0	0	0	0	0	0	0	0	0	0	0	0	0	0	0	0	0	0	0	0	0	0	0	0	0	0	0	0	0	0	0	0	0	0	0	0	0	0	0
DRD5	0	0	0	0	0	0	0	0	0	0	0	0	0	0	0	0	0	0	0	0	0	0	0	0	0	0	0	0	0	0	0	0	0	0	0	0	0	0	0	0	0	0	0	0	0	0	0	0	0
DSP	0	0	0	0	0	0	0	0	0	0	0	0	0	0	0	0	0	0	0	0	0	0	0	0	0	0	0	0	0	0	0	0	0	0	0	0	0	0	0	0	0	0	0	0	0	0	0	0	0
DST	0	0	0	0	0	0	0	0	0	0	0	0	0	0	0	0	0	0	0	0	0	0	0	0	0	0	0	0	0	0	0	0	0	0	0	0	0	0	0	0	0	0	0	0	0	0	0	0	0
DTNBP1	0	0	0	0	0	0	0	0	0	0	0	0	0	0	0	0	0	0	0	0	0	0	0	0	0	0	0	0	0	0	0	0	0	0	0	0	0	0	0	0	0	0	0	0	0	0	0	0	0
DUOX1	0	0	0	0	0	0	0	0	0	0	0	0	0	0	0	0	0	0	0	0	0	0	0	0	0	0	0	0	0	0	0	0	0	0	0	0	0	0	0	0	0	0	0	0	0	0	0	0	0
DUOX2	0	0	0	0	0	0	0	0	0	0	0	0	0	0	0	0	0	0	0	0	0	0	0	0	0	0	0	0	0	0	0	0	0	0	0	0	0	0	0	0	0	0	0	0	0	0	0	0	0
DUSP10	0	0	0	0	0	0	0	0	0	0	0	0	0	0	0	0	0	0	0	0	0	0	0	0	0	0	0	0	0	0	0	0	0	0	0	0	0	0	0	0	0	0	0	0	0	0	0	0	0
DYSF	0	0	0	0	0	0	0	0	0	0	0	0	0	0	0	0	0	0	0	0	0	0	0	0	0	0	0	0	0	0	0	0	0	0	0	0	0	0	0	0	0	0	0	0	0	0	0	0	0
EGFR	0	0	1	0.00243309	3	0.00276753	1	0.003367	0	0	4	0.00673401	1	0.00549451	71	0.121368	3	0.00573614	0	0	0	0	29	0.0564202	2	0.00537634	60	0.106007	5	0.0102669	0	0	2	0.0034188	0	0	0	0	0	0	4	0.00904977	6	0.0136364	0	0	0	0	0
ELK3	0	0	0	0	0	0	0	0	0	0	0	0	0	0	0	0	0	0	0	0	0	0	0	0	0	0	0	0	0	0	0	0	0	0	0	0	0	0	0	0	0	0	0	0	0	0	0	0	0
ENG	0	0	0	0	0	0	0	0	0	0	0	0	0	0	0	0	0	0	0	0	0	0	0	0	0	0	0	0	0	0	0	0	0	0	0	0	0	0	0	0	0	0	0	0	0	0	0	0	0
ENPP4	0	0	0	0	0	0	0	0	0	0	0	0	0	0	0	0	0	0	0	0	0	0	0	0	0	0	0	0	0	0	0	0	0	0	0	0	0	0	0	0	0	0	0	0	0	0	0	0	0
ENTPD1	0	0	0	0	0	0	0	0	0	0	0	0	0	0	0	0	0	0	0	0	0	0	0	0	0	0	0	0	0	0	0	0	0	0	0	0	0	0	0	0	0	0	0	0	0	0	0	0	0
ENTPD2	0	0	0	0	0	0	0	0	0	0	0	0	0	0	0	0	0	0	0	0	0	0	0	0	0	0	0	0	0	0	0	0	0	0	0	0	0	0	0	0	0	0	0	0	0	0	0	0	0
EPB41L4B	0	0	0	0	0	0	0	0	0	0	0	0	0	0	0	0	0	0	0	0	0	0	0	0	0	0	0	0	0	0	0	0	0	0	0	0	0	0	0	0	0	0	0	0	0	0	0	0	0
EPHB2	0	0	0	0	0	0	0	0	0	0	0	0	0	0	0	0	0	0	0	0	0	0	0	0	0	0	0	0	0	0	0	0	0	0	0	0	0	0	0	0	0	0	0	0	0	0	0	0	0
EPPK1	0	0	0	0	0	0	0	0	0	0	0	0	0	0	0	0	0	0	0	0	0	0	0	0	0	0	0	0	0	0	0	0	0	0	0	0	0	0	0	0	0	0	0	0	0	0	0	0	0
ERBB2	0	0	38	0.0924574	18	0.0166052	8	0.026936	1	0.0277778	9	0.0151515	8	0.043956	1	0.0017094	1	0.00191205	0	0	1	0.00195312	0	0	0	0	6	0.0106007	2	0.00410678	0	0	3	0.00512821	2	0.0108696	1	0.00202429	0	0	3	0.00678733	16	0.0363636	0	0	0	0	0
EVL	0	0	0	0	0	0	0	0	0	0	0	0	0	0	0	0	0	0	0	0	0	0	0	0	0	0	0	0	0	0	0	0	0	0	0	0	0	0	0	0	0	0	0	0	0	0	0	0	0
EVPL	0	0	0	0	0	0	0	0	0	0	0	0	0	0	0	0	0	0	0	0	0	0	0	0	0	0	0	0	0	0	0	0	0	0	0	0	0	0	0	0	0	0	0	0	0	0	0	0	0
EXT1	0	0	0	0	0	0	0	0	0	0	0	0	0	0	0	0	0	0	0	0	0	0	0	0	0	0	0	0	0	0	0	0	0	0	0	0	0	0	0	0	0	0	0	0	0	0	0	0	0
F10	0	0	0	0	0	0	0	0	0	0	0	0	0	0	0	0	0	0	0	0	0	0	0	0	0	0	0	0	0	0	0	0	0	0	0	0	0	0	0	0	0	0	0	0	0	0	0	0	0
F11	0	0	0	0	0	0	0	0	0	0	0	0	0	0	0	0	0	0	0	0	0	0	0	0	0	0	0	0	0	0	0	0	0	0	0	0	0	0	0	0	0	0	0	0	0	0	0	0	0
F11R	0	0	0	0	0	0	0	0	0	0	0	0	0	0	0	0	0	0	0	0	0	0	0	0	0	0	0	0	0	0	0	0	0	0	0	0	0	0	0	0	0	0	0	0	0	0	0	0	0
F12	0	0	0	0	0	0	0	0	0	0	0	0	0	0	0	0	0	0	0	0	0	0	0	0	0	0	0	0	0	0	0	0	0	0	0	0	0	0	0	0	0	0	0	0	0	0	0	0	0
F13A1	0	0	0	0	0	0	0	0	0	0	0	0	0	0	0	0	0	0	0	0	0	0	0	0	0	0	0	0	0	0	0	0	0	0	0	0	0	0	0	0	0	0	0	0	0	0	0	0	0
F13B	0	0	0	0	0	0	0	0	0	0	0	0	0	0	0	0	0	0	0	0	0	0	0	0	0	0	0	0	0	0	0	0	0	0	0	0	0	0	0	0	0	0	0	0	0	0	0	0	0
F2	0	0	0	0	0	0	0	0	0	0	0	0	0	0	0	0	0	0	0	0	0	0	0	0	0	0	0	0	0	0	0	0	0	0	0	0	0	0	0	0	0	0	0	0	0	0	0	0	0
F2R	0	0	0	0	0	0	0	0	0	0	0	0	0	0	0	0	0	0	0	0	0	0	0	0	0	0	0	0	0	0	0	0	0	0	0	0	0	0	0	0	0	0	0	0	0	0	0	0	0
F2RL1	0	0	0	0	0	0	0	0	0	0	0	0	0	0	0	0	0	0	0	0	0	0	0	0	0	0	0	0	0	0	0	0	0	0	0	0	0	0	0	0	0	0	0	0	0	0	0	0	0
F2RL2	0	0	0	0	0	0	0	0	0	0	0	0	0	0	0	0	0	0	0	0	0	0	0	0	0	0	0	0	0	0	0	0	0	0	0	0	0	0	0	0	0	0	0	0	0	0	0	0	0
F2RL3	0	0	0	0	0	0	0	0	0	0	0	0	0	0	0	0	0	0	0	0	0	0	0	0	0	0	0	0	0	0	0	0	0	0	0	0	0	0	0	0	0	0	0	0	0	0	0	0	0
F3	0	0	0	0	0	0	0	0	0	0	0	0	0	0	0	0	0	0	0	0	0	0	0	0	0	0	0	0	0	0	0	0	0	0	0	0	0	0	0	0	0	0	0	0	0	0	0	0	0
F5	0	0	0	0	0	0	0	0	0	0	0	0	0	0	0	0	0	0	0	0	0	0	0	0	0	0	0	0	0	0	0	0	0	0	0	0	0	0	0	0	0	0	0	0	0	0	0	0	0
F7	0	0	0	0	0	0	0	0	0	0	0	0	0	0	0	0	0	0	0	0	0	0	0	0	0	0	0	0	0	0	0	0	0	0	0	0	0	0	0	0	0	0	0	0	0	0	0	0	0
F8	0	0	0	0	0	0	0	0	0	0	0	0	0	0	0	0	0	0	0	0	0	0	0	0	0	0	0	0	0	0	0	0	0	0	0	0	0	0	0	0	0	0	0	0	0	0	0	0	0
F9	0	0	0	0	0	0	0	0	0	0	0	0	0	0	0	0	0	0	0	0	0	0	0	0	0	0	0	0	0	0	0	0	0	0	0	0	0	0	0	0	0	0	0	0	0	0	0	0	0
FBLN1	0	0	0	0	0	0	0	0	0	0	0	0	0	0	0	0	0	0	0	0	0	0	0	0	0	0	0	0	0	0	0	0	0	0	0	0	0	0	0	0	0	0	0	0	0	0	0	0	0
FCER1G	0	0	0	0	0	0	0	0	0	0	0	0	0	0	0	0	0	0	0	0	0	0	0	0	0	0	0	0	0	0	0	0	0	0	0	0	0	0	0	0	0	0	0	0	0	0	0	0	0
FER1L5	0	0	0	0	0	0	0	0	0	0	0	0	0	0	0	0	0	0	0	0	0	0	0	0	0	0	0	0	0	0	0	0	0	0	0	0	0	0	0	0	0	0	0	0	0	0	0	0	0
FERMT1	0	0	0	0	0	0	0	0	0	0	0	0	0	0	0	0	0	0	0	0	0	0	0	0	0	0	0	0	0	0	0	0	0	0	0	0	0	0	0	0	0	0	0	0	0	0	0	0	0
FERMT2	0	0	0	0	0	0	0	0	0	0	0	0	0	0	0	0	0	0	0	0	0	0	0	0	0	0	0	0	0	0	0	0	0	0	0	0	0	0	0	0	0	0	0	0	0	0	0	0	0
FERMT3	0	0	0	0	0	0	0	0	0	0	0	0	0	0	0	0	0	0	0	0	0	0	0	0	0	0	0	0	0	0	0	0	0	0	0	0	0	0	0	0	0	0	0	0	0	0	0	0	0
FGA	0	0	0	0	0	0	0	0	0	0	0	0	0	0	0	0	0	0	0	0	0	0	0	0	0	0	0	0	0	0	0	0	0	0	0	0	0	0	0	0	0	0	0	0	0	0	0	0	0
FGB	0	0	0	0	0	0	0	0	0	0	0	0	0	0	0	0	0	0	0	0	0	0	0	0	0	0	0	0	0	0	0	0	0	0	0	0	0	0	0	0	0	0	0	0	0	0	0	0	0
FGF1	0	0	0	0	0	0	0	0	0	0	0	0	0	0	0	0	0	0	0	0	0	0	0	0	0	0	0	0	0	0	0	0	0	0	0	0	0	0	0	0	0	0	0	0	0	0	0	0	0
FGF10	0	0	0	0	0	0	0	0	0	0	0	0	0	0	0	0	0	0	0	0	0	0	0	0	0	0	0	0	0	0	0	0	0	0	0	0	0	0	0	0	0	0	0	0	0	0	0	0	0
FGF2	0	0	0	0	0	0	0	0	0	0	0	0	0	0	0	0	0	0	0	0	0	0	0	0	0	0	0	0	0	0	0	0	0	0	0	0	0	0	0	0	0	0	0	0	0	0	0	0	0
FGF7	0	0	0	0	0	0	0	0	0	0	0	0	0	0	0	0	0	0	0	0	0	0	0	0	0	0	0	0	0	0	0	0	0	0	0	0	0	0	0	0	0	0	0	0	0	0	0	0	0
FGFR1OP2	0	0	0	0	0	0	0	0	0	0	0	0	0	0	0	0	0	0	0	0	0	0	0	0	0	0	0	0	0	0	0	0	0	0	0	0	0	0	0	0	0	0	0	0	0	0	0	0	0
FGG	0	0	0	0	0	0	0	0	0	0	0	0	0	0	0	0	0	0	0	0	0	0	0	0	0	0	0	0	0	0	0	0	0	0	0	0	0	0	0	0	0	0	0	0	0	0	0	0	0
FKBP10	0	0	0	0	0	0	0	0	0	0	0	0	0	0	0	0	0	0	0	0	0	0	0	0	0	0	0	0	0	0	0	0	0	0	0	0	0	0	0	0	0	0	0	0	0	0	0	0	0
FLNA	0	0	0	0	0	0	0	0	0	0	0	0	0	0	0	0	0	0	0	0	0	0	0	0	0	0	0	0	0	0	0	0	0	0	0	0	0	0	0	0	0	0	0	0	0	0	0	0	0
FN1	0	0	0	0	0	0	0	0	0	0	0	0	0	0	0	0	0	0	0	0	0	0	0	0	0	0	0	0	0	0	0	0	0	0	0	0	0	0	0	0	0	0	0	0	0	0	0	0	0
FNTB	0	0	0	0	0	0	0	0	0	0	0	0	0	0	0	0	0	0	0	0	0	0	0	0	0	0	0	0	0	0	0	0	0	0	0	0	0	0	0	0	0	0	0	0	0	0	0	0	0
FOXA2	0	0	0	0	0	0	0	0	0	0	0	0	0	0	0	0	0	0	0	0	0	0	0	0	0	0	0	0	0	0	0	0	0	0	0	0	0	0	0	0	0	0	0	0	0	0	0	0	0
FOXC2	0	0	0	0	0	0	0	0	0	0	0	0	0	0	0	0	0	0	0	0	0	0	0	0	0	0	0	0	0	0	0	0	0	0	0	0	0	0	0	0	0	0	0	0	0	0	0	0	0
FZD6	0	0	0	0	0	0	0	0	0	0	0	0	0	0	0	0	0	0	0	0	0	0	0	0	0	0	0	0	0	0	0	0	0	0	0	0	0	0	0	0	0	0	0	0	0	0	0	0	0
FZD7	0	0	0	0	0	0	0	0	0	0	0	0	0	0	0	0	0	0	0	0	0	0	0	0	0	0	0	0	0	0	0	0	0	0	0	0	0	0	0	0	0	0	0	0	0	0	0	0	0
GAS6	0	0	0	0	0	0	0	0	0	0	0	0	0	0	0	0	0	0	0	0	0	0	0	0	0	0	0	0	0	0	0	0	0	0	0	0	0	0	0	0	0	0	0	0	0	0	0	0	0
GATA1	0	0	0	0	0	0	0	0	0	0	0	0	0	0	0	0	0	0	0	0	0	0	0	0	0	0	1	0.00176678	0	0	0	0	0	0	0	0	0	0	0	0	1	0.00226244	1	0.00227273	0	0	0	0	0
GATA2	0	0	0	0	0	0	0	0	0	0	0	0	0	0	0	0	0	0	0	0	0	0	0	0	0	0	1	0.00176678	0	0	0	0	0	0	0	0	0	0	0	0	0	0	0	0	0	0	0	0	0
GATA4	0	0	0	0	0	0	0	0	0	0	0	0	0	0	0	0	0	0	0	0	0	0	0	0	0	0	0	0	0	0	0	0	0	0	0	0	0	0	0	0	0	0	0	0	0	0	0	0	0
GJA1	0	0	0	0	0	0	0	0	0	0	0	0	0	0	0	0	0	0	0	0	0	0	0	0	0	0	0	0	0	0	0	0	0	0	0	0	0	0	0	0	0	0	0	0	0	0	0	0	0
GNA13	0	0	0	0	0	0	0	0	0	0	0	0	0	0	0	0	0	0	0	0	0	0	0	0	0	0	0	0	0	0	0	0	0	0	0	0	0	0	0	0	0	0	0	0	0	0	0	0	0
GNAS	1	0.0114943	0	0	1	0.000922509	2	0.00673401	0	0	6	0.010101	3	0.0164835	0	0	1	0.00191205	0	0	0	0	0	0	4	0.0107527	5	0.00883392	1	0.00205339	0	0	0	0	6	0.0326087	0	0	0	0	2	0.00452489	5	0.0113636	0	0	1	0.00200401	0
GP1BA	0	0	0	0	0	0	0	0	0	0	0	0	0	0	0	0	0	0	0	0	0	0	0	0	0	0	0	0	0	0	0	0	0	0	0	0	0	0	0	0	0	0	0	0	0	0	0	0	0
GP1BB	0	0	0	0	0	0	0	0	0	0	0	0	0	0	0	0	0	0	0	0	0	0	0	0	0	0	0	0	0	0	0	0	0	0	0	0	0	0	0	0	0	0	0	0	0	0	0	0	0
GP5	0	0	0	0	0	0	0	0	0	0	0	0	0	0	0	0	0	0	0	0	0	0	0	0	0	0	0	0	0	0	0	0	0	0	0	0	0	0	0	0	0	0	0	0	0	0	0	0	0
GP6	0	0	0	0	0	0	0	0	0	0	0	0	0	0	0	0	0	0	0	0	0	0	0	0	0	0	0	0	0	0	0	0	0	0	0	0	0	0	0	0	0	0	0	0	0	0	0	0	0
GP9	0	0	0	0	0	0	0	0	0	0	0	0	0	0	0	0	0	0	0	0	0	0	0	0	0	0	0	0	0	0	0	0	0	0	0	0	0	0	0	0	0	0	0	0	0	0	0	0	0
GPR4	0	0	0	0	0	0	0	0	0	0	0	0	0	0	0	0	0	0	0	0	0	0	0	0	0	0	0	0	0	0	0	0	0	0	0	0	0	0	0	0	0	0	0	0	0	0	0	0	0
GPX1	0	0	0	0	0	0	0	0	0	0	0	0	0	0	0	0	0	0	0	0	0	0	0	0	0	0	0	0	0	0	0	0	0	0	0	0	0	0	0	0	0	0	0	0	0	0	0	0	0
GRHL3	0	0	0	0	0	0	0	0	0	0	0	0	0	0	0	0	0	0	0	0	0	0	0	0	0	0	0	0	0	0	0	0	0	0	0	0	0	0	0	0	0	0	0	0	0	0	0	0	0
HBEGF	0	0	0	0	0	0	0	0	0	0	0	0	0	0	0	0	0	0	0	0	0	0	0	0	0	0	0	0	0	0	0	0	0	0	0	0	0	0	0	0	0	0	0	0	0	0	0	0	0
HGFAC	0	0	0	0	0	0	0	0	0	0	0	0	0	0	0	0	0	0	0	0	0	0	0	0	0	0	0	0	0	0	0	0	0	0	0	0	0	0	0	0	0	0	0	0	0	0	0	0	0
HIF1A	0	0	0	0	0	0	0	0	0	0	0	0	0	0	0	0	0	0	0	0	0	0	0	0	0	0	0	0	0	0	0	0	0	0	0	0	0	0	0	0	0	0	0	0	0	0	0	0	0
HMGB1	0	0	0	0	0	0	0	0	0	0	0	0	0	0	0	0	0	0	0	0	0	0	0	0	0	0	0	0	0	0	0	0	0	0	0	0	0	0	0	0	0	0	0	0	0	0	0	0	0
HMGCR	0	0	0	0	0	0	0	0	0	0	0	0	0	0	0	0	0	0	0	0	0	0	0	0	0	0	0	0	0	0	0	0	0	0	0	0	0	0	0	0	0	0	0	0	0	0	0	0	0
HMOX1	0	0	0	0	0	0	0	0	0	0	0	0	0	0	0	0	0	0	0	0	0	0	0	0	0	0	0	0	0	0	0	0	0	0	0	0	0	0	0	0	0	0	0	0	0	0	0	0	0
HNF4A	0	0	0	0	0	0	0	0	0	0	0	0	0	0	0	0	0	0	0	0	0	0	0	0	0	0	0	0	0	0	0	0	0	0	0	0	0	0	0	0	0	0	0	0	0	0	0	0	0
HPS1	0	0	0	0	0	0	0	0	0	0	0	0	0	0	0	0	0	0	0	0	0	0	0	0	0	0	0	0	0	0	0	0	0	0	0	0	0	0	0	0	0	0	0	0	0	0	0	0	0
HPS4	0	0	0	0	0	0	0	0	0	0	0	0	0	0	0	0	0	0	0	0	0	0	0	0	0	0	0	0	0	0	0	0	0	0	0	0	0	0	0	0	0	0	0	0	0	0	0	0	0
HPS5	0	0	0	0	0	0	0	0	0	0	0	0	0	0	0	0	0	0	0	0	0	0	0	0	0	0	0	0	0	0	0	0	0	0	0	0	0	0	0	0	0	0	0	0	0	0	0	0	0
HPS6	0	0	0	0	0	0	0	0	0	0	0	0	0	0	0	0	0	0	0	0	0	0	0	0	0	0	0	0	0	0	0	0	0	0	0	0	0	0	0	0	0	0	0	0	0	0	0	0	0
HPSE	0	0	0	0	0	0	0	0	0	0	0	0	0	0	0	0	0	0	0	0	0	0	0	0	0	0	0	0	0	0	0	0	0	0	0	0	0	0	0	0	0	0	0	0	0	0	0	0	0
HRAS	0	0	14	0.0340633	3	0.00276753	0	0	0	0	1	0.0016835	0	0	0	0	29	0.0554493	0	0	0	0	0	0	0	0	1	0.00176678	7	0.0143737	0	0	0	0	0	0	3	0.00607287	0	0	4	0.00904977	0	0	0	0	16	0.0320641	9
HRG	0	0	0	0	0	0	0	0	0	0	0	0	0	0	0	0	0	0	0	0	0	0	0	0	0	0	0	0	0	0	0	0	0	0	0	0	0	0	0	0	0	0	0	0	0	0	0	0	0
IGF1	0	0	0	0	0	0	0	0	0	0	0	0	0	0	0	0	0	0	0	0	0	0	0	0	0	0	0	0	0	0	0	0	0	0	0	0	0	0	0	0	0	0	0	0	0	0	0	0	0
IL1A	0	0	0	0	0	0	0	0	0	0	0	0	0	0	0	0	0	0	0	0	0	0	0	0	0	0	0	0	0	0	0	0	0	0	0	0	0	0	0	0	0	0	0	0	0	0	0	0	0
INSL3	0	0	0	0	0	0	0	0	0	0	0	0	0	0	0	0	0	0	0	0	0	0	0	0	0	0	0	0	0	0	0	0	0	0	0	0	0	0	0	0	0	0	0	0	0	0	0	0	0
ITGA2B	0	0	0	0	0	0	0	0	0	0	0	0	0	0	0	0	0	0	0	0	0	0	0	0	0	0	0	0	0	0	0	0	0	0	0	0	0	0	0	0	0	0	0	0	0	0	0	0	0
ITGB1	0	0	0	0	0	0	0	0	0	0	0	0	0	0	0	0	0	0	0	0	0	0	0	0	0	0	0	0	0	0	0	0	0	0	0	0	0	0	0	0	0	0	0	0	0	0	0	0	0
ITGB3	0	0	0	0	0	0	0	0	0	0	0	0	0	0	0	0	0	0	0	0	0	0	0	0	0	0	0	0	0	0	0	0	0	0	0	0	0	0	0	0	0	0	0	0	0	0	0	0	0
JAML	0	0	0	0	0	0	0	0	0	0	0	0	0	0	0	0	0	0	0	0	0	0	0	0	0	0	0	0	0	0	0	0	0	0	0	0	0	0	0	0	0	0	0	0	0	0	0	0	0
KANK1	0	0	0	0	0	0	0	0	0	0	0	0	0	0	0	0	0	0	0	0	0	0	0	0	0	0	0	0	0	0	0	0	0	0	0	0	0	0	0	0	0	0	0	0	0	0	0	0	0
KDR	0	0	0	0	1	0.000922509	0	0	0	0	1	0.0016835	0	0	1	0.0017094	1	0.00191205	0	0	0	0	0	0	1	0.00268817	4	0.00706714	0	0	0	0	0	0	0	0	0	0	0	0	11	0.0248869	1	0.00227273	0	0	0	0	0
KLKB1	0	0	0	0	0	0	0	0	0	0	0	0	0	0	0	0	0	0	0	0	0	0	0	0	0	0	0	0	0	0	0	0	0	0	0	0	0	0	0	0	0	0	0	0	0	0	0	0	0
KNG1	0	0	0	0	0	0	0	0	0	0	0	0	0	0	0	0	0	0	0	0	0	0	0	0	0	0	0	0	0	0	0	0	0	0	0	0	0	0	0	0	0	0	0	0	0	0	0	0	0
KRT6A	0	0	0	0	0	0	0	0	0	0	0	0	0	0	0	0	0	0	0	0	0	0	0	0	0	0	0	0	0	0	0	0	0	0	0	0	0	0	0	0	0	0	0	0	0	0	0	0	0
LNPK	0	0	0	0	0	0	0	0	0	0	0	0	0	0	0	0	0	0	0	0	0	0	0	0	0	0	0	0	0	0	0	0	0	0	0	0	0	0	0	0	0	0	0	0	0	0	0	0	0
LOX	0	0	0	0	0	0	0	0	0	0	0	0	0	0	0	0	0	0	0	0	0	0	0	0	0	0	0	0	0	0	0	0	0	0	0	0	0	0	0	0	0	0	0	0	0	0	0	0	0
LYN	0	0	1	0.00243309	0	0	0	0	0	0	0	0	0	0	0	0	0	0	0	0	0	0	0	0	0	0	0	0	0	0	0	0	0	0	0	0	0	0	0	0	0	0	0	0	0	0	0	0	0
LYST	0	0	0	0	0	0	0	0	0	0	0	0	0	0	0	0	0	0	0	0	0	0	0	0	0	0	0	0	0	0	0	0	0	0	0	0	0	0	0	0	0	0	0	0	0	0	0	0	0
MACF1	0	0	0	0	0	0	0	0	0	0	0	0	0	0	0	0	0	0	0	0	0	0	0	0	0	0	0	0	0	0	0	0	0	0	0	0	0	0	0	0	0	0	0	0	0	0	0	0	0
MAP3K1	0	0	4	0.00973236	73	0.0673432	2	0.00673401	0	0	7	0.0117845	2	0.010989	0	0	1	0.00191205	0	0	2	0.00390625	2	0.00389105	1	0.00268817	1	0.00176678	2	0.00410678	0	0	2	0.0034188	0	0	1	0.00202429	0	0	2	0.00452489	7	0.0159091	0	0	2	0.00400802	0
MERTK	0	0	0	0	0	0	0	0	0	0	0	0	0	0	0	0	0	0	0	0	0	0	0	0	0	0	0	0	0	0	0	0	0	0	0	0	0	0	0	0	0	0	0	0	0	0	0	0	0
MIA3	0	0	0	0	0	0	0	0	0	0	0	0	0	0	0	0	0	0	0	0	0	0	0	0	0	0	0	0	0	0	0	0	0	0	0	0	0	0	0	0	0	0	0	0	0	0	0	0	0
MMP12	0	0	0	0	0	0	0	0	0	0	0	0	0	0	0	0	0	0	0	0	0	0	0	0	0	0	0	0	0	0	0	0	0	0	0	0	0	0	0	0	0	0	0	0	0	0	0	0	0
MMRN1	0	0	0	0	0	0	0	0	0	0	0	0	0	0	0	0	0	0	0	0	0	0	0	0	0	0	0	0	0	0	0	0	0	0	0	0	0	0	0	0	0	0	0	0	0	0	0	0	0
MPIG6B	0	0	0	0	0	0	0	0	0	0	0	0	0	0	0	0	0	0	0	0	0	0	0	0	0	0	0	0	0	0	0	0	0	0	0	0	0	0	0	0	0	0	0	0	0	0	0	0	0
MRTFA	0	0	0	0	0	0	0	0	0	0	0	0	0	0	0	0	0	0	0	0	0	0	0	0	0	0	0	0	0	0	0	0	0	0	0	0	0	0	0	0	0	0	0	0	0	0	0	0	0
MSX2	0	0	0	0	0	0	0	0	0	0	0	0	0	0	0	0	0	0	0	0	0	0	0	0	0	0	0	0	0	0	0	0	0	0	0	0	0	0	0	0	0	0	0	0	0	0	0	0	0
MTOR	0	0	1	0.00243309	2	0.00184502	4	0.013468	0	0	6	0.010101	0	0	5	0.00854701	1	0.00191205	1	0.0153846	21	0.0410156	3	0.00583658	1	0.00268817	2	0.00353357	1	0.00205339	1	0.0114943	1	0.0017094	0	0	0	0	0	0	2	0.00452489	1	0.00227273	0	0	0	0	0
MUC16	0	0	0	0	0	0	0	0	0	0	0	0	0	0	0	0	0	0	0	0	0	0	0	0	0	0	0	0	0	0	0	0	0	0	0	0	0	0	0	0	0	0	0	0	0	0	0	0	0
MUSTN1	0	0	0	0	0	0	0	0	0	0	0	0	0	0	0	0	0	0	0	0	0	0	0	0	0	0	0	0	0	0	0	0	0	0	0	0	0	0	0	0	0	0	0	0	0	0	0	0	0
MYH10	0	0	0	0	0	0	0	0	0	0	0	0	0	0	0	0	0	0	0	0	0	0	0	0	0	0	0	0	0	0	0	0	0	0	0	0	0	0	0	0	0	0	0	0	0	0	0	0	0
MYH2	0	0	0	0	0	0	0	0	0	0	0	0	0	0	0	0	0	0	0	0	0	0	0	0	0	0	0	0	0	0	0	0	0	0	0	0	0	0	0	0	0	0	0	0	0	0	0	0	0
MYH9	0	0	0	0	0	0	0	0	0	0	0	0	0	0	0	0	0	0	0	0	0	0	0	0	0	0	0	0	0	0	0	0	0	0	0	0	0	0	0	0	0	0	0	0	0	0	0	0	0
MYLK	0	0	0	0	0	0	0	0	0	0	0	0	0	0	0	0	0	0	0	0	0	0	0	0	0	0	0	0	0	0	0	0	0	0	0	0	0	0	0	0	0	0	0	0	0	0	0	0	0
MYOF	0	0	0	0	0	0	0	0	0	0	0	0	0	0	0	0	0	0	0	0	0	0	0	0	0	0	0	0	0	0	0	0	0	0	0	0	0	0	0	0	0	0	0	0	0	0	0	0	0
MYOZ1	0	0	0	0	0	0	0	0	0	0	0	0	0	0	0	0	0	0	0	0	0	0	0	0	0	0	0	0	0	0	0	0	0	0	0	0	0	0	0	0	0	0	0	0	0	0	0	0	0
NACA	0	0	0	0	0	0	0	0	0	0	0	0	0	0	0	0	0	0	0	0	0	0	0	0	0	0	0	0	0	0	0	0	0	0	0	0	0	0	0	0	0	0	0	0	0	0	0	0	0
NBEAL2	0	0	0	0	0	0	0	0	0	0	0	0	0	0	0	0	0	0	0	0	0	0	0	0	0	0	0	0	0	0	0	0	0	0	0	0	0	0	0	0	0	0	0	0	0	0	0	0	0
NDNF	0	0	0	0	0	0	0	0	0	0	0	0	0	0	0	0	0	0	0	0	0	0	0	0	0	0	0	0	0	0	0	0	0	0	0	0	0	0	0	0	0	0	0	0	0	0	0	0	0
NF1	5	0.0574713	16	0.0389294	26	0.0239852	7	0.023569	0	0	13	0.0218855	1	0.00549451	34	0.0581197	4	0.00764818	0	0	4	0.0078125	26	0.0505837	4	0.0107527	38	0.0671378	27	0.0554415	0	0	23	0.0393162	2	0.0108696	1	0.00202429	7	0.027451	49	0.11086	13	0.0295455	1	0.00671141	1	0.00200401	1
NFE2L2	0	0	19	0.0462287	1	0.000922509	12	0.040404	1	0.0277778	0	0	16	0.0879121	0	0	22	0.042065	0	0	4	0.0078125	0	0	9	0.0241935	10	0.0176678	67	0.137577	0	0	0	0	1	0.00543478	0	0	0	0	0	0	0	0	0	0	0	0	0
NLRP6	0	0	0	0	0	0	0	0	0	0	0	0	0	0	0	0	0	0	0	0	0	0	0	0	0	0	0	0	0	0	0	0	0	0	0	0	0	0	0	0	0	0	0	0	0	0	0	0	0
NOG	0	0	0	0	0	0	0	0	0	0	0	0	0	0	0	0	0	0	0	0	0	0	0	0	0	0	0	0	0	0	0	0	0	0	0	0	0	0	0	0	0	0	0	0	0	0	0	0	0
NOTCH2	0	0	1	0.00243309	7	0.00645756	1	0.003367	0	0	7	0.0117845	1	0.00549451	4	0.00683761	10	0.0191205	0	0	3	0.00585938	2	0.00389105	1	0.00268817	6	0.0106007	5	0.0102669	0	0	2	0.0034188	0	0	2	0.00404858	1	0.00392157	5	0.0113122	5	0.0113636	0	0	0	0	0
NR4A3	0	0	0	0	0	0	0	0	0	0	0	0	0	0	0	0	0	0	0	0	0	0	0	0	0	0	0	0	0	0	0	0	0	0	0	0	0	0	0	0	0	0	0	0	0	0	0	0	0
P2RX1	0	0	0	0	0	0	0	0	0	0	0	0	0	0	0	0	0	0	0	0	0	0	0	0	0	0	0	0	0	0	0	0	0	0	0	0	0	0	0	0	0	0	0	0	0	0	0	0	0
P2RY1	0	0	0	0	0	0	0	0	0	0	0	0	0	0	0	0	0	0	0	0	0	0	0	0	0	0	0	0	0	0	0	0	0	0	0	0	0	0	0	0	0	0	0	0	0	0	0	0	0
P2RY12	0	0	0	0	0	0	0	0	0	0	0	0	0	0	0	0	0	0	0	0	0	0	0	0	0	0	0	0	0	0	0	0	0	0	0	0	0	0	0	0	0	0	0	0	0	0	0	0	0
PAK1	0	0	0	0	0	0	0	0	0	0	0	0	0	0	0	0	0	0	0	0	0	0	0	0	0	0	0	0	0	0	0	0	0	0	0	0	0	0	0	0	0	0	0	0	0	0	0	0	0
PAPSS2	0	0	0	0	0	0	0	0	0	0	0	0	0	0	0	0	0	0	0	0	0	0	0	0	0	0	0	0	0	0	0	0	0	0	0	0	0	0	0	0	0	0	0	0	0	0	0	0	0
PARD3	0	0	0	0	0	0	0	0	0	0	0	0	0	0	0	0	0	0	0	0	0	0	0	0	0	0	0	0	0	0	0	0	0	0	0	0	0	0	0	0	0	0	0	0	0	0	0	0	0
PDCD10	0	0	0	0	0	0	0	0	0	0	0	0	0	0	0	0	0	0	0	0	0	0	0	0	0	0	0	0	0	0	0	0	0	0	0	0	0	0	0	0	0	0	0	0	0	0	0	0	0
PDGFA	0	0	0	0	0	0	0	0	0	0	0	0	0	0	0	0	0	0	0	0	0	0	0	0	0	0	0	0	0	0	0	0	0	0	0	0	0	0	0	0	0	0	0	0	0	0	0	0	0
PDGFB	0	0	0	0	1	0.000922509	0	0	0	0	0	0	0	0	7	0.0119658	1	0.00191205	0	0	0	0	2	0.00389105	0	0	0	0	0	0	0	0	0	0	0	0	0	0	0	0	3	0.00678733	0	0	0	0	0	0	0
PDGFRA	0	0	0	0	0	0	0	0	0	0	0	0	0	0	0	0	0	0	0	0	0	0	0	0	0	0	0	0	0	0	0	0	0	0	0	0	0	0	0	0	0	0	0	0	0	0	0	0	0
PDPN	0	0	0	0	0	0	0	0	0	0	0	0	0	0	0	0	0	0	0	0	0	0	0	0	0	0	0	0	0	0	0	0	0	0	0	0	0	0	0	0	0	0	0	0	0	0	0	0	0
PEAR1	0	0	0	0	0	0	0	0	0	0	0	0	0	0	0	0	0	0	0	0	0	0	0	0	0	0	0	0	0	0	0	0	0	0	0	0	0	0	0	0	0	0	0	0	0	0	0	0	0
PECAM1	0	0	0	0	0	0	0	0	0	0	0	0	0	0	0	0	0	0	0	0	0	0	0	0	0	0	0	0	0	0	0	0	0	0	0	0	0	0	0	0	0	0	0	0	0	0	0	0	0
PF4	0	0	0	0	0	0	0	0	0	0	0	0	0	0	0	0	0	0	0	0	0	0	0	0	0	0	0	0	0	0	0	0	0	0	0	0	0	0	0	0	0	0	0	0	0	0	0	0	0
PHLDB2	0	0	1	0.00243309	2	0.00184502	0	0	0	0	2	0.003367	0	0	4	0.00683761	1	0.00191205	0	0	0	0	0	0	0	0	0	0	0	0	0	0	0	0	0	0	1	0.00202429	0	0	1	0.00226244	4	0.00909091	1	0.00671141	1	0.00200401	0
PIK3CB	0	0	0	0	0	0	0	0	0	0	0	0	0	0	0	0	0	0	0	0	0	0	0	0	0	0	0	0	0	0	0	0	0	0	0	0	0	0	0	0	0	0	0	0	0	0	0	0	0
PIP5K1C	0	0	0	0	0	0	0	0	0	0	0	0	0	0	0	0	0	0	0	0	0	0	0	0	0	0	0	0	0	0	0	0	0	0	0	0	0	0	0	0	0	0	0	0	0	0	0	0	0
PLA2G4A	0	0	0	0	0	0	0	0	0	0	0	0	0	0	0	0	0	0	0	0	0	0	0	0	0	0	0	0	0	0	0	0	0	0	0	0	0	0	0	0	0	0	0	0	0	0	0	0	0
PLAU	0	0	0	0	0	0	0	0	0	0	0	0	0	0	0	0	0	0	0	0	0	0	0	0	0	0	0	0	0	0	0	0	0	0	0	0	0	0	0	0	0	0	0	0	0	0	0	0	0
PLEC	0	0	0	0	0	0	0	0	0	0	0	0	0	0	0	0	0	0	0	0	0	0	0	0	0	0	0	0	0	0	0	0	0	0	0	0	0	0	0	0	0	0	0	0	0	0	0	0	0
PLEK	0	0	0	0	0	0	0	0	0	0	0	0	0	0	0	0	0	0	0	0	0	0	0	0	0	0	0	0	0	0	0	0	0	0	0	0	0	0	0	0	0	0	0	0	0	0	0	0	0
PLET1	0	0	0	0	0	0	0	0	0	0	0	0	0	0	0	0	0	0	0	0	0	0	0	0	0	0	0	0	0	0	0	0	0	0	0	0	0	0	0	0	0	0	0	0	0	0	0	0	0
PLG	0	0	0	0	0	0	0	0	0	0	0	0	0	0	0	0	0	0	0	0	0	0	0	0	0	0	0	0	0	0	0	0	0	0	0	0	0	0	0	0	0	0	0	0	0	0	0	0	0
PLPP3	0	0	0	0	0	0	0	0	0	0	0	0	0	0	0	0	0	0	0	0	0	0	0	0	0	0	0	0	0	0	0	0	0	0	0	0	0	0	0	0	0	0	0	0	0	0	0	0	0
POU2F3	0	0	0	0	0	0	0	0	0	0	0	0	0	0	0	0	0	0	0	0	0	0	0	0	0	0	0	0	0	0	0	0	0	0	0	0	0	0	0	0	0	0	0	0	0	0	0	0	0
PPARA	0	0	0	0	0	0	0	0	0	0	0	0	0	0	0	0	0	0	0	0	0	0	0	0	0	0	0	0	0	0	0	0	0	0	0	0	0	0	0	0	0	0	0	0	0	0	0	0	0
PPARD	0	0	0	0	0	0	0	0	0	0	0	0	0	0	0	0	0	0	0	0	0	0	0	0	0	0	0	0	0	0	0	0	0	0	0	0	0	0	0	0	0	0	0	0	0	0	0	0	0
PPIA	0	0	0	0	0	0	0	0	0	0	0	0	0	0	0	0	0	0	0	0	0	0	0	0	0	0	0	0	0	0	0	0	0	0	0	0	0	0	0	0	0	0	0	0	0	0	0	0	0
PPL	0	0	0	0	0	0	0	0	0	0	0	0	0	0	0	0	0	0	0	0	0	0	0	0	0	0	0	0	0	0	0	0	0	0	0	0	0	0	0	0	0	0	0	0	0	0	0	0	0
PRCP	0	0	0	0	0	0	0	0	0	0	0	0	0	0	0	0	0	0	0	0	0	0	0	0	0	0	0	0	0	0	0	0	0	0	0	0	0	0	0	0	0	0	0	0	0	0	0	0	0
PRDX2	0	0	0	0	0	0	0	0	0	0	0	0	0	0	0	0	0	0	0	0	0	0	0	0	0	0	0	0	0	0	0	0	0	0	0	0	0	0	0	0	0	0	0	0	0	0	0	0	0
PRKCA	0	0	0	0	0	0	0	0	0	0	0	0	0	0	0	0	0	0	0	0	0	0	0	0	0	0	0	0	0	0	0	0	0	0	0	0	0	0	0	0	0	0	0	0	0	0	0	0	0
PRKCD	0	0	0	0	0	0	0	0	0	0	0	0	0	0	0	0	0	0	0	0	0	0	0	0	0	0	0	0	0	0	0	0	0	0	0	0	0	0	0	0	0	0	0	0	0	0	0	0	0
PRKCE	0	0	0	0	0	0	0	0	0	0	0	0	0	0	0	0	0	0	0	0	0	0	0	0	0	0	0	0	0	0	0	0	0	0	0	0	0	0	0	0	0	0	0	0	0	0	0	0	0
PRKCQ	0	0	0	0	0	0	0	0	0	0	0	0	0	0	0	0	0	0	0	0	0	0	0	0	0	0	0	0	0	0	0	0	0	0	0	0	0	0	0	0	0	0	0	0	0	0	0	0	0
PRKG1	0	0	0	0	0	0	0	0	0	0	0	0	0	0	0	0	0	0	0	0	0	0	0	0	0	0	0	0	0	0	0	0	0	0	0	0	0	0	0	0	0	0	0	0	0	0	0	0	0
PROC	0	0	0	0	0	0	0	0	0	0	0	0	0	0	0	0	0	0	0	0	0	0	0	0	0	0	0	0	0	0	0	0	0	0	0	0	0	0	0	0	0	0	0	0	0	0	0	0	0
PROCR	0	0	0	0	0	0	0	0	0	0	0	0	0	0	0	0	0	0	0	0	0	0	0	0	0	0	0	0	0	0	0	0	0	0	0	0	0	0	0	0	0	0	0	0	0	0	0	0	0
PROS1	0	0	0	0	0	0	0	0	0	0	0	0	0	0	0	0	0	0	0	0	0	0	0	0	0	0	0	0	0	0	0	0	0	0	0	0	0	0	0	0	0	0	0	0	0	0	0	0	0
PROZ	0	0	0	0	0	0	0	0	0	0	0	0	0	0	0	0	0	0	0	0	0	0	0	0	0	0	0	0	0	0	0	0	0	0	0	0	0	0	0	0	0	0	0	0	0	0	0	0	0
PRSS56	0	0	11	0.026764	54	0.0498155	20	0.0673401	1	0.0277778	33	0.0555556	3	0.0164835	114	0.194872	11	0.0210325	3	0.0461538	11	0.0214844	22	0.0428016	5	0.0134409	8	0.0141343	48	0.0985626	0	0	6	0.0102564	0	0	16	0.0323887	6	0.0235294	35	0.0791855	33	0.075	0	0	2	0.00400802	0
PTEN	0	0	0	0	0	0	0	0	0	0	0	0	0	0	0	0	0	0	0	0	0	0	0	0	0	0	0	0	0	0	0	0	0	0	0	0	0	0	0	0	0	0	0	0	0	0	0	0	0
PTGER3	0	0	0	0	0	0	0	0	0	0	0	0	0	0	0	0	0	0	0	0	0	0	0	0	0	0	0	0	0	0	0	0	0	0	0	0	0	0	0	0	0	0	0	0	0	0	0	0	0
PTGER4	0	0	0	0	0	0	0	0	0	0	0	0	0	0	0	0	0	0	0	0	0	0	0	0	0	0	0	0	0	0	0	0	0	0	0	0	0	0	0	0	0	0	0	0	0	0	0	0	0
PTK2	0	0	0	0	0	0	0	0	0	0	0	0	0	0	0	0	0	0	0	0	0	0	0	0	0	0	0	0	0	0	0	0	0	0	0	0	0	0	0	0	0	0	0	0	0	0	0	0	0
PTK7	0	0	0	0	0	0	0	0	0	0	0	0	0	0	0	0	0	0	0	0	0	0	0	0	0	0	0	0	0	0	0	0	0	0	0	0	0	0	0	0	0	0	0	0	0	0	0	0	0
PTPN6	0	0	0	0	0	0	0	0	0	0	0	0	0	0	0	0	0	0	0	0	0	0	0	0	0	0	0	0	0	0	0	0	0	0	0	0	0	0	0	0	0	0	0	0	0	0	0	0	0
PTPRJ	0	0	0	0	0	0	0	0	0	0	0	0	0	0	0	0	0	0	0	0	0	0	0	0	0	0	0	0	0	0	0	0	0	0	0	0	0	0	0	0	0	0	0	0	0	0	0	0	0
RAB27A	0	0	0	0	0	0	0	0	0	0	0	0	0	0	0	0	0	0	0	0	0	0	0	0	0	0	0	0	0	0	0	0	0	0	0	0	0	0	0	0	0	0	0	0	0	0	0	0	0
RAB3A	0	0	0	0	0	0	0	0	0	0	0	0	0	0	0	0	0	0	0	0	0	0	0	0	0	0	0	0	0	0	0	0	0	0	0	0	0	0	0	0	0	0	0	0	0	0	0	0	0
RAP2B	0	0	0	0	0	0	0	0	0	0	0	0	0	0	0	0	0	0	0	0	0	0	0	0	0	0	0	0	0	0	0	0	0	0	0	0	0	0	0	0	0	0	0	0	0	0	0	0	0
REG3A	0	0	0	0	0	0	0	0	0	0	0	0	0	0	0	0	0	0	0	0	0	0	0	0	0	0	0	0	0	0	0	0	0	0	0	0	0	0	0	0	0	0	0	0	0	0	0	0	0
REG3G	0	0	0	0	0	0	0	0	0	0	0	0	0	0	0	0	0	0	0	0	0	0	0	0	0	0	0	0	0	0	0	0	0	0	0	0	0	0	0	0	0	0	0	0	0	0	0	0	0
RREB1	0	0	0	0	0	0	0	0	0	0	0	0	0	0	0	0	0	0	0	0	0	0	0	0	0	0	0	0	0	0	0	0	0	0	0	0	0	0	0	0	0	0	0	0	0	0	0	0	0
S100A9	0	0	0	0	0	0	0	0	0	0	0	0	0	0	0	0	0	0	0	0	0	0	0	0	0	0	0	0	0	0	0	0	0	0	0	0	0	0	0	0	0	0	0	0	0	0	0	0	0
SCNN1B	0	0	0	0	0	0	0	0	0	0	0	0	0	0	0	0	0	0	0	0	0	0	0	0	0	0	0	0	0	0	0	0	0	0	0	0	0	0	0	0	0	0	0	0	0	0	0	0	0
SCNN1G	0	0	0	0	0	0	0	0	0	0	0	0	0	0	0	0	0	0	0	0	0	0	0	0	0	0	0	0	0	0	0	0	0	0	0	0	0	0	0	0	0	0	0	0	0	0	0	0	0
SCRIB	0	0	0	0	0	0	0	0	0	0	0	0	0	0	0	0	0	0	0	0	0	0	0	0	0	0	0	0	0	0	0	0	0	0	0	0	0	0	0	0	0	0	0	0	0	0	0	0	0
SDC1	0	0	0	0	0	0	0	0	0	0	0	0	0	0	0	0	0	0	0	0	0	0	0	0	0	0	0	0	0	0	0	0	0	0	0	0	0	0	0	0	0	0	0	0	0	0	0	0	0
SDC4	0	0	0	0	0	0	0	0	0	0	0	0	0	0	0	0	0	0	0	0	0	0	0	0	0	0	0	0	0	0	0	0	0	0	0	0	0	0	0	0	0	0	0	0	0	0	0	0	0
SELP	0	0	0	0	0	0	0	0	0	0	0	0	0	0	0	0	0	0	0	0	0	0	0	0	0	0	0	0	0	0	0	0	0	0	0	0	0	0	0	0	0	0	0	0	0	0	0	0	0
SERPINA10	0	0	0	0	0	0	0	0	0	0	0	0	0	0	0	0	0	0	0	0	0	0	0	0	0	0	0	0	0	0	0	0	0	0	0	0	0	0	0	0	0	0	0	0	0	0	0	0	0
SERPINB2	0	0	0	0	0	0	0	0	0	0	0	0	0	0	0	0	0	0	0	0	0	0	0	0	0	0	0	0	0	0	0	0	0	0	0	0	0	0	0	0	0	0	0	0	0	0	0	0	0
SERPINC1	0	0	0	0	0	0	0	0	0	0	0	0	0	0	0	0	0	0	0	0	0	0	0	0	0	0	0	0	0	0	0	0	0	0	0	0	0	0	0	0	0	0	0	0	0	0	0	0	0
SERPIND1	0	0	0	0	0	0	0	0	0	0	0	0	0	0	0	0	0	0	0	0	0	0	0	0	0	0	0	0	0	0	0	0	0	0	0	0	0	0	0	0	0	0	0	0	0	0	0	0	0
SERPINE1	0	0	0	0	0	0	0	0	0	0	0	0	0	0	0	0	0	0	0	0	0	0	0	0	0	0	0	0	0	0	0	0	0	0	0	0	0	0	0	0	0	0	0	0	0	0	0	0	0
SERPINE2	0	0	0	0	0	0	0	0	0	0	0	0	0	0	0	0	0	0	0	0	0	0	0	0	0	0	0	0	0	0	0	0	0	0	0	0	0	0	0	0	0	0	0	0	0	0	0	0	0
SERPINF2	0	0	0	0	0	0	0	0	0	0	0	0	0	0	0	0	0	0	0	0	0	0	0	0	0	0	0	0	0	0	0	0	0	0	0	0	0	0	0	0	0	0	0	0	0	0	0	0	0
SERPING1	0	0	0	0	1	0.000922509	0	0	0	0	2	0.003367	0	0	0	0	0	0	0	0	0	0	0	0	1	0.00268817	0	0	0	0	0	0	0	0	0	0	0	0	0	0	0	0	0	0	0	0	1	0.00200401	0
SH2B3	0	0	0	0	0	0	0	0	0	0	0	0	0	0	0	0	0	0	0	0	0	0	0	0	0	0	0	0	0	0	0	0	0	0	0	0	0	0	0	0	0	0	0	0	0	0	0	0	0
SHH	0	0	0	0	0	0	0	0	0	0	0	0	0	0	0	0	0	0	0	0	0	0	0	0	0	0	0	0	0	0	0	0	0	0	0	0	0	0	0	0	0	0	0	0	0	0	0	0	0
SLC11A1	0	0	0	0	0	0	0	0	0	0	0	0	0	0	0	0	0	0	0	0	0	0	0	0	0	0	0	0	0	0	0	0	0	0	0	0	0	0	0	0	0	0	0	0	0	0	0	0	0
SLC12A2	0	0	0	0	0	0	0	0	0	0	0	0	0	0	0	0	0	0	0	0	0	0	0	0	0	0	0	0	0	0	0	0	0	0	0	0	0	0	0	0	0	0	0	0	0	0	0	0	0
SLC4A1	0	0	0	0	0	0	0	0	0	0	0	0	0	0	0	0	0	0	0	0	0	0	0	0	0	0	0	0	0	0	0	0	0	0	0	0	0	0	0	0	0	0	0	0	0	0	0	0	0
SLC7A11	0	0	2	0.00486618	0	0	3	0.010101	0	0	13	0.0218855	1	0.00549451	0	0	0	0	1	0.0153846	0	0	0	0	0	0	2	0.00353357	1	0.00205339	0	0	0	0	1	0.00543478	0	0	0	0	5	0.0113122	1	0.00227273	0	0	0	0	0
SMAD3	0	0	2	0.00486618	9	0.00830258	10	0.03367	0	0	55	0.0925926	11	0.0604396	0	0	10	0.0191205	0	0	0	0	0	0	3	0.00806452	19	0.0335689	5	0.0102669	0	0	1	0.0017094	36	0.195652	3	0.00607287	2	0.00784314	4	0.00904977	26	0.0590909	0	0	0	0	0
SMAD4	0	0	0	0	0	0	0	0	0	0	0	0	0	0	0	0	0	0	0	0	0	0	0	0	0	0	0	0	0	0	0	0	0	0	0	0	0	0	0	0	0	0	0	0	0	0	0	0	0
SMOC2	0	0	0	0	0	0	0	0	0	0	0	0	0	0	0	0	0	0	0	0	0	0	0	0	0	0	0	0	0	0	0	0	0	0	0	0	0	0	0	0	0	0	0	0	0	0	0	0	0
SNAI2	0	0	0	0	0	0	0	0	0	0	0	0	0	0	0	0	0	0	0	0	0	0	0	0	0	0	0	0	0	0	0	0	0	0	0	0	0	0	0	0	0	0	0	0	0	0	0	0	0
SRF	0	0	0	0	0	0	0	0	0	0	0	0	0	0	0	0	0	0	0	0	0	0	0	0	0	0	0	0	0	0	0	0	0	0	0	0	0	0	0	0	0	0	0	0	0	0	0	0	0
SRSF6	0	0	0	0	0	0	0	0	0	0	0	0	0	0	0	0	0	0	0	0	0	0	0	0	0	0	0	0	0	0	0	0	0	0	0	0	0	0	0	0	0	0	0	0	0	0	0	0	0
ST3GAL4	0	0	0	0	0	0	0	0	0	0	0	0	0	0	0	0	0	0	0	0	0	0	0	0	0	0	0	0	0	0	0	0	0	0	0	0	0	0	0	0	0	0	0	0	0	0	0	0	0
STARD13	0	0	0	0	0	0	0	0	0	0	0	0	0	0	0	0	0	0	0	0	0	0	0	0	0	0	0	0	0	0	0	0	0	0	0	0	0	0	0	0	0	0	0	0	0	0	0	0	0
STXBP1	0	0	0	0	0	0	0	0	0	0	0	0	0	0	0	0	0	0	0	0	0	0	0	0	0	0	0	0	0	0	0	0	0	0	0	0	0	0	0	0	0	0	0	0	0	0	0	0	0
STXBP3	0	0	0	0	0	0	0	0	0	0	0	0	0	0	0	0	0	0	0	0	0	0	0	0	0	0	1	0.00176678	0	0	0	0	0	0	0	0	1	0.00202429	0	0	1	0.00226244	0	0	0	0	0	0	0
SYK	0	0	0	0	0	0	0	0	0	0	0	0	0	0	0	0	0	0	0	0	0	0	0	0	0	0	0	0	0	0	0	0	0	0	0	0	0	0	0	0	0	0	0	0	0	0	0	0	0
SYT11	0	0	0	0	0	0	0	0	0	0	0	0	0	0	0	0	0	0	0	0	0	0	0	0	0	0	0	0	0	0	0	0	0	0	0	0	0	0	0	0	0	0	0	0	0	0	0	0	0
SYT7	0	0	0	0	0	0	0	0	0	0	0	0	0	0	0	0	0	0	0	0	0	0	0	0	0	0	0	0	0	0	0	0	0	0	0	0	0	0	0	0	0	0	0	0	0	0	0	0	0
SYTL4	0	0	0	0	0	0	0	0	0	0	0	0	0	0	0	0	0	0	0	0	0	0	0	0	0	0	0	0	0	0	0	0	0	0	0	0	0	0	0	0	0	0	0	0	0	0	0	0	0
TBXA2R	0	0	0	0	0	0	0	0	0	0	0	0	0	0	0	0	0	0	0	0	0	0	0	0	0	0	0	0	0	0	0	0	0	0	0	0	0	0	0	0	0	0	0	0	0	0	0	0	0
TFPI	0	0	0	0	0	0	0	0	0	0	0	0	0	0	0	0	0	0	0	0	0	0	0	0	0	0	0	0	0	0	0	0	0	0	0	0	0	0	0	0	0	0	0	0	0	0	0	0	0
TFPI2	0	0	0	0	0	0	0	0	0	0	0	0	0	0	0	0	0	0	0	0	0	0	0	0	0	0	0	0	0	0	0	0	0	0	0	0	0	0	0	0	0	0	0	0	0	0	0	0	0
TGFB1	0	0	0	0	0	0	0	0	0	0	0	0	0	0	0	0	0	0	0	0	0	0	0	0	0	0	0	0	0	0	0	0	0	0	0	0	0	0	0	0	0	0	0	0	0	0	0	0	0
TGFB2	0	0	0	0	0	0	0	0	0	0	0	0	0	0	0	0	0	0	0	0	0	0	0	0	0	0	0	0	0	0	0	0	0	0	0	0	0	0	0	0	0	0	0	0	0	0	0	0	0
THBD	0	0	0	0	0	0	0	0	0	0	0	0	0	0	0	0	0	0	0	0	0	0	0	0	0	0	0	0	0	0	0	0	0	0	0	0	0	0	0	0	0	0	0	0	0	0	0	0	0
THBS1	0	0	0	0	0	0	0	0	0	0	0	0	0	0	0	0	0	0	0	0	0	0	0	0	0	0	0	0	0	0	0	0	0	0	0	0	0	0	0	0	0	0	0	0	0	0	0	0	0
TIMP1	0	0	0	0	0	0	0	0	0	0	0	0	0	0	0	0	0	0	0	0	0	0	0	0	0	0	0	0	0	0	0	0	0	0	0	0	0	0	0	0	0	0	0	0	0	0	0	0	0
TLR4	0	0	0	0	0	0	0	0	0	0	0	0	0	0	0	0	0	0	0	0	0	0	0	0	0	0	0	0	0	0	0	0	0	0	0	0	0	0	0	0	0	0	0	0	0	0	0	0	0
TMEFF2	0	0	0	0	0	0	0	0	0	0	0	0	0	0	0	0	0	0	0	0	0	0	0	0	0	0	0	0	0	0	0	0	0	0	0	0	0	0	0	0	0	0	0	0	0	0	0	0	0
TNF	0	0	0	0	0	0	0	0	0	0	0	0	0	0	0	0	0	0	0	0	0	0	0	0	0	0	0	0	0	0	0	0	0	0	0	0	0	0	0	0	0	0	0	0	0	0	0	0	0
TNFRSF12A	0	0	0	0	0	0	0	0	0	0	0	0	0	0	0	0	0	0	0	0	0	0	0	0	0	0	0	0	0	0	0	0	0	0	0	0	0	0	0	0	0	0	0	0	0	0	0	0	0
TOR1A	0	0	0	0	0	0	0	0	0	0	0	0	0	0	0	0	0	0	0	0	0	0	0	0	0	0	0	0	0	0	0	0	0	0	0	0	0	0	0	0	0	0	0	0	0	0	0	0	0
TPM1	0	0	0	0	0	0	0	0	0	0	0	0	0	0	0	0	0	0	0	0	0	0	0	0	0	0	0	0	0	0	0	0	0	0	0	0	0	0	0	0	0	0	0	0	0	0	0	0	0
TPSAB1	0	0	0	0	0	0	0	0	0	0	0	0	0	0	0	0	0	0	0	0	0	0	0	0	0	0	0	0	0	0	0	0	0	0	0	0	0	0	0	0	0	0	0	0	0	0	0	0	0
TREML1	0	0	0	0	0	0	0	0	0	0	0	0	0	0	0	0	0	0	0	0	0	0	0	0	0	0	0	0	0	0	0	0	0	0	0	0	0	0	0	0	0	0	0	0	0	0	0	0	0
TRIM72	0	0	0	0	0	0	0	0	0	0	0	0	0	0	0	0	0	0	0	0	0	0	0	0	0	0	0	0	0	0	0	0	0	0	0	0	0	0	0	0	0	0	0	0	0	0	0	0	0
TSPAN32	0	0	0	0	0	0	0	0	0	0	0	0	0	0	0	0	0	0	0	0	0	0	0	0	0	0	0	0	0	0	0	0	0	0	0	0	0	0	0	0	0	0	0	0	0	0	0	0	0
TSPAN8	0	0	0	0	0	0	0	0	0	0	0	0	0	0	0	0	0	0	0	0	0	0	0	0	0	0	0	0	0	0	0	0	0	0	0	0	0	0	0	0	0	0	0	0	0	0	0	0	0
TXK	0	0	0	0	0	0	0	0	0	0	0	0	0	0	0	0	0	0	0	0	0	0	0	0	0	0	0	0	0	0	0	0	0	0	0	0	0	0	0	0	0	0	0	0	0	0	0	0	0
TYRO3	0	0	0	0	0	0	0	0	0	0	0	0	0	0	0	0	0	0	0	0	0	0	0	0	0	0	0	0	0	0	0	0	0	0	0	0	0	0	0	0	0	0	0	0	0	0	0	0	0
UBASH3A	0	0	0	0	0	0	0	0	0	0	0	0	0	0	0	0	0	0	0	0	0	0	0	0	0	0	0	0	0	0	0	0	0	0	0	0	0	0	0	0	0	0	0	0	0	0	0	0	0
UBASH3B	0	0	0	0	0	0	0	0	0	0	0	0	0	0	0	0	0	0	0	0	0	0	0	0	0	0	0	0	0	0	0	0	0	0	0	0	0	0	0	0	0	0	0	0	0	0	0	0	0
VANGL2	0	0	0	0	0	0	0	0	0	0	0	0	0	0	0	0	0	0	0	0	0	0	0	0	0	0	0	0	0	0	0	0	0	0	0	0	0	0	0	0	0	0	0	0	0	0	0	0	0
VEGFA	0	0	0	0	0	0	0	0	0	0	0	0	0	0	0	0	0	0	0	0	0	0	0	0	0	0	0	0	0	0	0	0	0	0	0	0	0	0	0	0	0	0	0	0	0	0	0	0	0
VEGFB	0	0	0	0	0	0	0	0	0	0	0	0	0	0	0	0	0	0	0	0	0	0	0	0	0	0	0	0	0	0	0	0	0	0	0	0	0	0	0	0	0	0	0	0	0	0	0	0	0
VIL1	0	0	0	0	0	0	0	0	0	0	0	0	0	0	0	0	0	0	0	0	0	0	0	0	0	0	0	0	0	0	0	0	0	0	0	0	0	0	0	0	0	0	0	0	0	0	0	0	0
VKORC1	0	0	0	0	0	0	0	0	0	0	0	0	0	0	0	0	0	0	0	0	0	0	0	0	0	0	0	0	0	0	0	0	0	0	0	0	0	0	0	0	0	0	0	0	0	0	0	0	0
VPS33B	0	0	0	0	0	0	0	0	0	0	0	0	0	0	0	0	0	0	0	0	0	0	0	0	0	0	0	0	0	0	0	0	0	0	0	0	0	0	0	0	0	0	0	0	0	0	0	0	0
VWF	0	0	0	0	0	0	0	0	0	0	0	0	0	0	0	0	0	0	0	0	0	0	0	0	0	0	0	0	0	0	0	0	0	0	0	0	0	0	0	0	0	0	0	0	0	0	0	0	0
WFDC1	0	0	0	0	0	0	0	0	0	0	0	0	0	0	0	0	0	0	0	0	0	0	0	0	0	0	0	0	0	0	0	0	0	0	0	0	0	0	0	0	0	0	0	0	0	0	0	0	0
WNT3A	0	0	0	0	0	0	0	0	0	0	0	0	0	0	0	0	0	0	0	0	0	0	0	0	0	0	0	0	0	0	0	0	0	0	0	0	0	0	0	0	0	0	0	0	0	0	0	0	0
WNT4	0	0	0	0	0	0	0	0	0	0	0	0	0	0	0	0	0	0	0	0	0	0	0	0	0	0	0	0	0	0	0	0	0	0	0	0	0	0	0	0	0	0	0	0	0	0	0	0	0
WNT5A	0	0	0	0	0	0	0	0	0	0	0	0	0	0	0	0	0	0	0	0	0	0	0	0	0	0	0	0	0	0	0	0	0	0	0	0	0	0	0	0	0	0	0	0	0	0	0	0	0
WNT7A	0	0	0	0	0	0	0	0	0	0	0	0	0	0	0	0	0	0	0	0	0	0	0	0	0	0	0	0	0	0	0	0	0	0	0	0	0	0	0	0	0	0	0	0	0	0	0	0	0
XBP1	0	0	0	0	0	0	0	0	0	0	0	0	0	0	0	0	0	0	0	0	0	0	0	0	0	0	0	0	0	0	0	0	0	0	0	0	0	0	0	0	0	0	0	0	0	0	0	0	0
YAP1	0	0	0	0	0	0	0	0	0	0	0	0	0	0	0	0	0	0	0	0	0	0	0	0	0	0	0	0	0	0	0	0	0	0	0	0	0	0	0	0	0	0	0	0	0	0	0	0	0
[truncated: 8 more columns]

## Sheet: ST6
Supplementary Table 6. Mean frequency of mRNA high alteration per TCGA Pan-Cancer type
Genes	ACC		BLCA		BRCA		CESC		CHOL		COAD		ESCA		GBM		HNSC		KICH		KIRC		LGG		LIHC		LUAD		LUSC		MESO		OV		PAAD		PRAD		SARC		SKCM		STAD		TGCT		THCA		THYM
	N = 87	f	N = 411	f	N = 1084	f	N = 297	f	N = 36	f	N = 594	f	N = 182	f	N = 585	f	N = 523	f	N = 65	f	N = 512	f	N = 514	f	N = 372	f	N = 566	f	N = 487	f	N = 87	f	N = 585	f	N = 184	f	N = 494	f	N = 255	f	N = 442	f	N = 440	f	N = 149	f	N = 499	f	N = 123
ABAT	29	0.333333	20	0.0486618	156	0.143911	10	0.03367	2	0.0555556	44	0.0740741	14	0.0769231	4	0.00683761	26	0.0497132	2	0.0307692	13	0.0253906	21	0.040856	12	0.0322581	27	0.0477032	11	0.0225873	6	0.0689655	24	0.0410256	7	0.0380435	17	0.034413	2	0.00784314	23	0.0520362	24	0.0545455	9	0.0604027	27	0.0541082	7
ABCC8	2	0.0229885	9	0.0218978	40	0.0369004	5	0.016835	3	0.0833333	17	0.0286195	6	0.032967	7	0.0119658	6	0.0114723	1	0.0153846	2	0.00390625	22	0.0428016	5	0.0134409	13	0.0229682	5	0.0102669	2	0.0229885	1	0.0017094	6	0.0326087	24	0.048583	2	0.00784314	3	0.00678733	6	0.0136364	7	0.0469799	35	0.0701403	6
ACTA2	4	0.045977	9	0.0218978	42	0.0387454	6	0.020202	5	0.138889	22	0.037037	6	0.032967	2	0.0034188	16	0.0305927	4	0.0615385	17	0.0332031	10	0.0194553	8	0.0215054	19	0.0335689	11	0.0225873	2	0.0229885	13	0.0222222	8	0.0434783	14	0.0283401	11	0.0431373	13	0.0294118	14	0.0318182	10	0.0671141	23	0.0460922	6
ACTG1	4	0.045977	26	0.0632603	91	0.0839483	16	0.0538721	3	0.0833333	19	0.0319865	13	0.0714286	5	0.00854701	21	0.040153	2	0.0307692	22	0.0429688	26	0.0505837	37	0.0994624	55	0.0971731	30	0.0616016	8	0.091954	20	0.034188	6	0.0326087	23	0.0465587	15	0.0588235	24	0.0542986	16	0.0363636	11	0.0738255	21	0.0420842	1
ACVRL1	3	0.0344828	14	0.0340633	36	0.0332103	9	0.030303	2	0.0555556	31	0.0521886	7	0.0384615	5	0.00854701	20	0.0382409	2	0.0307692	19	0.0371094	27	0.0525292	15	0.0403226	13	0.0229682	13	0.026694	3	0.0344828	17	0.0290598	6	0.0326087	18	0.0364372	19	0.0745098	11	0.0248869	22	0.05	9	0.0604027	14	0.0280561	4
ADAMTS13	7	0.0804598	21	0.0510949	44	0.0405904	16	0.0538721	1	0.0277778	37	0.0622896	9	0.0494505	5	0.00854701	38	0.0726577	3	0.0461538	21	0.0410156	20	0.0389105	10	0.0268817	20	0.0353357	20	0.0410678	4	0.045977	5	0.00854701	7	0.0380435	37	0.0748988	11	0.0431373	21	0.0475113	32	0.0727273	4	0.0268456	24	0.0480962	9
ADAMTS18	3	0.0344828	7	0.0170316	25	0.0230627	4	0.013468	1	0.0277778	13	0.0218855	2	0.010989	4	0.00683761	5	0.00956023	7	0.107692	19	0.0371094	23	0.0447471	13	0.0349462	10	0.0176678	2	0.00410678	4	0.045977	19	0.0324786	6	0.0326087	9	0.0182186	4	0.0156863	17	0.0384615	7	0.0159091	3	0.0201342	17	0.0340681	11
ADIPOR2	3	0.0344828	40	0.0973236	44	0.0405904	19	0.0639731	5	0.138889	63	0.106061	18	0.0989011	14	0.0239316	69	0.131931	2	0.0307692	17	0.0332031	30	0.0583658	16	0.0430108	43	0.0759717	104	0.213552	6	0.0689655	60	0.102564	14	0.076087	22	0.0445344	26	0.101961	19	0.0429864	51	0.115909	0	0	36	0.0721443	4
ADRA2A	11	0.126437	18	0.0437956	29	0.0267528	10	0.03367	1	0.0277778	29	0.0488215	5	0.0274725	28	0.0478632	16	0.0305927	3	0.0461538	23	0.0449219	22	0.0428016	8	0.0215054	16	0.0282686	10	0.0205339	1	0.0114943	6	0.0102564	9	0.048913	21	0.0425101	8	0.0313725	7	0.0158371	16	0.0363636	5	0.033557	15	0.0300601	5
ADRA2C	4	0.045977	8	0.0194647	55	0.050738	9	0.030303	1	0.0277778	31	0.0521886	6	0.032967	9	0.0153846	36	0.0688337	1	0.0153846	15	0.0292969	24	0.0466926	16	0.0430108	14	0.024735	52	0.106776	3	0.0344828	14	0.0239316	4	0.0217391	27	0.0546559	9	0.0352941	28	0.0633484	11	0.025	6	0.0402685	6	0.012024	7
ADRB1	3	0.0344828	13	0.0316302	17	0.0156827	10	0.03367	1	0.0277778	20	0.03367	8	0.043956	3	0.00512821	17	0.0325048	1	0.0153846	8	0.015625	20	0.0389105	7	0.0188172	21	0.0371025	14	0.0287474	1	0.0114943	9	0.0153846	14	0.076087	16	0.0323887	2	0.00784314	22	0.0497738	28	0.0636364	7	0.0469799	11	0.0220441	3
ADRB2	5	0.0574713	16	0.0389294	26	0.0239852	8	0.026936	2	0.0555556	28	0.047138	6	0.032967	8	0.0136752	18	0.0344168	2	0.0307692	11	0.0214844	24	0.0466926	23	0.061828	16	0.0282686	5	0.0102669	1	0.0114943	13	0.0222222	6	0.0326087	25	0.0506073	14	0.054902	21	0.0475113	12	0.0272727	7	0.0469799	28	0.0561122	6
ADTRP	6	0.0689655	25	0.0608273	21	0.0193727	18	0.0606061	2	0.0555556	32	0.0538721	14	0.0769231	4	0.00683761	13	0.0248566	2	0.0307692	10	0.0195312	14	0.0272374	12	0.0322581	17	0.0300353	10	0.0205339	7	0.0804598	11	0.0188034	8	0.0434783	19	0.0384615	15	0.0588235	16	0.0361991	21	0.0477273	8	0.0536913	13	0.0260521	7
AGER	2	0.0229885	18	0.0437956	58	0.0535055	14	0.047138	1	0.0277778	27	0.0454545	8	0.043956	4	0.00683761	27	0.0516252	7	0.107692	27	0.0527344	9	0.0175097	24	0.0645161	13	0.0229682	5	0.0102669	1	0.0114943	18	0.0307692	6	0.0326087	20	0.0404858	14	0.054902	11	0.0248869	20	0.0454545	7	0.0469799	19	0.0380762	3
AHNAK2	3	0.0344828	17	0.0413625	58	0.0535055	13	0.043771	3	0.0833333	19	0.0319865	14	0.0769231	6	0.0102564	53	0.101338	2	0.0307692	23	0.0449219	27	0.0525292	4	0.0107527	22	0.0388693	27	0.0554415	2	0.0229885	18	0.0307692	13	0.0706522	19	0.0384615	12	0.0470588	25	0.0565611	15	0.0340909	6	0.0402685	22	0.0440882	5
AJAP1	3	0.0344828	6	0.0145985	9	0.00830258	13	0.043771	0	0	9	0.0151515	5	0.0274725	10	0.017094	25	0.0478011	3	0.0461538	20	0.0390625	16	0.0311284	21	0.0564516	10	0.0176678	14	0.0287474	3	0.0344828	21	0.0358974	7	0.0380435	17	0.034413	10	0.0392157	8	0.0180995	9	0.0204545	8	0.0536913	24	0.0480962	5
AJUBA	4	0.045977	22	0.053528	43	0.0396679	16	0.0538721	1	0.0277778	20	0.03367	9	0.0494505	5	0.00854701	32	0.0611855	4	0.0615385	13	0.0253906	6	0.0116732	19	0.0510753	37	0.065371	26	0.0533881	3	0.0344828	17	0.0290598	13	0.0706522	22	0.0445344	15	0.0588235	21	0.0475113	7	0.0159091	13	0.0872483	22	0.0440882	5
ALOX12	3	0.0344828	16	0.0389294	48	0.0442804	16	0.0538721	2	0.0555556	28	0.047138	17	0.0934066	21	0.0358974	22	0.042065	5	0.0769231	23	0.0449219	37	0.0719844	23	0.061828	15	0.0265018	8	0.0164271	3	0.0344828	13	0.0222222	5	0.0271739	20	0.0404858	5	0.0196078	9	0.020362	26	0.0590909	4	0.0268456	28	0.0561122	4
ALOX15	4	0.045977	26	0.0632603	19	0.0175277	14	0.047138	3	0.0833333	7	0.0117845	3	0.0164835	8	0.0136752	24	0.0458891	2	0.0307692	19	0.0371094	22	0.0428016	7	0.0188172	14	0.024735	12	0.0246407	4	0.045977	14	0.0239316	6	0.0326087	2	0.00404858	9	0.0352941	29	0.0656109	4	0.00909091	14	0.0939597	2	0.00400802	4
ALOX5	3	0.0344828	27	0.0656934	31	0.0285978	10	0.03367	3	0.0833333	46	0.0774411	13	0.0714286	2	0.0034188	21	0.040153	5	0.0769231	15	0.0292969	7	0.0136187	1	0.00268817	7	0.0123675	20	0.0410678	3	0.0344828	11	0.0188034	3	0.0163043	23	0.0465587	5	0.0196078	7	0.0158371	14	0.0318182	9	0.0604027	6	0.012024	4
ANO6	11	0.126437	25	0.0608273	31	0.0285978	13	0.043771	1	0.0277778	30	0.0505051	7	0.0384615	5	0.00854701	23	0.0439771	2	0.0307692	37	0.0722656	31	0.0603113	14	0.0376344	20	0.0353357	22	0.0451745	5	0.0574713	20	0.034188	11	0.0597826	17	0.034413	8	0.0313725	15	0.0339367	18	0.0409091	9	0.0604027	21	0.0420842	5
ANXA1	5	0.0574713	17	0.0413625	52	0.0479705	19	0.0639731	1	0.0277778	9	0.0151515	5	0.0274725	5	0.00854701	20	0.0382409	3	0.0461538	13	0.0253906	31	0.0603113	12	0.0322581	16	0.0282686	13	0.026694	5	0.0574713	11	0.0188034	4	0.0217391	20	0.0404858	19	0.0745098	17	0.0384615	8	0.0181818	4	0.0268456	10	0.0200401	2
ANXA2	1	0.0114943	14	0.0340633	43	0.0396679	17	0.0572391	4	0.111111	18	0.030303	6	0.032967	9	0.0153846	23	0.0439771	3	0.0461538	34	0.0664062	24	0.0466926	22	0.0591398	13	0.0229682	26	0.0533881	7	0.0804598	4	0.00683761	7	0.0380435	21	0.0425101	23	0.0901961	35	0.0791855	17	0.0386364	5	0.033557	19	0.0380762	8
ANXA5	8	0.091954	16	0.0389294	47	0.0433579	11	0.037037	0	0	21	0.0353535	5	0.0274725	4	0.00683761	28	0.0535373	4	0.0615385	27	0.0527344	22	0.0428016	14	0.0376344	19	0.0335689	11	0.0225873	2	0.0229885	3	0.00512821	7	0.0380435	22	0.0445344	13	0.0509804	18	0.040724	18	0.0409091	2	0.0134228	14	0.0280561	4
ANXA6	23	0.264368	14	0.0340633	31	0.0285978	9	0.030303	2	0.0555556	34	0.0572391	7	0.0384615	6	0.0102564	13	0.0248566	4	0.0615385	32	0.0625	20	0.0389105	16	0.0430108	13	0.0229682	7	0.0143737	3	0.0344828	11	0.0188034	11	0.0597826	15	0.0303644	12	0.0470588	19	0.0429864	18	0.0409091	3	0.0201342	25	0.0501002	6
ANXA8	1	0.0114943	21	0.0510949	42	0.0387454	10	0.03367	1	0.0277778	6	0.010101	10	0.0549451	11	0.0188034	27	0.0516252	5	0.0769231	7	0.0136719	14	0.0272374	11	0.0295699	16	0.0282686	18	0.036961	4	0.045977	9	0.0153846	8	0.0434783	17	0.034413	15	0.0588235	33	0.0746606	13	0.0295455	1	0.00671141	9	0.0180361	8
AP3B1	20	0.229885	7	0.0170316	59	0.054428	7	0.023569	3	0.0833333	11	0.0185185	4	0.021978	4	0.00683761	10	0.0191205	1	0.0153846	28	0.0546875	19	0.036965	25	0.0672043	16	0.0282686	6	0.0123203	4	0.045977	3	0.00512821	4	0.0217391	10	0.0202429	18	0.0705882	19	0.0429864	12	0.0272727	1	0.00671141	22	0.0440882	2
APOE	3	0.0344828	29	0.0705596	22	0.0202952	21	0.0707071	2	0.0555556	21	0.0353535	4	0.021978	5	0.00854701	29	0.0554493	5	0.0769231	18	0.0351562	12	0.0233463	19	0.0510753	10	0.0176678	13	0.026694	4	0.045977	4	0.00683761	6	0.0326087	21	0.0425101	10	0.0392157	26	0.0588235	21	0.0477273	5	0.033557	24	0.0480962	6
APOH	1	0.0114943	12	0.0291971	10	0.00922509	11	0.037037	1	0.0277778	12	0.020202	4	0.021978	4	0.00683761	12	0.0229446	3	0.0461538	10	0.0195312	4	0.0077821	28	0.0752688	7	0.0123675	2	0.00410678	1	0.0114943	8	0.0136752	8	0.0434783	13	0.0263158	9	0.0352941	5	0.0113122	3	0.00681818	13	0.0872483	7	0.0140281	5
AQP1	3	0.0344828	14	0.0340633	39	0.0359779	11	0.037037	2	0.0555556	46	0.0774411	2	0.010989	24	0.0410256	22	0.042065	3	0.0461538	25	0.0488281	55	0.107004	5	0.0134409	25	0.0441696	17	0.0349076	7	0.0804598	7	0.0119658	7	0.0380435	28	0.0566802	10	0.0392157	9	0.020362	24	0.0545455	4	0.0268456	18	0.0360721	3
ARFGEF1	17	0.195402	70	0.170316	216	0.199262	17	0.0572391	5	0.138889	145	0.244108	25	0.137363	7	0.0119658	49	0.0936902	5	0.0769231	14	0.0273438	26	0.0505837	73	0.196237	80	0.141343	65	0.13347	6	0.0689655	51	0.0871795	15	0.0815217	45	0.0910931	24	0.0941176	69	0.156109	72	0.163636	69	0.463087	16	0.0320641	3
ARHGAP24	9	0.103448	14	0.0340633	33	0.0304428	16	0.0538721	1	0.0277778	24	0.040404	7	0.0384615	6	0.0102564	27	0.0516252	5	0.0769231	12	0.0234375	16	0.0311284	5	0.0134409	18	0.0318021	13	0.026694	2	0.0229885	6	0.0102564	5	0.0271739	17	0.034413	10	0.0392157	18	0.040724	11	0.025	6	0.0402685	34	0.0681363	5
ARHGAP35	10	0.114943	37	0.0900243	67	0.0618081	27	0.0909091	3	0.0833333	35	0.0589226	13	0.0714286	5	0.00854701	31	0.0592734	3	0.0461538	22	0.0429688	5	0.00972763	21	0.0564516	22	0.0388693	46	0.0944559	2	0.0229885	12	0.0205128	14	0.076087	14	0.0283401	13	0.0509804	20	0.0452489	37	0.0840909	11	0.0738255	25	0.0501002	7
ARHGEF19	3	0.0344828	21	0.0510949	38	0.0350554	14	0.047138	0	0	23	0.0387205	5	0.0274725	11	0.0188034	23	0.0439771	1	0.0153846	16	0.03125	17	0.0330739	17	0.0456989	38	0.0671378	24	0.0492813	4	0.045977	14	0.0239316	7	0.0380435	22	0.0445344	11	0.0431373	35	0.0791855	28	0.0636364	7	0.0469799	24	0.0480962	8
AXL	2	0.0229885	26	0.0632603	50	0.0461255	15	0.0505051	3	0.0833333	20	0.03367	5	0.0274725	7	0.0119658	22	0.042065	2	0.0307692	26	0.0507812	16	0.0311284	15	0.0403226	18	0.0318021	26	0.0533881	4	0.045977	14	0.0239316	9	0.048913	16	0.0323887	28	0.109804	20	0.0452489	16	0.0363636	10	0.0671141	15	0.0300601	3
B4GALT1	3	0.0344828	20	0.0486618	29	0.0267528	18	0.0606061	3	0.0833333	42	0.0707071	13	0.0714286	4	0.00683761	26	0.0497132	1	0.0153846	24	0.046875	14	0.0272374	11	0.0295699	21	0.0371025	30	0.0616016	1	0.0114943	9	0.0153846	11	0.0597826	18	0.0364372	18	0.0705882	12	0.0271493	31	0.0704545	11	0.0738255	21	0.0420842	6
BLK	7	0.0804598	2	0.00486618	12	0.0110701	8	0.026936	1	0.0277778	16	0.026936	1	0.00549451	4	0.00683761	6	0.0114723	2	0.0307692	17	0.0332031	21	0.040856	4	0.0107527	11	0.0194346	1	0.00205339	2	0.0229885	18	0.0307692	5	0.0271739	13	0.0263158	4	0.0156863	4	0.00904977	10	0.0227273	7	0.0469799	14	0.0280561	4
BLOC1S3	5	0.0574713	60	0.145985	80	0.0738007	36	0.121212	4	0.111111	35	0.0589226	5	0.0274725	9	0.0153846	22	0.042065	4	0.0615385	24	0.046875	15	0.0291829	28	0.0752688	24	0.0424028	47	0.0965092	2	0.0229885	15	0.025641	7	0.0380435	20	0.0404858	24	0.0941176	22	0.0497738	40	0.0909091	8	0.0536913	19	0.0380762	5
BLOC1S4	16	0.183908	31	0.0754258	51	0.047048	11	0.037037	1	0.0277778	20	0.03367	11	0.0604396	7	0.0119658	27	0.0516252	9	0.138462	15	0.0292969	23	0.0447471	21	0.0564516	32	0.0565371	20	0.0410678	3	0.0344828	28	0.0478632	10	0.0543478	18	0.0364372	28	0.109804	32	0.0723982	24	0.0545455	5	0.033557	21	0.0420842	5
BLOC1S6	9	0.103448	12	0.0291971	29	0.0267528	14	0.047138	2	0.0555556	16	0.026936	7	0.0384615	6	0.0102564	8	0.0152964	2	0.0307692	15	0.0292969	19	0.036965	15	0.0403226	13	0.0229682	20	0.0410678	3	0.0344828	13	0.0222222	7	0.0380435	17	0.034413	23	0.0901961	13	0.0294118	10	0.0227273	5	0.033557	10	0.0200401	1
BNC1	3	0.0344828	24	0.0583942	27	0.0249077	11	0.037037	1	0.0277778	13	0.0218855	7	0.0384615	3	0.00512821	22	0.042065	5	0.0769231	10	0.0195312	8	0.0155642	7	0.0188172	8	0.0141343	33	0.0677618	7	0.0804598	20	0.034188	7	0.0380435	16	0.0323887	9	0.0352941	18	0.040724	9	0.0204545	10	0.0671141	22	0.0440882	12
C1GALT1C1	4	0.045977	12	0.0291971	60	0.0553506	11	0.037037	1	0.0277778	23	0.0387205	16	0.0879121	6	0.0102564	24	0.0458891	2	0.0307692	20	0.0390625	18	0.0350195	32	0.0860215	32	0.0565371	29	0.0595483	5	0.0574713	18	0.0307692	15	0.0815217	19	0.0384615	7	0.027451	12	0.0271493	29	0.0659091	4	0.0268456	14	0.0280561	8
C1QTNF1	4	0.045977	15	0.0364964	51	0.047048	2	0.00673401	4	0.111111	27	0.0454545	7	0.0384615	9	0.0153846	23	0.0439771	1	0.0153846	35	0.0683594	17	0.0330739	3	0.00806452	21	0.0371025	14	0.0287474	8	0.091954	11	0.0188034	7	0.0380435	19	0.0384615	7	0.027451	19	0.0429864	16	0.0363636	10	0.0671141	24	0.0480962	5
C3	1	0.0114943	11	0.026764	59	0.054428	7	0.023569	3	0.0833333	26	0.043771	5	0.0274725	6	0.0102564	21	0.040153	3	0.0461538	26	0.0507812	23	0.0447471	10	0.0268817	23	0.040636	16	0.0328542	5	0.0574713	10	0.017094	6	0.0326087	17	0.034413	14	0.054902	12	0.0271493	14	0.0318182	6	0.0402685	21	0.0420842	6
C9	11	0.126437	25	0.0608273	5	0.00461255	15	0.0505051	3	0.0833333	6	0.010101	2	0.010989	2	0.0034188	42	0.0803059	5	0.0769231	6	0.0117188	16	0.0311284	19	0.0510753	44	0.0777385	3	0.00616016	6	0.0689655	20	0.034188	6	0.0326087	22	0.0445344	3	0.0117647	13	0.0294118	18	0.0409091	9	0.0604027	15	0.0300601	4
CADM4	8	0.091954	43	0.104623	55	0.050738	23	0.0774411	1	0.0277778	37	0.0622896	2	0.010989	9	0.0153846	27	0.0516252	4	0.0615385	38	0.0742188	16	0.0311284	15	0.0403226	45	0.0795053	32	0.0657084	2	0.0229885	19	0.0324786	5	0.0271739	17	0.034413	3	0.0117647	16	0.0361991	22	0.05	8	0.0536913	21	0.0420842	11
CARMIL2	3	0.0344828	14	0.0340633	32	0.0295203	12	0.040404	1	0.0277778	25	0.0420875	3	0.0164835	6	0.0102564	16	0.0305927	5	0.0769231	10	0.0195312	25	0.0486381	17	0.0456989	30	0.0530035	2	0.00410678	4	0.045977	8	0.0136752	5	0.0271739	24	0.048583	4	0.0156863	8	0.0180995	17	0.0386364	6	0.0402685	14	0.0280561	3
CASK	5	0.0574713	29	0.0705596	47	0.0433579	12	0.040404	4	0.111111	23	0.0387205	12	0.0659341	7	0.0119658	25	0.0478011	0	0	26	0.0507812	24	0.0466926	24	0.0645161	26	0.0459364	25	0.0513347	3	0.0344828	26	0.0444444	8	0.0434783	30	0.0607287	24	0.0941176	17	0.0384615	20	0.0454545	18	0.120805	26	0.0521042	4
CAV1	2	0.0229885	18	0.0437956	49	0.045203	23	0.0774411	2	0.0555556	13	0.0218855	22	0.120879	20	0.034188	29	0.0554493	3	0.0461538	34	0.0664062	32	0.0622568	18	0.0483871	22	0.0388693	21	0.0431211	2	0.0229885	8	0.0136752	8	0.0434783	21	0.0425101	14	0.054902	47	0.106335	15	0.0340909	5	0.033557	26	0.0521042	9
CAV3	6	0.0689655	14	0.0340633	3	0.00276753	5	0.016835	0	0	3	0.00505051	8	0.043956	3	0.00512821	13	0.0248566	3	0.0461538	24	0.046875	4	0.0077821	16	0.0430108	8	0.0141343	4	0.00821355	4	0.045977	2	0.0034188	5	0.0271739	9	0.0182186	7	0.027451	1	0.00226244	19	0.0431818	3	0.0201342	3	0.00601202	9
CCL2	1	0.0114943	14	0.0340633	27	0.0249077	5	0.016835	3	0.0833333	31	0.0521886	8	0.043956	7	0.0119658	19	0.0363289	2	0.0307692	25	0.0488281	13	0.0252918	14	0.0376344	19	0.0335689	11	0.0225873	2	0.0229885	9	0.0153846	5	0.0271739	21	0.0425101	12	0.0470588	8	0.0180995	17	0.0386364	7	0.0469799	14	0.0280561	4
CCM2L	3	0.0344828	12	0.0291971	35	0.0322878	29	0.0976431	2	0.0555556	18	0.030303	6	0.032967	5	0.00854701	21	0.040153	5	0.0769231	17	0.0332031	18	0.0350195	17	0.0456989	16	0.0282686	29	0.0595483	2	0.0229885	11	0.0188034	9	0.048913	22	0.0445344	8	0.0313725	21	0.0475113	17	0.0386364	10	0.0671141	19	0.0380762	4
CCN1	5	0.0574713	13	0.0316302	31	0.0285978	20	0.0673401	4	0.111111	33	0.0555556	8	0.043956	2	0.0034188	17	0.0325048	4	0.0615385	20	0.0390625	12	0.0233463	13	0.0349462	20	0.0353357	13	0.026694	2	0.0229885	10	0.017094	5	0.0271739	16	0.0323887	9	0.0352941	12	0.0271493	13	0.0295455	7	0.0469799	25	0.0501002	6
CCN4	5	0.0574713	11	0.026764	33	0.0304428	17	0.0572391	4	0.111111	32	0.0538721	7	0.0384615	13	0.0222222	27	0.0516252	1	0.0153846	29	0.0566406	7	0.0136187	12	0.0322581	19	0.0335689	28	0.0574949	5	0.0574713	30	0.0512821	13	0.0706522	19	0.0384615	16	0.0627451	18	0.040724	10	0.0227273	14	0.0939597	22	0.0440882	4
CCR2	5	0.0574713	14	0.0340633	39	0.0359779	21	0.0707071	0	0	15	0.0252525	3	0.0164835	6	0.0102564	9	0.0172084	3	0.0461538	39	0.0761719	23	0.0447471	13	0.0349462	21	0.0371025	6	0.0123203	1	0.0114943	4	0.00683761	9	0.048913	23	0.0465587	5	0.0196078	17	0.0384615	11	0.025	5	0.033557	19	0.0380762	2
CD109	6	0.0689655	27	0.0656934	79	0.0728782	19	0.0639731	6	0.166667	42	0.0707071	17	0.0934066	7	0.0119658	46	0.0879541	3	0.0461538	8	0.015625	28	0.0544747	15	0.0403226	40	0.0706714	58	0.119097	3	0.0344828	26	0.0444444	11	0.0597826	16	0.0323887	6	0.0235294	21	0.0475113	29	0.0659091	0	0	17	0.0340681	7
CD151	1	0.0114943	15	0.0364964	38	0.0350554	13	0.043771	1	0.0277778	28	0.047138	7	0.0384615	5	0.00854701	19	0.0363289	8	0.123077	19	0.0371094	16	0.0311284	9	0.0241935	13	0.0229682	11	0.0225873	5	0.0574713	5	0.00854701	9	0.048913	27	0.0546559	10	0.0392157	1	0.00226244	19	0.0431818	6	0.0402685	22	0.0440882	4
CD34	4	0.045977	26	0.0632603	51	0.047048	7	0.023569	4	0.111111	18	0.030303	4	0.021978	9	0.0153846	22	0.042065	4	0.0615385	14	0.0273438	24	0.0466926	9	0.0241935	19	0.0335689	16	0.0328542	7	0.0804598	11	0.0188034	10	0.0543478	33	0.0668016	4	0.0156863	8	0.0180995	14	0.0318182	3	0.0201342	24	0.0480962	4
CD36	8	0.091954	11	0.026764	26	0.0239852	15	0.0505051	1	0.0277778	29	0.0488215	2	0.010989	10	0.017094	14	0.0267686	2	0.0307692	21	0.0410156	23	0.0447471	3	0.00806452	21	0.0371025	9	0.0184805	2	0.0229885	10	0.017094	4	0.0217391	19	0.0384615	3	0.0117647	9	0.020362	7	0.0159091	4	0.0268456	21	0.0420842	5
CD40LG	2	0.0229885	20	0.0486618	54	0.0498155	16	0.0538721	1	0.0277778	17	0.0286195	14	0.0769231	5	0.00854701	35	0.0669216	5	0.0769231	17	0.0332031	23	0.0447471	17	0.0456989	20	0.0353357	14	0.0287474	6	0.0689655	17	0.0290598	8	0.0434783	17	0.034413	11	0.0431373	15	0.0339367	30	0.0681818	3	0.0201342	19	0.0380762	5
CD44	5	0.0574713	16	0.0389294	54	0.0498155	17	0.0572391	2	0.0555556	27	0.0454545	6	0.032967	6	0.0102564	28	0.0535373	3	0.0461538	26	0.0507812	20	0.0389105	25	0.0672043	27	0.0477032	24	0.0492813	4	0.045977	14	0.0239316	8	0.0434783	16	0.0323887	22	0.0862745	20	0.0452489	20	0.0454545	9	0.0604027	24	0.0480962	1
CD9	10	0.114943	14	0.0340633	41	0.0378229	10	0.03367	0	0	28	0.047138	7	0.0384615	4	0.00683761	26	0.0497132	12	0.184615	26	0.0507812	23	0.0447471	13	0.0349462	17	0.0300353	22	0.0451745	6	0.0689655	9	0.0153846	6	0.0326087	21	0.0425101	9	0.0352941	32	0.0723982	19	0.0431818	7	0.0469799	17	0.0340681	8
CDKN1A	5	0.0574713	17	0.0413625	35	0.0322878	19	0.0639731	1	0.0277778	23	0.0387205	6	0.032967	8	0.0136752	19	0.0363289	1	0.0153846	23	0.0449219	11	0.0214008	24	0.0645161	12	0.0212014	13	0.026694	3	0.0344828	18	0.0307692	6	0.0326087	20	0.0404858	8	0.0313725	11	0.0248869	20	0.0454545	8	0.0536913	26	0.0521042	10
CEACAM1	1	0.0114943	25	0.0608273	32	0.0295203	10	0.03367	2	0.0555556	35	0.0589226	9	0.0494505	8	0.0136752	20	0.0382409	5	0.0769231	23	0.0449219	18	0.0350195	18	0.0483871	34	0.0600707	27	0.0554415	2	0.0229885	14	0.0239316	12	0.0652174	22	0.0445344	7	0.027451	19	0.0429864	27	0.0613636	13	0.0872483	26	0.0521042	1
CELA2A	1	0.0114943	11	0.026764	1	0.000922509	15	0.0505051	0	0	9	0.0151515	0	0	4	0.00683761	41	0.0783939	0	0	5	0.00976562	4	0.0077821	2	0.00537634	2	0.00353357	11	0.0225873	3	0.0344828	0	0	3	0.0163043	2	0.00404858	2	0.00784314	1	0.00226244	0	0	3	0.0201342	1	0.00200401	2
CELSR1	3	0.0344828	17	0.0413625	26	0.0239852	16	0.0538721	4	0.111111	19	0.0319865	17	0.0934066	4	0.00683761	40	0.0764818	3	0.0461538	24	0.046875	24	0.0466926	30	0.0806452	24	0.0424028	33	0.0677618	1	0.0114943	4	0.00683761	11	0.0597826	16	0.0323887	16	0.0627451	27	0.061086	23	0.0522727	8	0.0536913	13	0.0260521	7
CFH	4	0.045977	25	0.0608273	8	0.00738007	27	0.0909091	4	0.111111	27	0.0454545	12	0.0659341	12	0.0205128	24	0.0458891	5	0.0769231	19	0.0371094	3	0.00583658	48	0.129032	22	0.0388693	11	0.0225873	11	0.126437	13	0.0222222	6	0.0326087	21	0.0425101	6	0.0235294	9	0.020362	8	0.0181818	7	0.0469799	22	0.0440882	4
CFLAR	4	0.045977	15	0.0364964	56	0.0516605	11	0.037037	1	0.0277778	31	0.0521886	8	0.043956	7	0.0119658	21	0.040153	2	0.0307692	26	0.0507812	25	0.0486381	20	0.0537634	27	0.0477032	20	0.0410678	1	0.0114943	18	0.0307692	10	0.0543478	16	0.0323887	11	0.0431373	15	0.0339367	21	0.0477273	8	0.0536913	23	0.0460922	4
CLASP1	5	0.0574713	15	0.0364964	46	0.0424354	11	0.037037	3	0.0833333	31	0.0521886	22	0.120879	4	0.00683761	25	0.0478011	1	0.0153846	23	0.0449219	15	0.0291829	8	0.0215054	33	0.0583039	45	0.0924025	5	0.0574713	26	0.0444444	5	0.0271739	13	0.0263158	8	0.0313725	19	0.0429864	17	0.0386364	12	0.0805369	15	0.0300601	3
CLASP2	4	0.045977	37	0.0900243	41	0.0378229	14	0.047138	0	0	17	0.0286195	7	0.0384615	10	0.017094	5	0.00956023	2	0.0307692	4	0.0078125	10	0.0194553	16	0.0430108	19	0.0335689	9	0.0184805	5	0.0574713	16	0.0273504	4	0.0217391	20	0.0404858	9	0.0352941	19	0.0429864	14	0.0318182	4	0.0268456	12	0.0240481	4
CLDN1	9	0.103448	29	0.0705596	59	0.054428	43	0.144781	1	0.0277778	26	0.043771	16	0.0879121	8	0.0136752	64	0.122371	4	0.0615385	29	0.0566406	24	0.0466926	17	0.0456989	22	0.0388693	126	0.258727	2	0.0229885	10	0.017094	10	0.0543478	18	0.0364372	4	0.0156863	29	0.0656109	19	0.0431818	17	0.114094	15	0.0300601	7
CLDN19	1	0.0114943	14	0.0340633	51	0.047048	14	0.047138	1	0.0277778	32	0.0538721	9	0.0494505	15	0.025641	8	0.0152964	6	0.0923077	22	0.0429688	21	0.040856	26	0.0698925	31	0.0547703	14	0.0287474	1	0.0114943	19	0.0324786	12	0.0652174	21	0.0425101	1	0.00392157	6	0.0135747	41	0.0931818	15	0.100671	20	0.0400802	2
CLDN3	9	0.103448	26	0.0632603	84	0.0774908	11	0.037037	3	0.0833333	47	0.0791246	15	0.0824176	5	0.00854701	25	0.0478011	6	0.0923077	25	0.0488281	24	0.0466926	23	0.061828	58	0.102473	32	0.0657084	2	0.0229885	25	0.042735	11	0.0597826	27	0.0546559	4	0.0156863	18	0.040724	54	0.122727	10	0.0671141	19	0.0380762	7
CLDN4	7	0.0804598	7	0.0170316	31	0.0285978	2	0.00673401	2	0.0555556	4	0.00673401	5	0.0274725	6	0.0102564	18	0.0344168	4	0.0615385	18	0.0351562	1	0.00194553	8	0.0215054	4	0.00706714	9	0.0184805	3	0.0344828	12	0.0205128	4	0.0217391	23	0.0465587	1	0.00392157	7	0.0158371	9	0.0204545	9	0.0604027	13	0.0260521	6
CLEC10A	3	0.0344828	11	0.026764	30	0.0276753	4	0.013468	2	0.0555556	28	0.047138	3	0.0164835	5	0.00854701	22	0.042065	1	0.0153846	21	0.0410156	18	0.0350195	17	0.0456989	14	0.024735	15	0.0308008	3	0.0344828	7	0.0119658	5	0.0271739	21	0.0425101	9	0.0352941	14	0.0316742	11	0.025	4	0.0268456	21	0.0420842	4
CNN2	2	0.0229885	12	0.0291971	49	0.045203	15	0.0505051	2	0.0555556	28	0.047138	5	0.0274725	7	0.0119658	12	0.0229446	2	0.0307692	25	0.0488281	30	0.0583658	12	0.0322581	10	0.0176678	17	0.0349076	4	0.045977	7	0.0119658	4	0.0217391	17	0.034413	13	0.0509804	14	0.0316742	18	0.0409091	7	0.0469799	14	0.0280561	6
COL1A1	12	0.137931	9	0.0218978	48	0.0442804	10	0.03367	3	0.0833333	15	0.0252525	14	0.0769231	13	0.0222222	28	0.0535373	1	0.0153846	13	0.0253906	2	0.00389105	16	0.0430108	12	0.0212014	20	0.0410678	3	0.0344828	14	0.0239316	8	0.0434783	34	0.0688259	7	0.027451	3	0.00678733	14	0.0318182	6	0.0402685	12	0.0240481	1
COL3A1	2	0.0229885	7	0.0170316	40	0.0369004	12	0.040404	1	0.0277778	17	0.0286195	11	0.0604396	6	0.0102564	24	0.0458891	1	0.0153846	35	0.0683594	3	0.00583658	9	0.0241935	16	0.0282686	24	0.0492813	3	0.0344828	19	0.0324786	9	0.048913	33	0.0668016	9	0.0352941	13	0.0294118	11	0.025	8	0.0536913	15	0.0300601	2
COL5A1	8	0.091954	12	0.0291971	36	0.0332103	16	0.0538721	1	0.0277778	38	0.0639731	22	0.120879	6	0.0102564	16	0.0305927	5	0.0769231	24	0.046875	11	0.0214008	17	0.0456989	27	0.0477032	20	0.0410678	3	0.0344828	14	0.0239316	13	0.0706522	30	0.0607287	12	0.0470588	11	0.0248869	14	0.0318182	10	0.0671141	16	0.0320641	2
COMP	2	0.0229885	4	0.00973236	36	0.0332103	15	0.0505051	2	0.0555556	19	0.0319865	7	0.0384615	6	0.0102564	16	0.0305927	1	0.0153846	19	0.0371094	7	0.0136187	18	0.0483871	30	0.0530035	21	0.0431211	6	0.0689655	10	0.017094	6	0.0326087	18	0.0364372	4	0.0156863	11	0.0248869	10	0.0227273	9	0.0604027	11	0.0220441	6
CORO1B	4	0.045977	25	0.0608273	96	0.0885609	17	0.0572391	3	0.0833333	27	0.0454545	18	0.0989011	4	0.00683761	65	0.124283	4	0.0615385	23	0.0449219	25	0.0486381	27	0.0725806	35	0.0618375	30	0.0616016	6	0.0689655	17	0.0290598	7	0.0380435	29	0.0587045	17	0.0666667	29	0.0656109	34	0.0772727	5	0.033557	22	0.0440882	4
CPB2	8	0.091954	13	0.0316302	4	0.00369004	9	0.030303	1	0.0277778	34	0.0572391	9	0.0494505	7	0.0119658	10	0.0191205	1	0.0153846	3	0.00585938	1	0.00194553	10	0.0268817	7	0.0123675	6	0.0123203	1	0.0114943	16	0.0273504	1	0.00543478	3	0.00607287	1	0.00392157	1	0.00226244	24	0.0545455	7	0.0469799	4	0.00801603	4
CRK	3	0.0344828	11	0.026764	24	0.0221402	9	0.030303	1	0.0277778	14	0.023569	8	0.043956	2	0.0034188	8	0.0152964	0	0	12	0.0234375	15	0.0291829	9	0.0241935	12	0.0212014	11	0.0225873	4	0.045977	19	0.0324786	3	0.0163043	13	0.0263158	14	0.054902	11	0.0248869	13	0.0295455	5	0.033557	10	0.0200401	3
CRP	3	0.0344828	3	0.00729927	31	0.0285978	9	0.030303	1	0.0277778	2	0.003367	2	0.010989	10	0.017094	3	0.00573614	1	0.0153846	7	0.0136719	2	0.00389105	14	0.0376344	3	0.00530035	10	0.0205339	4	0.045977	7	0.0119658	10	0.0543478	9	0.0182186	6	0.0235294	5	0.0113122	2	0.00454545	6	0.0402685	5	0.01002	5
CX3CL1	5	0.0574713	13	0.0316302	21	0.0193727	14	0.047138	2	0.0555556	18	0.030303	7	0.0384615	2	0.0034188	27	0.0516252	15	0.230769	15	0.0292969	16	0.0311284	14	0.0376344	29	0.0512367	25	0.0513347	2	0.0229885	6	0.0102564	6	0.0326087	18	0.0364372	5	0.0196078	17	0.0384615	10	0.0227273	6	0.0402685	23	0.0460922	8
CXADR	4	0.045977	36	0.0875912	80	0.0738007	17	0.0572391	1	0.0277778	30	0.0505051	5	0.0274725	12	0.0205128	17	0.0325048	2	0.0307692	24	0.046875	25	0.0486381	19	0.0510753	28	0.04947	13	0.026694	4	0.045977	17	0.0290598	6	0.0326087	23	0.0465587	12	0.0470588	38	0.0859729	13	0.0295455	17	0.114094	20	0.0400802	11
CXCR4	6	0.0689655	9	0.0218978	36	0.0332103	9	0.030303	1	0.0277778	29	0.0488215	3	0.0164835	7	0.0119658	20	0.0382409	2	0.0307692	26	0.0507812	32	0.0622568	17	0.0456989	13	0.0229682	14	0.0287474	2	0.0229885	17	0.0290598	5	0.0271739	17	0.034413	11	0.0431373	9	0.020362	14	0.0318182	9	0.0604027	20	0.0400802	4
DCBLD2	5	0.0574713	12	0.0291971	25	0.0230627	9	0.030303	1	0.0277778	7	0.0117845	21	0.115385	5	0.00854701	25	0.0478011	2	0.0307692	12	0.0234375	16	0.0311284	10	0.0268817	25	0.0441696	10	0.0205339	4	0.045977	18	0.0307692	15	0.0815217	14	0.0283401	12	0.0470588	16	0.0361991	12	0.0272727	13	0.0872483	17	0.0340681	8
DDR1	5	0.0574713	15	0.0364964	48	0.0442804	20	0.0673401	1	0.0277778	28	0.047138	17	0.0934066	5	0.00854701	30	0.0573614	17	0.261538	24	0.046875	16	0.0311284	14	0.0376344	48	0.0848057	14	0.0287474	5	0.0574713	18	0.0307692	7	0.0380435	14	0.0283401	6	0.0235294	48	0.108597	28	0.0636364	13	0.0872483	9	0.0180361	6
DMTN	13	0.149425	10	0.0243309	35	0.0322878	10	0.03367	1	0.0277778	21	0.0353535	4	0.021978	7	0.0119658	18	0.0344168	3	0.0461538	19	0.0371094	31	0.0603113	8	0.0215054	22	0.0388693	12	0.0246407	4	0.045977	5	0.00854701	4	0.0217391	11	0.0222672	12	0.0470588	12	0.0271493	23	0.0522727	3	0.0201342	19	0.0380762	7
DRD5	2	0.0229885	10	0.0243309	52	0.0479705	3	0.010101	3	0.0833333	21	0.0353535	1	0.00549451	5	0.00854701	13	0.0248566	7	0.107692	24	0.046875	17	0.0330739	6	0.016129	21	0.0371025	6	0.0123203	2	0.0229885	17	0.0290598	1	0.00543478	17	0.034413	1	0.00392157	14	0.0316742	13	0.0295455	5	0.033557	19	0.0380762	1
DSP	2	0.0229885	17	0.0413625	39	0.0359779	15	0.0505051	1	0.0277778	32	0.0538721	5	0.0274725	3	0.00512821	27	0.0516252	4	0.0615385	25	0.0488281	7	0.0136187	48	0.129032	46	0.0812721	18	0.036961	5	0.0574713	56	0.0957265	9	0.048913	16	0.0323887	5	0.0196078	41	0.0927602	15	0.0340909	6	0.0402685	22	0.0440882	7
DST	4	0.045977	26	0.0632603	35	0.0322878	22	0.0740741	2	0.0555556	34	0.0572391	4	0.021978	4	0.00683761	36	0.0688337	0	0	25	0.0488281	16	0.0311284	26	0.0698925	18	0.0318021	33	0.0677618	5	0.0574713	11	0.0188034	7	0.0380435	16	0.0323887	6	0.0235294	34	0.0769231	18	0.0409091	9	0.0604027	18	0.0360721	6
DTNBP1	5	0.0574713	31	0.0754258	94	0.0867159	22	0.0740741	3	0.0833333	39	0.0656566	10	0.0549451	7	0.0119658	28	0.0535373	1	0.0153846	16	0.03125	23	0.0447471	37	0.0994624	47	0.0830389	31	0.063655	2	0.0229885	50	0.0854701	7	0.0380435	15	0.0303644	13	0.0509804	43	0.0972851	17	0.0386364	8	0.0536913	22	0.0440882	3
DUOX1	3	0.0344828	12	0.0291971	39	0.0359779	12	0.040404	4	0.111111	21	0.0353535	4	0.021978	9	0.0153846	19	0.0363289	7	0.107692	12	0.0234375	11	0.0214008	17	0.0456989	13	0.0229682	13	0.026694	2	0.0229885	7	0.0119658	7	0.0380435	22	0.0445344	15	0.0588235	32	0.0723982	10	0.0227273	3	0.0201342	24	0.0480962	10
DUOX2	1	0.0114943	13	0.0316302	34	0.0313653	9	0.030303	1	0.0277778	26	0.043771	10	0.0549451	9	0.0153846	19	0.0363289	2	0.0307692	8	0.015625	4	0.0077821	9	0.0241935	7	0.0123675	5	0.0102669	6	0.0689655	4	0.00683761	10	0.0543478	12	0.0242915	6	0.0235294	1	0.00226244	24	0.0545455	6	0.0402685	27	0.0541082	7
DUSP10	2	0.0229885	24	0.0583942	78	0.0719557	23	0.0774411	1	0.0277778	44	0.0740741	9	0.0494505	6	0.0102564	34	0.0650096	8	0.123077	27	0.0527344	29	0.0564202	20	0.0537634	47	0.0830389	17	0.0349076	4	0.045977	11	0.0188034	20	0.108696	28	0.0566802	5	0.0196078	36	0.081448	10	0.0227273	3	0.0201342	17	0.0340681	9
DYSF	2	0.0229885	19	0.0462287	61	0.0562731	21	0.0707071	2	0.0555556	18	0.030303	4	0.021978	3	0.00512821	10	0.0191205	1	0.0153846	19	0.0371094	23	0.0447471	19	0.0510753	21	0.0371025	24	0.0492813	3	0.0344828	15	0.025641	5	0.0271739	22	0.0445344	3	0.0117647	13	0.0294118	22	0.05	14	0.0939597	13	0.0260521	4
EGFR	5	0.0574713	58	0.141119	49	0.045203	22	0.0740741	1	0.0277778	69	0.116162	30	0.164835	75	0.128205	78	0.14914	1	0.0153846	25	0.0488281	63	0.122568	22	0.0591398	82	0.144876	36	0.073922	6	0.0689655	10	0.017094	5	0.0271739	25	0.0506073	15	0.0588235	22	0.0497738	44	0.1	9	0.0604027	23	0.0460922	5
ELK3	5	0.0574713	17	0.0413625	31	0.0285978	13	0.043771	2	0.0555556	30	0.0505051	3	0.0164835	9	0.0153846	20	0.0382409	3	0.0461538	21	0.0410156	20	0.0389105	10	0.0268817	17	0.0300353	16	0.0328542	5	0.0574713	3	0.00512821	6	0.0326087	15	0.0303644	28	0.109804	9	0.020362	15	0.0340909	14	0.0939597	14	0.0280561	5
ENG	4	0.045977	14	0.0340633	33	0.0304428	15	0.0505051	1	0.0277778	36	0.0606061	9	0.0494505	8	0.0136752	21	0.040153	5	0.0769231	13	0.0253906	16	0.0311284	16	0.0430108	19	0.0335689	8	0.0164271	4	0.045977	7	0.0119658	5	0.0271739	27	0.0546559	14	0.054902	16	0.0361991	19	0.0431818	8	0.0536913	25	0.0501002	5
ENPP4	5	0.0574713	19	0.0462287	43	0.0396679	15	0.0505051	2	0.0555556	37	0.0622896	13	0.0714286	9	0.0153846	25	0.0478011	1	0.0153846	18	0.0351562	16	0.0311284	32	0.0860215	37	0.065371	16	0.0328542	4	0.045977	12	0.0205128	4	0.0217391	27	0.0546559	5	0.0196078	24	0.0542986	36	0.0818182	11	0.0738255	15	0.0300601	5
ENTPD1	9	0.103448	11	0.026764	39	0.0359779	11	0.037037	2	0.0555556	28	0.047138	8	0.043956	2	0.0034188	18	0.0344168	3	0.0461538	20	0.0390625	18	0.0350195	15	0.0403226	22	0.0388693	13	0.026694	3	0.0344828	9	0.0153846	5	0.0271739	24	0.048583	9	0.0352941	4	0.00904977	16	0.0363636	5	0.033557	19	0.0380762	3
ENTPD2	1	0.0114943	11	0.026764	51	0.047048	9	0.030303	2	0.0555556	35	0.0589226	14	0.0769231	3	0.00512821	12	0.0229446	2	0.0307692	20	0.0390625	21	0.040856	14	0.0376344	14	0.024735	13	0.026694	5	0.0574713	4	0.00683761	7	0.0380435	20	0.0404858	8	0.0313725	1	0.00226244	7	0.0159091	5	0.033557	20	0.0400802	8
EPB41L4B	2	0.0229885	22	0.053528	51	0.047048	12	0.040404	1	0.0277778	27	0.0454545	10	0.0549451	9	0.0153846	42	0.0803059	2	0.0307692	15	0.0292969	31	0.0603113	13	0.0349462	16	0.0282686	10	0.0205339	5	0.0574713	10	0.017094	8	0.0434783	34	0.0688259	15	0.0588235	17	0.0384615	10	0.0227273	8	0.0536913	22	0.0440882	6
EPHB2	1	0.0114943	23	0.0559611	40	0.0369004	8	0.026936	0	0	13	0.0218855	8	0.043956	7	0.0119658	14	0.0267686	2	0.0307692	11	0.0214844	24	0.0466926	16	0.0430108	19	0.0335689	13	0.026694	3	0.0344828	16	0.0273504	9	0.048913	11	0.0222672	21	0.0823529	12	0.0271493	17	0.0386364	9	0.0604027	23	0.0460922	3
EPPK1	1	0.0114943	28	0.0681265	144	0.132841	24	0.0808081	9	0.25	50	0.0841751	19	0.104396	4	0.00683761	45	0.0860421	6	0.0923077	30	0.0585938	30	0.0583658	29	0.077957	52	0.0918728	38	0.0780287	6	0.0689655	55	0.0940171	9	0.048913	38	0.0769231	9	0.0352941	33	0.0746606	47	0.106818	13	0.0872483	18	0.0360721	9
ERBB2	5	0.0574713	47	0.114355	168	0.154982	34	0.114478	0	0	46	0.0774411	31	0.17033	6	0.0102564	30	0.0573614	1	0.0153846	23	0.0449219	29	0.0564202	23	0.061828	55	0.0971731	38	0.0780287	5	0.0574713	16	0.0273504	13	0.0706522	18	0.0364372	13	0.0509804	25	0.0565611	79	0.179545	11	0.0738255	18	0.0360721	9
EVL	3	0.0344828	17	0.0413625	42	0.0387454	12	0.040404	1	0.0277778	20	0.03367	2	0.010989	7	0.0119658	20	0.0382409	10	0.153846	11	0.0214844	10	0.0194553	14	0.0376344	18	0.0318021	4	0.00821355	2	0.0229885	13	0.0222222	7	0.0380435	22	0.0445344	13	0.0509804	11	0.0248869	10	0.0227273	7	0.0469799	14	0.0280561	1
EVPL	2	0.0229885	28	0.0681265	42	0.0387454	23	0.0774411	1	0.0277778	42	0.0707071	3	0.0164835	10	0.017094	20	0.0382409	0	0	27	0.0527344	19	0.036965	24	0.0645161	53	0.0936396	25	0.0513347	11	0.126437	28	0.0478632	9	0.048913	22	0.0445344	5	0.0196078	25	0.0565611	5	0.0113636	10	0.0671141	19	0.0380762	7
EXT1	5	0.0574713	24	0.0583942	121	0.111624	24	0.0808081	7	0.194444	71	0.119529	52	0.285714	11	0.0188034	132	0.25239	10	0.153846	25	0.0488281	40	0.077821	66	0.177419	54	0.0954064	76	0.156057	5	0.0574713	84	0.14359	16	0.0869565	32	0.0647773	14	0.054902	46	0.104072	46	0.104545	3	0.0201342	16	0.0320641	6
F10	5	0.0574713	6	0.0145985	7	0.00645756	3	0.010101	1	0.0277778	11	0.0185185	6	0.032967	7	0.0119658	9	0.0172084	2	0.0307692	3	0.00585938	3	0.00583658	14	0.0376344	3	0.00530035	9	0.0184805	1	0.0114943	1	0.0017094	8	0.0434783	10	0.0202429	6	0.0235294	7	0.0158371	7	0.0159091	3	0.0201342	4	0.00801603	4
F11	1	0.0114943	17	0.0413625	34	0.0313653	14	0.047138	1	0.0277778	31	0.0521886	7	0.0384615	5	0.00854701	21	0.040153	3	0.0461538	25	0.0488281	19	0.036965	14	0.0376344	24	0.0424028	14	0.0287474	6	0.0689655	9	0.0153846	7	0.0380435	28	0.0566802	11	0.0431373	15	0.0339367	15	0.0340909	5	0.033557	23	0.0460922	7
F11R	6	0.0689655	8	0.0194647	39	0.0359779	7	0.023569	2	0.0555556	19	0.0319865	3	0.0164835	8	0.0136752	11	0.0210325	1	0.0153846	38	0.0742188	11	0.0214008	20	0.0537634	14	0.024735	9	0.0184805	3	0.0344828	5	0.00854701	6	0.0326087	25	0.0506073	18	0.0705882	2	0.00452489	13	0.0295455	5	0.033557	15	0.0300601	6
F12	4	0.045977	4	0.00973236	46	0.0424354	5	0.016835	4	0.111111	34	0.0572391	8	0.043956	3	0.00512821	30	0.0573614	1	0.0153846	17	0.0332031	10	0.0194553	10	0.0268817	11	0.0194346	17	0.0349076	4	0.045977	12	0.0205128	6	0.0326087	27	0.0546559	10	0.0392157	15	0.0339367	21	0.0477273	6	0.0402685	17	0.0340681	2
F13A1	7	0.0804598	16	0.0389294	42	0.0387454	18	0.0606061	1	0.0277778	26	0.043771	8	0.043956	6	0.0102564	21	0.040153	2	0.0307692	21	0.0410156	11	0.0214008	8	0.0215054	21	0.0371025	15	0.0308008	3	0.0344828	36	0.0615385	5	0.0271739	19	0.0384615	9	0.0352941	15	0.0339367	19	0.0431818	12	0.0805369	20	0.0400802	2
F13B	5	0.0574713	27	0.0656934	17	0.0156827	14	0.047138	1	0.0277778	15	0.0252525	7	0.0384615	10	0.017094	24	0.0458891	3	0.0461538	13	0.0253906	15	0.0291829	11	0.0295699	20	0.0353357	11	0.0225873	2	0.0229885	8	0.0136752	5	0.0271739	17	0.034413	4	0.0156863	30	0.0678733	10	0.0227273	7	0.0469799	21	0.0420842	5
F2	1	0.0114943	15	0.0364964	24	0.0221402	10	0.03367	6	0.166667	28	0.047138	6	0.032967	7	0.0119658	28	0.0535373	7	0.107692	18	0.0351562	18	0.0350195	77	0.206989	13	0.0229682	10	0.0205339	8	0.091954	9	0.0153846	14	0.076087	25	0.0506073	6	0.0235294	11	0.0248869	24	0.0545455	14	0.0939597	7	0.0140281	5
F2R	6	0.0689655	4	0.00973236	40	0.0369004	11	0.037037	1	0.0277778	10	0.016835	8	0.043956	5	0.00854701	23	0.0439771	2	0.0307692	15	0.0292969	19	0.036965	20	0.0537634	30	0.0530035	17	0.0349076	7	0.0804598	18	0.0307692	8	0.0434783	11	0.0222672	7	0.027451	10	0.0226244	37	0.0840909	6	0.0402685	13	0.0260521	6
F2RL1	3	0.0344828	21	0.0510949	44	0.0405904	26	0.0875421	1	0.0277778	29	0.0488215	6	0.032967	6	0.0102564	38	0.0726577	1	0.0153846	21	0.0410156	14	0.0272374	31	0.0833333	19	0.0335689	17	0.0349076	4	0.045977	19	0.0324786	2	0.0108696	20	0.0404858	11	0.0431373	22	0.0497738	20	0.0454545	4	0.0268456	26	0.0521042	8
F2RL2	1	0.0114943	5	0.0121655	11	0.0101476	7	0.023569	3	0.0833333	6	0.010101	0	0	5	0.00854701	7	0.0133843	0	0	2	0.00390625	8	0.0155642	24	0.0645161	12	0.0212014	6	0.0123203	0	0	0	0	9	0.048913	11	0.0222672	1	0.00392157	8	0.0180995	0	0	3	0.0201342	6	0.012024	3
F2RL3	1	0.0114943	3	0.00729927	37	0.0341328	12	0.040404	1	0.0277778	48	0.0808081	19	0.104396	6	0.0102564	14	0.0267686	3	0.0461538	13	0.0253906	16	0.0311284	16	0.0430108	14	0.024735	20	0.0410678	5	0.0574713	12	0.0205128	4	0.0217391	15	0.0303644	9	0.0352941	6	0.0135747	35	0.0795455	6	0.0402685	24	0.0480962	3
F3	5	0.0574713	15	0.0364964	27	0.0249077	1	0.003367	2	0.0555556	11	0.0185185	6	0.032967	11	0.0188034	24	0.0458891	3	0.0461538	3	0.00585938	6	0.0116732	6	0.016129	17	0.0300353	7	0.0143737	1	0.0114943	8	0.0136752	6	0.0326087	30	0.0607287	8	0.0313725	13	0.0294118	12	0.0272727	9	0.0604027	5	0.01002	6
F5	3	0.0344828	83	0.201946	273	0.251845	38	0.127946	7	0.194444	52	0.0875421	30	0.164835	6	0.0102564	54	0.10325	0	0	20	0.0390625	33	0.0642023	88	0.236559	72	0.127208	60	0.123203	6	0.0689655	38	0.0649573	20	0.108696	16	0.0323887	15	0.0588235	45	0.10181	47	0.106818	17	0.114094	23	0.0460922	18
F7	3	0.0344828	9	0.0218978	51	0.047048	12	0.040404	3	0.0833333	27	0.0454545	9	0.0494505	8	0.0136752	13	0.0248566	2	0.0307692	2	0.00390625	18	0.0350195	33	0.0887097	27	0.0477032	11	0.0225873	4	0.045977	12	0.0205128	11	0.0597826	19	0.0384615	10	0.0392157	23	0.0520362	17	0.0386364	2	0.0134228	29	0.0581162	8
F8	11	0.126437	6	0.0145985	48	0.0442804	16	0.0538721	2	0.0555556	24	0.040404	5	0.0274725	5	0.00854701	20	0.0382409	3	0.0461538	18	0.0351562	7	0.0136187	13	0.0349462	14	0.024735	19	0.0390144	2	0.0229885	7	0.0119658	9	0.048913	29	0.0587045	8	0.0313725	15	0.0339367	9	0.0204545	5	0.033557	22	0.0440882	3
F9	0	0	19	0.0462287	100	0.0922509	6	0.020202	3	0.0833333	12	0.020202	0	0	6	0.0102564	13	0.0248566	0	0	18	0.0351562	15	0.0291829	42	0.112903	13	0.0229682	13	0.026694	3	0.0344828	0	0	8	0.0434783	14	0.0283401	17	0.0666667	10	0.0226244	0	0	1	0.00671141	1	0.00200401	3
FBLN1	4	0.045977	16	0.0389294	38	0.0350554	3	0.010101	1	0.0277778	29	0.0488215	4	0.021978	9	0.0153846	31	0.0592734	2	0.0307692	8	0.015625	21	0.040856	17	0.0456989	5	0.00883392	28	0.0574949	12	0.137931	13	0.0222222	8	0.0434783	11	0.0222672	11	0.0431373	9	0.020362	16	0.0363636	9	0.0604027	22	0.0440882	2
FCER1G	3	0.0344828	14	0.0340633	36	0.0332103	21	0.0707071	1	0.0277778	25	0.0420875	6	0.032967	8	0.0136752	19	0.0363289	1	0.0153846	24	0.046875	27	0.0525292	18	0.0483871	7	0.0123675	11	0.0225873	3	0.0344828	10	0.017094	4	0.0217391	22	0.0445344	10	0.0392157	10	0.0226244	15	0.0340909	6	0.0402685	22	0.0440882	11
FER1L5	1	0.0114943	14	0.0340633	43	0.0396679	9	0.030303	1	0.0277778	16	0.026936	11	0.0604396	4	0.00683761	20	0.0382409	2	0.0307692	7	0.0136719	29	0.0564202	3	0.00806452	18	0.0318021	19	0.0390144	3	0.0344828	10	0.017094	7	0.0380435	16	0.0323887	5	0.0196078	14	0.0316742	1	0.00227273	3	0.0201342	20	0.0400802	6
FERMT1	19	0.218391	30	0.0729927	56	0.0516605	21	0.0707071	2	0.0555556	98	0.164983	19	0.104396	11	0.0188034	51	0.0975143	10	0.153846	36	0.0703125	16	0.0311284	16	0.0430108	32	0.0565371	59	0.12115	5	0.0574713	11	0.0188034	10	0.0543478	16	0.0323887	9	0.0352941	21	0.0475113	20	0.0454545	7	0.0469799	22	0.0440882	10
FERMT2	6	0.0689655	12	0.0291971	50	0.0461255	19	0.0639731	1	0.0277778	20	0.03367	13	0.0714286	4	0.00683761	34	0.0650096	3	0.0461538	4	0.0078125	19	0.036965	11	0.0295699	32	0.0565371	20	0.0410678	3	0.0344828	13	0.0222222	7	0.0380435	17	0.034413	17	0.0666667	17	0.0384615	15	0.0340909	4	0.0268456	17	0.0340681	8
FERMT3	4	0.045977	7	0.0170316	45	0.0415129	13	0.043771	1	0.0277778	24	0.040404	6	0.032967	6	0.0102564	21	0.040153	2	0.0307692	20	0.0390625	24	0.0466926	19	0.0510753	21	0.0371025	10	0.0205339	5	0.0574713	13	0.0222222	11	0.0597826	16	0.0323887	11	0.0431373	16	0.0361991	9	0.0204545	4	0.0268456	19	0.0380762	1
FGA	2	0.0229885	8	0.0194647	3	0.00276753	6	0.020202	7	0.194444	15	0.0252525	6	0.032967	3	0.00512821	10	0.0191205	1	0.0153846	11	0.0214844	3	0.00583658	10	0.0268817	20	0.0353357	6	0.0123203	1	0.0114943	21	0.0358974	7	0.0380435	10	0.0202429	4	0.0156863	11	0.0248869	1	0.00227273	4	0.0268456	6	0.012024	2
FGB	1	0.0114943	14	0.0340633	5	0.00461255	3	0.010101	7	0.194444	14	0.023569	5	0.0274725	3	0.00512821	7	0.0133843	5	0.0769231	7	0.0136719	4	0.0077821	12	0.0322581	17	0.0300353	2	0.00410678	1	0.0114943	7	0.0119658	6	0.0326087	1	0.00202429	6	0.0235294	6	0.0135747	2	0.00454545	1	0.00671141	5	0.01002	1
FGF1	6	0.0689655	7	0.0170316	32	0.0295203	14	0.047138	1	0.0277778	28	0.047138	10	0.0549451	8	0.0136752	20	0.0382409	3	0.0461538	4	0.0078125	25	0.0486381	6	0.016129	26	0.0459364	13	0.026694	3	0.0344828	20	0.034188	3	0.0163043	22	0.0445344	4	0.0156863	11	0.0248869	5	0.0113636	1	0.00671141	26	0.0521042	5
FGF10	6	0.0689655	16	0.0389294	24	0.0221402	8	0.026936	3	0.0833333	22	0.037037	8	0.043956	4	0.00683761	32	0.0611855	4	0.0615385	10	0.0195312	14	0.0272374	14	0.0376344	22	0.0388693	14	0.0287474	4	0.045977	6	0.0102564	9	0.048913	19	0.0384615	14	0.054902	10	0.0226244	17	0.0386364	12	0.0805369	22	0.0440882	7
FGF2	4	0.045977	11	0.026764	34	0.0313653	11	0.037037	3	0.0833333	30	0.0505051	10	0.0549451	2	0.0034188	20	0.0382409	3	0.0461538	21	0.0410156	2	0.00389105	9	0.0241935	11	0.0194346	17	0.0349076	4	0.045977	10	0.017094	7	0.0380435	15	0.0303644	10	0.0392157	14	0.0316742	15	0.0340909	3	0.0201342	17	0.0340681	4
FGF7	4	0.045977	14	0.0340633	33	0.0304428	4	0.013468	1	0.0277778	29	0.0488215	3	0.0164835	4	0.00683761	17	0.0325048	2	0.0307692	16	0.03125	10	0.0194553	4	0.0107527	3	0.00530035	36	0.073922	6	0.0689655	8	0.0136752	6	0.0326087	21	0.0425101	15	0.0588235	15	0.0339367	11	0.025	2	0.0134228	4	0.00801603	8
FGFR1OP2	22	0.252874	36	0.0875912	91	0.0839483	15	0.0505051	1	0.0277778	35	0.0589226	31	0.17033	11	0.0188034	55	0.105163	2	0.0307692	20	0.0390625	26	0.0505837	17	0.0456989	44	0.0777385	68	0.13963	9	0.103448	55	0.0940171	12	0.0652174	15	0.0303644	22	0.0862745	22	0.0497738	41	0.0931818	0	0	9	0.0180361	2
FGG	2	0.0229885	5	0.0121655	10	0.00922509	3	0.010101	4	0.111111	6	0.010101	8	0.043956	2	0.0034188	10	0.0191205	2	0.0307692	13	0.0253906	4	0.0077821	12	0.0322581	12	0.0212014	3	0.00616016	1	0.0114943	27	0.0461538	3	0.0163043	13	0.0263158	2	0.00784314	10	0.0226244	3	0.00681818	3	0.0201342	5	0.01002	3
FKBP10	5	0.0574713	16	0.0389294	44	0.0405904	21	0.0707071	3	0.0833333	21	0.0353535	17	0.0934066	11	0.0188034	36	0.0688337	2	0.0307692	22	0.0429688	30	0.0583658	24	0.0645161	26	0.0459364	26	0.0533881	4	0.045977	3	0.00512821	10	0.0543478	19	0.0384615	9	0.0352941	25	0.0565611	28	0.0636364	6	0.0402685	19	0.0380762	9
FLNA	7	0.0804598	12	0.0291971	55	0.050738	16	0.0538721	0	0	27	0.0454545	6	0.032967	5	0.00854701	41	0.0783939	2	0.0307692	21	0.0410156	22	0.0428016	11	0.0295699	32	0.0565371	27	0.0554415	2	0.0229885	27	0.0461538	4	0.0217391	23	0.0465587	17	0.0666667	9	0.020362	17	0.0386364	7	0.0469799	17	0.0340681	9
FN1	1	0.0114943	18	0.0437956	64	0.0590406	16	0.0538721	3	0.0833333	25	0.0420875	3	0.0164835	4	0.00683761	10	0.0191205	3	0.0461538	25	0.0488281	8	0.0155642	18	0.0483871	17	0.0300353	16	0.0328542	5	0.0574713	16	0.0273504	8	0.0434783	3	0.00607287	10	0.0392157	13	0.0294118	17	0.0386364	6	0.0402685	24	0.0480962	3
FNTB	3	0.0344828	15	0.0364964	64	0.0590406	27	0.0909091	1	0.0277778	13	0.0218855	21	0.115385	10	0.017094	40	0.0764818	1	0.0153846	14	0.0273438	20	0.0389105	19	0.0510753	40	0.0706714	29	0.0595483	1	0.0114943	15	0.025641	14	0.076087	13	0.0263158	2	0.00784314	19	0.0429864	19	0.0431818	9	0.0604027	17	0.0340681	10
FOXA2	3	0.0344828	6	0.0145985	4	0.00369004	11	0.037037	0	0	21	0.0353535	25	0.137363	6	0.0102564	7	0.0133843	7	0.107692	14	0.0273438	5	0.00972763	16	0.0430108	28	0.04947	14	0.0287474	1	0.0114943	12	0.0205128	15	0.0815217	16	0.0323887	5	0.0196078	5	0.0113122	39	0.0886364	8	0.0536913	27	0.0541082	3
FOXC2	2	0.0229885	15	0.0364964	34	0.0313653	12	0.040404	1	0.0277778	21	0.0353535	6	0.032967	9	0.0153846	16	0.0305927	1	0.0153846	10	0.0195312	6	0.0116732	2	0.00537634	10	0.0176678	18	0.036961	4	0.045977	18	0.0307692	15	0.0815217	20	0.0404858	4	0.0156863	5	0.0113122	3	0.00681818	10	0.0671141	28	0.0561122	2
FZD6	7	0.0804598	48	0.116788	195	0.179889	32	0.107744	5	0.138889	51	0.0858586	15	0.0824176	11	0.0188034	54	0.10325	6	0.0923077	33	0.0644531	27	0.0525292	40	0.107527	74	0.130742	43	0.0882957	3	0.0344828	43	0.0735043	25	0.13587	43	0.0870445	21	0.0823529	37	0.0837104	47	0.106818	14	0.0939597	13	0.0260521	3
FZD7	1	0.0114943	14	0.0340633	45	0.0415129	8	0.026936	2	0.0555556	23	0.0387205	22	0.120879	6	0.0102564	38	0.0726577	1	0.0153846	8	0.015625	19	0.036965	12	0.0322581	26	0.0459364	36	0.073922	3	0.0344828	16	0.0273504	6	0.0326087	13	0.0263158	10	0.0392157	25	0.0565611	17	0.0386364	6	0.0402685	18	0.0360721	5
GAS6	2	0.0229885	8	0.0194647	27	0.0249077	14	0.047138	0	0	67	0.112795	11	0.0604396	7	0.0119658	17	0.0325048	3	0.0461538	18	0.0351562	28	0.0544747	10	0.0268817	18	0.0318021	19	0.0390144	3	0.0344828	12	0.0205128	6	0.0326087	19	0.0384615	10	0.0392157	22	0.0497738	21	0.0477273	6	0.0402685	20	0.0400802	5
GATA1	7	0.0804598	11	0.026764	37	0.0341328	2	0.00673401	1	0.0277778	24	0.040404	5	0.0274725	4	0.00683761	23	0.0439771	1	0.0153846	13	0.0253906	1	0.00194553	3	0.00806452	24	0.0424028	10	0.0205339	1	0.0114943	20	0.034188	7	0.0380435	11	0.0222672	1	0.00392157	24	0.0542986	14	0.0318182	8	0.0536913	28	0.0561122	2
GATA2	4	0.045977	25	0.0608273	27	0.0249077	5	0.016835	1	0.0277778	26	0.043771	13	0.0714286	10	0.017094	41	0.0783939	3	0.0461538	10	0.0195312	19	0.036965	11	0.0295699	19	0.0335689	18	0.036961	3	0.0344828	23	0.0393162	9	0.048913	31	0.062753	1	0.00392157	22	0.0497738	20	0.0454545	7	0.0469799	12	0.0240481	2
GATA4	7	0.0804598	16	0.0389294	26	0.0239852	5	0.016835	1	0.0277778	35	0.0589226	20	0.10989	8	0.0136752	26	0.0497132	4	0.0615385	8	0.015625	1	0.00194553	6	0.016129	15	0.0265018	24	0.0492813	6	0.0689655	3	0.00512821	9	0.048913	25	0.0506073	1	0.00392157	29	0.0656109	40	0.0909091	9	0.0604027	4	0.00801603	4
GJA1	4	0.045977	19	0.0462287	33	0.0304428	11	0.037037	0	0	14	0.023569	6	0.032967	5	0.00854701	27	0.0516252	3	0.0461538	20	0.0390625	23	0.0447471	6	0.016129	19	0.0335689	19	0.0390144	5	0.0574713	7	0.0119658	10	0.0543478	14	0.0283401	12	0.0470588	23	0.0520362	16	0.0363636	7	0.0469799	25	0.0501002	5
GNA13	7	0.0804598	27	0.0656934	159	0.146679	27	0.0909091	2	0.0555556	23	0.0387205	17	0.0934066	7	0.0119658	31	0.0592734	0	0	16	0.03125	21	0.040856	35	0.094086	42	0.0742049	63	0.129363	6	0.0689655	14	0.0239316	8	0.0434783	24	0.048583	13	0.0509804	30	0.0678733	7	0.0159091	4	0.0268456	13	0.0260521	5
GNAS	9	0.103448	30	0.0729927	79	0.0728782	18	0.0606061	0	0	174	0.292929	21	0.115385	18	0.0307692	45	0.0860421	3	0.0461538	42	0.0820312	28	0.0544747	31	0.0833333	61	0.107774	50	0.102669	6	0.0689655	70	0.119658	5	0.0271739	25	0.0506073	5	0.0196078	44	0.0995475	90	0.204545	5	0.033557	29	0.0581162	4
GP1BA	2	0.0229885	3	0.00729927	13	0.0119926	10	0.03367	1	0.0277778	21	0.0353535	1	0.00549451	6	0.0102564	14	0.0267686	10	0.153846	22	0.0429688	23	0.0447471	7	0.0188172	8	0.0141343	2	0.00410678	3	0.0344828	9	0.0153846	6	0.0326087	16	0.0323887	2	0.00784314	10	0.0226244	9	0.0204545	5	0.033557	14	0.0280561	4
GP1BB	0	0	0	0	0	0	0	0	0	0	0	0	0	0	0	0	0	0	0	0	0	0	0	0	0	0	0	0	0	0	0	0	0	0	0	0	0	0	0	0	0	0	0	0	0	0	0	0	0
GP5	4	0.045977	12	0.0291971	8	0.00738007	1	0.003367	2	0.0555556	29	0.0488215	2	0.010989	5	0.00854701	9	0.0172084	3	0.0461538	23	0.0449219	6	0.0116732	20	0.0537634	13	0.0229682	7	0.0143737	7	0.0804598	1	0.0017094	8	0.0434783	25	0.0506073	7	0.027451	17	0.0384615	17	0.0386364	12	0.0805369	28	0.0561122	5
GP6	8	0.091954	28	0.0681265	40	0.0369004	16	0.0538721	1	0.0277778	18	0.030303	10	0.0549451	5	0.00854701	3	0.00573614	4	0.0615385	18	0.0351562	26	0.0505837	8	0.0215054	14	0.024735	29	0.0595483	2	0.0229885	6	0.0102564	7	0.0380435	21	0.0425101	6	0.0235294	6	0.0135747	26	0.0590909	11	0.0738255	19	0.0380762	8
GP9	2	0.0229885	8	0.0194647	23	0.0212177	15	0.0505051	3	0.0833333	15	0.0252525	5	0.0274725	8	0.0136752	41	0.0783939	2	0.0307692	10	0.0195312	17	0.0330739	4	0.0107527	11	0.0194346	15	0.0308008	2	0.0229885	9	0.0153846	3	0.0163043	26	0.0526316	5	0.0196078	14	0.0316742	11	0.025	14	0.0939597	22	0.0440882	4
GPR4	16	0.183908	13	0.0316302	33	0.0304428	12	0.040404	1	0.0277778	33	0.0555556	11	0.0604396	4	0.00683761	26	0.0497132	2	0.0307692	16	0.03125	18	0.0350195	10	0.0268817	21	0.0371025	9	0.0184805	2	0.0229885	5	0.00854701	6	0.0326087	23	0.0465587	10	0.0392157	17	0.0384615	23	0.0522727	5	0.033557	21	0.0420842	5
GPX1	3	0.0344828	13	0.0316302	46	0.0424354	5	0.016835	0	0	21	0.0353535	4	0.021978	8	0.0136752	10	0.0191205	3	0.0461538	2	0.00390625	24	0.0466926	15	0.0403226	20	0.0353357	9	0.0184805	2	0.0229885	14	0.0239316	5	0.0271739	15	0.0303644	8	0.0313725	10	0.0226244	14	0.0318182	5	0.033557	18	0.0360721	4
GRHL3	3	0.0344828	47	0.114355	50	0.0461255	26	0.0875421	0	0	25	0.0420875	7	0.0384615	5	0.00854701	24	0.0458891	0	0	14	0.0273438	12	0.0233463	11	0.0295699	10	0.0176678	21	0.0431211	2	0.0229885	12	0.0205128	8	0.0434783	20	0.0404858	5	0.0196078	39	0.0882353	6	0.0136364	10	0.0671141	22	0.0440882	2
HBEGF	6	0.0689655	6	0.0145985	27	0.0249077	15	0.0505051	2	0.0555556	26	0.043771	3	0.0164835	5	0.00854701	16	0.0305927	4	0.0615385	13	0.0253906	12	0.0233463	8	0.0215054	18	0.0318021	9	0.0184805	4	0.045977	16	0.0273504	9	0.048913	14	0.0283401	8	0.0313725	18	0.040724	19	0.0431818	6	0.0402685	15	0.0300601	2
HGFAC	1	0.0114943	7	0.0170316	35	0.0322878	8	0.026936	1	0.0277778	9	0.0151515	15	0.0824176	5	0.00854701	12	0.0229446	6	0.0923077	15	0.0292969	27	0.0525292	16	0.0430108	17	0.0300353	22	0.0451745	8	0.091954	2	0.0034188	15	0.0815217	16	0.0323887	2	0.00784314	7	0.0158371	19	0.0431818	7	0.0469799	11	0.0220441	7
HIF1A	5	0.0574713	7	0.0170316	55	0.050738	15	0.0505051	1	0.0277778	18	0.030303	3	0.0164835	5	0.00854701	33	0.0630975	3	0.0461538	17	0.0332031	21	0.040856	14	0.0376344	27	0.0477032	22	0.0451745	6	0.0689655	10	0.017094	8	0.0434783	17	0.034413	6	0.0235294	11	0.0248869	21	0.0477273	9	0.0604027	18	0.0360721	11
HMGB1	2	0.0229885	28	0.0681265	67	0.0618081	9	0.030303	3	0.0833333	112	0.188552	10	0.0549451	5	0.00854701	21	0.040153	1	0.0153846	13	0.0253906	21	0.040856	17	0.0456989	27	0.0477032	14	0.0287474	1	0.0114943	10	0.017094	5	0.0271739	25	0.0506073	8	0.0313725	28	0.0633484	56	0.127273	3	0.0201342	12	0.0240481	2
HMGCR	6	0.0689655	15	0.0364964	44	0.0405904	15	0.0505051	4	0.111111	20	0.03367	5	0.0274725	5	0.00854701	12	0.0229446	2	0.0307692	13	0.0253906	17	0.0330739	22	0.0591398	16	0.0282686	8	0.0164271	3	0.0344828	6	0.0102564	9	0.048913	14	0.0283401	14	0.054902	17	0.0384615	13	0.0295455	4	0.0268456	37	0.0741483	6
HMOX1	2	0.0229885	11	0.026764	12	0.0110701	8	0.026936	2	0.0555556	21	0.0353535	10	0.0549451	8	0.0136752	22	0.042065	9	0.138462	21	0.0410156	8	0.0155642	2	0.00537634	10	0.0176678	8	0.0164271	1	0.0114943	7	0.0119658	8	0.0434783	13	0.0263158	10	0.0392157	14	0.0316742	12	0.0272727	7	0.0469799	25	0.0501002	4
HNF4A	1	0.0114943	10	0.0243309	38	0.0350554	22	0.0740741	2	0.0555556	237	0.39899	32	0.175824	7	0.0119658	8	0.0152964	10	0.153846	37	0.0722656	2	0.00389105	13	0.0349462	19	0.0335689	3	0.00616016	6	0.0689655	5	0.00854701	10	0.0543478	9	0.0182186	6	0.0235294	14	0.0316742	80	0.181818	14	0.0939597	13	0.0260521	6
HPS1	2	0.0229885	11	0.026764	34	0.0313653	8	0.026936	2	0.0555556	19	0.0319865	6	0.032967	0	0	19	0.0363289	1	0.0153846	14	0.0273438	36	0.0700389	12	0.0322581	14	0.024735	12	0.0246407	2	0.0229885	13	0.0222222	8	0.0434783	11	0.0222672	8	0.0313725	10	0.0226244	19	0.0431818	4	0.0268456	18	0.0360721	1
HPS4	1	0.0114943	31	0.0754258	41	0.0378229	14	0.047138	3	0.0833333	18	0.030303	16	0.0879121	6	0.0102564	46	0.0879541	3	0.0461538	18	0.0351562	16	0.0311284	12	0.0322581	29	0.0512367	50	0.102669	1	0.0114943	15	0.025641	9	0.048913	19	0.0384615	19	0.0745098	45	0.10181	7	0.0159091	16	0.107383	17	0.0340681	3
HPS5	4	0.045977	9	0.0218978	32	0.0295203	13	0.043771	1	0.0277778	25	0.0420875	10	0.0549451	3	0.00512821	17	0.0325048	3	0.0461538	30	0.0585938	21	0.040856	21	0.0564516	16	0.0282686	14	0.0287474	1	0.0114943	12	0.0205128	9	0.048913	17	0.034413	7	0.027451	22	0.0497738	17	0.0386364	3	0.0201342	17	0.0340681	5
HPS6	3	0.0344828	13	0.0316302	40	0.0369004	8	0.026936	2	0.0555556	26	0.043771	10	0.0549451	1	0.0017094	16	0.0305927	3	0.0461538	14	0.0273438	19	0.036965	18	0.0483871	16	0.0282686	10	0.0205339	2	0.0229885	16	0.0273504	8	0.0434783	13	0.0263158	11	0.0431373	10	0.0226244	21	0.0477273	3	0.0201342	18	0.0360721	9
HPSE	4	0.045977	21	0.0510949	54	0.0498155	11	0.037037	1	0.0277778	20	0.03367	10	0.0549451	10	0.017094	15	0.0286807	2	0.0307692	22	0.0429688	25	0.0486381	15	0.0403226	17	0.0300353	17	0.0349076	3	0.0344828	6	0.0102564	9	0.048913	17	0.034413	14	0.054902	25	0.0565611	5	0.0113636	3	0.0201342	18	0.0360721	4
HRAS	3	0.0344828	17	0.0413625	38	0.0350554	12	0.040404	1	0.0277778	33	0.0555556	4	0.021978	6	0.0102564	18	0.0344168	5	0.0769231	24	0.046875	16	0.0311284	26	0.0698925	21	0.0371025	16	0.0328542	4	0.045977	14	0.0239316	8	0.0434783	22	0.0445344	8	0.0313725	22	0.0497738	32	0.0727273	2	0.0134228	20	0.0400802	2
HRG	1	0.0114943	5	0.0121655	7	0.00645756	10	0.03367	2	0.0555556	6	0.010101	41	0.225275	18	0.0307692	38	0.0726577	1	0.0153846	1	0.00195312	7	0.0136187	15	0.0403226	7	0.0123675	180	0.36961	6	0.0689655	29	0.0495726	10	0.0543478	10	0.0202429	11	0.0431373	17	0.0384615	13	0.0295455	11	0.0738255	9	0.0180361	8
IGF1	12	0.137931	11	0.026764	34	0.0313653	5	0.016835	1	0.0277778	18	0.030303	5	0.0274725	6	0.0102564	13	0.0248566	4	0.0615385	21	0.0410156	5	0.00972763	16	0.0430108	17	0.0300353	9	0.0184805	7	0.0804598	10	0.017094	4	0.0217391	21	0.0425101	10	0.0392157	6	0.0135747	13	0.0295455	12	0.0805369	12	0.0240481	1
IL1A	1	0.0114943	25	0.0608273	6	0.00553506	12	0.040404	3	0.0833333	21	0.0353535	7	0.0384615	9	0.0153846	20	0.0382409	3	0.0461538	4	0.0078125	21	0.040856	7	0.0188172	21	0.0371025	16	0.0328542	2	0.0229885	12	0.0205128	5	0.0271739	8	0.0161943	9	0.0352941	5	0.0113122	24	0.0545455	6	0.0402685	3	0.00601202	2
INSL3	15	0.172414	18	0.0437956	32	0.0295203	13	0.043771	1	0.0277778	35	0.0589226	7	0.0384615	5	0.00854701	16	0.0305927	5	0.0769231	26	0.0507812	23	0.0447471	19	0.0510753	19	0.0335689	12	0.0246407	4	0.045977	7	0.0119658	10	0.0543478	17	0.034413	8	0.0313725	15	0.0339367	20	0.0454545	1	0.00671141	14	0.0280561	5
ITGA2B	7	0.0804598	14	0.0340633	54	0.0498155	8	0.026936	1	0.0277778	16	0.026936	11	0.0604396	9	0.0153846	18	0.0344168	3	0.0461538	26	0.0507812	19	0.036965	5	0.0134409	28	0.04947	30	0.0616016	3	0.0344828	16	0.0273504	12	0.0652174	18	0.0364372	5	0.0196078	17	0.0384615	25	0.0568182	6	0.0402685	23	0.0460922	8
ITGB1	3	0.0344828	19	0.0462287	77	0.0710332	18	0.0606061	2	0.0555556	28	0.047138	11	0.0604396	4	0.00683761	35	0.0669216	2	0.0307692	21	0.0410156	29	0.0564202	27	0.0725806	17	0.0300353	23	0.0472279	2	0.0229885	23	0.0393162	8	0.0434783	18	0.0364372	8	0.0313725	5	0.0113122	14	0.0318182	6	0.0402685	16	0.0320641	3
ITGB3	4	0.045977	17	0.0413625	8	0.00738007	15	0.0505051	3	0.0833333	13	0.0218855	7	0.0384615	7	0.0119658	26	0.0497132	1	0.0153846	14	0.0273438	12	0.0233463	23	0.061828	18	0.0318021	18	0.036961	5	0.0574713	8	0.0136752	8	0.0434783	19	0.0384615	11	0.0431373	14	0.0316742	12	0.0272727	8	0.0536913	20	0.0400802	4
JAML	4	0.045977	13	0.0316302	43	0.0396679	18	0.0606061	1	0.0277778	26	0.043771	4	0.021978	8	0.0136752	20	0.0382409	7	0.107692	22	0.0429688	20	0.0389105	20	0.0537634	20	0.0353357	11	0.0225873	2	0.0229885	9	0.0153846	8	0.0434783	21	0.0425101	11	0.0431373	9	0.020362	16	0.0363636	3	0.0201342	22	0.0440882	8
KANK1	1	0.0114943	13	0.0316302	59	0.054428	23	0.0774411	1	0.0277778	48	0.0808081	4	0.021978	8	0.0136752	30	0.0573614	2	0.0307692	30	0.0585938	18	0.0350195	15	0.0403226	15	0.0265018	11	0.0225873	2	0.0229885	16	0.0273504	3	0.0163043	21	0.0425101	11	0.0431373	12	0.0271493	31	0.0704545	5	0.033557	19	0.0380762	9
KDR	4	0.045977	11	0.026764	40	0.0369004	8	0.026936	0	0	14	0.023569	6	0.032967	6	0.0102564	18	0.0344168	1	0.0153846	18	0.0351562	18	0.0350195	8	0.0215054	36	0.0636042	14	0.0287474	2	0.0229885	8	0.0136752	5	0.0271739	20	0.0404858	12	0.0470588	6	0.0135747	21	0.0477273	3	0.0201342	28	0.0561122	5
KLKB1	7	0.0804598	9	0.0218978	40	0.0369004	8	0.026936	5	0.138889	19	0.0319865	10	0.0549451	8	0.0136752	10	0.0191205	3	0.0461538	4	0.0078125	19	0.036965	12	0.0322581	8	0.0141343	11	0.0225873	3	0.0344828	5	0.00854701	3	0.0163043	26	0.0526316	11	0.0431373	28	0.0633484	17	0.0386364	2	0.0134228	22	0.0440882	3
KNG1	3	0.0344828	6	0.0145985	9	0.00830258	7	0.023569	3	0.0833333	36	0.0606061	3	0.0164835	11	0.0188034	12	0.0229446	2	0.0307692	2	0.00390625	5	0.00972763	20	0.0537634	14	0.024735	22	0.0451745	2	0.0229885	21	0.0358974	12	0.0652174	14	0.0283401	1	0.00392157	9	0.020362	26	0.0590909	9	0.0604027	8	0.0160321	7
KRT6A	1	0.0114943	22	0.053528	10	0.00922509	14	0.047138	3	0.0833333	19	0.0319865	7	0.0384615	1	0.0017094	23	0.0439771	3	0.0461538	12	0.0234375	18	0.0350195	11	0.0295699	16	0.0282686	20	0.0410678	4	0.045977	8	0.0136752	6	0.0326087	8	0.0161943	4	0.0156863	31	0.0701357	8	0.0181818	4	0.0268456	3	0.00601202	2
LNPK	4	0.045977	23	0.0559611	46	0.0424354	11	0.037037	5	0.138889	19	0.0319865	17	0.0934066	10	0.017094	44	0.08413	2	0.0307692	31	0.0605469	20	0.0389105	17	0.0456989	28	0.04947	37	0.0759754	6	0.0689655	20	0.034188	11	0.0597826	18	0.0364372	13	0.0509804	22	0.0497738	23	0.0522727	12	0.0805369	13	0.0260521	5
LOX	3	0.0344828	10	0.0243309	57	0.052583	7	0.023569	4	0.111111	15	0.0252525	5	0.0274725	6	0.0102564	21	0.040153	4	0.0615385	17	0.0332031	13	0.0252918	15	0.0403226	27	0.0477032	10	0.0205339	2	0.0229885	12	0.0205128	9	0.048913	24	0.048583	11	0.0431373	18	0.040724	10	0.0227273	10	0.0671141	21	0.0420842	5
LYN	6	0.0689655	16	0.0389294	85	0.0784133	11	0.037037	2	0.0555556	34	0.0572391	9	0.0494505	5	0.00854701	13	0.0248566	3	0.0461538	21	0.0410156	28	0.0544747	36	0.0967742	42	0.0742049	33	0.0677618	4	0.045977	19	0.0324786	7	0.0380435	33	0.0668016	10	0.0392157	10	0.0226244	28	0.0636364	5	0.033557	15	0.0300601	8
LYST	3	0.0344828	16	0.0389294	82	0.0756458	16	0.0538721	1	0.0277778	26	0.043771	14	0.0769231	7	0.0119658	27	0.0516252	1	0.0153846	27	0.0527344	23	0.0447471	24	0.0645161	27	0.0477032	16	0.0328542	3	0.0344828	16	0.0273504	6	0.0326087	18	0.0364372	14	0.054902	54	0.122172	12	0.0272727	10	0.0671141	25	0.0501002	5
MACF1	3	0.0344828	22	0.053528	33	0.0304428	19	0.0639731	3	0.0833333	25	0.0420875	11	0.0604396	3	0.00512821	27	0.0516252	0	0	16	0.03125	8	0.0155642	15	0.0403226	20	0.0353357	13	0.026694	6	0.0689655	33	0.0564103	3	0.0163043	18	0.0364372	12	0.0470588	24	0.0542986	10	0.0227273	15	0.100671	17	0.0340681	3
MAP3K1	14	0.16092	19	0.0462287	35	0.0322878	15	0.0505051	1	0.0277778	24	0.040404	2	0.010989	5	0.00854701	15	0.0286807	4	0.0615385	22	0.0429688	21	0.040856	22	0.0591398	24	0.0424028	13	0.026694	5	0.0574713	6	0.0102564	6	0.0326087	15	0.0303644	8	0.0313725	12	0.0271493	11	0.025	0	0	13	0.0260521	7
MERTK	2	0.0229885	23	0.0559611	46	0.0424354	16	0.0538721	2	0.0555556	30	0.0505051	14	0.0769231	8	0.0136752	36	0.0688337	5	0.0769231	26	0.0507812	20	0.0389105	14	0.0376344	17	0.0300353	36	0.073922	4	0.045977	14	0.0239316	8	0.0434783	20	0.0404858	9	0.0352941	17	0.0384615	20	0.0454545	8	0.0536913	31	0.0621242	8
MIA3	10	0.114943	23	0.0559611	228	0.210332	28	0.0942761	9	0.25	31	0.0521886	7	0.0384615	7	0.0119658	39	0.0745698	1	0.0153846	22	0.0429688	20	0.0389105	82	0.22043	47	0.0830389	18	0.036961	9	0.103448	35	0.0598291	9	0.048913	22	0.0445344	9	0.0352941	42	0.0950226	27	0.0613636	19	0.127517	27	0.0541082	13
MMP12	1	0.0114943	15	0.0364964	32	0.0295203	16	0.0538721	1	0.0277778	23	0.0387205	6	0.032967	1	0.0017094	27	0.0516252	1	0.0153846	5	0.00976562	11	0.0214008	6	0.016129	24	0.0424028	23	0.0472279	3	0.0344828	7	0.0119658	7	0.0380435	17	0.034413	1	0.00392157	7	0.0158371	14	0.0318182	2	0.0134228	9	0.0180361	8
MMRN1	2	0.0229885	14	0.0340633	38	0.0350554	11	0.037037	1	0.0277778	13	0.0218855	3	0.0164835	3	0.00512821	19	0.0363289	6	0.0923077	25	0.0488281	25	0.0486381	14	0.0376344	30	0.0530035	11	0.0225873	1	0.0114943	3	0.00512821	8	0.0434783	27	0.0546559	6	0.0235294	9	0.020362	13	0.0295455	8	0.0536913	27	0.0541082	6
MPIG6B	4	0.045977	17	0.0413625	44	0.0405904	13	0.043771	2	0.0555556	25	0.0420875	4	0.021978	6	0.0102564	23	0.0439771	4	0.0615385	21	0.0410156	12	0.0233463	5	0.0134409	17	0.0300353	16	0.0328542	5	0.0574713	31	0.0529915	6	0.0326087	18	0.0364372	3	0.0117647	17	0.0384615	9	0.0204545	8	0.0536913	8	0.0160321	6
MRTFA	2	0.0229885	7	0.0170316	34	0.0313653	11	0.037037	3	0.0833333	22	0.037037	3	0.0164835	4	0.00683761	39	0.0745698	6	0.0923077	29	0.0566406	26	0.0505837	26	0.0698925	17	0.0300353	36	0.073922	2	0.0229885	4	0.00683761	6	0.0326087	22	0.0445344	14	0.054902	48	0.108597	18	0.0409091	8	0.0536913	13	0.0260521	2
MSX2	30	0.344828	12	0.0291971	45	0.0415129	6	0.020202	3	0.0833333	21	0.0353535	9	0.0494505	6	0.0102564	14	0.0267686	3	0.0461538	51	0.0996094	21	0.040856	19	0.0510753	21	0.0371025	4	0.00821355	4	0.045977	4	0.00683761	13	0.0706522	17	0.034413	4	0.0156863	17	0.0384615	23	0.0522727	5	0.033557	24	0.0480962	4
MTOR	3	0.0344828	30	0.0729927	29	0.0267528	25	0.0841751	0	0	12	0.020202	12	0.0659341	5	0.00854701	27	0.0516252	0	0	16	0.03125	13	0.0252918	5	0.0134409	33	0.0583039	15	0.0308008	4	0.045977	18	0.0307692	3	0.0163043	18	0.0364372	23	0.0901961	29	0.0656109	22	0.05	7	0.0469799	17	0.0340681	4
MUC16	6	0.0689655	17	0.0413625	49	0.045203	7	0.023569	4	0.111111	9	0.0151515	7	0.0384615	10	0.017094	11	0.0210325	3	0.0461538	2	0.00390625	7	0.0136187	2	0.00537634	20	0.0353357	19	0.0390144	5	0.0574713	10	0.017094	12	0.0652174	13	0.0263158	6	0.0235294	5	0.0113122	14	0.0318182	11	0.0738255	14	0.0280561	3
MUSTN1	1	0.0114943	1	0.00243309	21	0.0193727	10	0.03367	0	0	17	0.0286195	4	0.021978	6	0.0102564	14	0.0267686	3	0.0461538	5	0.00976562	15	0.0291829	8	0.0215054	9	0.0159011	8	0.0164271	1	0.0114943	2	0.0034188	8	0.0434783	4	0.00809717	3	0.0117647	17	0.0384615	16	0.0363636	8	0.0536913	16	0.0320641	6
MYH10	3	0.0344828	4	0.00973236	3	0.00276753	3	0.010101	4	0.111111	10	0.016835	0	0	6	0.0102564	7	0.0133843	2	0.0307692	4	0.0078125	9	0.0175097	8	0.0215054	17	0.0300353	6	0.0123203	1	0.0114943	0	0	8	0.0434783	5	0.0101215	1	0.00392157	15	0.0339367	0	0	4	0.0268456	2	0.00400802	8
MYH2	3	0.0344828	21	0.0510949	53	0.048893	14	0.047138	1	0.0277778	15	0.0252525	13	0.0714286	6	0.0102564	39	0.0745698	4	0.0615385	22	0.0429688	21	0.040856	12	0.0322581	26	0.0459364	34	0.0698152	1	0.0114943	5	0.00854701	8	0.0434783	14	0.0283401	9	0.0352941	29	0.0656109	8	0.0181818	5	0.033557	13	0.0260521	4
MYH9	1	0.0114943	4	0.00973236	29	0.0267528	17	0.0572391	1	0.0277778	20	0.03367	6	0.032967	6	0.0102564	19	0.0363289	1	0.0153846	22	0.0429688	13	0.0252918	9	0.0241935	13	0.0229682	8	0.0164271	1	0.0114943	9	0.0153846	6	0.0326087	21	0.0425101	19	0.0745098	19	0.0429864	12	0.0272727	8	0.0536913	17	0.0340681	4
MYLK	4	0.045977	11	0.026764	45	0.0415129	8	0.026936	1	0.0277778	24	0.040404	4	0.021978	5	0.00854701	60	0.114723	3	0.0461538	12	0.0234375	18	0.0350195	18	0.0483871	18	0.0318021	16	0.0328542	5	0.0574713	14	0.0239316	4	0.0217391	24	0.048583	17	0.0666667	7	0.0158371	14	0.0318182	2	0.0134228	17	0.0340681	4
MYOF	2	0.0229885	12	0.0291971	26	0.0239852	11	0.037037	4	0.111111	23	0.0387205	5	0.0274725	0	0	14	0.0267686	2	0.0307692	26	0.0507812	29	0.0564202	22	0.0591398	17	0.0300353	12	0.0246407	2	0.0229885	12	0.0205128	11	0.0597826	15	0.0303644	5	0.0196078	5	0.0113122	17	0.0386364	11	0.0738255	14	0.0280561	6
MYOZ1	5	0.0574713	5	0.0121655	13	0.0119926	7	0.023569	2	0.0555556	28	0.047138	1	0.00549451	8	0.0136752	8	0.0152964	4	0.0615385	15	0.0292969	20	0.0389105	16	0.0430108	25	0.0441696	13	0.026694	1	0.0114943	16	0.0273504	4	0.0217391	7	0.01417	2	0.00784314	5	0.0113122	15	0.0340909	4	0.0268456	11	0.0220441	3
NACA	23	0.264368	18	0.0437956	59	0.054428	21	0.0707071	4	0.111111	38	0.0639731	11	0.0604396	15	0.025641	27	0.0516252	5	0.0769231	38	0.0742188	18	0.0350195	34	0.0913978	25	0.0441696	30	0.0616016	6	0.0689655	15	0.025641	10	0.0543478	20	0.0404858	18	0.0705882	21	0.0475113	26	0.0590909	21	0.14094	25	0.0501002	5
NBEAL2	3	0.0344828	21	0.0510949	44	0.0405904	13	0.043771	0	0	22	0.037037	2	0.010989	3	0.00512821	8	0.0152964	2	0.0307692	4	0.0078125	27	0.0525292	23	0.061828	9	0.0159011	9	0.0184805	3	0.0344828	15	0.025641	4	0.0217391	24	0.048583	6	0.0235294	26	0.0588235	17	0.0386364	3	0.0201342	20	0.0400802	4
NDNF	4	0.045977	15	0.0364964	17	0.0156827	5	0.016835	1	0.0277778	23	0.0387205	10	0.0549451	9	0.0153846	12	0.0229446	4	0.0615385	19	0.0371094	10	0.0194553	2	0.00537634	17	0.0300353	5	0.0102669	4	0.045977	2	0.0034188	10	0.0543478	23	0.0465587	12	0.0470588	6	0.0135747	11	0.025	4	0.0268456	15	0.0300601	4
NF1	5	0.0574713	46	0.111922	84	0.0774908	16	0.0538721	1	0.0277778	36	0.0606061	8	0.043956	6	0.0102564	25	0.0478011	0	0	18	0.0351562	15	0.0291829	24	0.0645161	54	0.0954064	29	0.0595483	1	0.0114943	1	0.0017094	9	0.048913	21	0.0425101	11	0.0431373	24	0.0542986	25	0.0568182	6	0.0402685	15	0.0300601	9
NFE2L2	4	0.045977	18	0.0437956	39	0.0359779	11	0.037037	3	0.0833333	27	0.0454545	18	0.0989011	6	0.0102564	53	0.101338	2	0.0307692	34	0.0664062	19	0.036965	15	0.0403226	7	0.0123675	40	0.0821355	4	0.045977	34	0.0581197	7	0.0380435	15	0.0303644	10	0.0392157	23	0.0520362	17	0.0386364	5	0.033557	1	0.00200401	4
NLRP6	2	0.0229885	15	0.0364964	33	0.0304428	13	0.043771	1	0.0277778	16	0.026936	7	0.0384615	7	0.0119658	25	0.0478011	3	0.0461538	22	0.0429688	13	0.0252918	24	0.0645161	12	0.0212014	6	0.0123203	1	0.0114943	7	0.0119658	2	0.0108696	19	0.0384615	6	0.0235294	19	0.0429864	11	0.025	2	0.0134228	16	0.0320641	2
NOG	7	0.0804598	13	0.0316302	9	0.00830258	4	0.013468	3	0.0833333	25	0.0420875	8	0.043956	6	0.0102564	1	0.00191205	3	0.0461538	8	0.015625	24	0.0466926	11	0.0295699	21	0.0371025	5	0.0102669	4	0.045977	11	0.0188034	6	0.0326087	22	0.0445344	10	0.0392157	5	0.0113122	11	0.025	14	0.0939597	10	0.0200401	2
NOTCH2	5	0.0574713	12	0.0291971	64	0.0590406	33	0.111111	4	0.111111	28	0.047138	8	0.043956	8	0.0136752	18	0.0344168	2	0.0307692	19	0.0371094	11	0.0214008	13	0.0349462	33	0.0583039	23	0.0472279	5	0.0574713	18	0.0307692	5	0.0271739	26	0.0526316	7	0.027451	37	0.0837104	15	0.0340909	11	0.0738255	23	0.0460922	8
NR4A3	10	0.114943	7	0.0170316	41	0.0378229	20	0.0673401	1	0.0277778	26	0.043771	6	0.032967	4	0.00683761	22	0.042065	2	0.0307692	14	0.0273438	11	0.0214008	3	0.00806452	14	0.024735	12	0.0246407	3	0.0344828	11	0.0188034	4	0.0217391	21	0.0425101	18	0.0705882	12	0.0271493	9	0.0204545	8	0.0536913	17	0.0340681	6
P2RX1	1	0.0114943	27	0.0656934	34	0.0313653	46	0.154882	3	0.0833333	27	0.0454545	26	0.142857	8	0.0136752	79	0.151052	2	0.0307692	32	0.0625	21	0.040856	20	0.0537634	23	0.040636	43	0.0882957	5	0.0574713	14	0.0239316	2	0.0108696	18	0.0364372	10	0.0392157	17	0.0384615	10	0.0227273	13	0.0872483	22	0.0440882	6
P2RY1	3	0.0344828	4	0.00973236	35	0.0322878	12	0.040404	4	0.111111	38	0.0639731	3	0.0164835	10	0.017094	17	0.0325048	4	0.0615385	27	0.0527344	23	0.0447471	12	0.0322581	10	0.0176678	5	0.0102669	5	0.0574713	12	0.0205128	9	0.048913	25	0.0506073	6	0.0235294	12	0.0271493	9	0.0204545	4	0.0268456	20	0.0400802	6
P2RY12	1	0.0114943	28	0.0681265	54	0.0498155	11	0.037037	2	0.0555556	22	0.037037	8	0.043956	5	0.00854701	33	0.0630975	7	0.107692	20	0.0390625	28	0.0544747	14	0.0376344	47	0.0830389	23	0.0472279	7	0.0804598	45	0.0769231	10	0.0543478	19	0.0384615	23	0.0901961	26	0.0588235	48	0.109091	4	0.0268456	22	0.0440882	7
PAK1	3	0.0344828	10	0.0243309	31	0.0285978	12	0.040404	2	0.0555556	22	0.037037	10	0.0549451	2	0.0034188	14	0.0267686	4	0.0615385	14	0.0273438	26	0.0505837	6	0.016129	18	0.0318021	9	0.0184805	4	0.045977	5	0.00854701	8	0.0434783	14	0.0283401	9	0.0352941	13	0.0294118	21	0.0477273	6	0.0402685	20	0.0400802	4
PAPSS2	3	0.0344828	16	0.0389294	81	0.0747232	11	0.037037	4	0.111111	22	0.037037	14	0.0769231	1	0.0017094	36	0.0688337	1	0.0153846	15	0.0292969	22	0.0428016	30	0.0806452	39	0.0689046	30	0.0616016	4	0.045977	38	0.0649573	5	0.0271739	5	0.0101215	6	0.0235294	17	0.0384615	34	0.0772727	4	0.0268456	11	0.0220441	4
PARD3	5	0.0574713	59	0.143552	126	0.116236	138	0.464646	2	0.0555556	22	0.037037	60	0.32967	9	0.0153846	68	0.130019	2	0.0307692	14	0.0273438	18	0.0350195	30	0.0806452	35	0.0618375	111	0.227926	8	0.091954	60	0.102564	16	0.0869565	44	0.0890688	14	0.054902	21	0.0475113	48	0.109091	14	0.0939597	12	0.0240481	2
PDCD10	8	0.091954	23	0.0559611	20	0.0184502	11	0.037037	2	0.0555556	52	0.0875421	18	0.0989011	43	0.0735043	47	0.0898662	6	0.0923077	32	0.0625	51	0.0992218	23	0.061828	33	0.0583039	42	0.0862423	2	0.0229885	7	0.0119658	11	0.0597826	29	0.0587045	9	0.0352941	56	0.126697	35	0.0795455	20	0.134228	22	0.0440882	3
PDGFA	3	0.0344828	16	0.0389294	45	0.0415129	21	0.0707071	2	0.0555556	31	0.0521886	11	0.0604396	4	0.00683761	32	0.0611855	1	0.0153846	14	0.0273438	29	0.0564202	6	0.016129	21	0.0371025	22	0.0451745	0	0	5	0.00854701	9	0.048913	21	0.0425101	13	0.0509804	21	0.0475113	23	0.0522727	10	0.0671141	28	0.0561122	5
PDGFB	3	0.0344828	17	0.0413625	45	0.0415129	8	0.026936	4	0.111111	21	0.0353535	13	0.0714286	29	0.0495726	28	0.0535373	8	0.123077	26	0.0507812	20	0.0389105	13	0.0349462	15	0.0265018	21	0.0431211	3	0.0344828	6	0.0102564	8	0.0434783	3	0.00607287	10	0.0392157	10	0.0226244	16	0.0363636	7	0.0469799	28	0.0561122	5
PDGFRA	1	0.0114943	18	0.0437956	32	0.0295203	14	0.047138	0	0	19	0.0319865	6	0.032967	10	0.017094	22	0.042065	1	0.0153846	7	0.0136719	30	0.0583658	9	0.0241935	19	0.0335689	13	0.026694	3	0.0344828	8	0.0136752	11	0.0597826	15	0.0303644	19	0.0745098	1	0.00226244	11	0.025	8	0.0536913	15	0.0300601	3
PDPN	3	0.0344828	22	0.053528	44	0.0405904	6	0.020202	5	0.138889	25	0.0420875	13	0.0714286	8	0.0136752	20	0.0382409	5	0.0769231	22	0.0429688	15	0.0291829	5	0.0134409	7	0.0123675	17	0.0349076	4	0.045977	6	0.0102564	10	0.0543478	21	0.0425101	7	0.027451	20	0.0452489	16	0.0363636	12	0.0805369	21	0.0420842	5
PEAR1	3	0.0344828	14	0.0340633	32	0.0295203	15	0.0505051	3	0.0833333	21	0.0353535	7	0.0384615	3	0.00512821	16	0.0305927	0	0	18	0.0351562	26	0.0505837	14	0.0376344	18	0.0318021	13	0.026694	3	0.0344828	9	0.0153846	3	0.0163043	29	0.0587045	11	0.0431373	15	0.0339367	20	0.0454545	7	0.0469799	22	0.0440882	6
PECAM1	4	0.045977	7	0.0170316	16	0.0147601	15	0.0505051	3	0.0833333	25	0.0420875	7	0.0384615	5	0.00854701	19	0.0363289	4	0.0615385	10	0.0195312	11	0.0214008	6	0.016129	5	0.00883392	15	0.0308008	2	0.0229885	17	0.0290598	6	0.0326087	17	0.034413	7	0.027451	18	0.040724	15	0.0340909	6	0.0402685	12	0.0240481	1
PF4	2	0.0229885	15	0.0364964	41	0.0378229	26	0.0875421	2	0.0555556	20	0.03367	32	0.175824	4	0.00683761	66	0.126195	2	0.0307692	18	0.0351562	20	0.0389105	18	0.0483871	31	0.0547703	56	0.11499	5	0.0574713	17	0.0290598	10	0.0543478	20	0.0404858	19	0.0745098	10	0.0226244	14	0.0318182	12	0.0805369	19	0.0380762	4
PHLDB2	4	0.045977	27	0.0656934	69	0.0636531	50	0.16835	2	0.0555556	29	0.0488215	36	0.197802	13	0.0222222	84	0.160612	1	0.0153846	18	0.0351562	25	0.0486381	24	0.0645161	41	0.0724382	83	0.170431	8	0.091954	71	0.121368	8	0.0434783	30	0.0607287	8	0.0313725	18	0.040724	36	0.0818182	16	0.107383	18	0.0360721	8
PIK3CB	7	0.0804598	13	0.0316302	45	0.0415129	14	0.047138	1	0.0277778	27	0.0454545	6	0.032967	10	0.017094	18	0.0344168	6	0.0923077	19	0.0371094	26	0.0505837	13	0.0349462	13	0.0229682	8	0.0164271	4	0.045977	4	0.00683761	6	0.0326087	15	0.0303644	27	0.105882	20	0.0452489	15	0.0340909	14	0.0939597	16	0.0320641	6
PIP5K1C	24	0.275862	25	0.0608273	41	0.0378229	9	0.030303	3	0.0833333	27	0.0454545	22	0.120879	10	0.017094	32	0.0611855	4	0.0615385	33	0.0644531	30	0.0583658	6	0.016129	48	0.0848057	39	0.0800821	6	0.0689655	26	0.0444444	14	0.076087	18	0.0364372	22	0.0862745	23	0.0520362	23	0.0522727	1	0.00671141	23	0.0460922	3
PLA2G4A	5	0.0574713	18	0.0437956	50	0.0461255	20	0.0673401	3	0.0833333	15	0.0252525	15	0.0824176	4	0.00683761	23	0.0439771	2	0.0307692	25	0.0488281	24	0.0466926	20	0.0537634	20	0.0353357	17	0.0349076	5	0.0574713	16	0.0273504	6	0.0326087	8	0.0161943	6	0.0235294	4	0.00904977	13	0.0295455	7	0.0469799	24	0.0480962	2
PLAU	1	0.0114943	29	0.0705596	125	0.115314	16	0.0538721	2	0.0555556	46	0.0774411	40	0.21978	4	0.00683761	89	0.170172	5	0.0769231	28	0.0546875	35	0.0680934	61	0.163978	34	0.0600707	70	0.143737	6	0.0689655	87	0.148718	23	0.125	35	0.0708502	19	0.0745098	33	0.0746606	31	0.0704545	28	0.187919	25	0.0501002	4
PLEC	12	0.137931	8	0.0194647	43	0.0396679	3	0.010101	1	0.0277778	26	0.043771	8	0.043956	4	0.00683761	13	0.0248566	2	0.0307692	23	0.0449219	13	0.0252918	19	0.0510753	19	0.0335689	24	0.0492813	2	0.0229885	13	0.0222222	7	0.0380435	11	0.0222672	12	0.0470588	17	0.0384615	7	0.0159091	4	0.0268456	27	0.0541082	7
PLEK	4	0.045977	15	0.0364964	30	0.0276753	14	0.047138	1	0.0277778	22	0.037037	10	0.0549451	5	0.00854701	18	0.0344168	4	0.0615385	27	0.0527344	31	0.0603113	8	0.0215054	26	0.0459364	3	0.00616016	5	0.0574713	10	0.017094	9	0.048913	21	0.0425101	9	0.0352941	27	0.061086	21	0.0477273	5	0.033557	22	0.0440882	8
PLET1	2	0.0229885	5	0.0121655	7	0.00645756	4	0.013468	0	0	32	0.0538721	0	0	7	0.0119658	14	0.0267686	4	0.0615385	22	0.0429688	8	0.0155642	12	0.0322581	5	0.00883392	15	0.0308008	1	0.0114943	0	0	10	0.0543478	10	0.0202429	13	0.0509804	6	0.0135747	0	0	8	0.0536913	11	0.0220441	5
PLG	3	0.0344828	17	0.0413625	28	0.0258303	11	0.037037	3	0.0833333	28	0.047138	10	0.0549451	9	0.0153846	19	0.0363289	0	0	14	0.0273438	18	0.0350195	15	0.0403226	14	0.024735	15	0.0308008	3	0.0344828	17	0.0290598	6	0.0326087	26	0.0526316	14	0.054902	24	0.0542986	14	0.0318182	6	0.0402685	21	0.0420842	7
PLPP3	2	0.0229885	5	0.0121655	37	0.0341328	14	0.047138	3	0.0833333	25	0.0420875	7	0.0384615	4	0.00683761	23	0.0439771	4	0.0615385	10	0.0195312	18	0.0350195	15	0.0403226	7	0.0123675	14	0.0287474	3	0.0344828	19	0.0324786	11	0.0597826	13	0.0263158	12	0.0470588	12	0.0271493	14	0.0318182	3	0.0201342	13	0.0260521	7
POU2F3	3	0.0344828	13	0.0316302	61	0.0562731	12	0.040404	1	0.0277778	13	0.0218855	12	0.0659341	5	0.00854701	28	0.0535373	2	0.0307692	24	0.046875	16	0.0311284	17	0.0456989	28	0.04947	44	0.0903491	2	0.0229885	6	0.0102564	6	0.0326087	17	0.034413	12	0.0470588	39	0.0882353	17	0.0386364	5	0.033557	12	0.0240481	6
PPARA	2	0.0229885	15	0.0364964	74	0.0682657	14	0.047138	3	0.0833333	28	0.047138	5	0.0274725	7	0.0119658	27	0.0516252	14	0.215385	19	0.0371094	22	0.0428016	23	0.061828	29	0.0512367	16	0.0328542	4	0.045977	34	0.0581197	3	0.0163043	21	0.0425101	25	0.0980392	18	0.040724	30	0.0681818	7	0.0469799	16	0.0320641	7
PPARD	6	0.0689655	41	0.0997567	87	0.0802583	18	0.0606061	3	0.0833333	90	0.151515	11	0.0604396	8	0.0136752	40	0.0764818	5	0.0769231	28	0.0546875	41	0.0797665	38	0.102151	61	0.107774	40	0.0821355	7	0.0804598	12	0.0205128	9	0.048913	34	0.0688259	20	0.0784314	73	0.165158	49	0.111364	42	0.281879	26	0.0521042	4
PPIA	2	0.0229885	12	0.0291971	55	0.050738	21	0.0707071	4	0.111111	33	0.0555556	3	0.0164835	8	0.0136752	20	0.0382409	3	0.0461538	31	0.0605469	30	0.0583658	12	0.0322581	45	0.0795053	19	0.0390144	5	0.0574713	9	0.0153846	14	0.076087	16	0.0323887	11	0.0431373	25	0.0565611	5	0.0113636	6	0.0402685	22	0.0440882	8
PPL	11	0.126437	18	0.0437956	24	0.0221402	14	0.047138	2	0.0555556	34	0.0572391	8	0.043956	10	0.017094	16	0.0305927	1	0.0153846	15	0.0292969	28	0.0544747	8	0.0215054	29	0.0512367	27	0.0554415	5	0.0574713	19	0.0324786	6	0.0326087	17	0.034413	12	0.0470588	10	0.0226244	23	0.0522727	1	0.00671141	23	0.0460922	5
PRCP	3	0.0344828	19	0.0462287	54	0.0498155	13	0.043771	1	0.0277778	26	0.043771	14	0.0769231	8	0.0136752	27	0.0516252	4	0.0615385	6	0.0117188	18	0.0350195	25	0.0672043	11	0.0194346	23	0.0472279	3	0.0344828	40	0.0683761	6	0.0326087	15	0.0303644	13	0.0509804	16	0.0361991	16	0.0363636	5	0.033557	32	0.0641283	7
PRDX2	8	0.091954	27	0.0656934	54	0.0498155	14	0.047138	1	0.0277778	31	0.0521886	9	0.0494505	7	0.0119658	32	0.0611855	2	0.0307692	17	0.0332031	25	0.0486381	27	0.0725806	39	0.0689046	27	0.0554415	7	0.0804598	15	0.025641	6	0.0326087	22	0.0445344	15	0.0588235	21	0.0475113	24	0.0545455	4	0.0268456	26	0.0521042	8
PRKCA	3	0.0344828	21	0.0510949	48	0.0442804	15	0.0505051	0	0	21	0.0353535	8	0.043956	5	0.00854701	6	0.0114723	3	0.0461538	7	0.0136719	26	0.0505837	29	0.077957	14	0.024735	4	0.00821355	2	0.0229885	14	0.0239316	6	0.0326087	25	0.0506073	7	0.027451	13	0.0294118	20	0.0454545	5	0.033557	17	0.0340681	8
PRKCD	3	0.0344828	34	0.0827251	31	0.0285978	16	0.0538721	3	0.0833333	33	0.0555556	11	0.0604396	5	0.00854701	29	0.0554493	3	0.0461538	35	0.0683594	25	0.0486381	9	0.0241935	23	0.040636	19	0.0390144	2	0.0229885	48	0.0820513	9	0.048913	19	0.0384615	14	0.054902	22	0.0497738	10	0.0227273	9	0.0604027	20	0.0400802	6
PRKCE	3	0.0344828	20	0.0486618	65	0.0599631	6	0.020202	3	0.0833333	36	0.0606061	5	0.0274725	4	0.00683761	9	0.0172084	0	0	23	0.0449219	2	0.00389105	10	0.0268817	20	0.0353357	23	0.0472279	3	0.0344828	24	0.0410256	6	0.0326087	10	0.0202429	3	0.0117647	10	0.0226244	17	0.0386364	5	0.033557	22	0.0440882	3
PRKCQ	10	0.114943	12	0.0291971	41	0.0378229	6	0.020202	4	0.111111	26	0.043771	6	0.032967	1	0.0017094	24	0.0458891	0	0	26	0.0507812	15	0.0291829	11	0.0295699	25	0.0441696	17	0.0349076	4	0.045977	5	0.00854701	9	0.048913	14	0.0283401	11	0.0431373	26	0.0588235	15	0.0340909	9	0.0604027	21	0.0420842	5
PRKG1	3	0.0344828	10	0.0243309	31	0.0285978	13	0.043771	1	0.0277778	40	0.0673401	3	0.0164835	7	0.0119658	28	0.0535373	3	0.0461538	12	0.0234375	21	0.040856	14	0.0376344	10	0.0176678	6	0.0123203	5	0.0574713	10	0.017094	11	0.0597826	9	0.0182186	3	0.0117647	18	0.040724	13	0.0295455	11	0.0738255	13	0.0260521	5
PROC	2	0.0229885	12	0.0291971	41	0.0378229	23	0.0774411	1	0.0277778	113	0.190236	18	0.0989011	12	0.0205128	45	0.0860421	6	0.0923077	28	0.0546875	19	0.036965	7	0.0188172	33	0.0583039	44	0.0903491	3	0.0344828	6	0.0102564	5	0.0271739	16	0.0323887	17	0.0666667	35	0.0791855	52	0.118182	14	0.0939597	16	0.0320641	7
PROCR	3	0.0344828	21	0.0510949	39	0.0359779	33	0.111111	1	0.0277778	26	0.043771	6	0.032967	9	0.0153846	50	0.0956023	3	0.0461538	22	0.0429688	20	0.0389105	16	0.0430108	23	0.040636	23	0.0472279	7	0.0804598	15	0.025641	9	0.048913	22	0.0445344	9	0.0352941	21	0.0475113	24	0.0545455	8	0.0536913	15	0.0300601	4
PROS1	4	0.045977	27	0.0656934	17	0.0156827	14	0.047138	3	0.0833333	33	0.0555556	7	0.0384615	9	0.0153846	19	0.0363289	5	0.0769231	3	0.00585938	27	0.0525292	16	0.0430108	36	0.0636042	34	0.0698152	3	0.0344828	10	0.017094	10	0.0543478	19	0.0384615	5	0.0196078	16	0.0361991	11	0.025	5	0.033557	30	0.0601202	5
PROZ	4	0.045977	0	0	0	0	0	0	0	0	0	0	0	0	0	0	0	0	0	0	0	0	0	0	0	0	0	0	0	0	0	0	0	0	0	0	0	0	0	0	0	0	0	0	0	0	0	0	0
PRSS56	0	0	14	0.0340633	25	0.0230627	12	0.040404	3	0.0833333	15	0.0252525	5	0.0274725	1	0.0017094	22	0.042065	2	0.0307692	17	0.0332031	18	0.0350195	15	0.0403226	16	0.0282686	13	0.026694	1	0.0114943	7	0.0119658	5	0.0271739	13	0.0263158	3	0.0117647	12	0.0271493	11	0.025	5	0.033557	20	0.0400802	2
PTEN	7	0.0804598	15	0.0364964	32	0.0295203	23	0.0774411	1	0.0277778	26	0.043771	3	0.0164835	9	0.0153846	17	0.0325048	0	0	33	0.0644531	19	0.036965	5	0.0134409	16	0.0282686	7	0.0143737	3	0.0344828	16	0.0273504	10	0.0543478	23	0.0465587	11	0.0431373	9	0.020362	18	0.0409091	5	0.033557	15	0.0300601	4
PTGER3	4	0.045977	32	0.0778589	34	0.0313653	16	0.0538721	1	0.0277778	25	0.0420875	17	0.0934066	5	0.00854701	28	0.0535373	3	0.0461538	23	0.0449219	17	0.0330739	13	0.0349462	18	0.0318021	33	0.0677618	4	0.045977	15	0.025641	7	0.0380435	16	0.0323887	12	0.0470588	15	0.0339367	27	0.0613636	4	0.0268456	22	0.0440882	5
PTGER4	4	0.045977	58	0.141119	375	0.345941	36	0.121212	9	0.25	186	0.313131	38	0.208791	14	0.0239316	99	0.189293	7	0.107692	22	0.0429688	48	0.0933852	150	0.403226	117	0.206714	99	0.203285	6	0.0689655	147	0.251282	37	0.201087	73	0.147773	27	0.105882	71	0.160633	137	0.311364	37	0.248322	10	0.0200401	9
PTK2	11	0.126437	18	0.0437956	102	0.0940959	15	0.0505051	5	0.138889	24	0.040404	17	0.0934066	4	0.00683761	29	0.0554493	9	0.138462	19	0.0371094	23	0.0447471	34	0.0913978	54	0.0954064	41	0.0841889	4	0.045977	16	0.0273504	13	0.0706522	19	0.0384615	18	0.0705882	43	0.0972851	27	0.0613636	10	0.0671141	26	0.0521042	4
PTK7	2	0.0229885	17	0.0413625	34	0.0313653	14	0.047138	1	0.0277778	39	0.0656566	1	0.00549451	6	0.0102564	17	0.0325048	4	0.0615385	27	0.0527344	32	0.0622568	14	0.0376344	19	0.0335689	14	0.0287474	4	0.045977	46	0.0786325	7	0.0380435	11	0.0222672	7	0.027451	10	0.0226244	14	0.0318182	0	0	14	0.0280561	6
PTPN6	11	0.126437	11	0.026764	48	0.0442804	11	0.037037	1	0.0277778	24	0.040404	8	0.043956	5	0.00854701	24	0.0458891	4	0.0615385	24	0.046875	26	0.0505837	11	0.0295699	22	0.0388693	18	0.036961	2	0.0229885	13	0.0222222	9	0.048913	20	0.0404858	13	0.0509804	14	0.0316742	9	0.0204545	4	0.0268456	17	0.0340681	6
PTPRJ	5	0.0574713	10	0.0243309	49	0.045203	18	0.0606061	1	0.0277778	29	0.0488215	15	0.0824176	8	0.0136752	27	0.0516252	4	0.0615385	24	0.046875	20	0.0389105	24	0.0645161	21	0.0371025	32	0.0657084	2	0.0229885	24	0.0410256	7	0.0380435	21	0.0425101	6	0.0235294	23	0.0520362	19	0.0431818	6	0.0402685	27	0.0541082	8
RAB27A	4	0.045977	14	0.0340633	39	0.0359779	14	0.047138	1	0.0277778	18	0.030303	14	0.0769231	11	0.0188034	16	0.0305927	3	0.0461538	10	0.0195312	23	0.0447471	13	0.0349462	13	0.0229682	14	0.0287474	2	0.0229885	9	0.0153846	9	0.048913	26	0.0526316	20	0.0784314	18	0.040724	17	0.0386364	6	0.0402685	13	0.0260521	2
RAB3A	4	0.045977	48	0.116788	91	0.0839483	34	0.114478	4	0.111111	27	0.0454545	24	0.131868	4	0.00683761	70	0.133843	4	0.0615385	20	0.0390625	18	0.0350195	18	0.0483871	25	0.0441696	193	0.396304	5	0.0574713	32	0.0547009	12	0.0652174	20	0.0404858	11	0.0431373	23	0.0520362	35	0.0795455	9	0.0604027	24	0.0480962	4
RAP2B	4	0.045977	7	0.0170316	4	0.00369004	1	0.003367	1	0.0277778	9	0.0151515	9	0.0494505	2	0.0034188	9	0.0172084	4	0.0615385	4	0.0078125	3	0.00583658	7	0.0188172	2	0.00353357	29	0.0595483	3	0.0344828	7	0.0119658	7	0.0380435	7	0.01417	5	0.0196078	1	0.00226244	8	0.0181818	6	0.0402685	2	0.00400802	2
REG3A	1	0.0114943	6	0.0145985	13	0.0119926	3	0.010101	1	0.0277778	5	0.00841751	3	0.0164835	6	0.0102564	7	0.0133843	0	0	2	0.00390625	12	0.0233463	5	0.0134409	3	0.00530035	1	0.00205339	8	0.091954	10	0.017094	7	0.0380435	5	0.0101215	10	0.0392157	1	0.00226244	17	0.0386364	4	0.0268456	19	0.0380762	4
REG3G	3	0.0344828	13	0.0316302	28	0.0258303	15	0.0505051	4	0.111111	20	0.03367	6	0.032967	7	0.0119658	16	0.0305927	3	0.0461538	16	0.03125	23	0.0447471	33	0.0887097	26	0.0459364	21	0.0431211	3	0.0344828	17	0.0290598	2	0.0108696	12	0.0242915	6	0.0235294	62	0.140271	19	0.0431818	5	0.033557	17	0.0340681	5
RREB1	2	0.0229885	23	0.0559611	48	0.0442804	24	0.0808081	2	0.0555556	7	0.0117845	5	0.0274725	4	0.00683761	15	0.0286807	2	0.0307692	17	0.0332031	13	0.0252918	32	0.0860215	16	0.0282686	15	0.0308008	6	0.0689655	10	0.017094	5	0.0271739	17	0.034413	12	0.0470588	44	0.0995475	7	0.0159091	5	0.033557	20	0.0400802	10
S100A9	3	0.0344828	34	0.0827251	45	0.0415129	21	0.0707071	1	0.0277778	19	0.0319865	4	0.021978	8	0.0136752	25	0.0478011	6	0.0923077	9	0.0175781	13	0.0252918	1	0.00268817	22	0.0388693	18	0.036961	1	0.0114943	15	0.025641	6	0.0326087	14	0.0283401	6	0.0235294	15	0.0339367	7	0.0159091	7	0.0469799	11	0.0220441	5
SCNN1B	2	0.0229885	17	0.0413625	78	0.0719557	14	0.047138	3	0.0833333	12	0.020202	3	0.0164835	8	0.0136752	24	0.0458891	3	0.0461538	5	0.00976562	13	0.0252918	1	0.00268817	18	0.0318021	21	0.0431211	5	0.0574713	11	0.0188034	4	0.0217391	15	0.0303644	2	0.00784314	11	0.0248869	7	0.0159091	5	0.033557	13	0.0260521	5
SCNN1G	5	0.0574713	66	0.160584	207	0.190959	51	0.171717	9	0.25	94	0.158249	26	0.142857	9	0.0153846	71	0.135755	9	0.138462	34	0.0664062	47	0.0914397	148	0.397849	124	0.219081	73	0.149897	6	0.0689655	91	0.155556	23	0.125	83	0.168016	22	0.0862745	77	0.174208	100	0.227273	28	0.187919	16	0.0320641	14
SCRIB	13	0.149425	18	0.0437956	64	0.0590406	20	0.0673401	1	0.0277778	25	0.0420875	8	0.043956	5	0.00854701	30	0.0573614	1	0.0153846	20	0.0390625	16	0.0311284	25	0.0672043	34	0.0600707	24	0.0492813	5	0.0574713	26	0.0444444	8	0.0434783	26	0.0526316	3	0.0117647	8	0.0180995	16	0.0363636	11	0.0738255	14	0.0280561	6
SDC1	6	0.0689655	50	0.121655	82	0.0756458	23	0.0774411	3	0.0833333	77	0.12963	29	0.159341	6	0.0102564	35	0.0669216	3	0.0461538	24	0.046875	25	0.0486381	24	0.0645161	38	0.0671378	26	0.0533881	2	0.0229885	17	0.0290598	12	0.0652174	29	0.0587045	12	0.0470588	20	0.0452489	56	0.127273	17	0.114094	9	0.0180361	8
SDC4	5	0.0574713	11	0.026764	23	0.0212177	11	0.037037	1	0.0277778	24	0.040404	7	0.0384615	5	0.00854701	27	0.0516252	6	0.0923077	27	0.0527344	7	0.0136187	6	0.016129	17	0.0300353	12	0.0246407	5	0.0574713	10	0.017094	4	0.0217391	23	0.0465587	11	0.0431373	9	0.020362	14	0.0318182	7	0.0469799	18	0.0360721	4
SELP	4	0.045977	18	0.0437956	19	0.0175277	14	0.047138	1	0.0277778	21	0.0353535	7	0.0384615	7	0.0119658	34	0.0650096	1	0.0153846	1	0.00195312	26	0.0505837	11	0.0295699	5	0.00883392	21	0.0431211	2	0.0229885	5	0.00854701	6	0.0326087	7	0.01417	9	0.0352941	12	0.0271493	20	0.0454545	17	0.114094	11	0.0220441	2
SERPINA10	1	0.0114943	10	0.0243309	24	0.0221402	11	0.037037	2	0.0555556	6	0.010101	9	0.0494505	4	0.00683761	19	0.0363289	1	0.0153846	15	0.0292969	12	0.0233463	5	0.0134409	7	0.0123675	13	0.026694	4	0.045977	26	0.0444444	8	0.0434783	8	0.0161943	10	0.0392157	2	0.00452489	7	0.0159091	1	0.00671141	16	0.0320641	1
SERPINB2	2	0.0229885	10	0.0243309	57	0.052583	14	0.047138	3	0.0833333	10	0.016835	10	0.0549451	11	0.0188034	12	0.0229446	2	0.0307692	9	0.0175781	3	0.00583658	43	0.115591	21	0.0371025	1	0.00205339	7	0.0804598	7	0.0119658	10	0.0543478	11	0.0222672	1	0.00392157	12	0.0271493	14	0.0318182	11	0.0738255	7	0.0140281	14
SERPINC1	2	0.0229885	10	0.0243309	21	0.0193727	4	0.013468	1	0.0277778	22	0.037037	9	0.0494505	2	0.0034188	20	0.0382409	5	0.0769231	1	0.00195312	14	0.0272374	12	0.0322581	12	0.0212014	24	0.0492813	1	0.0114943	4	0.00683761	3	0.0163043	6	0.0121457	4	0.0156863	3	0.00678733	21	0.0477273	8	0.0536913	10	0.0200401	5
SERPIND1	6	0.0689655	11	0.026764	25	0.0230627	14	0.047138	2	0.0555556	25	0.0420875	18	0.0989011	17	0.0290598	24	0.0458891	5	0.0769231	32	0.0625	15	0.0291829	15	0.0403226	17	0.0300353	26	0.0533881	4	0.045977	5	0.00854701	11	0.0597826	21	0.0425101	9	0.0352941	4	0.00904977	7	0.0159091	17	0.114094	21	0.0420842	3
SERPINE1	15	0.172414	11	0.026764	47	0.0433579	4	0.013468	4	0.111111	32	0.0538721	10	0.0549451	8	0.0136752	20	0.0382409	5	0.0769231	18	0.0351562	18	0.0350195	16	0.0430108	22	0.0388693	26	0.0533881	5	0.0574713	8	0.0136752	7	0.0380435	18	0.0364372	5	0.0196078	25	0.0565611	16	0.0363636	11	0.0738255	21	0.0420842	6
SERPINE2	3	0.0344828	9	0.0218978	8	0.00738007	10	0.03367	1	0.0277778	22	0.037037	5	0.0274725	9	0.0153846	24	0.0458891	2	0.0307692	23	0.0449219	25	0.0486381	9	0.0241935	16	0.0282686	12	0.0246407	4	0.045977	22	0.0376068	4	0.0217391	19	0.0384615	5	0.0196078	10	0.0226244	8	0.0181818	16	0.107383	17	0.0340681	1
SERPINF2	2	0.0229885	18	0.0437956	42	0.0387454	13	0.043771	2	0.0555556	32	0.0538721	5	0.0274725	8	0.0136752	21	0.040153	1	0.0153846	28	0.0546875	23	0.0447471	16	0.0430108	14	0.024735	13	0.026694	8	0.091954	17	0.0290598	8	0.0434783	24	0.048583	12	0.0470588	18	0.040724	19	0.0431818	4	0.0268456	24	0.0480962	5
SERPING1	5	0.0574713	21	0.0510949	39	0.0359779	16	0.0538721	1	0.0277778	8	0.013468	7	0.0384615	6	0.0102564	21	0.040153	4	0.0615385	18	0.0351562	18	0.0350195	12	0.0322581	12	0.0212014	21	0.0431211	3	0.0344828	16	0.0273504	4	0.0217391	26	0.0526316	13	0.0509804	23	0.0520362	21	0.0477273	13	0.0872483	19	0.0380762	8
SH2B3	4	0.045977	15	0.0364964	8	0.00738007	3	0.010101	5	0.138889	32	0.0538721	13	0.0714286	21	0.0358974	9	0.0172084	4	0.0615385	36	0.0703125	4	0.0077821	21	0.0564516	8	0.0141343	19	0.0390144	1	0.0114943	7	0.0119658	15	0.0815217	25	0.0506073	2	0.00784314	1	0.00226244	30	0.0681818	2	0.0134228	5	0.01002	5
SHH	5	0.0574713	5	0.0121655	11	0.0101476	2	0.00673401	3	0.0833333	10	0.016835	2	0.010989	5	0.00854701	7	0.0133843	8	0.123077	12	0.0234375	9	0.0175097	1	0.00268817	12	0.0212014	1	0.00205339	3	0.0344828	3	0.00512821	6	0.0326087	23	0.0465587	4	0.0156863	7	0.0158371	12	0.0272727	9	0.0604027	15	0.0300601	2
SLC11A1	8	0.091954	13	0.0316302	10	0.00922509	10	0.03367	3	0.0833333	11	0.0185185	4	0.021978	4	0.00683761	21	0.040153	8	0.123077	24	0.046875	23	0.0447471	11	0.0295699	24	0.0424028	37	0.0759754	2	0.0229885	5	0.00854701	7	0.0380435	17	0.034413	13	0.0509804	6	0.0135747	19	0.0431818	7	0.0469799	25	0.0501002	2
SLC12A2	2	0.0229885	12	0.0291971	55	0.050738	14	0.047138	2	0.0555556	26	0.043771	2	0.010989	6	0.0102564	17	0.0325048	4	0.0615385	16	0.03125	12	0.0233463	2	0.00537634	18	0.0318021	11	0.0225873	1	0.0114943	17	0.0290598	5	0.0271739	26	0.0526316	15	0.0588235	15	0.0339367	11	0.025	6	0.0402685	12	0.0240481	6
SLC4A1	3	0.0344828	12	0.0291971	45	0.0415129	10	0.03367	1	0.0277778	23	0.0387205	15	0.0824176	8	0.0136752	19	0.0363289	3	0.0461538	26	0.0507812	22	0.0428016	10	0.0268817	24	0.0424028	9	0.0184805	5	0.0574713	10	0.017094	11	0.0597826	20	0.0404858	12	0.0470588	4	0.00904977	12	0.0272727	3	0.0201342	24	0.0480962	8
SLC7A11	6	0.0689655	20	0.0486618	32	0.0295203	16	0.0538721	1	0.0277778	18	0.030303	13	0.0714286	5	0.00854701	33	0.0630975	1	0.0153846	24	0.046875	16	0.0311284	20	0.0537634	15	0.0265018	26	0.0533881	6	0.0689655	15	0.025641	9	0.048913	17	0.034413	28	0.109804	9	0.020362	19	0.0431818	6	0.0402685	20	0.0400802	7
SMAD3	3	0.0344828	21	0.0510949	59	0.054428	15	0.0505051	2	0.0555556	7	0.0117845	5	0.0274725	15	0.025641	24	0.0458891	5	0.0769231	17	0.0332031	15	0.0291829	7	0.0188172	21	0.0371025	30	0.0616016	3	0.0344828	10	0.017094	3	0.0163043	18	0.0364372	15	0.0588235	18	0.040724	12	0.0272727	1	0.00671141	12	0.0240481	1
SMAD4	1	0.0114943	12	0.0291971	15	0.0138376	9	0.030303	0	0	18	0.030303	5	0.0274725	2	0.0034188	18	0.0344168	5	0.0769231	9	0.0175781	8	0.0155642	14	0.0376344	20	0.0353357	21	0.0431211	4	0.045977	4	0.00683761	1	0.00543478	22	0.0445344	7	0.027451	1	0.00226244	19	0.0431818	9	0.0604027	8	0.0160321	1
SMOC2	3	0.0344828	29	0.0705596	42	0.0387454	16	0.0538721	1	0.0277778	21	0.0353535	11	0.0604396	9	0.0153846	64	0.122371	2	0.0307692	21	0.0410156	22	0.0428016	29	0.077957	22	0.0388693	32	0.0657084	7	0.0804598	16	0.0273504	17	0.0923913	14	0.0283401	20	0.0784314	50	0.113122	10	0.0227273	4	0.0268456	12	0.0240481	5
SNAI2	2	0.0229885	19	0.0462287	66	0.0608856	18	0.0606061	2	0.0555556	24	0.040404	18	0.0989011	4	0.00683761	36	0.0688337	1	0.0153846	23	0.0449219	18	0.0350195	20	0.0537634	33	0.0583039	32	0.0657084	4	0.045977	31	0.0529915	6	0.0326087	22	0.0445344	6	0.0235294	70	0.158371	19	0.0431818	4	0.0268456	12	0.0240481	4
SRF	8	0.091954	32	0.0778589	82	0.0756458	26	0.0875421	4	0.111111	92	0.154882	25	0.137363	13	0.0222222	30	0.0573614	5	0.0769231	25	0.0488281	16	0.0311284	28	0.0752688	33	0.0583039	42	0.0862423	3	0.0344828	34	0.0581197	12	0.0652174	20	0.0404858	10	0.0392157	33	0.0746606	81	0.184091	4	0.0268456	19	0.0380762	4
SRSF6	3	0.0344828	22	0.053528	65	0.0599631	10	0.03367	4	0.111111	23	0.0387205	10	0.0549451	7	0.0119658	18	0.0344168	2	0.0307692	16	0.03125	23	0.0447471	6	0.016129	24	0.0424028	22	0.0451745	6	0.0689655	11	0.0188034	12	0.0652174	27	0.0546559	9	0.0352941	14	0.0316742	21	0.0477273	3	0.0201342	12	0.0240481	3
ST3GAL4	3	0.0344828	14	0.0340633	26	0.0239852	12	0.040404	0	0	92	0.154882	5	0.0274725	3	0.00512821	18	0.0344168	1	0.0153846	19	0.0371094	20	0.0389105	13	0.0349462	15	0.0265018	6	0.0123203	1	0.0114943	9	0.0153846	7	0.0380435	15	0.0303644	5	0.0196078	27	0.061086	14	0.0318182	4	0.0268456	24	0.0480962	6
STARD13	4	0.045977	16	0.0389294	52	0.0479705	13	0.043771	1	0.0277778	27	0.0454545	17	0.0934066	6	0.0102564	32	0.0611855	2	0.0307692	21	0.0410156	24	0.0466926	20	0.0537634	16	0.0282686	7	0.0143737	2	0.0229885	7	0.0119658	8	0.0434783	27	0.0546559	13	0.0509804	13	0.0294118	35	0.0795455	6	0.0402685	22	0.0440882	10
STXBP1	10	0.114943	14	0.0340633	47	0.0433579	20	0.0673401	2	0.0555556	18	0.030303	4	0.021978	9	0.0153846	18	0.0344168	2	0.0307692	7	0.0136719	20	0.0389105	15	0.0403226	30	0.0530035	14	0.0287474	1	0.0114943	15	0.025641	4	0.0217391	15	0.0303644	8	0.0313725	24	0.0542986	17	0.0386364	10	0.0671141	12	0.0240481	1
STXBP3	2	0.0229885	6	0.0145985	48	0.0442804	4	0.013468	1	0.0277778	33	0.0555556	6	0.032967	5	0.00854701	27	0.0516252	4	0.0615385	19	0.0371094	20	0.0389105	14	0.0376344	16	0.0282686	15	0.0308008	5	0.0574713	9	0.0153846	3	0.0163043	30	0.0607287	9	0.0352941	8	0.0180995	11	0.025	6	0.0402685	13	0.0260521	3
SYK	4	0.045977	26	0.0632603	48	0.0442804	12	0.040404	3	0.0833333	28	0.047138	8	0.043956	7	0.0119658	42	0.0803059	2	0.0307692	14	0.0273438	26	0.0505837	12	0.0322581	25	0.0441696	29	0.0595483	3	0.0344828	12	0.0205128	11	0.0597826	15	0.0303644	17	0.0666667	12	0.0271493	20	0.0454545	6	0.0402685	18	0.0360721	8
SYT11	4	0.045977	17	0.0413625	18	0.0166052	11	0.037037	1	0.0277778	26	0.043771	11	0.0604396	9	0.0153846	14	0.0267686	1	0.0153846	20	0.0390625	15	0.0291829	7	0.0188172	23	0.040636	37	0.0759754	6	0.0689655	42	0.0717949	6	0.0326087	19	0.0384615	10	0.0392157	25	0.0565611	19	0.0431818	9	0.0604027	22	0.0440882	9
SYT7	2	0.0229885	24	0.0583942	42	0.0387454	12	0.040404	2	0.0555556	27	0.0454545	8	0.043956	7	0.0119658	22	0.042065	3	0.0461538	17	0.0332031	23	0.0447471	46	0.123656	23	0.040636	28	0.0574949	4	0.045977	1	0.0017094	5	0.0271739	23	0.0465587	13	0.0509804	8	0.0180995	21	0.0477273	8	0.0536913	19	0.0380762	4
SYTL4	6	0.0689655	12	0.0291971	15	0.0138376	9	0.030303	0	0	19	0.0319865	7	0.0384615	7	0.0119658	16	0.0305927	3	0.0461538	16	0.03125	33	0.0642023	12	0.0322581	13	0.0229682	16	0.0328542	2	0.0229885	25	0.042735	7	0.0380435	16	0.0323887	12	0.0470588	17	0.0384615	18	0.0409091	5	0.033557	23	0.0460922	7
TBXA2R	9	0.103448	11	0.026764	20	0.0184502	9	0.030303	5	0.138889	22	0.037037	9	0.0494505	3	0.00512821	16	0.0305927	2	0.0307692	19	0.0371094	11	0.0214008	13	0.0349462	23	0.040636	13	0.026694	5	0.0574713	1	0.0017094	9	0.048913	25	0.0506073	7	0.027451	19	0.0429864	21	0.0477273	6	0.0402685	19	0.0380762	1
TFPI	2	0.0229885	20	0.0486618	25	0.0230627	13	0.043771	1	0.0277778	13	0.0218855	9	0.0494505	12	0.0205128	9	0.0172084	2	0.0307692	25	0.0488281	30	0.0583658	22	0.0591398	27	0.0477032	26	0.0533881	2	0.0229885	6	0.0102564	5	0.0271739	12	0.0242915	11	0.0431373	15	0.0339367	9	0.0204545	10	0.0671141	21	0.0420842	4
TFPI2	3	0.0344828	11	0.026764	26	0.0239852	15	0.0505051	1	0.0277778	29	0.0488215	2	0.010989	17	0.0290598	14	0.0267686	5	0.0769231	8	0.015625	9	0.0175097	10	0.0268817	18	0.0318021	21	0.0431211	1	0.0114943	4	0.00683761	6	0.0326087	23	0.0465587	16	0.0627451	14	0.0316742	8	0.0181818	6	0.0402685	8	0.0160321	4
TGFB1	4	0.045977	10	0.0243309	18	0.0166052	14	0.047138	4	0.111111	35	0.0589226	9	0.0494505	6	0.0102564	23	0.0439771	4	0.0615385	20	0.0390625	14	0.0272374	23	0.061828	17	0.0300353	31	0.063655	6	0.0689655	15	0.025641	4	0.0217391	28	0.0566802	19	0.0745098	15	0.0339367	17	0.0386364	4	0.0268456	16	0.0320641	6
TGFB2	4	0.045977	8	0.0194647	34	0.0313653	17	0.0572391	5	0.138889	22	0.037037	8	0.043956	9	0.0153846	24	0.0458891	10	0.153846	16	0.03125	32	0.0622568	15	0.0403226	30	0.0530035	32	0.0657084	4	0.045977	26	0.0444444	7	0.0380435	27	0.0546559	9	0.0352941	29	0.0656109	13	0.0295455	12	0.0805369	25	0.0501002	3
THBD	1	0.0114943	31	0.0754258	36	0.0332103	30	0.10101	3	0.0833333	13	0.0218855	5	0.0274725	7	0.0119658	32	0.0611855	3	0.0461538	24	0.046875	11	0.0214008	15	0.0403226	22	0.0388693	57	0.117043	5	0.0574713	12	0.0205128	10	0.0543478	17	0.034413	17	0.0666667	12	0.0271493	20	0.0454545	5	0.033557	17	0.0340681	9
THBS1	2	0.0229885	10	0.0243309	47	0.0433579	18	0.0606061	2	0.0555556	19	0.0319865	10	0.0549451	10	0.017094	26	0.0497132	3	0.0461538	18	0.0351562	2	0.00389105	12	0.0322581	17	0.0300353	11	0.0225873	4	0.045977	4	0.00683761	8	0.0434783	22	0.0445344	14	0.054902	13	0.0294118	14	0.0318182	5	0.033557	14	0.0280561	3
TIMP1	5	0.0574713	13	0.0316302	25	0.0230627	13	0.043771	1	0.0277778	25	0.0420875	5	0.0274725	6	0.0102564	20	0.0382409	1	0.0153846	26	0.0507812	12	0.0233463	16	0.0430108	19	0.0335689	14	0.0287474	3	0.0344828	16	0.0273504	5	0.0271739	15	0.0303644	7	0.027451	21	0.0475113	18	0.0409091	6	0.0402685	10	0.0200401	4
TLR4	3	0.0344828	11	0.026764	31	0.0285978	13	0.043771	1	0.0277778	33	0.0555556	5	0.0274725	7	0.0119658	15	0.0286807	2	0.0307692	14	0.0273438	18	0.0350195	15	0.0403226	25	0.0441696	6	0.0123203	4	0.045977	13	0.0222222	11	0.0597826	17	0.034413	13	0.0509804	15	0.0339367	12	0.0272727	7	0.0469799	25	0.0501002	5
TMEFF2	2	0.0229885	5	0.0121655	1	0.000922509	10	0.03367	1	0.0277778	9	0.0151515	1	0.00549451	11	0.0188034	1	0.00191205	1	0.0153846	4	0.0078125	18	0.0350195	5	0.0134409	7	0.0123675	21	0.0431211	5	0.0574713	13	0.0222222	1	0.00543478	24	0.048583	5	0.0196078	5	0.0113122	13	0.0295455	5	0.033557	2	0.00400802	5
TNF	5	0.0574713	8	0.0194647	57	0.052583	6	0.020202	2	0.0555556	34	0.0572391	6	0.032967	9	0.0153846	14	0.0267686	2	0.0307692	23	0.0449219	11	0.0214008	14	0.0376344	6	0.0106007	5	0.0102669	3	0.0344828	17	0.0290598	7	0.0380435	20	0.0404858	12	0.0470588	6	0.0135747	15	0.0340909	8	0.0536913	13	0.0260521	4
TNFRSF12A	12	0.137931	11	0.026764	62	0.0571956	18	0.0606061	1	0.0277778	28	0.047138	15	0.0824176	6	0.0102564	18	0.0344168	10	0.153846	28	0.0546875	19	0.036965	16	0.0430108	32	0.0565371	17	0.0349076	4	0.045977	6	0.0102564	8	0.0434783	21	0.0425101	24	0.0941176	17	0.0384615	25	0.0568182	6	0.0402685	18	0.0360721	7
TOR1A	11	0.126437	20	0.0486618	82	0.0756458	28	0.0942761	2	0.0555556	37	0.0622896	20	0.10989	8	0.0136752	62	0.118547	1	0.0153846	23	0.0449219	26	0.0505837	14	0.0376344	28	0.04947	26	0.0533881	3	0.0344828	7	0.0119658	10	0.0543478	42	0.0850202	26	0.101961	16	0.0361991	33	0.075	6	0.0402685	19	0.0380762	5
TPM1	2	0.0229885	9	0.0218978	42	0.0387454	19	0.0639731	1	0.0277778	19	0.0319865	14	0.0769231	4	0.00683761	27	0.0516252	8	0.123077	16	0.03125	12	0.0233463	17	0.0456989	18	0.0318021	20	0.0410678	3	0.0344828	14	0.0239316	5	0.0271739	20	0.0404858	10	0.0392157	13	0.0294118	12	0.0272727	2	0.0134228	16	0.0320641	2
TPSAB1	3	0.0344828	10	0.0243309	52	0.0479705	16	0.0538721	2	0.0555556	32	0.0538721	9	0.0494505	6	0.0102564	27	0.0516252	2	0.0307692	19	0.0371094	13	0.0252918	6	0.016129	21	0.0371025	11	0.0225873	2	0.0229885	8	0.0136752	8	0.0434783	14	0.0283401	1	0.00392157	22	0.0497738	25	0.0568182	9	0.0604027	15	0.0300601	3
TREML1	6	0.0689655	1	0.00243309	28	0.0258303	3	0.010101	1	0.0277778	25	0.0420875	5	0.0274725	11	0.0188034	19	0.0363289	2	0.0307692	26	0.0507812	25	0.0486381	4	0.0107527	7	0.0123675	5	0.0102669	4	0.045977	26	0.0444444	6	0.0326087	21	0.0425101	8	0.0313725	5	0.0113122	8	0.0181818	6	0.0402685	11	0.0220441	7
TRIM72	5	0.0574713	7	0.0170316	28	0.0258303	8	0.026936	1	0.0277778	24	0.040404	8	0.043956	4	0.00683761	11	0.0210325	2	0.0307692	1	0.00195312	26	0.0505837	5	0.0134409	21	0.0371025	18	0.036961	4	0.045977	6	0.0102564	4	0.0217391	7	0.01417	6	0.0235294	2	0.00452489	16	0.0363636	1	0.00671141	4	0.00801603	5
TSPAN32	1	0.0114943	12	0.0291971	26	0.0239852	6	0.020202	4	0.111111	27	0.0454545	12	0.0659341	9	0.0153846	17	0.0325048	3	0.0461538	12	0.0234375	23	0.0447471	21	0.0564516	15	0.0265018	14	0.0287474	6	0.0689655	15	0.025641	9	0.048913	22	0.0445344	9	0.0352941	3	0.00678733	22	0.05	7	0.0469799	13	0.0260521	2
TSPAN8	4	0.045977	6	0.0145985	31	0.0285978	2	0.00673401	1	0.0277778	9	0.0151515	2	0.010989	10	0.017094	3	0.00573614	7	0.107692	29	0.0566406	23	0.0447471	13	0.0349462	17	0.0300353	15	0.0308008	5	0.0574713	11	0.0188034	7	0.0380435	25	0.0506073	3	0.0117647	15	0.0339367	12	0.0272727	5	0.033557	21	0.0420842	9
TXK	6	0.0689655	19	0.0462287	18	0.0166052	15	0.0505051	1	0.0277778	10	0.016835	1	0.00549451	6	0.0102564	17	0.0325048	2	0.0307692	26	0.0507812	9	0.0175097	7	0.0188172	18	0.0318021	11	0.0225873	5	0.0574713	14	0.0239316	4	0.0217391	20	0.0404858	9	0.0352941	12	0.0271493	11	0.025	2	0.0134228	12	0.0240481	5
TYRO3	3	0.0344828	4	0.00973236	54	0.0498155	16	0.0538721	2	0.0555556	21	0.0353535	4	0.021978	3	0.00512821	27	0.0516252	4	0.0615385	17	0.0332031	18	0.0350195	13	0.0349462	9	0.0159011	29	0.0595483	4	0.045977	7	0.0119658	4	0.0217391	23	0.0465587	7	0.027451	26	0.0588235	25	0.0568182	11	0.0738255	23	0.0460922	2
UBASH3A	6	0.0689655	16	0.0389294	37	0.0341328	12	0.040404	1	0.0277778	22	0.037037	2	0.010989	8	0.0136752	19	0.0363289	1	0.0153846	24	0.046875	24	0.0466926	13	0.0349462	20	0.0353357	11	0.0225873	2	0.0229885	24	0.0410256	4	0.0217391	19	0.0384615	8	0.0313725	14	0.0316742	12	0.0272727	1	0.00671141	24	0.0480962	0
UBASH3B	5	0.0574713	11	0.026764	50	0.0461255	4	0.013468	1	0.0277778	17	0.0286195	6	0.032967	5	0.00854701	16	0.0305927	4	0.0615385	19	0.0371094	26	0.0505837	14	0.0376344	27	0.0477032	15	0.0308008	2	0.0229885	16	0.0273504	13	0.0706522	18	0.0364372	7	0.027451	10	0.0226244	18	0.0409091	4	0.0268456	18	0.0360721	4
VANGL2	5	0.0574713	43	0.104623	255	0.23524	34	0.114478	11	0.305556	54	0.0909091	24	0.131868	6	0.0102564	52	0.0994264	1	0.0153846	35	0.0683594	21	0.040856	24	0.0645161	72	0.127208	62	0.12731	11	0.126437	48	0.0820513	12	0.0652174	14	0.0283401	16	0.0627451	82	0.18552	47	0.106818	19	0.127517	20	0.0400802	13
VEGFA	4	0.045977	17	0.0413625	67	0.0618081	16	0.0538721	2	0.0555556	29	0.0488215	19	0.104396	8	0.0136752	30	0.0573614	1	0.0153846	21	0.0410156	11	0.0214008	25	0.0672043	34	0.0600707	24	0.0492813	4	0.045977	7	0.0119658	8	0.0434783	22	0.0445344	19	0.0745098	15	0.0339367	43	0.0977273	11	0.0738255	19	0.0380762	4
VEGFB	4	0.045977	20	0.0486618	36	0.0332103	14	0.047138	0	0	29	0.0488215	8	0.043956	6	0.0102564	31	0.0592734	5	0.0769231	21	0.0410156	29	0.0564202	13	0.0349462	23	0.040636	31	0.063655	6	0.0689655	13	0.0222222	9	0.048913	19	0.0384615	11	0.0431373	21	0.0475113	19	0.0431818	4	0.0268456	30	0.0601202	3
VIL1	2	0.0229885	5	0.0121655	5	0.00461255	9	0.030303	1	0.0277778	37	0.0622896	4	0.021978	8	0.0136752	14	0.0267686	9	0.138462	23	0.0449219	11	0.0214008	24	0.0645161	35	0.0618375	9	0.0184805	1	0.0114943	6	0.0102564	10	0.0543478	3	0.00607287	3	0.0117647	9	0.020362	27	0.0613636	11	0.0738255	1	0.00200401	2
VKORC1	20	0.229885	20	0.0486618	64	0.0590406	19	0.0639731	2	0.0555556	22	0.037037	8	0.043956	9	0.0153846	24	0.0458891	4	0.0615385	28	0.0546875	20	0.0389105	12	0.0322581	41	0.0724382	21	0.0431211	8	0.091954	12	0.0205128	7	0.0380435	20	0.0404858	12	0.0470588	32	0.0723982	26	0.0590909	6	0.0402685	24	0.0480962	6
VPS33B	6	0.0689655	15	0.0364964	81	0.0747232	31	0.104377	1	0.0277778	22	0.037037	19	0.104396	7	0.0119658	33	0.0630975	4	0.0615385	21	0.0410156	19	0.036965	25	0.0672043	28	0.04947	45	0.0924025	6	0.0689655	24	0.0410256	10	0.0543478	13	0.0263158	34	0.133333	48	0.108597	55	0.125	11	0.0738255	22	0.0440882	6
VWF	1	0.0114943	14	0.0340633	25	0.0230627	7	0.023569	2	0.0555556	21	0.0353535	7	0.0384615	3	0.00512821	26	0.0497132	4	0.0615385	18	0.0351562	18	0.0350195	16	0.0430108	18	0.0318021	15	0.0308008	1	0.0114943	5	0.00854701	8	0.0434783	23	0.0465587	17	0.0666667	9	0.020362	17	0.0386364	0	0	19	0.0380762	7
WFDC1	19	0.218391	20	0.0486618	11	0.0101476	12	0.040404	3	0.0833333	31	0.0521886	18	0.0989011	8	0.0136752	17	0.0325048	3	0.0461538	20	0.0390625	15	0.0291829	14	0.0376344	19	0.0335689	19	0.0390144	2	0.0229885	14	0.0239316	9	0.048913	14	0.0283401	2	0.00784314	10	0.0226244	12	0.0272727	5	0.033557	11	0.0220441	6
WNT3A	1	0.0114943	15	0.0364964	32	0.0295203	16	0.0538721	1	0.0277778	15	0.0252525	15	0.0824176	6	0.0102564	25	0.0478011	2	0.0307692	16	0.03125	6	0.0116732	25	0.0672043	18	0.0318021	21	0.0431211	1	0.0114943	17	0.0290598	3	0.0163043	22	0.0445344	6	0.0235294	27	0.061086	8	0.0181818	10	0.0671141	7	0.0140281	7
WNT4	3	0.0344828	10	0.0243309	33	0.0304428	15	0.0505051	0	0	17	0.0286195	4	0.021978	5	0.00854701	30	0.0573614	2	0.0307692	10	0.0195312	5	0.00972763	20	0.0537634	26	0.0459364	21	0.0431211	3	0.0344828	16	0.0273504	5	0.0271739	18	0.0364372	7	0.027451	20	0.0452489	9	0.0204545	6	0.0402685	26	0.0521042	8
WNT5A	5	0.0574713	15	0.0364964	36	0.0332103	11	0.037037	0	0	13	0.0218855	8	0.043956	11	0.0188034	16	0.0305927	4	0.0615385	7	0.0136719	25	0.0486381	12	0.0322581	19	0.0335689	38	0.0780287	8	0.091954	15	0.025641	14	0.076087	18	0.0364372	16	0.0627451	2	0.00452489	13	0.0295455	9	0.0604027	15	0.0300601	5
WNT7A	1	0.0114943	22	0.053528	4	0.00369004	7	0.023569	0	0	16	0.026936	18	0.0989011	9	0.0153846	30	0.0573614	2	0.0307692	5	0.00976562	17	0.0330739	1	0.00268817	18	0.0318021	22	0.0451745	2	0.0229885	15	0.025641	10	0.0543478	19	0.0384615	4	0.0156863	31	0.0701357	9	0.0204545	9	0.0604027	17	0.0340681	3
XBP1	2	0.0229885	17	0.0413625	23	0.0212177	12	0.040404	2	0.0555556	15	0.0252525	4	0.021978	7	0.0119658	26	0.0497132	6	0.0923077	16	0.03125	21	0.040856	11	0.0295699	18	0.0318021	18	0.036961	1	0.0114943	14	0.0239316	6	0.0326087	19	0.0384615	4	0.0156863	23	0.0520362	17	0.0386364	9	0.0604027	20	0.0400802	4
YAP1	3	0.0344828	17	0.0413625	31	0.0285978	36	0.121212	0	0	25	0.0420875	13	0.0714286	3	0.00512821	54	0.10325	0	0	19	0.0371094	24	0.0466926	19	0.0510753	38	0.0671378	27	0.0554415	7	0.0804598	25	0.042735	7	0.0380435	13	0.0263158	14	0.054902	23	0.0520362	19	0.0431818	2	0.0134228	14	0.0280561	9
[truncated: 8 more columns]

## Sheet: ST7
Supplementary Table 7. Mean frequency of mRNA low alteration per TCGA Pan-Cancer type
Genes	ACC		BLCA		BRCA		CESC		CHOL		COAD		ESCA		GBM		HNSC		KICH		KIRC		LGG		LIHC		LUAD		LUSC		MESO		OV		PAAD		PRAD		SARC		SKCM		STAD		TGCT		THCA		THYM
	N = 87	f	N = 411	f	N = 1084	f	N = 297	f	N = 36	f	N = 594	f	N = 182	f	N = 585	f	N = 523	f	N = 65	f	N = 512	f	N = 514	f	N = 372	f	N = 566	f	N = 487	f	N = 87	f	N = 585	f	N = 184	f	N = 494	f	N = 255	f	N = 442	f	N = 440	f	N = 149	f	N = 499	f	N = 123
ABAT	0	0	0	0	0	0	0	0	0	0	0	0	0	0	0	0	0	0	0	0	0	0	1	0.00194553	0	0	0	0	0	0	0	0	0	0	0	0	0	0	0	0	0	0	0	0	0	0	0	0	0
ABCC8	0	0	0	0	0	0	0	0	0	0	0	0	0	0	0	0	0	0	0	0	0	0	0	0	0	0	0	0	0	0	0	0	0	0	0	0	0	0	0	0	0	0	0	0	0	0	0	0	0
ACTA2	0	0	0	0	0	0	0	0	0	0	0	0	0	0	0	0	0	0	0	0	0	0	0	0	0	0	0	0	0	0	0	0	0	0	0	0	0	0	0	0	0	0	0	0	0	0	0	0	0
ACTG1	0	0	3	0.00729927	7	0.00645756	3	0.010101	0	0	0	0	1	0.00549451	0	0	2	0.00382409	0	0	3	0.00585938	2	0.00389105	0	0	2	0.00353357	1	0.00205339	3	0.0344828	2	0.0034188	2	0.0108696	0	0	0	0	0	0	0	0	1	0.00671141	2	0.00400802	0
ACVRL1	0	0	0	0	0	0	0	0	0	0	0	0	0	0	0	0	0	0	0	0	0	0	0	0	0	0	0	0	0	0	0	0	0	0	0	0	0	0	0	0	0	0	0	0	0	0	0	0	0
ADAMTS13	0	0	0	0	0	0	0	0	0	0	0	0	0	0	0	0	0	0	0	0	0	0	0	0	0	0	0	0	0	0	0	0	0	0	0	0	0	0	0	0	0	0	0	0	0	0	0	0	0
ADAMTS18	0	0	0	0	0	0	0	0	0	0	0	0	0	0	0	0	0	0	0	0	0	0	0	0	0	0	0	0	0	0	0	0	0	0	0	0	0	0	0	0	0	0	0	0	0	0	0	0	0
ADIPOR2	0	0	0	0	0	0	18	0.0606061	0	0	9	0.0151515	0	0	1	0.0017094	6	0.0114723	0	0	0	0	0	0	0	0	2	0.00353357	5	0.0102669	2	0.0229885	14	0.0239316	4	0.0217391	22	0.0445344	14	0.054902	0	0	2	0.00454545	0	0	1	0.00200401	3
ADRA2A	0	0	0	0	0	0	0	0	0	0	0	0	0	0	0	0	0	0	0	0	0	0	0	0	0	0	0	0	0	0	0	0	0	0	0	0	0	0	0	0	0	0	0	0	0	0	0	0	0
ADRA2C	0	0	0	0	0	0	0	0	0	0	0	0	0	0	0	0	0	0	0	0	0	0	0	0	0	0	0	0	0	0	0	0	0	0	0	0	0	0	0	0	0	0	0	0	0	0	0	0	0
ADRB1	0	0	0	0	0	0	0	0	0	0	0	0	0	0	0	0	0	0	0	0	0	0	0	0	0	0	0	0	0	0	0	0	0	0	0	0	0	0	0	0	0	0	0	0	0	0	0	0	0
ADRB2	0	0	0	0	0	0	0	0	0	0	0	0	0	0	0	0	0	0	0	0	0	0	0	0	0	0	0	0	0	0	0	0	0	0	0	0	0	0	0	0	0	0	0	0	0	0	0	0	0
ADTRP	0	0	0	0	0	0	0	0	0	0	0	0	0	0	0	0	0	0	0	0	0	0	0	0	0	0	0	0	0	0	0	0	0	0	0	0	0	0	0	0	0	0	0	0	0	0	0	0	0
AGER	0	0	0	0	0	0	0	0	0	0	0	0	0	0	0	0	0	0	0	0	0	0	0	0	0	0	0	0	0	0	0	0	0	0	0	0	0	0	0	0	0	0	0	0	0	0	0	0	0
AHNAK2	0	0	0	0	0	0	0	0	0	0	0	0	0	0	0	0	0	0	0	0	0	0	0	0	0	0	0	0	0	0	0	0	0	0	0	0	0	0	0	0	0	0	0	0	0	0	0	0	0
AJAP1	0	0	0	0	0	0	0	0	0	0	0	0	0	0	0	0	0	0	11	0.169231	0	0	0	0	0	0	0	0	0	0	0	0	0	0	0	0	0	0	0	0	0	0	0	0	0	0	0	0	0
AJUBA	0	0	0	0	0	0	0	0	0	0	0	0	0	0	0	0	0	0	0	0	8	0.015625	0	0	0	0	0	0	0	0	0	0	0	0	0	0	0	0	0	0	0	0	0	0	0	0	1	0.00200401	0
ALOX12	0	0	0	0	0	0	0	0	0	0	0	0	0	0	0	0	0	0	0	0	0	0	0	0	0	0	0	0	0	0	0	0	0	0	0	0	0	0	0	0	0	0	0	0	0	0	0	0	0
ALOX15	0	0	0	0	0	0	0	0	0	0	0	0	0	0	1	0.0017094	0	0	1	0.0153846	0	0	0	0	0	0	0	0	0	0	1	0.0114943	0	0	0	0	0	0	0	0	0	0	0	0	0	0	0	0	0
ALOX5	0	0	0	0	0	0	0	0	0	0	0	0	0	0	0	0	0	0	0	0	0	0	0	0	0	0	0	0	0	0	0	0	0	0	0	0	0	0	0	0	0	0	0	0	0	0	0	0	0
ANO6	0	0	0	0	3	0.00276753	0	0	0	0	15	0.0252525	0	0	0	0	0	0	0	0	4	0.0078125	0	0	0	0	1	0.00176678	0	0	0	0	3	0.00512821	8	0.0434783	0	0	0	0	0	0	0	0	0	0	0	0	0
ANXA1	0	0	0	0	0	0	0	0	0	0	0	0	0	0	0	0	0	0	0	0	0	0	0	0	0	0	0	0	0	0	1	0.0114943	0	0	0	0	0	0	0	0	0	0	0	0	0	0	0	0	0
ANXA2	0	0	0	0	0	0	2	0.00673401	0	0	0	0	0	0	0	0	1	0.00191205	0	0	0	0	0	0	0	0	0	0	0	0	1	0.0114943	0	0	1	0.00543478	0	0	0	0	0	0	0	0	0	0	0	0	0
ANXA5	0	0	0	0	9	0.00830258	1	0.003367	2	0.0555556	0	0	1	0.00549451	0	0	0	0	0	0	4	0.0078125	0	0	0	0	1	0.00176678	3	0.00616016	1	0.0114943	1	0.0017094	5	0.0271739	4	0.00809717	0	0	0	0	0	0	0	0	9	0.0180361	0
ANXA6	0	0	0	0	14	0.0129151	0	0	0	0	0	0	0	0	0	0	0	0	0	0	4	0.0078125	0	0	0	0	0	0	0	0	0	0	0	0	0	0	0	0	0	0	0	0	0	0	0	0	0	0	4
ANXA8	0	0	0	0	0	0	0	0	0	0	0	0	0	0	0	0	0	0	0	0	0	0	0	0	0	0	0	0	0	0	0	0	0	0	0	0	0	0	0	0	0	0	0	0	0	0	0	0	0
AP3B1	0	0	14	0.0340633	49	0.045203	21	0.0707071	2	0.0555556	35	0.0589226	9	0.0494505	3	0.00512821	23	0.0439771	1	0.0153846	8	0.015625	7	0.0136187	7	0.0188172	34	0.0600707	11	0.0225873	3	0.0344828	18	0.0307692	13	0.0706522	33	0.0668016	3	0.0117647	33	0.0746606	12	0.0272727	4	0.0268456	11	0.0220441	4
APOE	0	0	0	0	0	0	0	0	0	0	0	0	0	0	0	0	0	0	0	0	0	0	0	0	0	0	0	0	0	0	0	0	0	0	0	0	0	0	0	0	0	0	0	0	0	0	0	0	0
APOH	0	0	0	0	0	0	0	0	0	0	0	0	0	0	0	0	0	0	0	0	0	0	0	0	0	0	0	0	0	0	0	0	0	0	0	0	0	0	0	0	0	0	0	0	0	0	0	0	0
AQP1	0	0	0	0	0	0	0	0	0	0	0	0	0	0	0	0	0	0	0	0	0	0	0	0	0	0	0	0	0	0	0	0	0	0	0	0	0	0	0	0	0	0	0	0	0	0	0	0	0
ARFGEF1	0	0	0	0	0	0	1	0.003367	0	0	12	0.020202	0	0	3	0.00512821	3	0.00573614	2	0.0307692	0	0	14	0.0272374	0	0	3	0.00530035	6	0.0123203	2	0.0229885	4	0.00683761	2	0.0108696	3	0.00607287	4	0.0156863	21	0.0475113	2	0.00454545	0	0	5	0.01002	1
ARHGAP24	0	0	0	0	0	0	0	0	0	0	0	0	0	0	0	0	0	0	0	0	5	0.00976562	0	0	0	0	0	0	0	0	0	0	0	0	0	0	0	0	0	0	0	0	0	0	0	0	0	0	0
ARHGAP35	1	0.0114943	0	0	6	0.00553506	6	0.020202	1	0.0277778	13	0.0218855	3	0.0164835	1	0.0017094	6	0.0114723	0	0	5	0.00976562	29	0.0564202	4	0.0107527	6	0.0106007	9	0.0184805	1	0.0114943	19	0.0324786	3	0.0163043	0	0	2	0.00784314	2	0.00452489	7	0.0159091	0	0	2	0.00400802	0
ARHGEF19	0	0	0	0	0	0	0	0	0	0	0	0	0	0	0	0	0	0	0	0	0	0	0	0	0	0	0	0	0	0	0	0	0	0	0	0	0	0	0	0	0	0	0	0	0	0	2	0.00400802	0
AXL	0	0	0	0	0	0	0	0	0	0	0	0	0	0	0	0	0	0	0	0	0	0	0	0	0	0	0	0	0	0	0	0	0	0	0	0	0	0	0	0	0	0	0	0	0	0	0	0	0
B4GALT1	0	0	0	0	0	0	0	0	0	0	2	0.003367	0	0	0	0	0	0	2	0.0307692	0	0	0	0	5	0.0134409	0	0	0	0	0	0	0	0	4	0.0217391	13	0.0263158	0	0	0	0	0	0	0	0	2	0.00400802	0
BLK	0	0	0	0	0	0	0	0	0	0	0	0	0	0	0	0	0	0	0	0	0	0	0	0	0	0	0	0	0	0	0	0	0	0	0	0	0	0	0	0	0	0	0	0	0	0	0	0	0
BLOC1S3	0	0	2	0.00486618	3	0.00276753	1	0.003367	0	0	6	0.010101	0	0	4	0.00683761	0	0	0	0	3	0.00585938	44	0.0856031	0	0	7	0.0123675	6	0.0123203	4	0.045977	17	0.0290598	0	0	3	0.00607287	8	0.0313725	0	0	0	0	0	0	7	0.0140281	1
BLOC1S4	0	0	5	0.0121655	7	0.00645756	25	0.0841751	0	0	2	0.003367	4	0.021978	0	0	3	0.00573614	0	0	5	0.00976562	3	0.00583658	0	0	0	0	1	0.00205339	6	0.0689655	19	0.0324786	1	0.00543478	6	0.0121457	8	0.0313725	15	0.0339367	0	0	0	0	8	0.0160321	0
BLOC1S6	4	0.045977	8	0.0194647	68	0.0627306	24	0.0808081	0	0	15	0.0252525	1	0.00549451	0	0	3	0.00573614	1	0.0153846	8	0.015625	12	0.0233463	7	0.0188172	12	0.0212014	4	0.00821355	11	0.126437	29	0.0495726	3	0.0163043	5	0.0101215	12	0.0470588	21	0.0475113	15	0.0340909	1	0.00671141	18	0.0360721	7
BNC1	0	0	0	0	0	0	0	0	0	0	0	0	0	0	0	0	0	0	0	0	0	0	0	0	0	0	0	0	0	0	0	0	0	0	0	0	0	0	0	0	0	0	0	0	0	0	0	0	0
C1GALT1C1	1	0.0114943	2	0.00486618	4	0.00369004	2	0.00673401	2	0.0555556	0	0	0	0	0	0	0	0	0	0	1	0.00195312	1	0.00194553	2	0.00537634	2	0.00353357	0	0	0	0	0	0	3	0.0163043	9	0.0182186	0	0	6	0.0135747	0	0	3	0.0201342	9	0.0180361	2
C1QTNF1	0	0	0	0	0	0	0	0	0	0	0	0	0	0	0	0	0	0	0	0	0	0	0	0	0	0	0	0	0	0	0	0	0	0	0	0	0	0	0	0	0	0	0	0	0	0	0	0	0
C3	0	0	0	0	0	0	0	0	0	0	0	0	0	0	0	0	0	0	0	0	0	0	0	0	0	0	0	0	0	0	0	0	0	0	0	0	0	0	0	0	0	0	0	0	0	0	0	0	0
C9	0	0	0	0	0	0	0	0	0	0	0	0	0	0	0	0	0	0	0	0	0	0	0	0	0	0	0	0	0	0	0	0	0	0	0	0	0	0	0	0	0	0	0	0	0	0	0	0	0
CADM4	0	0	0	0	0	0	0	0	0	0	0	0	0	0	6	0.0102564	0	0	2	0.0307692	0	0	28	0.0544747	0	0	0	0	0	0	0	0	0	0	0	0	12	0.0242915	0	0	0	0	0	0	0	0	1	0.00200401	0
CARMIL2	0	0	0	0	0	0	0	0	0	0	0	0	0	0	0	0	0	0	0	0	0	0	0	0	0	0	0	0	0	0	0	0	0	0	0	0	0	0	0	0	0	0	0	0	0	0	0	0	0
CASK	0	0	0	0	0	0	0	0	0	0	1	0.0016835	0	0	0	0	0	0	0	0	0	0	0	0	1	0.00268817	1	0.00176678	1	0.00205339	0	0	6	0.0102564	1	0.00543478	3	0.00607287	0	0	0	0	0	0	0	0	0	0	0
CAV1	0	0	0	0	0	0	0	0	0	0	0	0	0	0	0	0	0	0	0	0	0	0	0	0	0	0	0	0	0	0	0	0	0	0	0	0	0	0	0	0	0	0	0	0	0	0	0	0	0
CAV3	0	0	0	0	0	0	0	0	0	0	0	0	0	0	0	0	0	0	0	0	0	0	0	0	0	0	0	0	0	0	0	0	0	0	0	0	0	0	0	0	0	0	0	0	0	0	0	0	0
CCL2	0	0	0	0	0	0	0	0	0	0	0	0	0	0	0	0	0	0	0	0	0	0	0	0	0	0	0	0	0	0	0	0	0	0	0	0	0	0	0	0	0	0	0	0	0	0	0	0	0
CCM2L	0	0	0	0	0	0	0	0	0	0	0	0	0	0	0	0	0	0	0	0	0	0	0	0	0	0	0	0	0	0	0	0	0	0	0	0	0	0	0	0	0	0	0	0	0	0	0	0	0
CCN1	0	0	0	0	0	0	0	0	0	0	0	0	0	0	0	0	0	0	0	0	0	0	0	0	0	0	0	0	0	0	0	0	0	0	0	0	0	0	0	0	0	0	0	0	0	0	0	0	0
CCN4	0	0	0	0	0	0	0	0	0	0	0	0	0	0	0	0	0	0	0	0	0	0	0	0	0	0	0	0	0	0	0	0	0	0	0	0	0	0	0	0	0	0	0	0	0	0	0	0	0
CCR2	0	0	0	0	0	0	0	0	0	0	0	0	0	0	0	0	0	0	0	0	0	0	0	0	0	0	0	0	0	0	0	0	0	0	0	0	0	0	0	0	0	0	0	0	0	0	0	0	0
CD109	0	0	0	0	0	0	0	0	0	0	3	0.00505051	0	0	0	0	0	0	0	0	0	0	0	0	0	0	0	0	0	0	0	0	0	0	5	0.0271739	16	0.0323887	0	0	0	0	0	0	0	0	9	0.0180361	0
CD151	0	0	0	0	0	0	0	0	0	0	0	0	0	0	0	0	0	0	0	0	0	0	0	0	0	0	0	0	0	0	0	0	0	0	0	0	0	0	0	0	0	0	0	0	0	0	0	0	0
CD34	0	0	0	0	0	0	0	0	0	0	0	0	0	0	0	0	0	0	0	0	0	0	0	0	0	0	0	0	0	0	0	0	0	0	0	0	0	0	0	0	0	0	0	0	0	0	0	0	0
CD36	0	0	0	0	0	0	0	0	0	0	0	0	0	0	0	0	0	0	0	0	0	0	0	0	0	0	0	0	0	0	0	0	0	0	0	0	0	0	0	0	0	0	0	0	0	0	0	0	0
CD40LG	0	0	0	0	0	0	0	0	0	0	4	0.00673401	0	0	0	0	2	0.00382409	0	0	0	0	0	0	0	0	0	0	0	0	0	0	0	0	4	0.0217391	0	0	0	0	0	0	0	0	0	0	7	0.0140281	0
CD44	0	0	0	0	0	0	0	0	0	0	0	0	0	0	0	0	0	0	0	0	0	0	0	0	0	0	0	0	0	0	0	0	0	0	0	0	0	0	0	0	0	0	0	0	0	0	0	0	0
CD9	0	0	1	0.00243309	0	0	2	0.00673401	0	0	0	0	0	0	2	0.0034188	0	0	0	0	1	0.00195312	0	0	0	0	0	0	0	0	0	0	6	0.0102564	0	0	0	0	0	0	0	0	0	0	0	0	0	0	0
CDKN1A	0	0	0	0	0	0	0	0	0	0	0	0	0	0	0	0	0	0	0	0	0	0	0	0	0	0	0	0	0	0	0	0	0	0	0	0	0	0	0	0	0	0	0	0	0	0	0	0	0
CEACAM1	0	0	0	0	0	0	0	0	0	0	0	0	0	0	0	0	0	0	0	0	0	0	0	0	0	0	0	0	0	0	0	0	0	0	0	0	0	0	0	0	0	0	0	0	0	0	0	0	0
CELA2A	0	0	0	0	0	0	0	0	0	0	0	0	0	0	0	0	0	0	0	0	0	0	0	0	0	0	0	0	0	0	0	0	0	0	0	0	0	0	0	0	0	0	0	0	0	0	0	0	0
CELSR1	0	0	0	0	0	0	1	0.003367	0	0	0	0	0	0	0	0	2	0.00382409	0	0	7	0.0136719	0	0	0	0	0	0	0	0	0	0	0	0	0	0	0	0	0	0	0	0	0	0	0	0	2	0.00400802	0
CFH	0	0	0	0	0	0	0	0	0	0	0	0	0	0	0	0	0	0	0	0	0	0	0	0	0	0	0	0	0	0	0	0	0	0	0	0	0	0	0	0	0	0	0	0	0	0	0	0	0
CFLAR	0	0	0	0	0	0	0	0	0	0	0	0	0	0	0	0	1	0.00191205	0	0	6	0.0117188	0	0	3	0.00806452	0	0	0	0	0	0	0	0	5	0.0271739	4	0.00809717	0	0	0	0	0	0	0	0	0	0	0
CLASP1	0	0	7	0.0170316	46	0.0424354	6	0.020202	0	0	11	0.0185185	0	0	0	0	8	0.0152964	0	0	22	0.0429688	9	0.0175097	6	0.016129	17	0.0300353	1	0.00205339	0	0	18	0.0307692	8	0.0434783	33	0.0668016	0	0	0	0	0	0	0	0	15	0.0300601	3
CLASP2	0	0	4	0.00973236	9	0.00830258	16	0.0538721	0	0	23	0.0387205	28	0.153846	0	0	27	0.0516252	1	0.0153846	7	0.0136719	17	0.0330739	2	0.00537634	25	0.0441696	10	0.0205339	5	0.0574713	2	0.0034188	0	0	5	0.0101215	0	0	0	0	2	0.00454545	2	0.0134228	16	0.0320641	3
CLDN1	0	0	0	0	0	0	0	0	0	0	0	0	0	0	0	0	0	0	0	0	0	0	0	0	0	0	0	0	0	0	0	0	0	0	0	0	0	0	0	0	0	0	0	0	0	0	0	0	0
CLDN19	0	0	0	0	0	0	0	0	0	0	0	0	0	0	0	0	0	0	0	0	0	0	0	0	0	0	0	0	0	0	0	0	0	0	0	0	0	0	0	0	0	0	0	0	0	0	0	0	0
CLDN3	0	0	0	0	0	0	0	0	0	0	0	0	0	0	0	0	0	0	1	0.0153846	0	0	0	0	0	0	3	0.00530035	0	0	0	0	3	0.00512821	0	0	0	0	0	0	0	0	0	0	0	0	0	0	0
CLDN4	0	0	0	0	0	0	0	0	0	0	0	0	0	0	0	0	0	0	0	0	0	0	0	0	0	0	0	0	0	0	0	0	0	0	0	0	0	0	0	0	0	0	0	0	0	0	0	0	0
CLEC10A	0	0	0	0	0	0	0	0	0	0	0	0	0	0	0	0	0	0	0	0	0	0	0	0	0	0	0	0	0	0	0	0	0	0	0	0	0	0	0	0	0	0	0	0	0	0	0	0	0
CNN2	0	0	9	0.0218978	0	0	0	0	0	0	9	0.0151515	0	0	0	0	9	0.0172084	0	0	0	0	0	0	0	0	13	0.0229682	5	0.0102669	0	0	0	0	5	0.0271739	0	0	0	0	0	0	2	0.00454545	0	0	14	0.0280561	0
COL1A1	0	0	0	0	0	0	0	0	0	0	0	0	0	0	0	0	0	0	0	0	0	0	0	0	0	0	0	0	0	0	0	0	0	0	0	0	0	0	0	0	0	0	0	0	0	0	0	0	0
COL3A1	0	0	0	0	0	0	0	0	0	0	0	0	0	0	0	0	0	0	0	0	0	0	0	0	0	0	0	0	0	0	0	0	0	0	0	0	0	0	0	0	0	0	0	0	0	0	0	0	0
COL5A1	0	0	0	0	0	0	0	0	0	0	0	0	0	0	0	0	0	0	0	0	0	0	0	0	0	0	0	0	0	0	0	0	0	0	0	0	0	0	0	0	0	0	0	0	0	0	0	0	0
COMP	0	0	0	0	0	0	0	0	0	0	0	0	0	0	0	0	0	0	0	0	0	0	0	0	0	0	0	0	0	0	0	0	0	0	0	0	0	0	0	0	0	0	0	0	0	0	0	0	0
CORO1B	0	0	0	0	0	0	0	0	0	0	1	0.0016835	0	0	2	0.0034188	2	0.00382409	0	0	4	0.0078125	8	0.0155642	2	0.00537634	6	0.0106007	2	0.00410678	1	0.0114943	1	0.0017094	2	0.0108696	0	0	0	0	2	0.00452489	0	0	5	0.033557	5	0.01002	0
CPB2	0	0	0	0	0	0	0	0	0	0	0	0	0	0	0	0	0	0	0	0	0	0	0	0	0	0	0	0	0	0	0	0	0	0	0	0	0	0	0	0	0	0	0	0	0	0	0	0	0
CRK	0	0	0	0	73	0.0673432	2	0.00673401	1	0.0277778	96	0.161616	15	0.0824176	6	0.0102564	7	0.0133843	2	0.0307692	14	0.0273438	14	0.0272374	0	0	10	0.0176678	21	0.0431211	2	0.0229885	45	0.0769231	3	0.0163043	20	0.0404858	3	0.0117647	11	0.0248869	25	0.0568182	0	0	1	0.00200401	0
CRP	0	0	0	0	0	0	0	0	0	0	0	0	0	0	0	0	0	0	0	0	0	0	0	0	0	0	0	0	0	0	0	0	0	0	0	0	0	0	0	0	0	0	0	0	0	0	0	0	0
CX3CL1	0	0	0	0	0	0	0	0	0	0	0	0	0	0	0	0	0	0	0	0	6	0.0117188	0	0	0	0	0	0	0	0	0	0	0	0	0	0	0	0	0	0	0	0	0	0	0	0	0	0	0
CXADR	0	0	0	0	0	0	0	0	0	0	1	0.0016835	0	0	0	0	0	0	0	0	0	0	0	0	0	0	0	0	0	0	0	0	6	0.0102564	0	0	0	0	0	0	0	0	0	0	0	0	0	0	0
CXCR4	0	0	0	0	0	0	0	0	0	0	0	0	0	0	0	0	0	0	0	0	0	0	0	0	0	0	0	0	0	0	0	0	0	0	0	0	0	0	0	0	0	0	0	0	0	0	0	0	0
DCBLD2	0	0	0	0	0	0	0	0	0	0	0	0	0	0	0	0	0	0	0	0	0	0	0	0	0	0	0	0	0	0	0	0	0	0	0	0	7	0.01417	0	0	0	0	0	0	0	0	0	0	0
DDR1	0	0	0	0	3	0.00276753	4	0.013468	0	0	3	0.00505051	1	0.00549451	5	0.00854701	3	0.00573614	6	0.0923077	2	0.00390625	12	0.0233463	0	0	2	0.00353357	2	0.00410678	0	0	3	0.00512821	2	0.0108696	13	0.0263158	0	0	0	0	0	0	0	0	12	0.0240481	0
DMTN	0	0	0	0	0	0	0	0	0	0	7	0.0117845	0	0	0	0	0	0	3	0.0461538	1	0.00195312	0	0	0	0	1	0.00176678	0	0	0	0	0	0	0	0	71	0.143725	0	0	0	0	0	0	0	0	3	0.00601202	0
DRD5	0	0	0	0	0	0	0	0	0	0	0	0	0	0	0	0	0	0	0	0	0	0	0	0	0	0	0	0	0	0	0	0	0	0	0	0	0	0	0	0	0	0	0	0	0	0	0	0	0
DSP	0	0	0	0	0	0	0	0	0	0	7	0.0117845	0	0	0	0	0	0	2	0.0307692	0	0	0	0	0	0	0	0	0	0	0	0	3	0.00512821	1	0.00543478	2	0.00404858	0	0	0	0	0	0	0	0	0	0	0
DST	0	0	0	0	0	0	0	0	0	0	0	0	0	0	0	0	0	0	0	0	0	0	3	0.00583658	0	0	0	0	0	0	0	0	0	0	3	0.0163043	0	0	0	0	0	0	0	0	0	0	0	0	0
DTNBP1	1	0.0114943	0	0	5	0.00461255	1	0.003367	0	0	15	0.0252525	3	0.0164835	3	0.00512821	0	0	0	0	6	0.0117188	4	0.0077821	0	0	4	0.00706714	7	0.0143737	0	0	8	0.0136752	0	0	3	0.00607287	0	0	2	0.00452489	8	0.0181818	1	0.00671141	0	0	0
DUOX1	0	0	0	0	0	0	0	0	0	0	0	0	0	0	0	0	0	0	0	0	0	0	0	0	0	0	0	0	0	0	0	0	0	0	0	0	0	0	0	0	0	0	0	0	0	0	0	0	0
DUOX2	0	0	0	0	0	0	0	0	0	0	0	0	0	0	0	0	0	0	0	0	0	0	0	0	0	0	0	0	0	0	0	0	0	0	0	0	0	0	0	0	0	0	0	0	0	0	0	0	0
DUSP10	0	0	0	0	0	0	0	0	0	0	0	0	0	0	0	0	0	0	0	0	0	0	0	0	0	0	0	0	0	0	0	0	0	0	2	0.0108696	0	0	0	0	0	0	0	0	0	0	0	0	0
DYSF	0	0	0	0	0	0	0	0	0	0	0	0	0	0	0	0	0	0	0	0	0	0	0	0	0	0	0	0	0	0	0	0	0	0	0	0	0	0	0	0	0	0	0	0	0	0	0	0	0
EGFR	0	0	0	0	0	0	0	0	0	0	0	0	0	0	0	0	0	0	0	0	0	0	0	0	0	0	0	0	0	0	0	0	0	0	0	0	0	0	0	0	0	0	0	0	0	0	0	0	0
ELK3	0	0	0	0	0	0	0	0	0	0	0	0	0	0	0	0	0	0	0	0	0	0	0	0	0	0	0	0	0	0	0	0	0	0	6	0.0326087	0	0	0	0	0	0	0	0	0	0	0	0	0
ENG	0	0	0	0	0	0	0	0	0	0	0	0	0	0	0	0	0	0	0	0	0	0	0	0	0	0	0	0	0	0	0	0	0	0	0	0	0	0	0	0	0	0	0	0	0	0	0	0	0
ENPP4	0	0	0	0	0	0	0	0	1	0.0277778	1	0.0016835	0	0	0	0	0	0	0	0	3	0.00585938	0	0	0	0	0	0	0	0	0	0	0	0	0	0	0	0	0	0	0	0	0	0	0	0	4	0.00801603	0
ENTPD1	0	0	0	0	5	0.00461255	0	0	0	0	0	0	0	0	5	0.00854701	0	0	1	0.0153846	10	0.0195312	7	0.0136187	0	0	0	0	0	0	0	0	0	0	0	0	0	0	0	0	0	0	0	0	0	0	0	0	0
ENTPD2	0	0	0	0	0	0	0	0	0	0	0	0	0	0	0	0	0	0	0	0	0	0	0	0	0	0	0	0	0	0	0	0	0	0	0	0	0	0	0	0	0	0	0	0	0	0	0	0	0
EPB41L4B	0	0	0	0	0	0	0	0	0	0	0	0	0	0	0	0	0	0	0	0	0	0	0	0	0	0	0	0	0	0	0	0	0	0	0	0	0	0	0	0	0	0	0	0	0	0	4	0.00801603	0
EPHB2	0	0	0	0	0	0	0	0	0	0	0	0	0	0	0	0	0	0	0	0	0	0	0	0	0	0	0	0	0	0	0	0	0	0	0	0	0	0	0	0	0	0	0	0	0	0	0	0	0
EPPK1	0	0	0	0	0	0	0	0	0	0	0	0	0	0	0	0	0	0	0	0	0	0	0	0	0	0	0	0	0	0	0	0	0	0	0	0	0	0	0	0	0	0	0	0	0	0	0	0	0
ERBB2	0	0	0	0	8	0.00738007	0	0	0	0	3	0.00505051	0	0	0	0	0	0	2	0.0307692	1	0.00195312	0	0	0	0	0	0	0	0	0	0	8	0.0136752	5	0.0271739	7	0.01417	0	0	0	0	4	0.00909091	0	0	10	0.0200401	0
EVL	0	0	0	0	0	0	0	0	0	0	0	0	0	0	0	0	0	0	2	0.0307692	0	0	10	0.0194553	0	0	0	0	0	0	0	0	6	0.0102564	0	0	0	0	0	0	0	0	0	0	0	0	0	0	0
EVPL	0	0	0	0	0	0	0	0	0	0	0	0	0	0	0	0	0	0	1	0.0153846	0	0	0	0	0	0	0	0	0	0	0	0	0	0	0	0	5	0.0101215	0	0	0	0	0	0	0	0	2	0.00400802	0
EXT1	0	0	0	0	0	0	0	0	0	0	2	0.003367	0	0	0	0	0	0	2	0.0307692	2	0.00390625	0	0	0	0	5	0.00883392	2	0.00410678	0	0	2	0.0034188	6	0.0326087	2	0.00404858	0	0	0	0	2	0.00454545	0	0	0	0	0
F10	0	0	0	0	0	0	0	0	0	0	0	0	0	0	0	0	0	0	0	0	0	0	0	0	0	0	0	0	0	0	0	0	0	0	0	0	0	0	0	0	0	0	0	0	0	0	0	0	0
F11	0	0	0	0	0	0	0	0	0	0	0	0	0	0	0	0	0	0	0	0	0	0	0	0	0	0	0	0	0	0	0	0	0	0	0	0	0	0	0	0	0	0	0	0	0	0	0	0	0
F11R	0	0	0	0	0	0	0	0	0	0	6	0.010101	0	0	0	0	0	0	0	0	0	0	0	0	0	0	0	0	0	0	0	0	0	0	0	0	0	0	0	0	0	0	0	0	0	0	0	0	0
F12	0	0	0	0	0	0	0	0	0	0	0	0	0	0	0	0	0	0	0	0	0	0	0	0	0	0	0	0	0	0	0	0	0	0	0	0	0	0	0	0	0	0	0	0	0	0	0	0	0
F13A1	0	0	0	0	0	0	0	0	0	0	0	0	0	0	0	0	0	0	0	0	0	0	0	0	0	0	0	0	0	0	0	0	0	0	0	0	0	0	0	0	0	0	0	0	0	0	0	0	0
F13B	0	0	0	0	0	0	0	0	0	0	0	0	0	0	0	0	0	0	0	0	0	0	0	0	0	0	0	0	0	0	0	0	0	0	0	0	0	0	0	0	0	0	0	0	0	0	0	0	0
F2	0	0	0	0	0	0	0	0	0	0	0	0	0	0	0	0	0	0	0	0	0	0	0	0	0	0	0	0	0	0	0	0	0	0	0	0	0	0	0	0	0	0	0	0	0	0	0	0	0
F2R	0	0	0	0	0	0	0	0	0	0	0	0	0	0	0	0	0	0	0	0	0	0	0	0	0	0	0	0	0	0	0	0	0	0	0	0	0	0	0	0	0	0	0	0	0	0	0	0	0
F2RL1	0	0	0	0	0	0	0	0	0	0	0	0	0	0	0	0	0	0	0	0	0	0	0	0	0	0	0	0	0	0	0	0	0	0	0	0	1	0.00202429	0	0	0	0	0	0	0	0	0	0	0
F2RL2	0	0	0	0	0	0	0	0	0	0	0	0	0	0	0	0	0	0	0	0	0	0	0	0	0	0	0	0	0	0	0	0	0	0	0	0	0	0	0	0	0	0	0	0	0	0	0	0	0
F2RL3	0	0	0	0	0	0	0	0	0	0	0	0	0	0	0	0	0	0	0	0	0	0	0	0	0	0	0	0	0	0	0	0	0	0	0	0	0	0	0	0	0	0	0	0	0	0	0	0	0
F3	0	0	0	0	0	0	0	0	0	0	0	0	0	0	0	0	0	0	0	0	0	0	0	0	0	0	0	0	0	0	0	0	0	0	0	0	0	0	0	0	0	0	0	0	0	0	0	0	0
F5	0	0	8	0.0194647	4	0.00369004	1	0.003367	0	0	3	0.00505051	4	0.021978	0	0	5	0.00956023	2	0.0307692	8	0.015625	0	0	0	0	3	0.00530035	4	0.00821355	0	0	4	0.00683761	2	0.0108696	9	0.0182186	0	0	0	0	5	0.0113636	0	0	13	0.0260521	0
F7	0	0	0	0	0	0	0	0	0	0	0	0	0	0	0	0	0	0	0	0	0	0	0	0	0	0	0	0	0	0	0	0	0	0	0	0	0	0	0	0	0	0	0	0	0	0	0	0	0
F8	0	0	0	0	0	0	0	0	0	0	0	0	0	0	0	0	0	0	0	0	0	0	0	0	0	0	0	0	0	0	0	0	0	0	0	0	0	0	0	0	0	0	0	0	0	0	0	0	0
F9	0	0	0	0	0	0	0	0	0	0	0	0	0	0	0	0	0	0	0	0	0	0	0	0	0	0	0	0	0	0	0	0	0	0	0	0	0	0	0	0	0	0	0	0	0	0	0	0	0
FBLN1	0	0	0	0	0	0	0	0	0	0	0	0	0	0	0	0	0	0	0	0	0	0	0	0	0	0	0	0	0	0	0	0	0	0	0	0	0	0	0	0	0	0	0	0	0	0	0	0	0
FCER1G	0	0	0	0	0	0	0	0	0	0	0	0	0	0	0	0	0	0	0	0	0	0	0	0	0	0	0	0	0	0	0	0	0	0	0	0	0	0	0	0	0	0	0	0	0	0	0	0	0
FER1L5	0	0	0	0	0	0	0	0	0	0	0	0	0	0	0	0	0	0	0	0	0	0	0	0	0	0	0	0	0	0	0	0	0	0	0	0	0	0	0	0	0	0	0	0	0	0	0	0	0
FERMT1	0	0	0	0	0	0	0	0	0	0	1	0.0016835	0	0	0	0	0	0	0	0	0	0	0	0	0	0	0	0	0	0	0	0	0	0	0	0	0	0	0	0	0	0	0	0	0	0	0	0	0
FERMT2	0	0	0	0	0	0	0	0	0	0	0	0	0	0	16	0.0273504	0	0	0	0	0	0	1	0.00194553	3	0.00806452	1	0.00176678	0	0	0	0	2	0.0034188	0	0	0	0	0	0	0	0	0	0	0	0	12	0.0240481	0
FERMT3	0	0	0	0	0	0	0	0	0	0	0	0	0	0	0	0	0	0	0	0	0	0	0	0	0	0	0	0	0	0	0	0	0	0	0	0	0	0	0	0	0	0	0	0	0	0	0	0	0
FGA	0	0	0	0	0	0	0	0	0	0	0	0	0	0	0	0	0	0	0	0	0	0	0	0	0	0	0	0	0	0	0	0	0	0	0	0	0	0	0	0	0	0	0	0	0	0	0	0	0
FGB	0	0	0	0	0	0	0	0	0	0	0	0	0	0	0	0	0	0	0	0	0	0	0	0	0	0	0	0	0	0	0	0	0	0	0	0	0	0	0	0	0	0	0	0	0	0	0	0	0
FGF1	0	0	0	0	0	0	0	0	0	0	0	0	0	0	0	0	0	0	0	0	0	0	0	0	0	0	0	0	0	0	0	0	0	0	0	0	0	0	0	0	0	0	0	0	0	0	0	0	0
FGF10	0	0	0	0	0	0	0	0	0	0	0	0	0	0	1	0.0017094	0	0	0	0	0	0	0	0	0	0	0	0	0	0	0	0	0	0	0	0	0	0	0	0	0	0	0	0	0	0	0	0	0
FGF2	0	0	0	0	0	0	0	0	0	0	0	0	0	0	0	0	0	0	0	0	0	0	0	0	0	0	0	0	0	0	0	0	0	0	0	0	0	0	0	0	0	0	0	0	0	0	0	0	0
FGF7	0	0	0	0	0	0	0	0	0	0	0	0	0	0	0	0	0	0	0	0	0	0	0	0	0	0	0	0	0	0	0	0	0	0	0	0	0	0	0	0	0	0	0	0	0	0	0	0	0
FGFR1OP2	0	0	8	0.0194647	31	0.0285978	12	0.040404	1	0.0277778	14	0.023569	3	0.0164835	0	0	12	0.0229446	2	0.0307692	8	0.015625	5	0.00972763	15	0.0403226	1	0.00176678	2	0.00410678	0	0	1	0.0017094	2	0.0108696	13	0.0263158	5	0.0196078	10	0.0226244	12	0.0272727	0	0	19	0.0380762	0
FGG	0	0	0	0	0	0	0	0	0	0	0	0	0	0	0	0	0	0	0	0	0	0	0	0	0	0	0	0	0	0	0	0	0	0	0	0	0	0	0	0	0	0	0	0	0	0	0	0	0
FKBP10	0	0	0	0	0	0	0	0	0	0	0	0	0	0	0	0	0	0	0	0	0	0	0	0	0	0	0	0	0	0	0	0	0	0	0	0	0	0	0	0	0	0	0	0	0	0	0	0	0
FLNA	0	0	0	0	0	0	0	0	0	0	0	0	0	0	0	0	0	0	0	0	3	0.00585938	0	0	0	0	0	0	0	0	0	0	0	0	0	0	0	0	0	0	0	0	0	0	0	0	0	0	0
FN1	0	0	0	0	0	0	0	0	0	0	0	0	0	0	0	0	0	0	0	0	0	0	0	0	0	0	0	0	0	0	0	0	0	0	0	0	0	0	0	0	0	0	0	0	0	0	0	0	0
FNTB	0	0	7	0.0170316	65	0.0599631	6	0.020202	1	0.0277778	46	0.0774411	3	0.0164835	3	0.00512821	12	0.0229446	1	0.0153846	31	0.0605469	0	0	18	0.0483871	19	0.0335689	7	0.0143737	0	0	34	0.0581197	3	0.0163043	17	0.034413	0	0	0	0	14	0.0318182	1	0.00671141	3	0.00601202	4
FOXA2	0	0	0	0	0	0	0	0	0	0	0	0	0	0	0	0	0	0	0	0	0	0	0	0	0	0	0	0	0	0	0	0	0	0	0	0	0	0	0	0	0	0	0	0	0	0	0	0	0
FOXC2	0	0	0	0	0	0	0	0	0	0	0	0	0	0	0	0	0	0	0	0	0	0	0	0	0	0	0	0	0	0	0	0	0	0	0	0	0	0	0	0	0	0	0	0	0	0	0	0	0
FZD6	0	0	0	0	0	0	0	0	1	0.0277778	1	0.0016835	0	0	0	0	0	0	2	0.0307692	0	0	0	0	0	0	3	0.00530035	0	0	0	0	0	0	3	0.0163043	13	0.0263158	0	0	0	0	0	0	0	0	4	0.00801603	0
FZD7	0	0	0	0	0	0	0	0	0	0	0	0	0	0	0	0	0	0	0	0	0	0	0	0	0	0	0	0	0	0	0	0	0	0	0	0	0	0	0	0	0	0	0	0	0	0	0	0	0
GAS6	0	0	0	0	0	0	0	0	0	0	0	0	0	0	0	0	0	0	0	0	0	0	0	0	0	0	0	0	0	0	0	0	0	0	2	0.0108696	0	0	0	0	0	0	0	0	0	0	0	0	0
GATA1	0	0	0	0	0	0	0	0	0	0	0	0	0	0	0	0	0	0	0	0	0	0	0	0	0	0	0	0	0	0	0	0	0	0	0	0	0	0	0	0	0	0	0	0	0	0	0	0	0
GATA2	0	0	0	0	0	0	0	0	0	0	0	0	0	0	0	0	0	0	0	0	0	0	0	0	0	0	0	0	0	0	0	0	0	0	0	0	0	0	0	0	0	0	0	0	0	0	0	0	0
GATA4	0	0	0	0	0	0	0	0	0	0	0	0	0	0	0	0	0	0	0	0	0	0	0	0	0	0	0	0	0	0	0	0	0	0	0	0	0	0	0	0	0	0	0	0	0	0	0	0	0
GJA1	0	0	0	0	0	0	0	0	0	0	0	0	0	0	0	0	0	0	0	0	0	0	0	0	0	0	0	0	0	0	0	0	0	0	0	0	0	0	0	0	0	0	0	0	0	0	0	0	0
GNA13	0	0	0	0	9	0.00830258	4	0.013468	0	0	14	0.023569	1	0.00549451	1	0.0017094	7	0.0133843	0	0	3	0.00585938	4	0.0077821	0	0	0	0	0	0	0	0	4	0.00683761	3	0.0163043	3	0.00607287	0	0	13	0.0294118	0	0	2	0.0134228	1	0.00200401	2
GNAS	0	0	1	0.00243309	0	0	0	0	0	0	10	0.016835	1	0.00549451	0	0	1	0.00191205	0	0	0	0	5	0.00972763	0	0	2	0.00353357	2	0.00410678	0	0	2	0.0034188	0	0	0	0	0	0	0	0	6	0.0136364	0	0	0	0	0
GP1BA	0	0	0	0	0	0	0	0	0	0	0	0	0	0	0	0	0	0	0	0	0	0	0	0	0	0	0	0	0	0	0	0	0	0	0	0	0	0	0	0	0	0	0	0	0	0	0	0	0
GP1BB	0	0	0	0	0	0	0	0	0	0	0	0	0	0	0	0	0	0	0	0	0	0	0	0	0	0	0	0	0	0	0	0	0	0	0	0	0	0	0	0	0	0	0	0	0	0	0	0	0
GP5	0	0	0	0	0	0	0	0	0	0	0	0	0	0	0	0	0	0	0	0	0	0	0	0	0	0	0	0	0	0	0	0	0	0	0	0	0	0	0	0	0	0	0	0	0	0	0	0	0
GP6	0	0	0	0	0	0	0	0	0	0	0	0	0	0	0	0	0	0	0	0	0	0	0	0	0	0	0	0	0	0	0	0	0	0	0	0	0	0	0	0	0	0	0	0	0	0	0	0	0
GP9	0	0	0	0	0	0	0	0	0	0	0	0	0	0	0	0	0	0	0	0	0	0	0	0	0	0	0	0	0	0	0	0	0	0	0	0	0	0	0	0	0	0	0	0	0	0	0	0	0
GPR4	0	0	0	0	0	0	0	0	1	0.0277778	0	0	0	0	0	0	0	0	0	0	0	0	0	0	0	0	0	0	0	0	0	0	0	0	0	0	0	0	0	0	0	0	0	0	0	0	0	0	0
GPX1	0	0	0	0	0	0	0	0	0	0	0	0	3	0.0164835	0	0	0	0	0	0	0	0	0	0	0	0	0	0	0	0	0	0	0	0	0	0	0	0	0	0	0	0	0	0	0	0	0	0	0
GRHL3	0	0	0	0	0	0	0	0	0	0	0	0	0	0	0	0	0	0	0	0	0	0	0	0	0	0	0	0	0	0	0	0	0	0	0	0	0	0	0	0	0	0	0	0	0	0	0	0	0
HBEGF	0	0	0	0	0	0	0	0	0	0	0	0	0	0	0	0	0	0	0	0	0	0	0	0	0	0	0	0	0	0	0	0	0	0	0	0	0	0	0	0	0	0	0	0	0	0	0	0	0
HGFAC	0	0	0	0	0	0	0	0	0	0	0	0	0	0	0	0	0	0	0	0	0	0	0	0	0	0	0	0	0	0	0	0	0	0	0	0	0	0	0	0	0	0	0	0	0	0	0	0	0
HIF1A	0	0	0	0	0	0	0	0	0	0	0	0	0	0	0	0	0	0	3	0.0461538	0	0	1	0.00194553	0	0	0	0	0	0	0	0	26	0.0444444	1	0.00543478	0	0	0	0	0	0	0	0	6	0.0402685	0	0	0
HMGB1	2	0.0229885	2	0.00486618	10	0.00922509	7	0.023569	2	0.0555556	17	0.0286195	0	0	3	0.00512821	0	0	0	0	4	0.0078125	23	0.0447471	11	0.0295699	10	0.0176678	2	0.00410678	3	0.0344828	4	0.00683761	1	0.00543478	23	0.0465587	9	0.0352941	9	0.020362	0	0	9	0.0604027	12	0.0240481	0
HMGCR	0	0	0	0	0	0	0	0	0	0	2	0.003367	0	0	0	0	0	0	0	0	0	0	0	0	0	0	0	0	0	0	0	0	0	0	0	0	3	0.00607287	0	0	0	0	0	0	0	0	0	0	0
HMOX1	0	0	0	0	0	0	0	0	0	0	0	0	0	0	0	0	0	0	0	0	0	0	0	0	0	0	0	0	0	0	0	0	0	0	0	0	0	0	0	0	0	0	0	0	0	0	0	0	0
HNF4A	0	0	0	0	0	0	0	0	0	0	1	0.0016835	0	0	0	0	0	0	0	0	0	0	0	0	0	0	0	0	0	0	0	0	0	0	0	0	0	0	0	0	0	0	0	0	0	0	0	0	0
HPS1	0	0	6	0.0145985	28	0.0258303	11	0.037037	0	0	12	0.020202	8	0.043956	0	0	10	0.0191205	0	0	7	0.0136719	0	0	4	0.0107527	6	0.0106007	32	0.0657084	3	0.0344828	15	0.025641	11	0.0597826	0	0	0	0	0	0	12	0.0272727	0	0	3	0.00601202	2
HPS4	6	0.0689655	0	0	44	0.0405904	0	0	3	0.0833333	7	0.0117845	7	0.0384615	7	0.0119658	12	0.0229446	0	0	0	0	24	0.0466926	0	0	10	0.0176678	2	0.00410678	0	0	39	0.0666667	1	0.00543478	16	0.0323887	2	0.00784314	0	0	0	0	0	0	36	0.0721443	7
HPS5	1	0.0114943	1	0.00243309	6	0.00553506	2	0.00673401	0	0	19	0.0319865	0	0	1	0.0017094	9	0.0172084	2	0.0307692	2	0.00390625	12	0.0233463	0	0	1	0.00176678	2	0.00410678	0	0	8	0.0136752	4	0.0217391	8	0.0161943	1	0.00392157	0	0	0	0	0	0	13	0.0260521	0
HPS6	0	0	13	0.0316302	31	0.0285978	16	0.0538721	2	0.0555556	9	0.0151515	7	0.0384615	0	0	23	0.0439771	0	0	15	0.0292969	33	0.0642023	15	0.0403226	9	0.0159011	8	0.0164271	6	0.0689655	31	0.0529915	4	0.0217391	33	0.0668016	10	0.0392157	0	0	1	0.00227273	1	0.00671141	6	0.012024	1
HPSE	0	0	0	0	0	0	0	0	0	0	0	0	0	0	0	0	0	0	0	0	0	0	0	0	0	0	0	0	0	0	0	0	0	0	0	0	0	0	0	0	0	0	0	0	0	0	0	0	0
HRAS	0	0	0	0	0	0	0	0	0	0	1	0.0016835	0	0	3	0.00512821	0	0	0	0	0	0	0	0	0	0	0	0	0	0	0	0	0	0	0	0	0	0	0	0	0	0	0	0	0	0	0	0	0
HRG	0	0	0	0	0	0	0	0	0	0	0	0	0	0	0	0	0	0	0	0	0	0	0	0	0	0	0	0	0	0	0	0	0	0	0	0	0	0	0	0	0	0	0	0	0	0	0	0	0
IGF1	0	0	0	0	0	0	0	0	0	0	0	0	0	0	0	0	0	0	0	0	0	0	0	0	0	0	0	0	0	0	0	0	0	0	0	0	0	0	0	0	0	0	0	0	0	0	0	0	0
IL1A	0	0	0	0	0	0	0	0	0	0	0	0	0	0	0	0	0	0	0	0	0	0	0	0	0	0	0	0	0	0	0	0	0	0	0	0	0	0	0	0	0	0	0	0	0	0	0	0	0
INSL3	0	0	0	0	0	0	0	0	0	0	0	0	0	0	0	0	0	0	0	0	0	0	0	0	0	0	0	0	0	0	0	0	0	0	0	0	0	0	0	0	0	0	0	0	0	0	0	0	0
ITGA2B	0	0	0	0	0	0	0	0	0	0	0	0	0	0	0	0	0	0	0	0	0	0	0	0	0	0	0	0	0	0	0	0	0	0	0	0	0	0	0	0	0	0	0	0	0	0	0	0	0
ITGB1	0	0	0	0	1	0.000922509	0	0	0	0	1	0.0016835	0	0	0	0	0	0	0	0	4	0.0078125	0	0	0	0	0	0	0	0	0	0	0	0	1	0.00543478	0	0	0	0	0	0	0	0	0	0	3	0.00601202	0
ITGB3	0	0	0	0	0	0	0	0	0	0	0	0	0	0	0	0	0	0	0	0	0	0	0	0	0	0	0	0	0	0	0	0	0	0	0	0	0	0	0	0	0	0	0	0	0	0	0	0	0
JAML	0	0	0	0	0	0	0	0	0	0	0	0	0	0	0	0	0	0	0	0	0	0	0	0	0	0	0	0	0	0	0	0	0	0	0	0	0	0	0	0	0	0	0	0	0	0	0	0	0
KANK1	0	0	0	0	0	0	0	0	0	0	0	0	0	0	0	0	0	0	0	0	3	0.00585938	1	0.00194553	0	0	0	0	0	0	0	0	0	0	0	0	5	0.0101215	0	0	0	0	0	0	0	0	0	0	0
KDR	0	0	0	0	0	0	0	0	0	0	0	0	0	0	0	0	0	0	0	0	0	0	0	0	0	0	0	0	0	0	0	0	0	0	0	0	0	0	0	0	0	0	0	0	0	0	0	0	0
KLKB1	0	0	0	0	0	0	0	0	0	0	0	0	0	0	0	0	0	0	0	0	0	0	0	0	0	0	0	0	0	0	0	0	0	0	0	0	0	0	0	0	0	0	0	0	0	0	0	0	0
KNG1	0	0	0	0	0	0	0	0	0	0	0	0	0	0	0	0	0	0	0	0	0	0	0	0	0	0	0	0	0	0	0	0	0	0	0	0	0	0	0	0	0	0	0	0	0	0	0	0	0
KRT6A	0	0	0	0	0	0	0	0	0	0	0	0	0	0	0	0	0	0	0	0	0	0	0	0	0	0	0	0	0	0	0	0	0	0	0	0	0	0	0	0	0	0	0	0	0	0	0	0	0
LNPK	0	0	0	0	0	0	0	0	1	0.0277778	16	0.026936	1	0.00549451	0	0	3	0.00573614	1	0.0153846	1	0.00195312	4	0.0077821	0	0	0	0	0	0	0	0	2	0.0034188	1	0.00543478	4	0.00809717	0	0	0	0	1	0.00227273	0	0	8	0.0160321	0
LOX	0	0	0	0	0	0	0	0	0	0	0	0	0	0	0	0	0	0	0	0	0	0	0	0	0	0	0	0	0	0	0	0	0	0	0	0	0	0	0	0	0	0	0	0	0	0	0	0	0
LYN	0	0	0	0	0	0	0	0	0	0	0	0	0	0	0	0	0	0	0	0	0	0	0	0	0	0	1	0.00176678	0	0	0	0	3	0.00512821	4	0.0217391	0	0	0	0	0	0	0	0	0	0	0	0	0
LYST	0	0	0	0	0	0	0	0	0	0	0	0	0	0	0	0	0	0	0	0	0	0	0	0	0	0	0	0	0	0	0	0	0	0	0	0	2	0.00404858	0	0	0	0	0	0	0	0	0	0	0
MACF1	0	0	0	0	0	0	0	0	1	0.0277778	0	0	0	0	0	0	0	0	0	0	3	0.00585938	25	0.0486381	0	0	0	0	0	0	0	0	1	0.0017094	11	0.0597826	0	0	0	0	2	0.00452489	0	0	0	0	2	0.00400802	0
MAP3K1	0	0	0	0	0	0	0	0	0	0	6	0.010101	0	0	0	0	0	0	3	0.0461538	0	0	0	0	0	0	8	0.0141343	0	0	0	0	2	0.0034188	2	0.0108696	0	0	0	0	0	0	0	0	0	0	0	0	0
MERTK	0	0	0	0	0	0	0	0	0	0	0	0	0	0	0	0	0	0	1	0.0153846	0	0	0	0	0	0	0	0	0	0	0	0	0	0	0	0	0	0	0	0	0	0	0	0	0	0	0	0	0
MIA3	1	0.0114943	2	0.00486618	0	0	0	0	0	0	0	0	0	0	4	0.00683761	10	0.0191205	0	0	10	0.0195312	13	0.0252918	2	0.00537634	0	0	1	0.00205339	2	0.0229885	6	0.0102564	0	0	0	0	0	0	5	0.0113122	0	0	6	0.0402685	3	0.00601202	3
MMP12	0	0	0	0	0	0	0	0	0	0	0	0	0	0	0	0	0	0	0	0	0	0	0	0	0	0	0	0	0	0	0	0	0	0	0	0	0	0	0	0	0	0	0	0	0	0	0	0	0
MMRN1	0	0	0	0	0	0	0	0	0	0	0	0	0	0	0	0	0	0	0	0	0	0	0	0	0	0	0	0	0	0	0	0	0	0	0	0	0	0	0	0	0	0	0	0	0	0	0	0	0
MPIG6B	0	0	0	0	0	0	0	0	0	0	0	0	0	0	0	0	0	0	0	0	0	0	0	0	0	0	0	0	0	0	0	0	0	0	0	0	0	0	0	0	0	0	0	0	0	0	0	0	0
MRTFA	0	0	0	0	24	0.0221402	0	0	0	0	2	0.003367	0	0	2	0.0034188	1	0.00191205	0	0	3	0.00585938	3	0.00583658	0	0	6	0.0106007	0	0	0	0	22	0.0376068	1	0.00543478	11	0.0222672	1	0.00392157	0	0	1	0.00227273	0	0	0	0	3
MSX2	0	0	0	0	0	0	0	0	0	0	0	0	0	0	0	0	0	0	0	0	0	0	0	0	0	0	0	0	0	0	0	0	0	0	0	0	0	0	0	0	0	0	0	0	0	0	0	0	0
MTOR	0	0	2	0.00486618	41	0.0378229	4	0.013468	0	0	19	0.0319865	1	0.00549451	6	0.0102564	12	0.0229446	0	0	7	0.0136719	76	0.14786	0	0	13	0.0229682	16	0.0328542	5	0.0574713	10	0.017094	11	0.0597826	0	0	2	0.00784314	15	0.0339367	1	0.00227273	0	0	7	0.0140281	0
MUC16	0	0	0	0	0	0	0	0	0	0	0	0	0	0	0	0	0	0	0	0	0	0	0	0	0	0	0	0	0	0	0	0	0	0	0	0	0	0	0	0	0	0	0	0	0	0	0	0	0
MUSTN1	0	0	0	0	0	0	0	0	0	0	0	0	0	0	0	0	0	0	0	0	0	0	0	0	0	0	0	0	0	0	0	0	0	0	0	0	0	0	0	0	0	0	0	0	0	0	0	0	0
MYH10	0	0	0	0	0	0	0	0	0	0	0	0	0	0	0	0	0	0	0	0	0	0	0	0	0	0	0	0	0	0	0	0	0	0	0	0	0	0	0	0	0	0	0	0	0	0	0	0	0
MYH2	0	0	3	0.00729927	8	0.00738007	1	0.003367	0	0	5	0.00841751	0	0	0	0	2	0.00382409	3	0.0461538	8	0.015625	0	0	0	0	1	0.00176678	0	0	0	0	12	0.0205128	6	0.0326087	5	0.0101215	0	0	0	0	9	0.0204545	0	0	16	0.0320641	0
MYH9	0	0	0	0	6	0.00553506	0	0	0	0	0	0	0	0	0	0	0	0	0	0	0	0	5	0.00972763	0	0	0	0	0	0	0	0	0	0	1	0.00543478	5	0.0101215	0	0	0	0	0	0	0	0	0	0	0
MYLK	0	0	0	0	0	0	0	0	0	0	0	0	0	0	0	0	0	0	0	0	0	0	0	0	0	0	0	0	0	0	0	0	0	0	0	0	0	0	0	0	0	0	0	0	0	0	0	0	0
MYOF	0	0	0	0	2	0.00184502	0	0	0	0	0	0	0	0	0	0	3	0.00573614	0	0	2	0.00390625	0	0	0	0	0	0	0	0	0	0	0	0	1	0.00543478	0	0	0	0	0	0	0	0	0	0	9	0.0180361	0
MYOZ1	0	0	0	0	0	0	0	0	0	0	0	0	0	0	0	0	0	0	0	0	0	0	0	0	0	0	0	0	0	0	0	0	0	0	0	0	0	0	0	0	0	0	0	0	0	0	0	0	0
NACA	1	0.0114943	0	0	2	0.00184502	0	0	0	0	11	0.0185185	0	0	0	0	0	0	0	0	0	0	0	0	0	0	0	0	1	0.00205339	0	0	0	0	1	0.00543478	0	0	0	0	0	0	0	0	0	0	0	0	0
NBEAL2	0	0	0	0	1	0.000922509	0	0	0	0	0	0	0	0	0	0	0	0	0	0	0	0	0	0	0	0	0	0	0	0	0	0	0	0	0	0	0	0	0	0	0	0	0	0	0	0	0	0	0
NDNF	0	0	0	0	0	0	0	0	0	0	0	0	0	0	0	0	0	0	0	0	0	0	0	0	0	0	0	0	0	0	0	0	0	0	0	0	0	0	0	0	0	0	0	0	0	0	0	0	0
NF1	0	0	1	0.00243309	15	0.0138376	3	0.010101	0	0	15	0.0252525	3	0.0164835	1	0.0017094	4	0.00764818	0	0	6	0.0117188	9	0.0175097	1	0.00268817	7	0.0123675	13	0.026694	1	0.0114943	17	0.0290598	2	0.0108696	3	0.00607287	4	0.0156863	21	0.0475113	7	0.0159091	0	0	13	0.0260521	0
NFE2L2	0	0	0	0	22	0.0202952	0	0	0	0	17	0.0286195	0	0	3	0.00512821	0	0	0	0	4	0.0078125	5	0.00972763	3	0.00806452	0	0	0	0	2	0.0229885	7	0.0119658	10	0.0543478	7	0.01417	5	0.0196078	6	0.0135747	1	0.00227273	0	0	0	0	0
NLRP6	0	0	0	0	0	0	0	0	0	0	0	0	0	0	0	0	0	0	0	0	0	0	0	0	0	0	0	0	0	0	0	0	0	0	0	0	0	0	0	0	0	0	0	0	0	0	0	0	0
NOG	0	0	0	0	0	0	0	0	0	0	0	0	0	0	0	0	0	0	0	0	0	0	0	0	0	0	0	0	0	0	0	0	0	0	0	0	0	0	0	0	0	0	0	0	0	0	0	0	0
NOTCH2	0	0	0	0	1	0.000922509	0	0	0	0	0	0	0	0	0	0	0	0	0	0	9	0.0175781	5	0.00972763	0	0	0	0	0	0	0	0	1	0.0017094	5	0.0271739	0	0	0	0	1	0.00226244	0	0	0	0	0	0	0
NR4A3	0	0	0	0	0	0	0	0	0	0	0	0	0	0	0	0	0	0	0	0	0	0	0	0	0	0	0	0	0	0	0	0	0	0	0	0	0	0	0	0	0	0	0	0	0	0	0	0	0
P2RX1	0	0	0	0	0	0	0	0	0	0	0	0	0	0	0	0	0	0	0	0	0	0	0	0	0	0	0	0	0	0	0	0	0	0	0	0	0	0	0	0	0	0	0	0	0	0	0	0	0
P2RY1	0	0	0	0	0	0	0	0	0	0	0	0	0	0	0	0	0	0	0	0	0	0	0	0	0	0	0	0	0	0	0	0	0	0	0	0	0	0	0	0	0	0	0	0	0	0	0	0	0
P2RY12	0	0	8	0.0194647	0	0	2	0.00673401	0	0	19	0.0319865	0	0	0	0	0	0	4	0.0615385	4	0.0078125	0	0	0	0	4	0.00706714	0	0	1	0.0114943	4	0.00683761	1	0.00543478	1	0.00202429	2	0.00784314	0	0	3	0.00681818	0	0	1	0.00200401	0
PAK1	0	0	0	0	0	0	0	0	0	0	0	0	0	0	0	0	0	0	0	0	0	0	0	0	0	0	0	0	0	0	0	0	0	0	0	0	0	0	0	0	0	0	0	0	0	0	0	0	0
PAPSS2	0	0	0	0	1	0.000922509	3	0.010101	1	0.0277778	9	0.0151515	0	0	6	0.0102564	9	0.0172084	1	0.0153846	0	0	0	0	2	0.00537634	0	0	1	0.00205339	0	0	3	0.00512821	0	0	0	0	1	0.00392157	0	0	1	0.00227273	0	0	1	0.00200401	0
PARD3	0	0	6	0.0145985	2	0.00184502	0	0	4	0.111111	1	0.0016835	1	0.00549451	0	0	0	0	4	0.0615385	0	0	7	0.0136187	12	0.0322581	0	0	0	0	2	0.0229885	0	0	8	0.0434783	12	0.0242915	14	0.054902	18	0.040724	0	0	3	0.0201342	17	0.0340681	6
PDCD10	1	0.0114943	0	0	0	0	0	0	0	0	0	0	0	0	0	0	0	0	0	0	1	0.00195312	0	0	0	0	0	0	0	0	0	0	0	0	0	0	1	0.00202429	0	0	0	0	0	0	0	0	0	0	0
PDGFA	0	0	0	0	0	0	0	0	0	0	0	0	0	0	0	0	0	0	0	0	0	0	0	0	0	0	0	0	0	0	0	0	0	0	0	0	0	0	0	0	0	0	0	0	0	0	0	0	0
PDGFB	0	0	0	0	0	0	0	0	0	0	0	0	0	0	0	0	0	0	0	0	0	0	0	0	0	0	0	0	0	0	0	0	0	0	0	0	0	0	0	0	0	0	0	0	0	0	0	0	0
PDGFRA	0	0	0	0	0	0	0	0	0	0	0	0	0	0	0	0	0	0	0	0	0	0	0	0	0	0	0	0	0	0	0	0	0	0	0	0	0	0	0	0	0	0	0	0	0	0	0	0	0
PDPN	0	0	0	0	0	0	0	0	0	0	0	0	0	0	0	0	0	0	0	0	0	0	0	0	0	0	0	0	0	0	0	0	0	0	1	0.00543478	0	0	0	0	0	0	0	0	0	0	0	0	0
PEAR1	0	0	0	0	0	0	0	0	0	0	0	0	0	0	0	0	0	0	0	0	0	0	0	0	0	0	0	0	0	0	0	0	0	0	0	0	0	0	0	0	0	0	0	0	0	0	0	0	0
PECAM1	0	0	0	0	0	0	0	0	0	0	0	0	0	0	0	0	0	0	0	0	0	0	0	0	0	0	0	0	0	0	0	0	0	0	0	0	0	0	0	0	0	0	0	0	0	0	0	0	0
PF4	0	0	0	0	0	0	0	0	0	0	0	0	0	0	0	0	0	0	1	0.0153846	10	0.0195312	0	0	0	0	0	0	0	0	0	0	0	0	0	0	0	0	0	0	0	0	0	0	0	0	0	0	0
PHLDB2	0	0	0	0	4	0.00369004	0	0	0	0	20	0.03367	1	0.00549451	2	0.0034188	0	0	2	0.0307692	3	0.00585938	3	0.00583658	0	0	4	0.00706714	0	0	1	0.0114943	4	0.00683761	1	0.00543478	0	0	0	0	0	0	0	0	0	0	4	0.00801603	0
PIK3CB	0	0	16	0.0389294	41	0.0378229	4	0.013468	0	0	4	0.00673401	2	0.010989	2	0.0034188	8	0.0152964	1	0.0153846	9	0.0175781	0	0	0	0	15	0.0265018	11	0.0225873	1	0.0114943	63	0.107692	0	0	8	0.0161943	0	0	0	0	0	0	0	0	7	0.0140281	0
PIP5K1C	0	0	0	0	0	0	0	0	0	0	0	0	0	0	0	0	0	0	0	0	0	0	0	0	0	0	0	0	0	0	0	0	0	0	0	0	0	0	0	0	0	0	0	0	0	0	0	0	0
PLA2G4A	0	0	0	0	0	0	0	0	0	0	0	0	0	0	0	0	0	0	0	0	0	0	0	0	0	0	0	0	0	0	0	0	0	0	0	0	0	0	0	0	0	0	0	0	0	0	0	0	0
PLAU	0	0	0	0	12	0.0110701	0	0	0	0	0	0	0	0	0	0	0	0	1	0.0153846	6	0.0117188	0	0	0	0	0	0	0	0	0	0	0	0	0	0	3	0.00607287	0	0	0	0	1	0.00227273	0	0	0	0	0
PLEC	0	0	0	0	0	0	0	0	0	0	0	0	0	0	0	0	0	0	0	0	0	0	0	0	0	0	0	0	0	0	0	0	0	0	0	0	0	0	0	0	0	0	0	0	0	0	0	0	0
PLEK	0	0	0	0	0	0	0	0	0	0	0	0	0	0	0	0	0	0	0	0	0	0	0	0	0	0	0	0	0	0	0	0	0	0	0	0	0	0	0	0	0	0	0	0	0	0	0	0	0
PLET1	0	0	0	0	0	0	0	0	0	0	0	0	0	0	0	0	0	0	0	0	0	0	0	0	0	0	0	0	0	0	0	0	0	0	0	0	0	0	0	0	0	0	0	0	0	0	0	0	0
PLG	0	0	0	0	0	0	0	0	0	0	2	0.003367	0	0	0	0	0	0	0	0	3	0.00585938	15	0.0291829	0	0	0	0	0	0	0	0	0	0	1	0.00543478	0	0	0	0	0	0	0	0	0	0	0	0	0
PLPP3	0	0	0	0	0	0	0	0	0	0	0	0	0	0	0	0	0	0	0	0	0	0	0	0	0	0	0	0	0	0	0	0	0	0	0	0	0	0	0	0	0	0	0	0	0	0	0	0	0
POU2F3	0	0	0	0	0	0	2	0.00673401	0	0	5	0.00841751	0	0	0	0	0	0	1	0.0153846	1	0.00195312	0	0	0	0	1	0.00176678	4	0.00821355	2	0.0229885	4	0.00683761	1	0.00543478	2	0.00404858	0	0	0	0	1	0.00227273	0	0	13	0.0260521	0
PPARA	0	0	0	0	0	0	0	0	1	0.0277778	1	0.0016835	0	0	3	0.00512821	0	0	0	0	0	0	3	0.00583658	0	0	1	0.00176678	0	0	0	0	5	0.00854701	0	0	2	0.00404858	1	0.00392157	0	0	0	0	0	0	2	0.00400802	0
PPARD	0	0	1	0.00243309	0	0	0	0	0	0	1	0.0016835	0	0	0	0	0	0	1	0.0153846	0	0	1	0.00194553	0	0	0	0	1	0.00205339	0	0	0	0	0	0	0	0	0	0	0	0	0	0	0	0	0	0	0
PPIA	0	0	0	0	0	0	0	0	1	0.0277778	0	0	0	0	0	0	0	0	0	0	0	0	0	0	0	0	0	0	0	0	0	0	0	0	0	0	2	0.00404858	0	0	0	0	0	0	0	0	0	0	0
PPL	0	0	0	0	0	0	0	0	0	0	0	0	0	0	0	0	0	0	2	0.0307692	2	0.00390625	0	0	1	0.00268817	1	0.00176678	0	0	0	0	0	0	2	0.0108696	12	0.0242915	0	0	0	0	0	0	12	0.0805369	4	0.00801603	0
PRCP	0	0	0	0	0	0	2	0.00673401	0	0	0	0	1	0.00549451	0	0	0	0	2	0.0307692	0	0	5	0.00972763	0	0	0	0	1	0.00205339	0	0	1	0.0017094	0	0	5	0.0101215	0	0	0	0	0	0	0	0	1	0.00200401	0
PRDX2	1	0.0114943	0	0	0	0	0	0	0	0	0	0	0	0	1	0.0017094	0	0	3	0.0461538	0	0	3	0.00583658	0	0	0	0	0	0	0	0	0	0	1	0.00543478	0	0	0	0	0	0	0	0	0	0	0	0	0
PRKCA	0	0	0	0	0	0	0	0	0	0	5	0.00841751	28	0.153846	0	0	37	0.0707457	0	0	0	0	0	0	0	0	8	0.0141343	0	0	0	0	9	0.0153846	1	0.00543478	4	0.00809717	0	0	5	0.0113122	0	0	0	0	2	0.00400802	0
PRKCD	0	0	0	0	0	0	0	0	0	0	1	0.0016835	0	0	0	0	0	0	0	0	2	0.00390625	0	0	0	0	0	0	0	0	0	0	1	0.0017094	0	0	11	0.0222672	0	0	0	0	0	0	0	0	0	0	0
PRKCE	0	0	0	0	0	0	0	0	0	0	0	0	0	0	0	0	0	0	0	0	0	0	0	0	0	0	0	0	0	0	0	0	0	0	0	0	0	0	0	0	0	0	0	0	0	0	0	0	0
PRKCQ	0	0	0	0	0	0	0	0	0	0	0	0	0	0	0	0	0	0	0	0	0	0	0	0	0	0	0	0	0	0	0	0	0	0	0	0	0	0	0	0	0	0	0	0	0	0	0	0	0
PRKG1	0	0	0	0	0	0	0	0	0	0	0	0	0	0	0	0	0	0	0	0	0	0	0	0	0	0	0	0	0	0	0	0	0	0	0	0	0	0	0	0	0	0	0	0	0	0	0	0	0
PROC	0	0	0	0	0	0	0	0	0	0	0	0	0	0	0	0	0	0	0	0	0	0	0	0	0	0	0	0	0	0	0	0	0	0	1	0.00543478	0	0	0	0	0	0	0	0	0	0	0	0	0
PROCR	0	0	0	0	0	0	0	0	0	0	0	0	0	0	0	0	0	0	0	0	0	0	0	0	0	0	0	0	0	0	0	0	0	0	0	0	0	0	0	0	0	0	0	0	0	0	0	0	0
PROS1	0	0	0	0	0	0	0	0	0	0	0	0	0	0	0	0	0	0	0	0	0	0	0	0	0	0	0	0	0	0	0	0	0	0	0	0	0	0	0	0	0	0	0	0	0	0	0	0	0
PROZ	0	0	0	0	0	0	0	0	0	0	0	0	0	0	0	0	0	0	0	0	0	0	0	0	0	0	0	0	0	0	0	0	0	0	0	0	0	0	0	0	0	0	0	0	0	0	0	0	0
PRSS56	0	0	22	0.053528	42	0.0387454	24	0.0808081	1	0.0277778	42	0.0707071	8	0.043956	3	0.00512821	30	0.0573614	5	0.0769231	6	0.0117188	34	0.0661479	13	0.0349462	8	0.0141343	55	0.112936	11	0.126437	39	0.0666667	2	0.0108696	106	0.214575	7	0.027451	11	0.0248869	34	0.0772727	3	0.0201342	8	0.0160321	1
PTEN	0	0	0	0	0	0	0	0	0	0	0	0	0	0	0	0	0	0	0	0	0	0	0	0	0	0	0	0	0	0	0	0	0	0	0	0	0	0	0	0	0	0	0	0	0	0	0	0	0
PTGER3	0	0	0	0	0	0	0	0	0	0	0	0	0	0	0	0	0	0	0	0	0	0	0	0	0	0	0	0	0	0	0	0	0	0	0	0	0	0	0	0	0	0	0	0	0	0	0	0	0
PTGER4	0	0	4	0.00973236	27	0.0249077	4	0.013468	0	0	14	0.023569	1	0.00549451	1	0.0017094	1	0.00191205	6	0.0923077	9	0.0175781	11	0.0214008	2	0.00537634	1	0.00176678	4	0.00821355	3	0.0344828	10	0.017094	1	0.00543478	17	0.034413	2	0.00784314	3	0.00678733	4	0.00909091	0	0	16	0.0320641	0
PTK2	0	0	0	0	0	0	0	0	0	0	0	0	0	0	0	0	0	0	0	0	0	0	0	0	0	0	0	0	1	0.00205339	0	0	0	0	0	0	0	0	0	0	0	0	0	0	0	0	1	0.00200401	5
PTK7	0	0	4	0.00973236	0	0	3	0.010101	0	0	6	0.010101	0	0	0	0	0	0	1	0.0153846	0	0	0	0	0	0	3	0.00530035	0	0	0	0	3	0.00512821	0	0	4	0.00809717	0	0	0	0	0	0	0	0	0	0	0
PTPN6	0	0	0	0	0	0	0	0	0	0	0	0	0	0	1	0.0017094	0	0	0	0	0	0	1	0.00194553	1	0.00268817	0	0	0	0	0	0	0	0	0	0	0	0	0	0	0	0	0	0	0	0	1	0.00200401	0
PTPRJ	0	0	0	0	0	0	0	0	0	0	0	0	0	0	0	0	0	0	0	0	0	0	0	0	0	0	0	0	0	0	0	0	0	0	0	0	0	0	0	0	0	0	0	0	0	0	0	0	0
RAB27A	0	0	0	0	0	0	3	0.010101	0	0	1	0.0016835	0	0	0	0	2	0.00382409	0	0	0	0	0	0	0	0	0	0	0	0	0	0	0	0	0	0	0	0	0	0	0	0	0	0	0	0	0	0	0
RAB3A	0	0	0	0	0	0	0	0	0	0	0	0	0	0	1	0.0017094	0	0	0	0	0	0	0	0	0	0	3	0.00530035	4	0.00821355	2	0.0229885	1	0.0017094	8	0.0434783	0	0	0	0	0	0	0	0	0	0	0	0	3
RAP2B	0	0	0	0	0	0	0	0	0	0	0	0	0	0	0	0	0	0	0	0	0	0	0	0	0	0	0	0	0	0	0	0	0	0	0	0	0	0	0	0	0	0	0	0	0	0	0	0	0
REG3A	0	0	0	0	0	0	0	0	0	0	0	0	0	0	0	0	0	0	0	0	0	0	0	0	0	0	0	0	0	0	0	0	0	0	0	0	0	0	0	0	0	0	0	0	0	0	0	0	0
REG3G	0	0	0	0	31	0.0285978	0	0	1	0.0277778	18	0.030303	0	0	0	0	0	0	0	0	13	0.0253906	0	0	0	0	5	0.00883392	5	0.0102669	2	0.0229885	4	0.00683761	6	0.0326087	6	0.0121457	1	0.00392157	2	0.00452489	3	0.00681818	1	0.00671141	15	0.0300601	0
RREB1	0	0	0	0	0	0	0	0	0	0	0	0	0	0	0	0	0	0	0	0	0	0	0	0	0	0	0	0	0	0	0	0	0	0	0	0	0	0	0	0	0	0	0	0	0	0	0	0	0
S100A9	0	0	0	0	0	0	0	0	0	0	0	0	0	0	0	0	0	0	0	0	0	0	0	0	0	0	0	0	0	0	0	0	0	0	0	0	0	0	0	0	0	0	0	0	0	0	0	0	0
SCNN1B	0	0	0	0	0	0	0	0	0	0	0	0	0	0	0	0	0	0	0	0	0	0	0	0	0	0	0	0	0	0	0	0	0	0	0	0	0	0	0	0	0	0	0	0	0	0	0	0	0
SCNN1G	0	0	2	0.00486618	0	0	1	0.003367	1	0.0277778	6	0.010101	0	0	4	0.00683761	5	0.00956023	1	0.0153846	6	0.0117188	2	0.00389105	5	0.0134409	4	0.00706714	1	0.00205339	0	0	1	0.0017094	2	0.0108696	10	0.0202429	2	0.00784314	5	0.0113122	5	0.0113636	0	0	6	0.012024	1
SCRIB	0	0	0	0	0	0	0	0	0	0	2	0.003367	0	0	0	0	0	0	0	0	0	0	0	0	0	0	0	0	0	0	0	0	0	0	0	0	0	0	0	0	0	0	0	0	0	0	0	0	0
SDC1	0	0	0	0	0	0	0	0	1	0.0277778	0	0	0	0	0	0	0	0	0	0	0	0	0	0	0	0	0	0	0	0	0	0	0	0	1	0.00543478	0	0	0	0	0	0	0	0	0	0	0	0	0
SDC4	0	0	0	0	0	0	0	0	0	0	0	0	0	0	0	0	0	0	0	0	0	0	0	0	0	0	0	0	0	0	0	0	0	0	0	0	0	0	0	0	0	0	0	0	0	0	0	0	0
SELP	0	0	0	0	0	0	0	0	0	0	0	0	0	0	0	0	0	0	0	0	0	0	0	0	0	0	0	0	0	0	0	0	0	0	0	0	0	0	0	0	0	0	0	0	0	0	0	0	0
SERPINA10	0	0	0	0	0	0	0	0	0	0	0	0	0	0	0	0	0	0	0	0	0	0	0	0	0	0	0	0	0	0	0	0	0	0	0	0	0	0	0	0	0	0	0	0	0	0	0	0	0
SERPINB2	0	0	0	0	0	0	0	0	0	0	0	0	0	0	0	0	0	0	0	0	0	0	0	0	0	0	0	0	0	0	0	0	0	0	0	0	0	0	0	0	0	0	0	0	0	0	0	0	0
SERPINC1	0	0	0	0	0	0	0	0	0	0	0	0	0	0	0	0	0	0	0	0	0	0	0	0	11	0.0295699	0	0	0	0	0	0	0	0	0	0	0	0	0	0	0	0	0	0	0	0	0	0	0
SERPIND1	0	0	0	0	0	0	0	0	0	0	0	0	0	0	0	0	0	0	0	0	0	0	0	0	0	0	0	0	0	0	0	0	0	0	0	0	0	0	0	0	0	0	0	0	0	0	0	0	0
SERPINE1	0	0	0	0	0	0	0	0	0	0	0	0	0	0	0	0	0	0	0	0	0	0	0	0	0	0	0	0	0	0	0	0	0	0	0	0	0	0	0	0	0	0	0	0	0	0	0	0	0
SERPINE2	0	0	0	0	0	0	0	0	0	0	0	0	0	0	0	0	0	0	0	0	0	0	0	0	0	0	0	0	0	0	0	0	0	0	0	0	0	0	0	0	0	0	0	0	0	0	0	0	0
SERPINF2	0	0	0	0	0	0	0	0	3	0.0833333	0	0	0	0	0	0	0	0	0	0	0	0	0	0	0	0	0	0	0	0	0	0	1	0.0017094	0	0	0	0	0	0	0	0	0	0	0	0	0	0	0
SERPING1	0	0	0	0	1	0.000922509	0	0	0	0	0	0	0	0	0	0	0	0	0	0	2	0.00390625	0	0	0	0	0	0	0	0	0	0	0	0	1	0.00543478	0	0	0	0	0	0	0	0	0	0	3	0.00601202	0
SH2B3	0	0	0	0	0	0	0	0	0	0	0	0	0	0	0	0	0	0	0	0	0	0	0	0	0	0	0	0	0	0	0	0	0	0	0	0	0	0	0	0	0	0	0	0	0	0	0	0	0
SHH	0	0	0	0	0	0	0	0	0	0	0	0	0	0	0	0	0	0	0	0	0	0	0	0	0	0	0	0	0	0	0	0	0	0	0	0	0	0	0	0	0	0	0	0	0	0	0	0	0
SLC11A1	0	0	0	0	0	0	0	0	0	0	0	0	0	0	0	0	0	0	0	0	0	0	0	0	0	0	0	0	0	0	0	0	0	0	0	0	0	0	0	0	0	0	0	0	0	0	0	0	0
SLC12A2	0	0	0	0	0	0	0	0	0	0	0	0	0	0	0	0	0	0	0	0	0	0	0	0	0	0	0	0	0	0	0	0	0	0	0	0	0	0	0	0	0	0	0	0	0	0	0	0	0
SLC4A1	0	0	0	0	0	0	0	0	0	0	0	0	0	0	0	0	0	0	0	0	0	0	0	0	0	0	0	0	0	0	0	0	0	0	0	0	0	0	0	0	0	0	0	0	0	0	0	0	0
SLC7A11	0	0	0	0	0	0	0	0	0	0	15	0.0252525	0	0	0	0	1	0.00191205	0	0	3	0.00585938	0	0	0	0	0	0	0	0	0	0	2	0.0034188	0	0	3	0.00607287	0	0	0	0	0	0	2	0.0134228	2	0.00400802	0
SMAD3	0	0	36	0.0875912	72	0.0664207	22	0.0740741	1	0.0277778	108	0.181818	20	0.10989	5	0.00854701	29	0.0554493	3	0.0461538	22	0.0429688	33	0.0642023	16	0.0430108	47	0.0830389	28	0.0574949	0	0	55	0.0940171	48	0.26087	44	0.0890688	0	0	21	0.0475113	50	0.113636	0	0	10	0.0200401	4
SMAD4	1	0.0114943	0	0	0	0	0	0	0	0	0	0	0	0	0	0	0	0	0	0	0	0	0	0	0	0	0	0	0	0	0	0	0	0	0	0	0	0	0	0	0	0	0	0	0	0	0	0	0
SMOC2	0	0	0	0	0	0	0	0	0	0	0	0	0	0	0	0	0	0	0	0	0	0	0	0	0	0	0	0	0	0	0	0	0	0	0	0	0	0	0	0	0	0	0	0	0	0	0	0	0
SNAI2	0	0	0	0	0	0	0	0	0	0	1	0.0016835	0	0	0	0	4	0.00764818	0	0	0	0	0	0	0	0	8	0.0141343	4	0.00821355	0	0	16	0.0273504	0	0	1	0.00202429	0	0	5	0.0113122	0	0	0	0	0	0	8
SRF	0	0	0	0	17	0.0156827	5	0.016835	0	0	0	0	2	0.010989	1	0.0017094	1	0.00191205	2	0.0307692	0	0	1	0.00194553	0	0	4	0.00706714	2	0.00410678	0	0	5	0.00854701	1	0.00543478	2	0.00404858	0	0	4	0.00904977	4	0.00909091	0	0	2	0.00400802	3
SRSF6	0	0	0	0	0	0	0	0	0	0	0	0	0	0	0	0	0	0	0	0	0	0	0	0	0	0	0	0	0	0	0	0	0	0	0	0	0	0	0	0	0	0	0	0	0	0	0	0	0
ST3GAL4	0	0	0	0	0	0	0	0	0	0	0	0	0	0	0	0	0	0	0	0	8	0.015625	0	0	0	0	0	0	0	0	0	0	0	0	1	0.00543478	0	0	0	0	0	0	0	0	0	0	0	0	0
STARD13	0	0	0	0	0	0	0	0	0	0	0	0	0	0	0	0	0	0	0	0	0	0	0	0	0	0	0	0	0	0	0	0	0	0	0	0	0	0	0	0	0	0	0	0	0	0	1	0.00200401	0
STXBP1	0	0	9	0.0218978	40	0.0369004	6	0.020202	1	0.0277778	25	0.0420875	5	0.0274725	4	0.00683761	14	0.0267686	0	0	2	0.00390625	38	0.07393	9	0.0241935	27	0.0477032	28	0.0574949	9	0.103448	9	0.0153846	11	0.0597826	7	0.01417	4	0.0156863	22	0.0497738	6	0.0136364	3	0.0201342	21	0.0420842	5
STXBP3	4	0.045977	0	0	0	0	0	0	0	0	3	0.00505051	0	0	0	0	0	0	0	0	0	0	0	0	0	0	12	0.0212014	0	0	0	0	0	0	7	0.0380435	0	0	0	0	0	0	0	0	0	0	7	0.0140281	0
SYK	0	0	0	0	0	0	0	0	0	0	0	0	0	0	0	0	0	0	0	0	0	0	0	0	0	0	0	0	0	0	0	0	0	0	0	0	7	0.01417	0	0	0	0	0	0	0	0	0	0	0
SYT11	0	0	0	0	0	0	0	0	0	0	0	0	0	0	9	0.0153846	0	0	0	0	0	0	16	0.0311284	0	0	0	0	0	0	0	0	0	0	0	0	0	0	0	0	0	0	0	0	0	0	0	0	0
SYT7	0	0	0	0	0	0	0	0	0	0	0	0	0	0	0	0	0	0	0	0	0	0	0	0	0	0	0	0	0	0	0	0	0	0	4	0.0217391	0	0	0	0	0	0	0	0	0	0	0	0	0
SYTL4	0	0	0	0	0	0	0	0	0	0	0	0	0	0	0	0	0	0	0	0	0	0	0	0	0	0	0	0	0	0	0	0	0	0	0	0	0	0	0	0	0	0	0	0	0	0	0	0	0
TBXA2R	0	0	0	0	0	0	0	0	0	0	0	0	0	0	0	0	0	0	0	0	0	0	0	0	0	0	0	0	0	0	0	0	0	0	0	0	0	0	0	0	0	0	0	0	0	0	0	0	0
TFPI	0	0	0	0	0	0	0	0	0	0	0	0	0	0	0	0	0	0	0	0	0	0	0	0	0	0	0	0	0	0	0	0	0	0	0	0	0	0	0	0	0	0	0	0	0	0	0	0	0
TFPI2	0	0	0	0	0	0	0	0	0	0	0	0	0	0	0	0	0	0	0	0	0	0	0	0	0	0	0	0	0	0	0	0	0	0	0	0	0	0	0	0	0	0	0	0	0	0	0	0	0
TGFB1	0	0	0	0	0	0	0	0	0	0	0	0	0	0	0	0	0	0	0	0	0	0	0	0	0	0	0	0	0	0	0	0	0	0	1	0.00543478	0	0	0	0	0	0	0	0	0	0	4	0.00801603	0
TGFB2	0	0	0	0	0	0	0	0	0	0	0	0	0	0	0	0	0	0	0	0	0	0	0	0	0	0	0	0	0	0	0	0	0	0	0	0	0	0	0	0	0	0	0	0	0	0	0	0	0
THBD	0	0	0	0	0	0	0	0	0	0	0	0	0	0	0	0	0	0	0	0	0	0	0	0	0	0	0	0	0	0	0	0	0	0	0	0	0	0	0	0	0	0	0	0	0	0	0	0	0
THBS1	0	0	0	0	0	0	0	0	0	0	0	0	0	0	0	0	0	0	0	0	0	0	0	0	0	0	0	0	0	0	0	0	0	0	0	0	0	0	0	0	0	0	0	0	0	0	0	0	0
TIMP1	0	0	0	0	0	0	0	0	0	0	0	0	0	0	0	0	0	0	0	0	0	0	0	0	0	0	0	0	0	0	0	0	0	0	0	0	0	0	0	0	0	0	0	0	0	0	0	0	0
TLR4	0	0	0	0	0	0	0	0	0	0	0	0	0	0	0	0	0	0	0	0	0	0	0	0	0	0	0	0	0	0	0	0	0	0	0	0	0	0	0	0	0	0	0	0	0	0	0	0	0
TMEFF2	0	0	0	0	0	0	0	0	0	0	0	0	0	0	0	0	0	0	0	0	0	0	0	0	0	0	0	0	0	0	0	0	0	0	0	0	0	0	0	0	0	0	0	0	0	0	0	0	0
TNF	0	0	0	0	0	0	0	0	0	0	0	0	0	0	0	0	0	0	0	0	0	0	0	0	0	0	0	0	0	0	0	0	0	0	0	0	0	0	0	0	0	0	0	0	0	0	0	0	0
TNFRSF12A	0	0	0	0	0	0	0	0	0	0	0	0	0	0	0	0	0	0	0	0	0	0	0	0	0	0	0	0	0	0	0	0	0	0	0	0	0	0	0	0	0	0	0	0	0	0	0	0	0
TOR1A	0	0	39	0.0948905	62	0.0571956	3	0.010101	1	0.0277778	16	0.026936	2	0.010989	10	0.017094	5	0.00956023	6	0.0923077	22	0.0429688	15	0.0291829	12	0.0322581	14	0.024735	34	0.0698152	10	0.114943	14	0.0239316	10	0.0543478	13	0.0263158	15	0.0588235	25	0.0565611	3	0.00681818	2	0.0134228	13	0.0260521	3
TPM1	0	0	0	0	0	0	0	0	0	0	0	0	0	0	0	0	0	0	0	0	3	0.00585938	0	0	0	0	0	0	0	0	0	0	0	0	0	0	0	0	0	0	0	0	0	0	0	0	0	0	0
TPSAB1	0	0	0	0	0	0	0	0	0	0	0	0	0	0	0	0	0	0	0	0	0	0	0	0	0	0	0	0	0	0	0	0	0	0	0	0	0	0	0	0	0	0	0	0	0	0	0	0	0
TREML1	0	0	0	0	0	0	0	0	0	0	0	0	0	0	0	0	0	0	0	0	0	0	0	0	0	0	0	0	0	0	0	0	0	0	0	0	0	0	0	0	0	0	0	0	0	0	0	0	0
TRIM72	0	0	0	0	0	0	0	0	0	0	0	0	0	0	0	0	0	0	0	0	0	0	0	0	0	0	0	0	0	0	0	0	0	0	0	0	0	0	0	0	0	0	0	0	0	0	0	0	0
TSPAN32	0	0	0	0	0	0	0	0	0	0	0	0	0	0	0	0	0	0	0	0	0	0	0	0	0	0	0	0	0	0	0	0	0	0	0	0	0	0	0	0	0	0	0	0	0	0	0	0	0
TSPAN8	0	0	0	0	0	0	0	0	0	0	0	0	0	0	0	0	0	0	0	0	0	0	0	0	0	0	0	0	0	0	0	0	0	0	0	0	0	0	0	0	0	0	0	0	0	0	0	0	0
TXK	0	0	0	0	0	0	0	0	0	0	0	0	0	0	0	0	0	0	0	0	0	0	0	0	0	0	0	0	0	0	0	0	0	0	0	0	0	0	0	0	0	0	0	0	0	0	0	0	0
TYRO3	0	0	0	0	0	0	1	0.003367	0	0	0	0	0	0	0	0	0	0	0	0	0	0	0	0	0	0	0	0	0	0	0	0	0	0	1	0.00543478	0	0	0	0	0	0	0	0	0	0	0	0	0
UBASH3A	0	0	0	0	0	0	0	0	0	0	0	0	0	0	0	0	0	0	0	0	0	0	0	0	0	0	0	0	0	0	0	0	0	0	0	0	0	0	0	0	0	0	0	0	0	0	0	0	0
UBASH3B	0	0	0	0	0	0	0	0	0	0	0	0	0	0	0	0	0	0	0	0	0	0	0	0	0	0	0	0	0	0	0	0	0	0	0	0	0	0	0	0	0	0	0	0	0	0	0	0	0
VANGL2	0	0	0	0	0	0	0	0	0	0	0	0	0	0	1	0.0017094	0	0	0	0	0	0	17	0.0330739	0	0	0	0	0	0	0	0	0	0	0	0	0	0	0	0	0	0	0	0	0	0	1	0.00200401	0
VEGFA	0	0	0	0	0	0	0	0	0	0	0	0	0	0	0	0	0	0	3	0.0461538	0	0	0	0	0	0	0	0	0	0	0	0	0	0	0	0	0	0	0	0	0	0	0	0	0	0	0	0	0
VEGFB	1	0.0114943	0	0	0	0	0	0	2	0.0555556	0	0	0	0	1	0.0017094	0	0	1	0.0153846	0	0	0	0	0	0	4	0.00706714	1	0.00205339	0	0	6	0.0102564	2	0.0108696	2	0.00404858	0	0	0	0	0	0	0	0	0	0	0
VIL1	0	0	0	0	0	0	0	0	0	0	3	0.00505051	0	0	0	0	0	0	0	0	0	0	0	0	0	0	0	0	0	0	0	0	0	0	0	0	0	0	0	0	0	0	0	0	0	0	0	0	0
VKORC1	0	0	0	0	0	0	0	0	0	0	0	0	0	0	0	0	0	0	0	0	0	0	0	0	0	0	0	0	0	0	0	0	3	0.00512821	0	0	1	0.00202429	0	0	0	0	0	0	0	0	0	0	0
VPS33B	1	0.0114943	10	0.0243309	34	0.0313653	13	0.043771	0	0	47	0.0791246	6	0.032967	0	0	10	0.0191205	3	0.0461538	10	0.0195312	18	0.0350195	14	0.0376344	19	0.0335689	7	0.0143737	3	0.0344828	12	0.0205128	6	0.0326087	13	0.0263158	5	0.0196078	0	0	10	0.0227273	4	0.0268456	11	0.0220441	3
VWF	0	0	0	0	0	0	0	0	0	0	0	0	0	0	0	0	0	0	0	0	0	0	0	0	0	0	0	0	0	0	0	0	0	0	0	0	0	0	0	0	0	0	0	0	0	0	0	0	0
WFDC1	0	0	0	0	0	0	0	0	0	0	0	0	0	0	0	0	0	0	0	0	0	0	0	0	0	0	0	0	0	0	0	0	0	0	0	0	0	0	0	0	0	0	0	0	0	0	0	0	0
WNT3A	0	0	0	0	0	0	0	0	0	0	0	0	0	0	0	0	0	0	0	0	0	0	0	0	0	0	0	0	0	0	0	0	0	0	0	0	0	0	0	0	0	0	0	0	0	0	0	0	0
WNT4	0	0	0	0	0	0	0	0	0	0	0	0	0	0	0	0	0	0	0	0	0	0	0	0	0	0	0	0	0	0	0	0	0	0	0	0	0	0	0	0	0	0	0	0	0	0	0	0	0
WNT5A	0	0	0	0	0	0	0	0	0	0	0	0	0	0	0	0	0	0	0	0	0	0	0	0	0	0	0	0	0	0	0	0	0	0	0	0	0	0	0	0	0	0	0	0	0	0	0	0	0
WNT7A	0	0	0	0	0	0	0	0	0	0	0	0	0	0	0	0	0	0	0	0	0	0	0	0	0	0	0	0	0	0	0	0	0	0	0	0	0	0	0	0	0	0	0	0	0	0	0	0	0
XBP1	0	0	0	0	0	0	0	0	0	0	0	0	0	0	1	0.0017094	0	0	1	0.0153846	0	0	0	0	10	0.0268817	0	0	0	0	2	0.0229885	0	0	0	0	0	0	0	0	0	0	0	0	0	0	0	0	0
YAP1	0	0	1	0.00243309	30	0.0276753	10	0.03367	1	0.0277778	5	0.00841751	3	0.0164835	0	0	19	0.0363289	1	0.0153846	4	0.0078125	0	0	0	0	13	0.0229682	17	0.0349076	2	0.0229885	5	0.00854701	10	0.0543478	14	0.0283401	0	0	4	0.00904977	2	0.00454545	0	0	11	0.0220441	0
[truncated: 8 more columns]

## Sheet: ST8
Supplementary Table 8. Mean frequency of protein high alteration per TCGA Pan-Cancer type
Genes	ACC		BLCA		BRCA		CESC		CHOL		COAD		ESCA		GBM		HNSC		KICH		KIRC		LGG		LIHC		LUAD		LUSC		MESO		OV		PAAD		PRAD		SARC		SKCM		STAD		TGCT		THCA		THYM
	N = 87	f	N = 411	f	N = 1084	f	N = 297	f	N = 36	f	N = 594	f	N = 182	f	N = 585	f	N = 523	f	N = 65	f	N = 512	f	N = 514	f	N = 372	f	N = 566	f	N = 487	f	N = 87	f	N = 585	f	N = 184	f	N = 494	f	N = 255	f	N = 442	f	N = 440	f	N = 149	f	N = 499	f	N = 123
ABAT	0	0	0	0	0	0	0	0	0	0	0	0	0	0	0	0	0	0	0	0	0	0	0	0	0	0	0	0	0	0	0	0	0	0	0	0	0	0	0	0	0	0	0	0	0	0	0	0	0
ABCC8	0	0	0	0	0	0	0	0	0	0	0	0	0	0	0	0	0	0	0	0	0	0	0	0	0	0	0	0	0	0	0	0	0	0	0	0	0	0	0	0	0	0	0	0	0	0	0	0	0
ACTA2	0	0	0	0	0	0	0	0	0	0	0	0	0	0	0	0	0	0	0	0	0	0	0	0	0	0	0	0	0	0	0	0	0	0	0	0	0	0	0	0	0	0	0	0	0	0	0	0	0
ACTG1	0	0	0	0	0	0	0	0	0	0	0	0	0	0	0	0	0	0	0	0	0	0	0	0	0	0	0	0	0	0	0	0	0	0	0	0	0	0	0	0	0	0	0	0	0	0	0	0	0
ACVRL1	0	0	18	0.0437956	35	0.0322878	10	0.03367	1	0.0277778	18	0.030303	4	0.021978	7	0.0119658	8	0.0152964	1	0.0153846	16	0.03125	10	0.0194553	1	0.00268817	6	0.0106007	14	0.0287474	2	0.0229885	17	0.0290598	3	0.0163043	11	0.0222672	5	0.0196078	17	0.0384615	12	0.0272727	4	0.0268456	23	0.0460922	5
ADAMTS13	0	0	0	0	0	0	0	0	0	0	0	0	0	0	0	0	0	0	0	0	0	0	0	0	0	0	0	0	0	0	0	0	0	0	0	0	0	0	0	0	0	0	0	0	0	0	0	0	0
ADAMTS18	0	0	0	0	0	0	0	0	0	0	0	0	0	0	0	0	0	0	0	0	0	0	0	0	0	0	0	0	0	0	0	0	0	0	0	0	0	0	0	0	0	0	0	0	0	0	0	0	0
ADIPOR2	0	0	0	0	0	0	0	0	0	0	0	0	0	0	0	0	0	0	0	0	0	0	0	0	0	0	0	0	0	0	0	0	0	0	0	0	0	0	0	0	0	0	0	0	0	0	0	0	0
ADRA2A	0	0	0	0	0	0	0	0	0	0	0	0	0	0	0	0	0	0	0	0	0	0	0	0	0	0	0	0	0	0	0	0	0	0	0	0	0	0	0	0	0	0	0	0	0	0	0	0	0
ADRA2C	0	0	0	0	0	0	0	0	0	0	0	0	0	0	0	0	0	0	0	0	0	0	0	0	0	0	0	0	0	0	0	0	0	0	0	0	0	0	0	0	0	0	0	0	0	0	0	0	0
ADRB1	0	0	0	0	0	0	0	0	0	0	0	0	0	0	0	0	0	0	0	0	0	0	0	0	0	0	0	0	0	0	0	0	0	0	0	0	0	0	0	0	0	0	0	0	0	0	0	0	0
ADRB2	0	0	0	0	0	0	0	0	0	0	0	0	0	0	0	0	0	0	0	0	0	0	0	0	0	0	0	0	0	0	0	0	0	0	0	0	0	0	0	0	0	0	0	0	0	0	0	0	0
ADTRP	0	0	0	0	0	0	0	0	0	0	0	0	0	0	0	0	0	0	0	0	0	0	0	0	0	0	0	0	0	0	0	0	0	0	0	0	0	0	0	0	0	0	0	0	0	0	0	0	0
AGER	0	0	0	0	0	0	0	0	0	0	0	0	0	0	0	0	0	0	0	0	0	0	0	0	0	0	0	0	0	0	0	0	0	0	0	0	0	0	0	0	0	0	0	0	0	0	0	0	0
AHNAK2	0	0	0	0	0	0	0	0	0	0	0	0	0	0	0	0	0	0	0	0	0	0	0	0	0	0	0	0	0	0	0	0	0	0	0	0	0	0	0	0	0	0	0	0	0	0	0	0	0
AJAP1	0	0	0	0	0	0	0	0	0	0	0	0	0	0	0	0	0	0	0	0	0	0	0	0	0	0	0	0	0	0	0	0	0	0	0	0	0	0	0	0	0	0	0	0	0	0	0	0	0
AJUBA	0	0	0	0	0	0	0	0	0	0	0	0	0	0	0	0	0	0	0	0	0	0	0	0	0	0	0	0	0	0	0	0	0	0	0	0	0	0	0	0	0	0	0	0	0	0	0	0	0
ALOX12	0	0	0	0	0	0	0	0	0	0	0	0	0	0	0	0	0	0	0	0	0	0	0	0	0	0	0	0	0	0	0	0	0	0	0	0	0	0	0	0	0	0	0	0	0	0	0	0	0
ALOX15	0	0	0	0	0	0	0	0	0	0	0	0	0	0	0	0	0	0	0	0	0	0	0	0	0	0	0	0	0	0	0	0	0	0	0	0	0	0	0	0	0	0	0	0	0	0	0	0	0
ALOX5	0	0	0	0	0	0	0	0	0	0	0	0	0	0	0	0	0	0	0	0	0	0	0	0	0	0	0	0	0	0	0	0	0	0	0	0	0	0	0	0	0	0	0	0	0	0	0	0	0
ANO6	0	0	0	0	0	0	0	0	0	0	0	0	0	0	0	0	0	0	0	0	0	0	0	0	0	0	0	0	0	0	0	0	0	0	0	0	0	0	0	0	0	0	0	0	0	0	0	0	0
ANXA1	1	0.0114943	7	0.0170316	25	0.0230627	3	0.010101	1	0.0277778	11	0.0185185	8	0.043956	3	0.00512821	7	0.0133843	2	0.0307692	5	0.00976562	17	0.0330739	1	0.00268817	13	0.0229682	10	0.0205339	1	0.0114943	6	0.0102564	2	0.0108696	13	0.0263158	4	0.0156863	6	0.0135747	13	0.0295455	5	0.033557	0	0	3
ANXA2	0	0	0	0	0	0	0	0	0	0	0	0	0	0	0	0	0	0	0	0	0	0	0	0	0	0	0	0	0	0	0	0	0	0	0	0	0	0	0	0	0	0	0	0	0	0	0	0	0
ANXA5	0	0	0	0	0	0	0	0	0	0	0	0	0	0	0	0	0	0	0	0	0	0	0	0	0	0	0	0	0	0	0	0	0	0	0	0	0	0	0	0	0	0	0	0	0	0	0	0	0
ANXA6	0	0	0	0	0	0	0	0	0	0	0	0	0	0	0	0	0	0	0	0	0	0	0	0	0	0	0	0	0	0	0	0	0	0	0	0	0	0	0	0	0	0	0	0	0	0	0	0	0
ANXA8	0	0	0	0	0	0	0	0	0	0	0	0	0	0	0	0	0	0	0	0	0	0	0	0	0	0	0	0	0	0	0	0	0	0	0	0	0	0	0	0	0	0	0	0	0	0	0	0	0
AP3B1	0	0	0	0	0	0	0	0	0	0	0	0	0	0	0	0	0	0	0	0	0	0	0	0	0	0	0	0	0	0	0	0	0	0	0	0	0	0	0	0	0	0	0	0	0	0	0	0	0
APOE	0	0	0	0	0	0	0	0	0	0	0	0	0	0	0	0	0	0	0	0	0	0	0	0	0	0	0	0	0	0	0	0	0	0	0	0	0	0	0	0	0	0	0	0	0	0	0	0	0
APOH	0	0	0	0	0	0	0	0	0	0	0	0	0	0	0	0	0	0	0	0	0	0	0	0	0	0	0	0	0	0	0	0	0	0	0	0	0	0	0	0	0	0	0	0	0	0	0	0	0
AQP1	0	0	0	0	0	0	0	0	0	0	0	0	0	0	0	0	0	0	0	0	0	0	0	0	0	0	0	0	0	0	0	0	0	0	0	0	0	0	0	0	0	0	0	0	0	0	0	0	0
ARFGEF1	0	0	0	0	0	0	0	0	0	0	0	0	0	0	0	0	0	0	0	0	0	0	0	0	0	0	0	0	0	0	0	0	0	0	0	0	0	0	0	0	0	0	0	0	0	0	0	0	0
ARHGAP24	0	0	0	0	0	0	0	0	0	0	0	0	0	0	0	0	0	0	0	0	0	0	0	0	0	0	0	0	0	0	0	0	0	0	0	0	0	0	0	0	0	0	0	0	0	0	0	0	0
ARHGAP35	0	0	0	0	0	0	0	0	0	0	0	0	0	0	0	0	0	0	0	0	0	0	0	0	0	0	0	0	0	0	0	0	0	0	0	0	0	0	0	0	0	0	0	0	0	0	0	0	0
ARHGEF19	0	0	0	0	0	0	0	0	0	0	0	0	0	0	0	0	0	0	0	0	0	0	0	0	0	0	0	0	0	0	0	0	0	0	0	0	0	0	0	0	0	0	0	0	0	0	0	0	0
AXL	0	0	0	0	0	0	0	0	0	0	0	0	0	0	0	0	0	0	0	0	0	0	0	0	0	0	0	0	0	0	0	0	0	0	0	0	0	0	0	0	0	0	0	0	0	0	0	0	0
B4GALT1	0	0	0	0	0	0	0	0	0	0	0	0	0	0	0	0	0	0	0	0	0	0	0	0	0	0	0	0	0	0	0	0	0	0	0	0	0	0	0	0	0	0	0	0	0	0	0	0	0
BLK	0	0	0	0	0	0	0	0	0	0	0	0	0	0	0	0	0	0	0	0	0	0	0	0	0	0	0	0	0	0	0	0	0	0	0	0	0	0	0	0	0	0	0	0	0	0	0	0	0
BLOC1S3	0	0	0	0	0	0	0	0	0	0	0	0	0	0	0	0	0	0	0	0	0	0	0	0	0	0	0	0	0	0	0	0	0	0	0	0	0	0	0	0	0	0	0	0	0	0	0	0	0
BLOC1S4	0	0	0	0	0	0	0	0	0	0	0	0	0	0	0	0	0	0	0	0	0	0	0	0	0	0	0	0	0	0	0	0	0	0	0	0	0	0	0	0	0	0	0	0	0	0	0	0	0
BLOC1S6	0	0	0	0	0	0	0	0	0	0	0	0	0	0	0	0	0	0	0	0	0	0	0	0	0	0	0	0	0	0	0	0	0	0	0	0	0	0	0	0	0	0	0	0	0	0	0	0	0
BNC1	0	0	0	0	0	0	0	0	0	0	0	0	0	0	0	0	0	0	0	0	0	0	0	0	0	0	0	0	0	0	0	0	0	0	0	0	0	0	0	0	0	0	0	0	0	0	0	0	0
C1GALT1C1	0	0	0	0	0	0	0	0	0	0	0	0	0	0	0	0	0	0	0	0	0	0	0	0	0	0	0	0	0	0	0	0	0	0	0	0	0	0	0	0	0	0	0	0	0	0	0	0	0
C1QTNF1	0	0	0	0	0	0	0	0	0	0	0	0	0	0	0	0	0	0	0	0	0	0	0	0	0	0	0	0	0	0	0	0	0	0	0	0	0	0	0	0	0	0	0	0	0	0	0	0	0
C3	0	0	0	0	0	0	0	0	0	0	0	0	0	0	0	0	0	0	0	0	0	0	0	0	0	0	0	0	0	0	0	0	0	0	0	0	0	0	0	0	0	0	0	0	0	0	0	0	0
C9	0	0	0	0	0	0	0	0	0	0	0	0	0	0	0	0	0	0	0	0	0	0	0	0	0	0	0	0	0	0	0	0	0	0	0	0	0	0	0	0	0	0	0	0	0	0	0	0	0
CADM4	0	0	0	0	0	0	0	0	0	0	0	0	0	0	0	0	0	0	0	0	0	0	0	0	0	0	0	0	0	0	0	0	0	0	0	0	0	0	0	0	0	0	0	0	0	0	0	0	0
CARMIL2	0	0	0	0	0	0	0	0	0	0	0	0	0	0	0	0	0	0	0	0	0	0	0	0	0	0	0	0	0	0	0	0	0	0	0	0	0	0	0	0	0	0	0	0	0	0	0	0	0
CASK	0	0	0	0	0	0	0	0	0	0	0	0	0	0	0	0	0	0	0	0	0	0	0	0	0	0	0	0	0	0	0	0	0	0	0	0	0	0	0	0	0	0	0	0	0	0	0	0	0
CAV1	1	0.0114943	11	0.026764	31	0.0285978	7	0.023569	2	0.0555556	18	0.030303	3	0.0164835	13	0.0222222	4	0.00764818	1	0.0153846	9	0.0175781	27	0.0525292	4	0.0107527	6	0.0106007	12	0.0246407	3	0.0344828	15	0.025641	4	0.0217391	2	0.00404858	0	0	15	0.0339367	7	0.0159091	4	0.0268456	11	0.0220441	1
CAV3	0	0	0	0	0	0	0	0	0	0	0	0	0	0	0	0	0	0	0	0	0	0	0	0	0	0	0	0	0	0	0	0	0	0	0	0	0	0	0	0	0	0	0	0	0	0	0	0	0
CCL2	0	0	0	0	0	0	0	0	0	0	0	0	0	0	0	0	0	0	0	0	0	0	0	0	0	0	0	0	0	0	0	0	0	0	0	0	0	0	0	0	0	0	0	0	0	0	0	0	0
CCM2L	0	0	0	0	0	0	0	0	0	0	0	0	0	0	0	0	0	0	0	0	0	0	0	0	0	0	0	0	0	0	0	0	0	0	0	0	0	0	0	0	0	0	0	0	0	0	0	0	0
CCN1	0	0	0	0	0	0	0	0	0	0	0	0	0	0	0	0	0	0	0	0	0	0	0	0	0	0	0	0	0	0	0	0	0	0	0	0	0	0	0	0	0	0	0	0	0	0	0	0	0
CCN4	0	0	0	0	0	0	0	0	0	0	0	0	0	0	0	0	0	0	0	0	0	0	0	0	0	0	0	0	0	0	0	0	0	0	0	0	0	0	0	0	0	0	0	0	0	0	0	0	0
CCR2	0	0	0	0	0	0	0	0	0	0	0	0	0	0	0	0	0	0	0	0	0	0	0	0	0	0	0	0	0	0	0	0	0	0	0	0	0	0	0	0	0	0	0	0	0	0	0	0	0
CD109	0	0	0	0	0	0	0	0	0	0	0	0	0	0	0	0	0	0	0	0	0	0	0	0	0	0	0	0	0	0	0	0	0	0	0	0	0	0	0	0	0	0	0	0	0	0	0	0	0
CD151	0	0	0	0	0	0	0	0	0	0	0	0	0	0	0	0	0	0	0	0	0	0	0	0	0	0	0	0	0	0	0	0	0	0	0	0	0	0	0	0	0	0	0	0	0	0	0	0	0
CD34	0	0	0	0	0	0	0	0	0	0	0	0	0	0	0	0	0	0	0	0	0	0	0	0	0	0	0	0	0	0	0	0	0	0	0	0	0	0	0	0	0	0	0	0	0	0	0	0	0
CD36	0	0	0	0	0	0	0	0	0	0	0	0	0	0	0	0	0	0	0	0	0	0	0	0	0	0	0	0	0	0	0	0	0	0	0	0	0	0	0	0	0	0	0	0	0	0	0	0	0
CD40LG	0	0	0	0	0	0	0	0	0	0	0	0	0	0	0	0	0	0	0	0	0	0	0	0	0	0	0	0	0	0	0	0	0	0	0	0	0	0	0	0	0	0	0	0	0	0	0	0	0
CD44	0	0	0	0	0	0	0	0	0	0	0	0	0	0	0	0	0	0	0	0	0	0	0	0	0	0	0	0	0	0	0	0	0	0	0	0	0	0	0	0	0	0	0	0	0	0	0	0	0
CD9	0	0	0	0	0	0	0	0	0	0	0	0	0	0	0	0	0	0	0	0	0	0	0	0	0	0	0	0	0	0	0	0	0	0	0	0	0	0	0	0	0	0	0	0	0	0	0	0	0
CDKN1A	0	0	10	0.0243309	19	0.0175277	2	0.00673401	1	0.0277778	6	0.010101	3	0.0164835	7	0.0119658	5	0.00956023	4	0.0615385	21	0.0410156	12	0.0233463	2	0.00537634	2	0.00353357	2	0.00410678	1	0.0114943	12	0.0205128	5	0.0271739	4	0.00809717	0	0	6	0.0135747	4	0.00909091	0	0	10	0.0200401	5
CEACAM1	0	0	0	0	0	0	0	0	0	0	0	0	0	0	0	0	0	0	0	0	0	0	0	0	0	0	0	0	0	0	0	0	0	0	0	0	0	0	0	0	0	0	0	0	0	0	0	0	0
CELA2A	0	0	0	0	0	0	0	0	0	0	0	0	0	0	0	0	0	0	0	0	0	0	0	0	0	0	0	0	0	0	0	0	0	0	0	0	0	0	0	0	0	0	0	0	0	0	0	0	0
CELSR1	0	0	0	0	0	0	0	0	0	0	0	0	0	0	0	0	0	0	0	0	0	0	0	0	0	0	0	0	0	0	0	0	0	0	0	0	0	0	0	0	0	0	0	0	0	0	0	0	0
CFH	0	0	0	0	0	0	0	0	0	0	0	0	0	0	0	0	0	0	0	0	0	0	0	0	0	0	0	0	0	0	0	0	0	0	0	0	0	0	0	0	0	0	0	0	0	0	0	0	0
CFLAR	0	0	0	0	0	0	0	0	0	0	0	0	0	0	0	0	0	0	0	0	0	0	0	0	0	0	0	0	0	0	0	0	0	0	0	0	0	0	0	0	0	0	0	0	0	0	0	0	0
CLASP1	0	0	0	0	0	0	0	0	0	0	0	0	0	0	0	0	0	0	0	0	0	0	0	0	0	0	0	0	0	0	0	0	0	0	0	0	0	0	0	0	0	0	0	0	0	0	0	0	0
CLASP2	0	0	0	0	0	0	0	0	0	0	0	0	0	0	0	0	0	0	0	0	0	0	0	0	0	0	0	0	0	0	0	0	0	0	0	0	0	0	0	0	0	0	0	0	0	0	0	0	0
CLDN1	0	0	0	0	0	0	0	0	0	0	0	0	0	0	0	0	0	0	0	0	0	0	0	0	0	0	0	0	0	0	0	0	0	0	0	0	0	0	0	0	0	0	0	0	0	0	0	0	0
CLDN19	0	0	0	0	0	0	0	0	0	0	0	0	0	0	0	0	0	0	0	0	0	0	0	0	0	0	0	0	0	0	0	0	0	0	0	0	0	0	0	0	0	0	0	0	0	0	0	0	0
CLDN3	0	0	0	0	0	0	0	0	0	0	0	0	0	0	0	0	0	0	0	0	0	0	0	0	0	0	0	0	0	0	0	0	0	0	0	0	0	0	0	0	0	0	0	0	0	0	0	0	0
CLDN4	0	0	0	0	0	0	0	0	0	0	0	0	0	0	0	0	0	0	0	0	0	0	0	0	0	0	0	0	0	0	0	0	0	0	0	0	0	0	0	0	0	0	0	0	0	0	0	0	0
CLEC10A	0	0	0	0	0	0	0	0	0	0	0	0	0	0	0	0	0	0	0	0	0	0	0	0	0	0	0	0	0	0	0	0	0	0	0	0	0	0	0	0	0	0	0	0	0	0	0	0	0
CNN2	0	0	0	0	0	0	0	0	0	0	0	0	0	0	0	0	0	0	0	0	0	0	0	0	0	0	0	0	0	0	0	0	0	0	0	0	0	0	0	0	0	0	0	0	0	0	0	0	0
COL1A1	0	0	0	0	0	0	0	0	0	0	0	0	0	0	0	0	0	0	0	0	0	0	0	0	0	0	0	0	0	0	0	0	0	0	0	0	0	0	0	0	0	0	0	0	0	0	0	0	0
COL3A1	0	0	0	0	0	0	0	0	0	0	0	0	0	0	0	0	0	0	0	0	0	0	0	0	0	0	0	0	0	0	0	0	0	0	0	0	0	0	0	0	0	0	0	0	0	0	0	0	0
COL5A1	0	0	0	0	0	0	0	0	0	0	0	0	0	0	0	0	0	0	0	0	0	0	0	0	0	0	0	0	0	0	0	0	0	0	0	0	0	0	0	0	0	0	0	0	0	0	0	0	0
COMP	0	0	0	0	0	0	0	0	0	0	0	0	0	0	0	0	0	0	0	0	0	0	0	0	0	0	0	0	0	0	0	0	0	0	0	0	0	0	0	0	0	0	0	0	0	0	0	0	0
CORO1B	0	0	0	0	0	0	0	0	0	0	0	0	0	0	0	0	0	0	0	0	0	0	0	0	0	0	0	0	0	0	0	0	0	0	0	0	0	0	0	0	0	0	0	0	0	0	0	0	0
CPB2	0	0	0	0	0	0	0	0	0	0	0	0	0	0	0	0	0	0	0	0	0	0	0	0	0	0	0	0	0	0	0	0	0	0	0	0	0	0	0	0	0	0	0	0	0	0	0	0	0
CRK	0	0	0	0	0	0	0	0	0	0	0	0	0	0	0	0	0	0	0	0	0	0	0	0	0	0	0	0	0	0	0	0	0	0	0	0	0	0	0	0	0	0	0	0	0	0	0	0	0
CRP	0	0	0	0	0	0	0	0	0	0	0	0	0	0	0	0	0	0	0	0	0	0	0	0	0	0	0	0	0	0	0	0	0	0	0	0	0	0	0	0	0	0	0	0	0	0	0	0	0
CX3CL1	0	0	0	0	0	0	0	0	0	0	0	0	0	0	0	0	0	0	0	0	0	0	0	0	0	0	0	0	0	0	0	0	0	0	0	0	0	0	0	0	0	0	0	0	0	0	0	0	0
CXADR	0	0	0	0	0	0	0	0	0	0	0	0	0	0	0	0	0	0	0	0	0	0	0	0	0	0	0	0	0	0	0	0	0	0	0	0	0	0	0	0	0	0	0	0	0	0	0	0	0
CXCR4	0	0	0	0	0	0	0	0	0	0	0	0	0	0	0	0	0	0	0	0	0	0	0	0	0	0	0	0	0	0	0	0	0	0	0	0	0	0	0	0	0	0	0	0	0	0	0	0	0
DCBLD2	0	0	0	0	0	0	0	0	0	0	0	0	0	0	0	0	0	0	0	0	0	0	0	0	0	0	0	0	0	0	0	0	0	0	0	0	0	0	0	0	0	0	0	0	0	0	0	0	0
DDR1	0	0	0	0	0	0	0	0	0	0	0	0	0	0	0	0	0	0	0	0	0	0	0	0	0	0	0	0	0	0	0	0	0	0	0	0	0	0	0	0	0	0	0	0	0	0	0	0	0
DMTN	0	0	0	0	0	0	0	0	0	0	0	0	0	0	0	0	0	0	0	0	0	0	0	0	0	0	0	0	0	0	0	0	0	0	0	0	0	0	0	0	0	0	0	0	0	0	0	0	0
DRD5	0	0	0	0	0	0	0	0	0	0	0	0	0	0	0	0	0	0	0	0	0	0	0	0	0	0	0	0	0	0	0	0	0	0	0	0	0	0	0	0	0	0	0	0	0	0	0	0	0
DSP	0	0	0	0	0	0	0	0	0	0	0	0	0	0	0	0	0	0	0	0	0	0	0	0	0	0	0	0	0	0	0	0	0	0	0	0	0	0	0	0	0	0	0	0	0	0	0	0	0
DST	0	0	0	0	0	0	0	0	0	0	0	0	0	0	0	0	0	0	0	0	0	0	0	0	0	0	0	0	0	0	0	0	0	0	0	0	0	0	0	0	0	0	0	0	0	0	0	0	0
DTNBP1	0	0	0	0	0	0	0	0	0	0	0	0	0	0	0	0	0	0	0	0	0	0	0	0	0	0	0	0	0	0	0	0	0	0	0	0	0	0	0	0	0	0	0	0	0	0	0	0	0
DUOX1	0	0	0	0	0	0	0	0	0	0	0	0	0	0	0	0	0	0	0	0	0	0	0	0	0	0	0	0	0	0	0	0	0	0	0	0	0	0	0	0	0	0	0	0	0	0	0	0	0
DUOX2	0	0	0	0	0	0	0	0	0	0	0	0	0	0	0	0	0	0	0	0	0	0	0	0	0	0	0	0	0	0	0	0	0	0	0	0	0	0	0	0	0	0	0	0	0	0	0	0	0
DUSP10	0	0	0	0	0	0	0	0	0	0	0	0	0	0	0	0	0	0	0	0	0	0	0	0	0	0	0	0	0	0	0	0	0	0	0	0	0	0	0	0	0	0	0	0	0	0	0	0	0
DYSF	0	0	0	0	0	0	0	0	0	0	0	0	0	0	0	0	0	0	0	0	0	0	0	0	0	0	0	0	0	0	0	0	0	0	0	0	0	0	0	0	0	0	0	0	0	0	0	0	0
EGFR	1	0.0114943	41	0.0997567	43	0.0396679	5	0.016835	1	0.0277778	16	0.026936	13	0.0714286	114	0.194872	25	0.0478011	4	0.0615385	28	0.0546875	45	0.0875486	17	0.0456989	45	0.0795053	29	0.0595483	4	0.045977	13	0.0222222	6	0.0326087	11	0.0222672	22	0.0862745	21	0.0475113	30	0.0681818	4	0.0268456	12	0.0240481	2
ELK3	0	0	0	0	0	0	0	0	0	0	0	0	0	0	0	0	0	0	0	0	0	0	0	0	0	0	0	0	0	0	0	0	0	0	0	0	0	0	0	0	0	0	0	0	0	0	0	0	0
ENG	0	0	0	0	0	0	0	0	0	0	0	0	0	0	0	0	0	0	0	0	0	0	0	0	0	0	0	0	0	0	0	0	0	0	0	0	0	0	0	0	0	0	0	0	0	0	0	0	0
ENPP4	0	0	0	0	0	0	0	0	0	0	0	0	0	0	0	0	0	0	0	0	0	0	0	0	0	0	0	0	0	0	0	0	0	0	0	0	0	0	0	0	0	0	0	0	0	0	0	0	0
ENTPD1	0	0	0	0	0	0	0	0	0	0	0	0	0	0	0	0	0	0	0	0	0	0	0	0	0	0	0	0	0	0	0	0	0	0	0	0	0	0	0	0	0	0	0	0	0	0	0	0	0
ENTPD2	0	0	0	0	0	0	0	0	0	0	0	0	0	0	0	0	0	0	0	0	0	0	0	0	0	0	0	0	0	0	0	0	0	0	0	0	0	0	0	0	0	0	0	0	0	0	0	0	0
EPB41L4B	0	0	0	0	0	0	0	0	0	0	0	0	0	0	0	0	0	0	0	0	0	0	0	0	0	0	0	0	0	0	0	0	0	0	0	0	0	0	0	0	0	0	0	0	0	0	0	0	0
EPHB2	0	0	0	0	0	0	0	0	0	0	0	0	0	0	0	0	0	0	0	0	0	0	0	0	0	0	0	0	0	0	0	0	0	0	0	0	0	0	0	0	0	0	0	0	0	0	0	0	0
EPPK1	0	0	0	0	0	0	0	0	0	0	0	0	0	0	0	0	0	0	0	0	0	0	0	0	0	0	0	0	0	0	0	0	0	0	0	0	0	0	0	0	0	0	0	0	0	0	0	0	0
ERBB2	2	0.0229885	14	0.0340633	103	0.0950185	9	0.030303	1	0.0277778	14	0.023569	11	0.0604396	8	0.0136752	11	0.0210325	0	0	12	0.0234375	21	0.040856	3	0.00806452	17	0.0300353	18	0.036961	3	0.0344828	13	0.0222222	5	0.0271739	19	0.0384615	5	0.0196078	7	0.0158371	26	0.0590909	5	0.033557	13	0.0260521	5
EVL	0	0	0	0	0	0	0	0	0	0	0	0	0	0	0	0	0	0	0	0	0	0	0	0	0	0	0	0	0	0	0	0	0	0	0	0	0	0	0	0	0	0	0	0	0	0	0	0	0
EVPL	0	0	0	0	0	0	0	0	0	0	0	0	0	0	0	0	0	0	0	0	0	0	0	0	0	0	0	0	0	0	0	0	0	0	0	0	0	0	0	0	0	0	0	0	0	0	0	0	0
EXT1	0	0	0	0	0	0	0	0	0	0	0	0	0	0	0	0	0	0	0	0	0	0	0	0	0	0	0	0	0	0	0	0	0	0	0	0	0	0	0	0	0	0	0	0	0	0	0	0	0
F10	0	0	0	0	0	0	0	0	0	0	0	0	0	0	0	0	0	0	0	0	0	0	0	0	0	0	0	0	0	0	0	0	0	0	0	0	0	0	0	0	0	0	0	0	0	0	0	0	0
F11	0	0	0	0	0	0	0	0	0	0	0	0	0	0	0	0	0	0	0	0	0	0	0	0	0	0	0	0	0	0	0	0	0	0	0	0	0	0	0	0	0	0	0	0	0	0	0	0	0
F11R	0	0	0	0	0	0	0	0	0	0	0	0	0	0	0	0	0	0	0	0	0	0	0	0	0	0	0	0	0	0	0	0	0	0	0	0	0	0	0	0	0	0	0	0	0	0	0	0	0
F12	0	0	0	0	0	0	0	0	0	0	0	0	0	0	0	0	0	0	0	0	0	0	0	0	0	0	0	0	0	0	0	0	0	0	0	0	0	0	0	0	0	0	0	0	0	0	0	0	0
F13A1	0	0	0	0	0	0	0	0	0	0	0	0	0	0	0	0	0	0	0	0	0	0	0	0	0	0	0	0	0	0	0	0	0	0	0	0	0	0	0	0	0	0	0	0	0	0	0	0	0
F13B	0	0	0	0	0	0	0	0	0	0	0	0	0	0	0	0	0	0	0	0	0	0	0	0	0	0	0	0	0	0	0	0	0	0	0	0	0	0	0	0	0	0	0	0	0	0	0	0	0
F2	0	0	0	0	0	0	0	0	0	0	0	0	0	0	0	0	0	0	0	0	0	0	0	0	0	0	0	0	0	0	0	0	0	0	0	0	0	0	0	0	0	0	0	0	0	0	0	0	0
F2R	0	0	0	0	0	0	0	0	0	0	0	0	0	0	0	0	0	0	0	0	0	0	0	0	0	0	0	0	0	0	0	0	0	0	0	0	0	0	0	0	0	0	0	0	0	0	0	0	0
F2RL1	0	0	0	0	0	0	0	0	0	0	0	0	0	0	0	0	0	0	0	0	0	0	0	0	0	0	0	0	0	0	0	0	0	0	0	0	0	0	0	0	0	0	0	0	0	0	0	0	0
F2RL2	0	0	0	0	0	0	0	0	0	0	0	0	0	0	0	0	0	0	0	0	0	0	0	0	0	0	0	0	0	0	0	0	0	0	0	0	0	0	0	0	0	0	0	0	0	0	0	0	0
F2RL3	0	0	0	0	0	0	0	0	0	0	0	0	0	0	0	0	0	0	0	0	0	0	0	0	0	0	0	0	0	0	0	0	0	0	0	0	0	0	0	0	0	0	0	0	0	0	0	0	0
F3	0	0	0	0	0	0	0	0	0	0	0	0	0	0	0	0	0	0	0	0	0	0	0	0	0	0	0	0	0	0	0	0	0	0	0	0	0	0	0	0	0	0	0	0	0	0	0	0	0
F5	0	0	0	0	0	0	0	0	0	0	0	0	0	0	0	0	0	0	0	0	0	0	0	0	0	0	0	0	0	0	0	0	0	0	0	0	0	0	0	0	0	0	0	0	0	0	0	0	0
F7	0	0	0	0	0	0	0	0	0	0	0	0	0	0	0	0	0	0	0	0	0	0	0	0	0	0	0	0	0	0	0	0	0	0	0	0	0	0	0	0	0	0	0	0	0	0	0	0	0
F8	0	0	0	0	0	0	0	0	0	0	0	0	0	0	0	0	0	0	0	0	0	0	0	0	0	0	0	0	0	0	0	0	0	0	0	0	0	0	0	0	0	0	0	0	0	0	0	0	0
F9	0	0	0	0	0	0	0	0	0	0	0	0	0	0	0	0	0	0	0	0	0	0	0	0	0	0	0	0	0	0	0	0	0	0	0	0	0	0	0	0	0	0	0	0	0	0	0	0	0
FBLN1	0	0	0	0	0	0	0	0	0	0	0	0	0	0	0	0	0	0	0	0	0	0	0	0	0	0	0	0	0	0	0	0	0	0	0	0	0	0	0	0	0	0	0	0	0	0	0	0	0
FCER1G	0	0	0	0	0	0	0	0	0	0	0	0	0	0	0	0	0	0	0	0	0	0	0	0	0	0	0	0	0	0	0	0	0	0	0	0	0	0	0	0	0	0	0	0	0	0	0	0	0
FER1L5	0	0	0	0	0	0	0	0	0	0	0	0	0	0	0	0	0	0	0	0	0	0	0	0	0	0	0	0	0	0	0	0	0	0	0	0	0	0	0	0	0	0	0	0	0	0	0	0	0
FERMT1	0	0	0	0	0	0	0	0	0	0	0	0	0	0	0	0	0	0	0	0	0	0	0	0	0	0	0	0	0	0	0	0	0	0	0	0	0	0	0	0	0	0	0	0	0	0	0	0	0
FERMT2	0	0	0	0	0	0	0	0	0	0	0	0	0	0	0	0	0	0	0	0	0	0	0	0	0	0	0	0	0	0	0	0	0	0	0	0	0	0	0	0	0	0	0	0	0	0	0	0	0
FERMT3	0	0	0	0	0	0	0	0	0	0	0	0	0	0	0	0	0	0	0	0	0	0	0	0	0	0	0	0	0	0	0	0	0	0	0	0	0	0	0	0	0	0	0	0	0	0	0	0	0
FGA	0	0	0	0	0	0	0	0	0	0	0	0	0	0	0	0	0	0	0	0	0	0	0	0	0	0	0	0	0	0	0	0	0	0	0	0	0	0	0	0	0	0	0	0	0	0	0	0	0
FGB	0	0	0	0	0	0	0	0	0	0	0	0	0	0	0	0	0	0	0	0	0	0	0	0	0	0	0	0	0	0	0	0	0	0	0	0	0	0	0	0	0	0	0	0	0	0	0	0	0
FGF1	0	0	0	0	0	0	0	0	0	0	0	0	0	0	0	0	0	0	0	0	0	0	0	0	0	0	0	0	0	0	0	0	0	0	0	0	0	0	0	0	0	0	0	0	0	0	0	0	0
FGF10	0	0	0	0	0	0	0	0	0	0	0	0	0	0	0	0	0	0	0	0	0	0	0	0	0	0	0	0	0	0	0	0	0	0	0	0	0	0	0	0	0	0	0	0	0	0	0	0	0
FGF2	0	0	0	0	0	0	0	0	0	0	0	0	0	0	0	0	0	0	0	0	0	0	0	0	0	0	0	0	0	0	0	0	0	0	0	0	0	0	0	0	0	0	0	0	0	0	0	0	0
FGF7	0	0	0	0	0	0	0	0	0	0	0	0	0	0	0	0	0	0	0	0	0	0	0	0	0	0	0	0	0	0	0	0	0	0	0	0	0	0	0	0	0	0	0	0	0	0	0	0	0
FGFR1OP2	0	0	0	0	0	0	0	0	0	0	0	0	0	0	0	0	0	0	0	0	0	0	0	0	0	0	0	0	0	0	0	0	0	0	0	0	0	0	0	0	0	0	0	0	0	0	0	0	0
FGG	0	0	0	0	0	0	0	0	0	0	0	0	0	0	0	0	0	0	0	0	0	0	0	0	0	0	0	0	0	0	0	0	0	0	0	0	0	0	0	0	0	0	0	0	0	0	0	0	0
FKBP10	0	0	0	0	0	0	0	0	0	0	0	0	0	0	0	0	0	0	0	0	0	0	0	0	0	0	0	0	0	0	0	0	0	0	0	0	0	0	0	0	0	0	0	0	0	0	0	0	0
FLNA	0	0	0	0	0	0	0	0	0	0	0	0	0	0	0	0	0	0	0	0	0	0	0	0	0	0	0	0	0	0	0	0	0	0	0	0	0	0	0	0	0	0	0	0	0	0	0	0	0
FN1	2	0.0229885	5	0.0121655	26	0.0239852	6	0.020202	3	0.0833333	15	0.0252525	5	0.0274725	8	0.0136752	2	0.00382409	4	0.0615385	22	0.0429688	13	0.0252918	7	0.0188172	12	0.0212014	11	0.0225873	0	0	7	0.0119658	2	0.0108696	9	0.0182186	7	0.027451	11	0.0248869	11	0.025	3	0.0201342	12	0.0240481	3
FNTB	0	0	0	0	0	0	0	0	0	0	0	0	0	0	0	0	0	0	0	0	0	0	0	0	0	0	0	0	0	0	0	0	0	0	0	0	0	0	0	0	0	0	0	0	0	0	0	0	0
FOXA2	0	0	0	0	0	0	0	0	0	0	0	0	0	0	0	0	0	0	0	0	0	0	0	0	0	0	0	0	0	0	0	0	0	0	0	0	0	0	0	0	0	0	0	0	0	0	0	0	0
FOXC2	0	0	0	0	0	0	0	0	0	0	0	0	0	0	0	0	0	0	0	0	0	0	0	0	0	0	0	0	0	0	0	0	0	0	0	0	0	0	0	0	0	0	0	0	0	0	0	0	0
FZD6	0	0	0	0	0	0	0	0	0	0	0	0	0	0	0	0	0	0	0	0	0	0	0	0	0	0	0	0	0	0	0	0	0	0	0	0	0	0	0	0	0	0	0	0	0	0	0	0	0
FZD7	0	0	0	0	0	0	0	0	0	0	0	0	0	0	0	0	0	0	0	0	0	0	0	0	0	0	0	0	0	0	0	0	0	0	0	0	0	0	0	0	0	0	0	0	0	0	0	0	0
GAS6	0	0	0	0	0	0	0	0	0	0	0	0	0	0	0	0	0	0	0	0	0	0	0	0	0	0	0	0	0	0	0	0	0	0	0	0	0	0	0	0	0	0	0	0	0	0	0	0	0
GATA1	0	0	0	0	0	0	0	0	0	0	0	0	0	0	0	0	0	0	0	0	0	0	0	0	0	0	0	0	0	0	0	0	0	0	0	0	0	0	0	0	0	0	0	0	0	0	0	0	0
GATA2	0	0	0	0	0	0	0	0	0	0	0	0	0	0	0	0	0	0	0	0	0	0	0	0	0	0	0	0	0	0	0	0	0	0	0	0	0	0	0	0	0	0	0	0	0	0	0	0	0
GATA4	0	0	0	0	0	0	0	0	0	0	0	0	0	0	0	0	0	0	0	0	0	0	0	0	0	0	0	0	0	0	0	0	0	0	0	0	0	0	0	0	0	0	0	0	0	0	0	0	0
GJA1	0	0	0	0	0	0	0	0	0	0	0	0	0	0	0	0	0	0	0	0	0	0	0	0	0	0	0	0	0	0	0	0	0	0	0	0	0	0	0	0	0	0	0	0	0	0	0	0	0
GNA13	0	0	0	0	0	0	0	0	0	0	0	0	0	0	0	0	0	0	0	0	0	0	0	0	0	0	0	0	0	0	0	0	0	0	0	0	0	0	0	0	0	0	0	0	0	0	0	0	0
GNAS	0	0	0	0	0	0	0	0	0	0	0	0	0	0	0	0	0	0	0	0	0	0	0	0	0	0	0	0	0	0	0	0	0	0	0	0	0	0	0	0	0	0	0	0	0	0	0	0	0
GP1BA	0	0	0	0	0	0	0	0	0	0	0	0	0	0	0	0	0	0	0	0	0	0	0	0	0	0	0	0	0	0	0	0	0	0	0	0	0	0	0	0	0	0	0	0	0	0	0	0	0
GP1BB	0	0	0	0	0	0	0	0	0	0	0	0	0	0	0	0	0	0	0	0	0	0	0	0	0	0	0	0	0	0	0	0	0	0	0	0	0	0	0	0	0	0	0	0	0	0	0	0	0
GP5	0	0	0	0	0	0	0	0	0	0	0	0	0	0	0	0	0	0	0	0	0	0	0	0	0	0	0	0	0	0	0	0	0	0	0	0	0	0	0	0	0	0	0	0	0	0	0	0	0
GP6	0	0	0	0	0	0	0	0	0	0	0	0	0	0	0	0	0	0	0	0	0	0	0	0	0	0	0	0	0	0	0	0	0	0	0	0	0	0	0	0	0	0	0	0	0	0	0	0	0
GP9	0	0	0	0	0	0	0	0	0	0	0	0	0	0	0	0	0	0	0	0	0	0	0	0	0	0	0	0	0	0	0	0	0	0	0	0	0	0	0	0	0	0	0	0	0	0	0	0	0
GPR4	0	0	0	0	0	0	0	0	0	0	0	0	0	0	0	0	0	0	0	0	0	0	0	0	0	0	0	0	0	0	0	0	0	0	0	0	0	0	0	0	0	0	0	0	0	0	0	0	0
GPX1	0	0	0	0	0	0	0	0	0	0	0	0	0	0	0	0	0	0	0	0	0	0	0	0	0	0	0	0	0	0	0	0	0	0	0	0	0	0	0	0	0	0	0	0	0	0	0	0	0
GRHL3	0	0	0	0	0	0	0	0	0	0	0	0	0	0	0	0	0	0	0	0	0	0	0	0	0	0	0	0	0	0	0	0	0	0	0	0	0	0	0	0	0	0	0	0	0	0	0	0	0
HBEGF	0	0	0	0	0	0	0	0	0	0	0	0	0	0	0	0	0	0	0	0	0	0	0	0	0	0	0	0	0	0	0	0	0	0	0	0	0	0	0	0	0	0	0	0	0	0	0	0	0
HGFAC	0	0	0	0	0	0	0	0	0	0	0	0	0	0	0	0	0	0	0	0	0	0	0	0	0	0	0	0	0	0	0	0	0	0	0	0	0	0	0	0	0	0	0	0	0	0	0	0	0
HIF1A	0	0	0	0	0	0	0	0	0	0	0	0	0	0	0	0	0	0	0	0	0	0	0	0	0	0	0	0	0	0	0	0	0	0	0	0	0	0	0	0	0	0	0	0	0	0	0	0	0
HMGB1	0	0	0	0	0	0	0	0	0	0	0	0	0	0	0	0	0	0	0	0	0	0	0	0	0	0	0	0	0	0	0	0	0	0	0	0	0	0	0	0	0	0	0	0	0	0	0	0	0
HMGCR	0	0	0	0	0	0	0	0	0	0	0	0	0	0	0	0	0	0	0	0	0	0	0	0	0	0	0	0	0	0	0	0	0	0	0	0	0	0	0	0	0	0	0	0	0	0	0	0	0
HMOX1	0	0	0	0	0	0	0	0	0	0	0	0	0	0	0	0	0	0	0	0	0	0	0	0	0	0	0	0	0	0	0	0	0	0	0	0	0	0	0	0	0	0	0	0	0	0	0	0	0
HNF4A	0	0	0	0	0	0	0	0	0	0	0	0	0	0	0	0	0	0	0	0	0	0	0	0	0	0	0	0	0	0	0	0	0	0	0	0	0	0	0	0	0	0	0	0	0	0	0	0	0
HPS1	0	0	0	0	0	0	0	0	0	0	0	0	0	0	0	0	0	0	0	0	0	0	0	0	0	0	0	0	0	0	0	0	0	0	0	0	0	0	0	0	0	0	0	0	0	0	0	0	0
HPS4	0	0	0	0	0	0	0	0	0	0	0	0	0	0	0	0	0	0	0	0	0	0	0	0	0	0	0	0	0	0	0	0	0	0	0	0	0	0	0	0	0	0	0	0	0	0	0	0	0
HPS5	0	0	0	0	0	0	0	0	0	0	0	0	0	0	0	0	0	0	0	0	0	0	0	0	0	0	0	0	0	0	0	0	0	0	0	0	0	0	0	0	0	0	0	0	0	0	0	0	0
HPS6	0	0	0	0	0	0	0	0	0	0	0	0	0	0	0	0	0	0	0	0	0	0	0	0	0	0	0	0	0	0	0	0	0	0	0	0	0	0	0	0	0	0	0	0	0	0	0	0	0
HPSE	0	0	0	0	0	0	0	0	0	0	0	0	0	0	0	0	0	0	0	0	0	0	0	0	0	0	0	0	0	0	0	0	0	0	0	0	0	0	0	0	0	0	0	0	0	0	0	0	0
HRAS	0	0	0	0	0	0	0	0	0	0	0	0	0	0	0	0	0	0	0	0	0	0	0	0	0	0	0	0	0	0	0	0	0	0	0	0	0	0	0	0	0	0	0	0	0	0	0	0	0
HRG	0	0	0	0	0	0	0	0	0	0	0	0	0	0	0	0	0	0	0	0	0	0	0	0	0	0	0	0	0	0	0	0	0	0	0	0	0	0	0	0	0	0	0	0	0	0	0	0	0
IGF1	0	0	0	0	0	0	0	0	0	0	0	0	0	0	0	0	0	0	0	0	0	0	0	0	0	0	0	0	0	0	0	0	0	0	0	0	0	0	0	0	0	0	0	0	0	0	0	0	0
IL1A	0	0	0	0	0	0	0	0	0	0	0	0	0	0	0	0	0	0	0	0	0	0	0	0	0	0	0	0	0	0	0	0	0	0	0	0	0	0	0	0	0	0	0	0	0	0	0	0	0
INSL3	0	0	0	0	0	0	0	0	0	0	0	0	0	0	0	0	0	0	0	0	0	0	0	0	0	0	0	0	0	0	0	0	0	0	0	0	0	0	0	0	0	0	0	0	0	0	0	0	0
ITGA2B	0	0	0	0	0	0	0	0	0	0	0	0	0	0	0	0	0	0	0	0	0	0	0	0	0	0	0	0	0	0	0	0	0	0	0	0	0	0	0	0	0	0	0	0	0	0	0	0	0
ITGB1	0	0	0	0	0	0	0	0	0	0	0	0	0	0	0	0	0	0	0	0	0	0	0	0	0	0	0	0	0	0	0	0	0	0	0	0	0	0	0	0	0	0	0	0	0	0	0	0	0
ITGB3	0	0	0	0	0	0	0	0	0	0	0	0	0	0	0	0	0	0	0	0	0	0	0	0	0	0	0	0	0	0	0	0	0	0	0	0	0	0	0	0	0	0	0	0	0	0	0	0	0
JAML	0	0	0	0	0	0	0	0	0	0	0	0	0	0	0	0	0	0	0	0	0	0	0	0	0	0	0	0	0	0	0	0	0	0	0	0	0	0	0	0	0	0	0	0	0	0	0	0	0
KANK1	0	0	0	0	0	0	0	0	0	0	0	0	0	0	0	0	0	0	0	0	0	0	0	0	0	0	0	0	0	0	0	0	0	0	0	0	0	0	0	0	0	0	0	0	0	0	0	0	0
KDR	0	0	6	0.0145985	25	0.0230627	4	0.013468	1	0.0277778	21	0.0353535	4	0.021978	4	0.00683761	3	0.00573614	0	0	18	0.0351562	8	0.0155642	7	0.0188172	7	0.0123675	7	0.0143737	0	0	7	0.0119658	2	0.0108696	8	0.0161943	4	0.0156863	13	0.0294118	8	0.0181818	5	0.033557	10	0.0200401	2
KLKB1	0	0	0	0	0	0	0	0	0	0	0	0	0	0	0	0	0	0	0	0	0	0	0	0	0	0	0	0	0	0	0	0	0	0	0	0	0	0	0	0	0	0	0	0	0	0	0	0	0
KNG1	0	0	0	0	0	0	0	0	0	0	0	0	0	0	0	0	0	0	0	0	0	0	0	0	0	0	0	0	0	0	0	0	0	0	0	0	0	0	0	0	0	0	0	0	0	0	0	0	0
KRT6A	0	0	0	0	0	0	0	0	0	0	0	0	0	0	0	0	0	0	0	0	0	0	0	0	0	0	0	0	0	0	0	0	0	0	0	0	0	0	0	0	0	0	0	0	0	0	0	0	0
LNPK	0	0	0	0	0	0	0	0	0	0	0	0	0	0	0	0	0	0	0	0	0	0	0	0	0	0	0	0	0	0	0	0	0	0	0	0	0	0	0	0	0	0	0	0	0	0	0	0	0
LOX	0	0	0	0	0	0	0	0	0	0	0	0	0	0	0	0	0	0	0	0	0	0	0	0	0	0	0	0	0	0	0	0	0	0	0	0	0	0	0	0	0	0	0	0	0	0	0	0	0
LYN	0	0	0	0	0	0	0	0	0	0	0	0	0	0	0	0	0	0	0	0	0	0	0	0	0	0	0	0	0	0	0	0	0	0	0	0	0	0	0	0	0	0	0	0	0	0	0	0	0
LYST	0	0	0	0	0	0	0	0	0	0	0	0	0	0	0	0	0	0	0	0	0	0	0	0	0	0	0	0	0	0	0	0	0	0	0	0	0	0	0	0	0	0	0	0	0	0	0	0	0
MACF1	0	0	0	0	0	0	0	0	0	0	0	0	0	0	0	0	0	0	0	0	0	0	0	0	0	0	0	0	0	0	0	0	0	0	0	0	0	0	0	0	0	0	0	0	0	0	0	0	0
MAP3K1	0	0	0	0	0	0	0	0	0	0	0	0	0	0	0	0	0	0	0	0	0	0	0	0	0	0	0	0	0	0	0	0	0	0	0	0	0	0	0	0	0	0	0	0	0	0	0	0	0
MERTK	0	0	0	0	0	0	0	0	0	0	0	0	0	0	0	0	0	0	0	0	0	0	0	0	0	0	0	0	0	0	0	0	0	0	0	0	0	0	0	0	0	0	0	0	0	0	0	0	0
MIA3	0	0	0	0	0	0	0	0	0	0	0	0	0	0	0	0	0	0	0	0	0	0	0	0	0	0	0	0	0	0	0	0	0	0	0	0	0	0	0	0	0	0	0	0	0	0	0	0	0
MMP12	0	0	0	0	0	0	0	0	0	0	0	0	0	0	0	0	0	0	0	0	0	0	0	0	0	0	0	0	0	0	0	0	0	0	0	0	0	0	0	0	0	0	0	0	0	0	0	0	0
MMRN1	0	0	0	0	0	0	0	0	0	0	0	0	0	0	0	0	0	0	0	0	0	0	0	0	0	0	0	0	0	0	0	0	0	0	0	0	0	0	0	0	0	0	0	0	0	0	0	0	0
MPIG6B	0	0	0	0	0	0	0	0	0	0	0	0	0	0	0	0	0	0	0	0	0	0	0	0	0	0	0	0	0	0	0	0	0	0	0	0	0	0	0	0	0	0	0	0	0	0	0	0	0
MRTFA	0	0	0	0	0	0	0	0	0	0	0	0	0	0	0	0	0	0	0	0	0	0	0	0	0	0	0	0	0	0	0	0	0	0	0	0	0	0	0	0	0	0	0	0	0	0	0	0	0
MSX2	0	0	0	0	0	0	0	0	0	0	0	0	0	0	0	0	0	0	0	0	0	0	0	0	0	0	0	0	0	0	0	0	0	0	0	0	0	0	0	0	0	0	0	0	0	0	0	0	0
MTOR	0	0	3	0.00729927	6	0.00553506	1	0.003367	0	0	3	0.00505051	0	0	0	0	3	0.00573614	0	0	9	0.0175781	0	0	10	0.0268817	9	0.0159011	1	0.00205339	0	0	2	0.0034188	3	0.0163043	1	0.00202429	2	0.00784314	2	0.00452489	2	0.00454545	1	0.00671141	6	0.012024	1
MUC16	0	0	0	0	0	0	0	0	0	0	0	0	0	0	0	0	0	0	0	0	0	0	0	0	0	0	0	0	0	0	0	0	0	0	0	0	0	0	0	0	0	0	0	0	0	0	0	0	0
MUSTN1	0	0	0	0	0	0	0	0	0	0	0	0	0	0	0	0	0	0	0	0	0	0	0	0	0	0	0	0	0	0	0	0	0	0	0	0	0	0	0	0	0	0	0	0	0	0	0	0	0
MYH10	0	0	0	0	0	0	0	0	0	0	0	0	0	0	0	0	0	0	0	0	0	0	0	0	0	0	0	0	0	0	0	0	0	0	0	0	0	0	0	0	0	0	0	0	0	0	0	0	0
MYH2	0	0	0	0	0	0	0	0	0	0	0	0	0	0	0	0	0	0	0	0	0	0	0	0	0	0	0	0	0	0	0	0	0	0	0	0	0	0	0	0	0	0	0	0	0	0	0	0	0
MYH9	0	0	0	0	0	0	0	0	0	0	0	0	0	0	0	0	0	0	0	0	0	0	0	0	0	0	0	0	0	0	0	0	0	0	0	0	0	0	0	0	0	0	0	0	0	0	0	0	0
MYLK	0	0	0	0	0	0	0	0	0	0	0	0	0	0	0	0	0	0	0	0	0	0	0	0	0	0	0	0	0	0	0	0	0	0	0	0	0	0	0	0	0	0	0	0	0	0	0	0	0
MYOF	0	0	0	0	0	0	0	0	0	0	0	0	0	0	0	0	0	0	0	0	0	0	0	0	0	0	0	0	0	0	0	0	0	0	0	0	0	0	0	0	0	0	0	0	0	0	0	0	0
MYOZ1	0	0	0	0	0	0	0	0	0	0	0	0	0	0	0	0	0	0	0	0	0	0	0	0	0	0	0	0	0	0	0	0	0	0	0	0	0	0	0	0	0	0	0	0	0	0	0	0	0
NACA	0	0	0	0	0	0	0	0	0	0	0	0	0	0	0	0	0	0	0	0	0	0	0	0	0	0	0	0	0	0	0	0	0	0	0	0	0	0	0	0	0	0	0	0	0	0	0	0	0
NBEAL2	0	0	0	0	0	0	0	0	0	0	0	0	0	0	0	0	0	0	0	0	0	0	0	0	0	0	0	0	0	0	0	0	0	0	0	0	0	0	0	0	0	0	0	0	0	0	0	0	0
NDNF	0	0	0	0	0	0	0	0	0	0	0	0	0	0	0	0	0	0	0	0	0	0	0	0	0	0	0	0	0	0	0	0	0	0	0	0	0	0	0	0	0	0	0	0	0	0	0	0	0
NF1	0	0	0	0	0	0	0	0	0	0	0	0	0	0	0	0	0	0	0	0	0	0	0	0	0	0	0	0	0	0	0	0	0	0	0	0	0	0	0	0	0	0	0	0	0	0	0	0	0
NFE2L2	0	0	0	0	0	0	0	0	0	0	0	0	0	0	0	0	0	0	0	0	0	0	0	0	0	0	0	0	0	0	0	0	0	0	0	0	0	0	0	0	0	0	0	0	0	0	0	0	0
NLRP6	0	0	0	0	0	0	0	0	0	0	0	0	0	0	0	0	0	0	0	0	0	0	0	0	0	0	0	0	0	0	0	0	0	0	0	0	0	0	0	0	0	0	0	0	0	0	0	0	0
NOG	0	0	0	0	0	0	0	0	0	0	0	0	0	0	0	0	0	0	0	0	0	0	0	0	0	0	0	0	0	0	0	0	0	0	0	0	0	0	0	0	0	0	0	0	0	0	0	0	0
NOTCH2	0	0	0	0	0	0	0	0	0	0	0	0	0	0	0	0	0	0	0	0	0	0	0	0	0	0	0	0	0	0	0	0	0	0	0	0	0	0	0	0	0	0	0	0	0	0	0	0	0
NR4A3	0	0	0	0	0	0	0	0	0	0	0	0	0	0	0	0	0	0	0	0	0	0	0	0	0	0	0	0	0	0	0	0	0	0	0	0	0	0	0	0	0	0	0	0	0	0	0	0	0
P2RX1	0	0	0	0	0	0	0	0	0	0	0	0	0	0	0	0	0	0	0	0	0	0	0	0	0	0	0	0	0	0	0	0	0	0	0	0	0	0	0	0	0	0	0	0	0	0	0	0	0
P2RY1	0	0	0	0	0	0	0	0	0	0	0	0	0	0	0	0	0	0	0	0	0	0	0	0	0	0	0	0	0	0	0	0	0	0	0	0	0	0	0	0	0	0	0	0	0	0	0	0	0
P2RY12	0	0	0	0	0	0	0	0	0	0	0	0	0	0	0	0	0	0	0	0	0	0	0	0	0	0	0	0	0	0	0	0	0	0	0	0	0	0	0	0	0	0	0	0	0	0	0	0	0
PAK1	0	0	0	0	0	0	0	0	0	0	0	0	0	0	0	0	0	0	0	0	0	0	0	0	0	0	0	0	0	0	0	0	0	0	0	0	0	0	0	0	0	0	0	0	0	0	0	0	0
PAPSS2	0	0	0	0	0	0	0	0	0	0	0	0	0	0	0	0	0	0	0	0	0	0	0	0	0	0	0	0	0	0	0	0	0	0	0	0	0	0	0	0	0	0	0	0	0	0	0	0	0
PARD3	0	0	0	0	0	0	0	0	0	0	0	0	0	0	0	0	0	0	0	0	0	0	0	0	0	0	0	0	0	0	0	0	0	0	0	0	0	0	0	0	0	0	0	0	0	0	0	0	0
PDCD10	0	0	0	0	0	0	0	0	0	0	0	0	0	0	0	0	0	0	0	0	0	0	0	0	0	0	0	0	0	0	0	0	0	0	0	0	0	0	0	0	0	0	0	0	0	0	0	0	0
PDGFA	0	0	0	0	0	0	0	0	0	0	0	0	0	0	0	0	0	0	0	0	0	0	0	0	0	0	0	0	0	0	0	0	0	0	0	0	0	0	0	0	0	0	0	0	0	0	0	0	0
PDGFB	0	0	0	0	0	0	0	0	0	0	0	0	0	0	0	0	0	0	0	0	0	0	0	0	0	0	0	0	0	0	0	0	0	0	0	0	0	0	0	0	0	0	0	0	0	0	0	0	0
PDGFRA	0	0	0	0	0	0	0	0	0	0	0	0	0	0	0	0	0	0	0	0	0	0	0	0	0	0	0	0	0	0	0	0	0	0	0	0	0	0	0	0	0	0	0	0	0	0	0	0	0
PDPN	0	0	0	0	0	0	0	0	0	0	0	0	0	0	0	0	0	0	0	0	0	0	0	0	0	0	0	0	0	0	0	0	0	0	0	0	0	0	0	0	0	0	0	0	0	0	0	0	0
PEAR1	0	0	13	0.0316302	9	0.00830258	5	0.016835	1	0.0277778	14	0.023569	7	0.0384615	8	0.0136752	7	0.0133843	0	0	14	0.0273438	11	0.0214008	1	0.00268817	10	0.0176678	8	0.0164271	2	0.0229885	1	0.0017094	4	0.0217391	13	0.0263158	4	0.0156863	11	0.0248869	15	0.0340909	6	0.0402685	5	0.01002	2
PECAM1	2	0.0229885	0	0	0	0	0	0	0	0	0	0	0	0	0	0	0	0	0	0	0	0	0	0	0	0	0	0	0	0	0	0	0	0	0	0	0	0	0	0	0	0	0	0	0	0	0	0	0
PF4	0	0	0	0	0	0	0	0	0	0	0	0	0	0	0	0	0	0	0	0	0	0	0	0	0	0	0	0	0	0	0	0	0	0	0	0	0	0	0	0	0	0	0	0	0	0	0	0	0
PHLDB2	0	0	0	0	0	0	0	0	0	0	0	0	0	0	0	0	0	0	0	0	0	0	0	0	0	0	0	0	0	0	0	0	0	0	0	0	0	0	0	0	0	0	0	0	0	0	0	0	0
PIK3CB	0	0	0	0	0	0	0	0	0	0	0	0	0	0	0	0	0	0	0	0	0	0	0	0	0	0	0	0	0	0	0	0	0	0	0	0	0	0	0	0	0	0	0	0	0	0	0	0	0
PIP5K1C	0	0	0	0	0	0	0	0	0	0	0	0	0	0	0	0	0	0	0	0	0	0	0	0	0	0	0	0	0	0	0	0	0	0	0	0	0	0	0	0	0	0	0	0	0	0	0	0	0
PLA2G4A	0	0	0	0	0	0	0	0	0	0	0	0	0	0	0	0	0	0	0	0	0	0	0	0	0	0	0	0	0	0	0	0	0	0	0	0	0	0	0	0	0	0	0	0	0	0	0	0	0
PLAU	0	0	0	0	0	0	0	0	0	0	0	0	0	0	0	0	0	0	0	0	0	0	0	0	0	0	0	0	0	0	0	0	0	0	0	0	0	0	0	0	0	0	0	0	0	0	0	0	0
PLEC	0	0	0	0	0	0	0	0	0	0	0	0	0	0	0	0	0	0	0	0	0	0	0	0	0	0	0	0	0	0	0	0	0	0	0	0	0	0	0	0	0	0	0	0	0	0	0	0	0
PLEK	0	0	0	0	0	0	0	0	0	0	0	0	0	0	0	0	0	0	0	0	0	0	0	0	0	0	0	0	0	0	0	0	0	0	0	0	0	0	0	0	0	0	0	0	0	0	0	0	0
PLET1	0	0	0	0	0	0	0	0	0	0	0	0	0	0	0	0	0	0	0	0	0	0	0	0	0	0	0	0	0	0	0	0	0	0	0	0	0	0	0	0	0	0	0	0	0	0	0	0	0
PLG	0	0	0	0	0	0	0	0	0	0	0	0	0	0	0	0	0	0	0	0	0	0	0	0	0	0	0	0	0	0	0	0	0	0	0	0	0	0	0	0	0	0	0	0	0	0	0	0	0
PLPP3	0	0	0	0	0	0	0	0	0	0	0	0	0	0	0	0	0	0	0	0	0	0	0	0	0	0	0	0	0	0	0	0	0	0	0	0	0	0	0	0	0	0	0	0	0	0	0	0	0
POU2F3	0	0	0	0	0	0	0	0	0	0	0	0	0	0	0	0	0	0	0	0	0	0	0	0	0	0	0	0	0	0	0	0	0	0	0	0	0	0	0	0	0	0	0	0	0	0	0	0	0
PPARA	0	0	0	0	0	0	0	0	0	0	0	0	0	0	0	0	0	0	0	0	0	0	0	0	0	0	0	0	0	0	0	0	0	0	0	0	0	0	0	0	0	0	0	0	0	0	0	0	0
PPARD	0	0	0	0	0	0	0	0	0	0	0	0	0	0	0	0	0	0	0	0	0	0	0	0	0	0	0	0	0	0	0	0	0	0	0	0	0	0	0	0	0	0	0	0	0	0	0	0	0
PPIA	0	0	0	0	0	0	0	0	0	0	0	0	0	0	0	0	0	0	0	0	0	0	0	0	0	0	0	0	0	0	0	0	0	0	0	0	0	0	0	0	0	0	0	0	0	0	0	0	0
PPL	0	0	0	0	0	0	0	0	0	0	0	0	0	0	0	0	0	0	0	0	0	0	0	0	0	0	0	0	0	0	0	0	0	0	0	0	0	0	0	0	0	0	0	0	0	0	0	0	0
PRCP	0	0	0	0	0	0	0	0	0	0	0	0	0	0	0	0	0	0	0	0	0	0	0	0	0	0	0	0	0	0	0	0	0	0	0	0	0	0	0	0	0	0	0	0	0	0	0	0	0
PRDX2	0	0	7	0.0170316	25	0.0230627	5	0.016835	2	0.0555556	11	0.0185185	2	0.010989	2	0.0034188	7	0.0133843	0	0	18	0.0351562	12	0.0233463	7	0.0188172	13	0.0229682	2	0.00410678	4	0.045977	7	0.0119658	1	0.00543478	5	0.0101215	9	0.0352941	12	0.0271493	8	0.0181818	6	0.0402685	14	0.0280561	2
PRKCA	0	0	0	0	0	0	0	0	0	0	0	0	0	0	0	0	0	0	0	0	0	0	0	0	0	0	0	0	0	0	0	0	0	0	0	0	0	0	0	0	0	0	0	0	0	0	0	0	0
PRKCD	0	0	0	0	0	0	0	0	0	0	0	0	0	0	0	0	0	0	0	0	0	0	0	0	0	0	0	0	0	0	0	0	0	0	0	0	0	0	0	0	0	0	0	0	0	0	0	0	0
PRKCE	0	0	0	0	0	0	0	0	0	0	0	0	0	0	0	0	0	0	0	0	0	0	0	0	0	0	0	0	0	0	0	0	0	0	0	0	0	0	0	0	0	0	0	0	0	0	0	0	0
PRKCQ	0	0	0	0	0	0	0	0	0	0	0	0	0	0	0	0	0	0	0	0	0	0	0	0	0	0	0	0	0	0	0	0	0	0	0	0	0	0	0	0	0	0	0	0	0	0	0	0	0
PRKG1	0	0	0	0	0	0	0	0	0	0	0	0	0	0	0	0	0	0	0	0	0	0	0	0	0	0	0	0	0	0	0	0	0	0	0	0	0	0	0	0	0	0	0	0	0	0	0	0	0
PROC	0	0	0	0	0	0	0	0	0	0	0	0	0	0	0	0	0	0	0	0	0	0	0	0	0	0	0	0	0	0	0	0	0	0	0	0	0	0	0	0	0	0	0	0	0	0	0	0	0
PROCR	0	0	0	0	0	0	0	0	0	0	0	0	0	0	0	0	0	0	0	0	0	0	0	0	0	0	0	0	0	0	0	0	0	0	0	0	0	0	0	0	0	0	0	0	0	0	0	0	0
PROS1	0	0	0	0	0	0	0	0	0	0	0	0	0	0	0	0	0	0	0	0	0	0	0	0	0	0	0	0	0	0	0	0	0	0	0	0	0	0	0	0	0	0	0	0	0	0	0	0	0
PROZ	0	0	0	0	0	0	0	0	0	0	0	0	0	0	0	0	0	0	0	0	0	0	0	0	0	0	0	0	0	0	0	0	0	0	0	0	0	0	0	0	0	0	0	0	0	0	0	0	0
PRSS56	0	0	3	0.00729927	22	0.0202952	0	0	0	0	6	0.010101	0	0	3	0.00512821	0	0	0	0	3	0.00585938	19	0.036965	1	0.00268817	1	0.00176678	4	0.00821355	0	0	7	0.0119658	0	0	8	0.0161943	1	0.00392157	5	0.0113122	2	0.00454545	3	0.0201342	14	0.0280561	1
PTEN	2	0.0229885	0	0	0	0	0	0	0	0	0	0	0	0	0	0	0	0	0	0	0	0	0	0	0	0	0	0	0	0	0	0	0	0	0	0	0	0	0	0	0	0	0	0	0	0	0	0	0
PTGER3	0	0	0	0	0	0	0	0	0	0	0	0	0	0	0	0	0	0	0	0	0	0	0	0	0	0	0	0	0	0	0	0	0	0	0	0	0	0	0	0	0	0	0	0	0	0	0	0	0
PTGER4	0	0	0	0	0	0	0	0	0	0	0	0	0	0	0	0	0	0	0	0	0	0	0	0	0	0	0	0	0	0	0	0	0	0	0	0	0	0	0	0	0	0	0	0	0	0	0	0	0
PTK2	0	0	0	0	0	0	0	0	0	0	0	0	0	0	0	0	0	0	0	0	0	0	0	0	0	0	0	0	0	0	0	0	0	0	0	0	0	0	0	0	0	0	0	0	0	0	0	0	0
PTK7	0	0	0	0	0	0	0	0	0	0	0	0	0	0	0	0	0	0	0	0	0	0	0	0	0	0	0	0	0	0	0	0	0	0	0	0	0	0	0	0	0	0	0	0	0	0	0	0	0
PTPN6	0	0	0	0	0	0	0	0	0	0	0	0	0	0	0	0	0	0	0	0	0	0	0	0	0	0	0	0	0	0	0	0	0	0	0	0	0	0	0	0	0	0	0	0	0	0	0	0	0
PTPRJ	0	0	0	0	0	0	0	0	0	0	0	0	0	0	0	0	0	0	0	0	0	0	0	0	0	0	0	0	0	0	0	0	0	0	0	0	0	0	0	0	0	0	0	0	0	0	0	0	0
RAB27A	0	0	0	0	0	0	0	0	0	0	0	0	0	0	0	0	0	0	0	0	0	0	0	0	0	0	0	0	0	0	0	0	0	0	0	0	0	0	0	0	0	0	0	0	0	0	0	0	0
RAB3A	0	0	0	0	0	0	0	0	0	0	0	0	0	0	0	0	0	0	0	0	0	0	0	0	0	0	0	0	0	0	0	0	0	0	0	0	0	0	0	0	0	0	0	0	0	0	0	0	0
RAP2B	0	0	0	0	0	0	0	0	0	0	0	0	0	0	0	0	0	0	0	0	0	0	0	0	0	0	0	0	0	0	0	0	0	0	0	0	0	0	0	0	0	0	0	0	0	0	0	0	0
REG3A	0	0	0	0	0	0	0	0	0	0	0	0	0	0	0	0	0	0	0	0	0	0	0	0	0	0	0	0	0	0	0	0	0	0	0	0	0	0	0	0	0	0	0	0	0	0	0	0	0
REG3G	0	0	0	0	0	0	0	0	0	0	0	0	0	0	0	0	0	0	0	0	0	0	0	0	0	0	0	0	0	0	0	0	0	0	0	0	0	0	0	0	0	0	0	0	0	0	0	0	0
RREB1	0	0	0	0	0	0	0	0	0	0	0	0	0	0	0	0	0	0	0	0	0	0	0	0	0	0	0	0	0	0	0	0	0	0	0	0	0	0	0	0	0	0	0	0	0	0	0	0	0
S100A9	0	0	0	0	0	0	0	0	0	0	0	0	0	0	0	0	0	0	0	0	0	0	0	0	0	0	0	0	0	0	0	0	0	0	0	0	0	0	0	0	0	0	0	0	0	0	0	0	0
SCNN1B	0	0	0	0	0	0	0	0	0	0	0	0	0	0	0	0	0	0	0	0	0	0	0	0	0	0	0	0	0	0	0	0	0	0	0	0	0	0	0	0	0	0	0	0	0	0	0	0	0
SCNN1G	0	0	0	0	0	0	0	0	0	0	0	0	0	0	0	0	0	0	0	0	0	0	0	0	0	0	0	0	0	0	0	0	0	0	0	0	0	0	0	0	0	0	0	0	0	0	0	0	0
SCRIB	0	0	0	0	0	0	0	0	0	0	0	0	0	0	0	0	0	0	0	0	0	0	0	0	0	0	0	0	0	0	0	0	0	0	0	0	0	0	0	0	0	0	0	0	0	0	0	0	0
SDC1	0	0	0	0	0	0	0	0	0	0	0	0	0	0	0	0	0	0	0	0	0	0	0	0	0	0	0	0	0	0	0	0	0	0	0	0	0	0	0	0	0	0	0	0	0	0	0	0	0
SDC4	0	0	0	0	0	0	0	0	0	0	0	0	0	0	0	0	0	0	0	0	0	0	0	0	0	0	0	0	0	0	0	0	0	0	0	0	0	0	0	0	0	0	0	0	0	0	0	0	0
SELP	0	0	0	0	0	0	0	0	0	0	0	0	0	0	0	0	0	0	0	0	0	0	0	0	0	0	0	0	0	0	0	0	0	0	0	0	0	0	0	0	0	0	0	0	0	0	0	0	0
SERPINA10	0	0	0	0	0	0	0	0	0	0	0	0	0	0	0	0	0	0	0	0	0	0	0	0	0	0	0	0	0	0	0	0	0	0	0	0	0	0	0	0	0	0	0	0	0	0	0	0	0
SERPINB2	0	0	0	0	0	0	0	0	0	0	0	0	0	0	0	0	0	0	0	0	0	0	0	0	0	0	0	0	0	0	0	0	0	0	0	0	0	0	0	0	0	0	0	0	0	0	0	0	0
SERPINC1	0	0	0	0	0	0	0	0	0	0	0	0	0	0	0	0	0	0	0	0	0	0	0	0	0	0	0	0	0	0	0	0	0	0	0	0	0	0	0	0	0	0	0	0	0	0	0	0	0
SERPIND1	0	0	10	0.0243309	44	0.0405904	6	0.020202	0	0	16	0.026936	12	0.0659341	40	0.0683761	10	0.0191205	7	0.107692	40	0.078125	24	0.0466926	9	0.0241935	15	0.0265018	12	0.0246407	1	0.0114943	22	0.0376068	5	0.0271739	25	0.0506073	17	0.0666667	14	0.0316742	16	0.0363636	14	0.0939597	16	0.0320641	8
SERPINE1	8	0.091954	0	0	0	0	0	0	0	0	0	0	0	0	0	0	0	0	0	0	0	0	0	0	0	0	0	0	0	0	0	0	0	0	0	0	0	0	0	0	0	0	0	0	0	0	0	0	0
SERPINE2	0	0	0	0	0	0	0	0	0	0	0	0	0	0	0	0	0	0	0	0	0	0	0	0	0	0	0	0	0	0	0	0	0	0	0	0	0	0	0	0	0	0	0	0	0	0	0	0	0
SERPINF2	0	0	0	0	0	0	0	0	0	0	0	0	0	0	0	0	0	0	0	0	0	0	0	0	0	0	0	0	0	0	0	0	0	0	0	0	0	0	0	0	0	0	0	0	0	0	0	0	0
SERPING1	0	0	0	0	0	0	0	0	0	0	0	0	0	0	0	0	0	0	0	0	0	0	0	0	0	0	0	0	0	0	0	0	0	0	0	0	0	0	0	0	0	0	0	0	0	0	0	0	0
SH2B3	0	0	0	0	0	0	0	0	0	0	0	0	0	0	0	0	0	0	0	0	0	0	0	0	0	0	0	0	0	0	0	0	0	0	0	0	0	0	0	0	0	0	0	0	0	0	0	0	0
SHH	0	0	0	0	0	0	0	0	0	0	0	0	0	0	0	0	0	0	0	0	0	0	0	0	0	0	0	0	0	0	0	0	0	0	0	0	0	0	0	0	0	0	0	0	0	0	0	0	0
SLC11A1	0	0	0	0	0	0	0	0	0	0	0	0	0	0	0	0	0	0	0	0	0	0	0	0	0	0	0	0	0	0	0	0	0	0	0	0	0	0	0	0	0	0	0	0	0	0	0	0	0
SLC12A2	0	0	0	0	0	0	0	0	0	0	0	0	0	0	0	0	0	0	0	0	0	0	0	0	0	0	0	0	0	0	0	0	0	0	0	0	0	0	0	0	0	0	0	0	0	0	0	0	0
SLC4A1	0	0	0	0	0	0	0	0	0	0	0	0	0	0	0	0	0	0	0	0	0	0	0	0	0	0	0	0	0	0	0	0	0	0	0	0	0	0	0	0	0	0	0	0	0	0	0	0	0
SLC7A11	0	0	16	0.0389294	24	0.0221402	8	0.026936	0	0	9	0.0151515	6	0.032967	7	0.0119658	7	0.0133843	1	0.0153846	15	0.0292969	15	0.0291829	5	0.0134409	12	0.0212014	9	0.0184805	3	0.0344828	14	0.0239316	2	0.0108696	14	0.0283401	10	0.0392157	10	0.0226244	13	0.0295455	5	0.033557	8	0.0160321	1
SMAD3	0	0	11	0.026764	28	0.0258303	6	0.020202	1	0.0277778	7	0.0117845	5	0.0274725	11	0.0188034	10	0.0191205	1	0.0153846	13	0.0253906	6	0.0116732	0	0	10	0.0176678	8	0.0164271	2	0.0229885	14	0.0239316	6	0.0326087	8	0.0161943	9	0.0352941	5	0.0113122	14	0.0318182	5	0.033557	6	0.012024	3
SMAD4	3	0.0344828	0	0	0	0	0	0	0	0	0	0	0	0	0	0	0	0	0	0	0	0	0	0	0	0	0	0	0	0	0	0	0	0	0	0	0	0	0	0	0	0	0	0	0	0	0	0	0
SMOC2	0	0	0	0	0	0	0	0	0	0	0	0	0	0	0	0	0	0	0	0	0	0	0	0	0	0	0	0	0	0	0	0	0	0	0	0	0	0	0	0	0	0	0	0	0	0	0	0	0
SNAI2	0	0	0	0	0	0	0	0	0	0	0	0	0	0	0	0	0	0	0	0	0	0	0	0	0	0	0	0	0	0	0	0	0	0	0	0	0	0	0	0	0	0	0	0	0	0	0	0	0
SRF	0	0	0	0	0	0	0	0	0	0	0	0	0	0	0	0	0	0	0	0	0	0	0	0	0	0	0	0	0	0	0	0	0	0	0	0	0	0	0	0	0	0	0	0	0	0	0	0	0
SRSF6	0	0	0	0	0	0	0	0	0	0	0	0	0	0	0	0	0	0	0	0	0	0	0	0	0	0	0	0	0	0	0	0	0	0	0	0	0	0	0	0	0	0	0	0	0	0	0	0	0
ST3GAL4	0	0	0	0	0	0	0	0	0	0	0	0	0	0	0	0	0	0	0	0	0	0	0	0	0	0	0	0	0	0	0	0	0	0	0	0	0	0	0	0	0	0	0	0	0	0	0	0	0
STARD13	0	0	0	0	0	0	0	0	0	0	0	0	0	0	0	0	0	0	0	0	0	0	0	0	0	0	0	0	0	0	0	0	0	0	0	0	0	0	0	0	0	0	0	0	0	0	0	0	0
STXBP1	0	0	0	0	0	0	0	0	0	0	0	0	0	0	0	0	0	0	0	0	0	0	0	0	0	0	0	0	0	0	0	0	0	0	0	0	0	0	0	0	0	0	0	0	0	0	0	0	0
STXBP3	0	0	4	0.00973236	32	0.0295203	3	0.010101	0	0	18	0.030303	1	0.00549451	8	0.0136752	2	0.00382409	1	0.0153846	12	0.0234375	18	0.0350195	10	0.0268817	7	0.0123675	3	0.00616016	4	0.045977	7	0.0119658	2	0.0108696	14	0.0283401	0	0	2	0.00452489	7	0.0159091	1	0.00671141	7	0.0140281	2
SYK	3	0.0344828	0	0	0	0	0	0	0	0	0	0	0	0	0	0	0	0	0	0	0	0	0	0	0	0	0	0	0	0	0	0	0	0	0	0	0	0	0	0	0	0	0	0	0	0	0	0	0
SYT11	0	0	0	0	0	0	0	0	0	0	0	0	0	0	0	0	0	0	0	0	0	0	0	0	0	0	0	0	0	0	0	0	0	0	0	0	0	0	0	0	0	0	0	0	0	0	0	0	0
SYT7	0	0	0	0	0	0	0	0	0	0	0	0	0	0	0	0	0	0	0	0	0	0	0	0	0	0	0	0	0	0	0	0	0	0	0	0	0	0	0	0	0	0	0	0	0	0	0	0	0
SYTL4	0	0	0	0	0	0	0	0	0	0	0	0	0	0	0	0	0	0	0	0	0	0	0	0	0	0	0	0	0	0	0	0	0	0	0	0	0	0	0	0	0	0	0	0	0	0	0	0	0
TBXA2R	0	0	0	0	0	0	0	0	0	0	0	0	0	0	0	0	0	0	0	0	0	0	0	0	0	0	0	0	0	0	0	0	0	0	0	0	0	0	0	0	0	0	0	0	0	0	0	0	0
TFPI	0	0	0	0	0	0	0	0	0	0	0	0	0	0	0	0	0	0	0	0	0	0	0	0	0	0	0	0	0	0	0	0	0	0	0	0	0	0	0	0	0	0	0	0	0	0	0	0	0
TFPI2	0	0	0	0	0	0	0	0	0	0	0	0	0	0	0	0	0	0	0	0	0	0	0	0	0	0	0	0	0	0	0	0	0	0	0	0	0	0	0	0	0	0	0	0	0	0	0	0	0
TGFB1	0	0	0	0	0	0	0	0	0	0	0	0	0	0	0	0	0	0	0	0	0	0	0	0	0	0	0	0	0	0	0	0	0	0	0	0	0	0	0	0	0	0	0	0	0	0	0	0	0
TGFB2	0	0	0	0	0	0	0	0	0	0	0	0	0	0	0	0	0	0	0	0	0	0	0	0	0	0	0	0	0	0	0	0	0	0	0	0	0	0	0	0	0	0	0	0	0	0	0	0	0
THBD	0	0	0	0	0	0	0	0	0	0	0	0	0	0	0	0	0	0	0	0	0	0	0	0	0	0	0	0	0	0	0	0	0	0	0	0	0	0	0	0	0	0	0	0	0	0	0	0	0
THBS1	0	0	0	0	0	0	0	0	0	0	0	0	0	0	0	0	0	0	0	0	0	0	0	0	0	0	0	0	0	0	0	0	0	0	0	0	0	0	0	0	0	0	0	0	0	0	0	0	0
TIMP1	0	0	0	0	0	0	0	0	0	0	0	0	0	0	0	0	0	0	0	0	0	0	0	0	0	0	0	0	0	0	0	0	0	0	0	0	0	0	0	0	0	0	0	0	0	0	0	0	0
TLR4	0	0	0	0	0	0	0	0	0	0	0	0	0	0	0	0	0	0	0	0	0	0	0	0	0	0	0	0	0	0	0	0	0	0	0	0	0	0	0	0	0	0	0	0	0	0	0	0	0
TMEFF2	0	0	0	0	0	0	0	0	0	0	0	0	0	0	0	0	0	0	0	0	0	0	0	0	0	0	0	0	0	0	0	0	0	0	0	0	0	0	0	0	0	0	0	0	0	0	0	0	0
TNF	0	0	0	0	0	0	0	0	0	0	0	0	0	0	0	0	0	0	0	0	0	0	0	0	0	0	0	0	0	0	0	0	0	0	0	0	0	0	0	0	0	0	0	0	0	0	0	0	0
TNFRSF12A	0	0	0	0	0	0	0	0	0	0	0	0	0	0	0	0	0	0	0	0	0	0	0	0	0	0	0	0	0	0	0	0	0	0	0	0	0	0	0	0	0	0	0	0	0	0	0	0	0
TOR1A	0	0	0	0	0	0	0	0	0	0	0	0	0	0	0	0	0	0	0	0	0	0	0	0	0	0	0	0	0	0	0	0	0	0	0	0	0	0	0	0	0	0	0	0	0	0	0	0	0
TPM1	0	0	0	0	0	0	0	0	0	0	0	0	0	0	0	0	0	0	0	0	0	0	0	0	0	0	0	0	0	0	0	0	0	0	0	0	0	0	0	0	0	0	0	0	0	0	0	0	0
TPSAB1	0	0	0	0	0	0	0	0	0	0	0	0	0	0	0	0	0	0	0	0	0	0	0	0	0	0	0	0	0	0	0	0	0	0	0	0	0	0	0	0	0	0	0	0	0	0	0	0	0
TREML1	0	0	0	0	0	0	0	0	0	0	0	0	0	0	0	0	0	0	0	0	0	0	0	0	0	0	0	0	0	0	0	0	0	0	0	0	0	0	0	0	0	0	0	0	0	0	0	0	0
TRIM72	0	0	0	0	0	0	0	0	0	0	0	0	0	0	0	0	0	0	0	0	0	0	0	0	0	0	0	0	0	0	0	0	0	0	0	0	0	0	0	0	0	0	0	0	0	0	0	0	0
TSPAN32	0	0	0	0	0	0	0	0	0	0	0	0	0	0	0	0	0	0	0	0	0	0	0	0	0	0	0	0	0	0	0	0	0	0	0	0	0	0	0	0	0	0	0	0	0	0	0	0	0
TSPAN8	0	0	0	0	0	0	0	0	0	0	0	0	0	0	0	0	0	0	0	0	0	0	0	0	0	0	0	0	0	0	0	0	0	0	0	0	0	0	0	0	0	0	0	0	0	0	0	0	0
TXK	0	0	0	0	0	0	0	0	0	0	0	0	0	0	0	0	0	0	0	0	0	0	0	0	0	0	0	0	0	0	0	0	0	0	0	0	0	0	0	0	0	0	0	0	0	0	0	0	0
TYRO3	0	0	0	0	0	0	0	0	0	0	0	0	0	0	0	0	0	0	0	0	0	0	0	0	0	0	0	0	0	0	0	0	0	0	0	0	0	0	0	0	0	0	0	0	0	0	0	0	0
UBASH3A	0	0	0	0	0	0	0	0	0	0	0	0	0	0	0	0	0	0	0	0	0	0	0	0	0	0	0	0	0	0	0	0	0	0	0	0	0	0	0	0	0	0	0	0	0	0	0	0	0
UBASH3B	0	0	0	0	0	0	0	0	0	0	0	0	0	0	0	0	0	0	0	0	0	0	0	0	0	0	0	0	0	0	0	0	0	0	0	0	0	0	0	0	0	0	0	0	0	0	0	0	0
VANGL2	0	0	0	0	0	0	0	0	0	0	0	0	0	0	0	0	0	0	0	0	0	0	0	0	0	0	0	0	0	0	0	0	0	0	0	0	0	0	0	0	0	0	0	0	0	0	0	0	0
VEGFA	0	0	0	0	0	0	0	0	0	0	0	0	0	0	0	0	0	0	0	0	0	0	0	0	0	0	0	0	0	0	0	0	0	0	0	0	0	0	0	0	0	0	0	0	0	0	0	0	0
VEGFB	0	0	0	0	0	0	0	0	0	0	0	0	0	0	0	0	0	0	0	0	0	0	0	0	0	0	0	0	0	0	0	0	0	0	0	0	0	0	0	0	0	0	0	0	0	0	0	0	0
VIL1	0	0	0	0	0	0	0	0	0	0	0	0	0	0	0	0	0	0	0	0	0	0	0	0	0	0	0	0	0	0	0	0	0	0	0	0	0	0	0	0	0	0	0	0	0	0	0	0	0
VKORC1	0	0	0	0	0	0	0	0	0	0	0	0	0	0	0	0	0	0	0	0	0	0	0	0	0	0	0	0	0	0	0	0	0	0	0	0	0	0	0	0	0	0	0	0	0	0	0	0	0
VPS33B	0	0	0	0	0	0	0	0	0	0	0	0	0	0	0	0	0	0	0	0	0	0	0	0	0	0	0	0	0	0	0	0	0	0	0	0	0	0	0	0	0	0	0	0	0	0	0	0	0
VWF	0	0	0	0	0	0	0	0	0	0	0	0	0	0	0	0	0	0	0	0	0	0	0	0	0	0	0	0	0	0	0	0	0	0	0	0	0	0	0	0	0	0	0	0	0	0	0	0	0
WFDC1	0	0	0	0	0	0	0	0	0	0	0	0	0	0	0	0	0	0	0	0	0	0	0	0	0	0	0	0	0	0	0	0	0	0	0	0	0	0	0	0	0	0	0	0	0	0	0	0	0
WNT3A	0	0	0	0	0	0	0	0	0	0	0	0	0	0	0	0	0	0	0	0	0	0	0	0	0	0	0	0	0	0	0	0	0	0	0	0	0	0	0	0	0	0	0	0	0	0	0	0	0
WNT4	0	0	0	0	0	0	0	0	0	0	0	0	0	0	0	0	0	0	0	0	0	0	0	0	0	0	0	0	0	0	0	0	0	0	0	0	0	0	0	0	0	0	0	0	0	0	0	0	0
WNT5A	0	0	0	0	0	0	0	0	0	0	0	0	0	0	0	0	0	0	0	0	0	0	0	0	0	0	0	0	0	0	0	0	0	0	0	0	0	0	0	0	0	0	0	0	0	0	0	0	0
WNT7A	0	0	0	0	0	0	0	0	0	0	0	0	0	0	0	0	0	0	0	0	0	0	0	0	0	0	0	0	0	0	0	0	0	0	0	0	0	0	0	0	0	0	0	0	0	0	0	0	0
XBP1	1	0.0114943	21	0.0510949	14	0.0129151	4	0.013468	1	0.0277778	11	0.0185185	3	0.0164835	11	0.0188034	11	0.0210325	1	0.0153846	19	0.0371094	19	0.036965	2	0.00537634	16	0.0282686	9	0.0184805	6	0.0689655	9	0.0153846	7	0.0380435	16	0.0323887	8	0.0313725	14	0.0316742	18	0.0409091	6	0.0402685	5	0.01002	5
YAP1	1	0.0114943	18	0.0437956	27	0.0249077	21	0.0707071	2	0.0555556	25	0.0420875	7	0.0384615	13	0.0222222	11	0.0210325	3	0.0461538	15	0.0292969	6	0.0116732	10	0.0268817	15	0.0265018	12	0.0246407	3	0.0344828	17	0.0290598	3	0.0163043	7	0.01417	7	0.027451	18	0.040724	5	0.0113636	0	0	7	0.0140281	1
[truncated: 8 more columns]

## Sheet: ST9
Supplementary Table 9. Mean frequency of protein low alteration per TCGA Pan-Cancer type
Genes	ACC		BLCA		BRCA		CESC		CHOL		COAD		ESCA		GBM		HNSC		KICH		KIRC		LGG		LIHC		LUAD		LUSC		MESO		OV		PAAD		PRAD		SARC		SKCM		STAD		TGCT		THCA		THYM
	N = 87	f	N = 411	f	N = 1084	f	N = 297	f	N = 36	f	N = 594	f	N = 182	f	N = 585	f	N = 523	f	N = 65	f	N = 512	f	N = 514	f	N = 372	f	N = 566	f	N = 487	f	N = 87	f	N = 585	f	N = 184	f	N = 494	f	N = 255	f	N = 442	f	N = 440	f	N = 149	f	N = 499	f	N = 123
ABAT	0	0	0	0	0	0	0	0	0	0	0	0	0	0	0	0	0	0	0	0	0	0	0	0	0	0	0	0	0	0	0	0	0	0	0	0	0	0	0	0	0	0	0	0	0	0	0	0	0
ABCC8	0	0	0	0	0	0	0	0	0	0	0	0	0	0	0	0	0	0	0	0	0	0	0	0	0	0	0	0	0	0	0	0	0	0	0	0	0	0	0	0	0	0	0	0	0	0	0	0	0
ACTA2	0	0	0	0	0	0	0	0	0	0	0	0	0	0	0	0	0	0	0	0	0	0	0	0	0	0	0	0	0	0	0	0	0	0	0	0	0	0	0	0	0	0	0	0	0	0	0	0	0
ACTG1	0	0	0	0	0	0	0	0	0	0	0	0	0	0	0	0	0	0	0	0	0	0	0	0	0	0	0	0	0	0	0	0	0	0	0	0	0	0	0	0	0	0	0	0	0	0	0	0	0
ACVRL1	0	0	2	0.00486618	7	0.00645756	0	0	0	0	3	0.00505051	0	0	2	0.0034188	1	0.00191205	1	0.0153846	6	0.0117188	8	0.0155642	13	0.0349462	3	0.00530035	2	0.00410678	0	0	6	0.0102564	3	0.0163043	4	0.00809717	3	0.0117647	4	0.00904977	0	0	1	0.00671141	4	0.00801603	1
ADAMTS13	0	0	0	0	0	0	0	0	0	0	0	0	0	0	0	0	0	0	0	0	0	0	0	0	0	0	0	0	0	0	0	0	0	0	0	0	0	0	0	0	0	0	0	0	0	0	0	0	0
ADAMTS18	0	0	0	0	0	0	0	0	0	0	0	0	0	0	0	0	0	0	0	0	0	0	0	0	0	0	0	0	0	0	0	0	0	0	0	0	0	0	0	0	0	0	0	0	0	0	0	0	0
ADIPOR2	0	0	0	0	0	0	0	0	0	0	0	0	0	0	0	0	0	0	0	0	0	0	0	0	0	0	0	0	0	0	0	0	0	0	0	0	0	0	0	0	0	0	0	0	0	0	0	0	0
ADRA2A	0	0	0	0	0	0	0	0	0	0	0	0	0	0	0	0	0	0	0	0	0	0	0	0	0	0	0	0	0	0	0	0	0	0	0	0	0	0	0	0	0	0	0	0	0	0	0	0	0
ADRA2C	0	0	0	0	0	0	0	0	0	0	0	0	0	0	0	0	0	0	0	0	0	0	0	0	0	0	0	0	0	0	0	0	0	0	0	0	0	0	0	0	0	0	0	0	0	0	0	0	0
ADRB1	0	0	0	0	0	0	0	0	0	0	0	0	0	0	0	0	0	0	0	0	0	0	0	0	0	0	0	0	0	0	0	0	0	0	0	0	0	0	0	0	0	0	0	0	0	0	0	0	0
ADRB2	0	0	0	0	0	0	0	0	0	0	0	0	0	0	0	0	0	0	0	0	0	0	0	0	0	0	0	0	0	0	0	0	0	0	0	0	0	0	0	0	0	0	0	0	0	0	0	0	0
ADTRP	0	0	0	0	0	0	0	0	0	0	0	0	0	0	0	0	0	0	0	0	0	0	0	0	0	0	0	0	0	0	0	0	0	0	0	0	0	0	0	0	0	0	0	0	0	0	0	0	0
AGER	0	0	0	0	0	0	0	0	0	0	0	0	0	0	0	0	0	0	0	0	0	0	0	0	0	0	0	0	0	0	0	0	0	0	0	0	0	0	0	0	0	0	0	0	0	0	0	0	0
AHNAK2	0	0	0	0	0	0	0	0	0	0	0	0	0	0	0	0	0	0	0	0	0	0	0	0	0	0	0	0	0	0	0	0	0	0	0	0	0	0	0	0	0	0	0	0	0	0	0	0	0
AJAP1	0	0	0	0	0	0	0	0	0	0	0	0	0	0	0	0	0	0	0	0	0	0	0	0	0	0	0	0	0	0	0	0	0	0	0	0	0	0	0	0	0	0	0	0	0	0	0	0	0
AJUBA	0	0	0	0	0	0	0	0	0	0	0	0	0	0	0	0	0	0	0	0	0	0	0	0	0	0	0	0	0	0	0	0	0	0	0	0	0	0	0	0	0	0	0	0	0	0	0	0	0
ALOX12	0	0	0	0	0	0	0	0	0	0	0	0	0	0	0	0	0	0	0	0	0	0	0	0	0	0	0	0	0	0	0	0	0	0	0	0	0	0	0	0	0	0	0	0	0	0	0	0	0
ALOX15	0	0	0	0	0	0	0	0	0	0	0	0	0	0	0	0	0	0	0	0	0	0	0	0	0	0	0	0	0	0	0	0	0	0	0	0	0	0	0	0	0	0	0	0	0	0	0	0	0
ALOX5	0	0	0	0	0	0	0	0	0	0	0	0	0	0	0	0	0	0	0	0	0	0	0	0	0	0	0	0	0	0	0	0	0	0	0	0	0	0	0	0	0	0	0	0	0	0	0	0	0
ANO6	0	0	0	0	0	0	0	0	0	0	0	0	0	0	0	0	0	0	0	0	0	0	0	0	0	0	0	0	0	0	0	0	0	0	0	0	0	0	0	0	0	0	0	0	0	0	0	0	0
ANXA1	1	0.0114943	9	0.0218978	18	0.0166052	4	0.013468	0	0	7	0.0117845	0	0	9	0.0153846	4	0.00764818	3	0.0461538	18	0.0351562	0	0	13	0.0349462	8	0.0141343	6	0.0123203	0	0	26	0.0444444	7	0.0380435	7	0.01417	7	0.027451	4	0.00904977	6	0.0136364	1	0.00671141	14	0.0280561	0
ANXA2	0	0	0	0	0	0	0	0	0	0	0	0	0	0	0	0	0	0	0	0	0	0	0	0	0	0	0	0	0	0	0	0	0	0	0	0	0	0	0	0	0	0	0	0	0	0	0	0	0
ANXA5	0	0	0	0	0	0	0	0	0	0	0	0	0	0	0	0	0	0	0	0	0	0	0	0	0	0	0	0	0	0	0	0	0	0	0	0	0	0	0	0	0	0	0	0	0	0	0	0	0
ANXA6	0	0	0	0	0	0	0	0	0	0	0	0	0	0	0	0	0	0	0	0	0	0	0	0	0	0	0	0	0	0	0	0	0	0	0	0	0	0	0	0	0	0	0	0	0	0	0	0	0
ANXA8	0	0	0	0	0	0	0	0	0	0	0	0	0	0	0	0	0	0	0	0	0	0	0	0	0	0	0	0	0	0	0	0	0	0	0	0	0	0	0	0	0	0	0	0	0	0	0	0	0
AP3B1	0	0	0	0	0	0	0	0	0	0	0	0	0	0	0	0	0	0	0	0	0	0	0	0	0	0	0	0	0	0	0	0	0	0	0	0	0	0	0	0	0	0	0	0	0	0	0	0	0
APOE	0	0	0	0	0	0	0	0	0	0	0	0	0	0	0	0	0	0	0	0	0	0	0	0	0	0	0	0	0	0	0	0	0	0	0	0	0	0	0	0	0	0	0	0	0	0	0	0	0
APOH	0	0	0	0	0	0	0	0	0	0	0	0	0	0	0	0	0	0	0	0	0	0	0	0	0	0	0	0	0	0	0	0	0	0	0	0	0	0	0	0	0	0	0	0	0	0	0	0	0
AQP1	0	0	0	0	0	0	0	0	0	0	0	0	0	0	0	0	0	0	0	0	0	0	0	0	0	0	0	0	0	0	0	0	0	0	0	0	0	0	0	0	0	0	0	0	0	0	0	0	0
ARFGEF1	0	0	0	0	0	0	0	0	0	0	0	0	0	0	0	0	0	0	0	0	0	0	0	0	0	0	0	0	0	0	0	0	0	0	0	0	0	0	0	0	0	0	0	0	0	0	0	0	0
ARHGAP24	0	0	0	0	0	0	0	0	0	0	0	0	0	0	0	0	0	0	0	0	0	0	0	0	0	0	0	0	0	0	0	0	0	0	0	0	0	0	0	0	0	0	0	0	0	0	0	0	0
ARHGAP35	0	0	0	0	0	0	0	0	0	0	0	0	0	0	0	0	0	0	0	0	0	0	0	0	0	0	0	0	0	0	0	0	0	0	0	0	0	0	0	0	0	0	0	0	0	0	0	0	0
ARHGEF19	0	0	0	0	0	0	0	0	0	0	0	0	0	0	0	0	0	0	0	0	0	0	0	0	0	0	0	0	0	0	0	0	0	0	0	0	0	0	0	0	0	0	0	0	0	0	0	0	0
AXL	0	0	0	0	0	0	0	0	0	0	0	0	0	0	0	0	0	0	0	0	0	0	0	0	0	0	0	0	0	0	0	0	0	0	0	0	0	0	0	0	0	0	0	0	0	0	0	0	0
B4GALT1	0	0	0	0	0	0	0	0	0	0	0	0	0	0	0	0	0	0	0	0	0	0	0	0	0	0	0	0	0	0	0	0	0	0	0	0	0	0	0	0	0	0	0	0	0	0	0	0	0
BLK	0	0	0	0	0	0	0	0	0	0	0	0	0	0	0	0	0	0	0	0	0	0	0	0	0	0	0	0	0	0	0	0	0	0	0	0	0	0	0	0	0	0	0	0	0	0	0	0	0
BLOC1S3	0	0	0	0	0	0	0	0	0	0	0	0	0	0	0	0	0	0	0	0	0	0	0	0	0	0	0	0	0	0	0	0	0	0	0	0	0	0	0	0	0	0	0	0	0	0	0	0	0
BLOC1S4	0	0	0	0	0	0	0	0	0	0	0	0	0	0	0	0	0	0	0	0	0	0	0	0	0	0	0	0	0	0	0	0	0	0	0	0	0	0	0	0	0	0	0	0	0	0	0	0	0
BLOC1S6	0	0	0	0	0	0	0	0	0	0	0	0	0	0	0	0	0	0	0	0	0	0	0	0	0	0	0	0	0	0	0	0	0	0	0	0	0	0	0	0	0	0	0	0	0	0	0	0	0
BNC1	0	0	0	0	0	0	0	0	0	0	0	0	0	0	0	0	0	0	0	0	0	0	0	0	0	0	0	0	0	0	0	0	0	0	0	0	0	0	0	0	0	0	0	0	0	0	0	0	0
C1GALT1C1	0	0	0	0	0	0	0	0	0	0	0	0	0	0	0	0	0	0	0	0	0	0	0	0	0	0	0	0	0	0	0	0	0	0	0	0	0	0	0	0	0	0	0	0	0	0	0	0	0
C1QTNF1	0	0	0	0	0	0	0	0	0	0	0	0	0	0	0	0	0	0	0	0	0	0	0	0	0	0	0	0	0	0	0	0	0	0	0	0	0	0	0	0	0	0	0	0	0	0	0	0	0
C3	0	0	0	0	0	0	0	0	0	0	0	0	0	0	0	0	0	0	0	0	0	0	0	0	0	0	0	0	0	0	0	0	0	0	0	0	0	0	0	0	0	0	0	0	0	0	0	0	0
C9	0	0	0	0	0	0	0	0	0	0	0	0	0	0	0	0	0	0	0	0	0	0	0	0	0	0	0	0	0	0	0	0	0	0	0	0	0	0	0	0	0	0	0	0	0	0	0	0	0
CADM4	0	0	0	0	0	0	0	0	0	0	0	0	0	0	0	0	0	0	0	0	0	0	0	0	0	0	0	0	0	0	0	0	0	0	0	0	0	0	0	0	0	0	0	0	0	0	0	0	0
CARMIL2	0	0	0	0	0	0	0	0	0	0	0	0	0	0	0	0	0	0	0	0	0	0	0	0	0	0	0	0	0	0	0	0	0	0	0	0	0	0	0	0	0	0	0	0	0	0	0	0	0
CASK	0	0	0	0	0	0	0	0	0	0	0	0	0	0	0	0	0	0	0	0	0	0	0	0	0	0	0	0	0	0	0	0	0	0	0	0	0	0	0	0	0	0	0	0	0	0	0	0	0
CAV1	1	0.0114943	3	0.00729927	7	0.00645756	3	0.010101	0	0	5	0.00841751	4	0.021978	0	0	7	0.0133843	1	0.0153846	15	0.0292969	4	0.0077821	3	0.00806452	6	0.0106007	1	0.00205339	0	0	0	0	0	0	19	0.0384615	1	0.00392157	5	0.0113122	4	0.00909091	0	0	2	0.00400802	6
CAV3	0	0	0	0	0	0	0	0	0	0	0	0	0	0	0	0	0	0	0	0	0	0	0	0	0	0	0	0	0	0	0	0	0	0	0	0	0	0	0	0	0	0	0	0	0	0	0	0	0
CCL2	0	0	0	0	0	0	0	0	0	0	0	0	0	0	0	0	0	0	0	0	0	0	0	0	0	0	0	0	0	0	0	0	0	0	0	0	0	0	0	0	0	0	0	0	0	0	0	0	0
CCM2L	0	0	0	0	0	0	0	0	0	0	0	0	0	0	0	0	0	0	0	0	0	0	0	0	0	0	0	0	0	0	0	0	0	0	0	0	0	0	0	0	0	0	0	0	0	0	0	0	0
CCN1	0	0	0	0	0	0	0	0	0	0	0	0	0	0	0	0	0	0	0	0	0	0	0	0	0	0	0	0	0	0	0	0	0	0	0	0	0	0	0	0	0	0	0	0	0	0	0	0	0
CCN4	0	0	0	0	0	0	0	0	0	0	0	0	0	0	0	0	0	0	0	0	0	0	0	0	0	0	0	0	0	0	0	0	0	0	0	0	0	0	0	0	0	0	0	0	0	0	0	0	0
CCR2	0	0	0	0	0	0	0	0	0	0	0	0	0	0	0	0	0	0	0	0	0	0	0	0	0	0	0	0	0	0	0	0	0	0	0	0	0	0	0	0	0	0	0	0	0	0	0	0	0
CD109	0	0	0	0	0	0	0	0	0	0	0	0	0	0	0	0	0	0	0	0	0	0	0	0	0	0	0	0	0	0	0	0	0	0	0	0	0	0	0	0	0	0	0	0	0	0	0	0	0
CD151	0	0	0	0	0	0	0	0	0	0	0	0	0	0	0	0	0	0	0	0	0	0	0	0	0	0	0	0	0	0	0	0	0	0	0	0	0	0	0	0	0	0	0	0	0	0	0	0	0
CD34	0	0	0	0	0	0	0	0	0	0	0	0	0	0	0	0	0	0	0	0	0	0	0	0	0	0	0	0	0	0	0	0	0	0	0	0	0	0	0	0	0	0	0	0	0	0	0	0	0
CD36	0	0	0	0	0	0	0	0	0	0	0	0	0	0	0	0	0	0	0	0	0	0	0	0	0	0	0	0	0	0	0	0	0	0	0	0	0	0	0	0	0	0	0	0	0	0	0	0	0
CD40LG	0	0	0	0	0	0	0	0	0	0	0	0	0	0	0	0	0	0	0	0	0	0	0	0	0	0	0	0	0	0	0	0	0	0	0	0	0	0	0	0	0	0	0	0	0	0	0	0	0
CD44	0	0	0	0	0	0	0	0	0	0	0	0	0	0	0	0	0	0	0	0	0	0	0	0	0	0	0	0	0	0	0	0	0	0	0	0	0	0	0	0	0	0	0	0	0	0	0	0	0
CD9	0	0	0	0	0	0	0	0	0	0	0	0	0	0	0	0	0	0	0	0	0	0	0	0	0	0	0	0	0	0	0	0	0	0	0	0	0	0	0	0	0	0	0	0	0	0	0	0	0
CDKN1A	1	0.0114943	14	0.0340633	25	0.0230627	1	0.003367	0	0	11	0.0185185	0	0	3	0.00512821	4	0.00764818	0	0	6	0.0117188	12	0.0233463	9	0.0241935	10	0.0176678	7	0.0143737	2	0.0229885	12	0.0205128	3	0.0163043	0	0	0	0	9	0.020362	15	0.0340909	4	0.0268456	7	0.0140281	0
CEACAM1	0	0	0	0	0	0	0	0	0	0	0	0	0	0	0	0	0	0	0	0	0	0	0	0	0	0	0	0	0	0	0	0	0	0	0	0	0	0	0	0	0	0	0	0	0	0	0	0	0
CELA2A	0	0	0	0	0	0	0	0	0	0	0	0	0	0	0	0	0	0	0	0	0	0	0	0	0	0	0	0	0	0	0	0	0	0	0	0	0	0	0	0	0	0	0	0	0	0	0	0	0
CELSR1	0	0	0	0	0	0	0	0	0	0	0	0	0	0	0	0	0	0	0	0	0	0	0	0	0	0	0	0	0	0	0	0	0	0	0	0	0	0	0	0	0	0	0	0	0	0	0	0	0
CFH	0	0	0	0	0	0	0	0	0	0	0	0	0	0	0	0	0	0	0	0	0	0	0	0	0	0	0	0	0	0	0	0	0	0	0	0	0	0	0	0	0	0	0	0	0	0	0	0	0
CFLAR	0	0	0	0	0	0	0	0	0	0	0	0	0	0	0	0	0	0	0	0	0	0	0	0	0	0	0	0	0	0	0	0	0	0	0	0	0	0	0	0	0	0	0	0	0	0	0	0	0
CLASP1	0	0	0	0	0	0	0	0	0	0	0	0	0	0	0	0	0	0	0	0	0	0	0	0	0	0	0	0	0	0	0	0	0	0	0	0	0	0	0	0	0	0	0	0	0	0	0	0	0
CLASP2	0	0	0	0	0	0	0	0	0	0	0	0	0	0	0	0	0	0	0	0	0	0	0	0	0	0	0	0	0	0	0	0	0	0	0	0	0	0	0	0	0	0	0	0	0	0	0	0	0
[truncated: 277 more rows]
[truncated: 8 more columns]

## Sheet: ST10
Supplementary Table 10. Mean frequency of fusion genes per TCGA Pan-Cancer type
[truncated: 349 more rows]
[truncated: 8 more columns]

[truncated: 11 more sheets: ST11, ST12, ST13, ST14, ST15, ST16, ST17, ST18, ST19, ST20, ST21]
